# Supplementary material
Source: Research Square preprint supplement (doi:10.21203/rs.3.rs-9357011/v1)
Supplement: Supplementary file 1 [file 1ced7e7fe6bc74873f82f210.xlsx]

## Sheet: Fig. 1
Fig. 1C	date
		L-Tyr			L-DOPA			Tyramine			DA			DOPAL
	WT	304.734	281.212	259.277	151.946	111.256	133.139	36.0917	22.0215	36.0759	29.2696	26.58	35.6906	42.993	31.2745	26.6014
	Slhsl1 Slhsl2 Slhsl3	362.218	312.982	369.597	13.7374	8.74103	11.0604	23.0459	16.0243	11.4428	12.2657	16.6019	26.9921	23.1789	12.4762	15.6758
	Table Analyzed
	Two-way RM ANOVA	Matching: Both fWTtors
	Assume sphericity?	No
	Alpha	0.05
	Source of Variation	% of total variation	P value	P value summary	Significant?	Geisser-Greenhouse's epsilon
	Row FWTtor	0.6833	0.0471	*	Yes	1
	Column FWTtor	91.87	0.0002	***	Yes	0.3332
	Row FWTtor x Column FWTtor	6.407	0.0214	*	Yes	0.2952
	Subject x Row FWTtor	0.06918
	Subject x Column FWTtor	0.2375
	Subject	0.3093
	ANOVA table	SS	DF	MS	F (DFn, DFd)	P value
	Row FWTtor	2845	1	2845	F (1.000, 2.000) = 19.75	P=0.0471
	Column FWTtor	382441	4	95610	F (1.333, 2.665) = 773.7	P=0.0002
	Row FWTtor x Column FWTtor	26670	4	6668	F (1.181, 2.362) = 30.18	P=0.0214
	Subject x Row FWTtor	288	2	144
	Subject x Column FWTtor	988.6	8	123.6
	Subject	1288	2	643.8
	Residual	1768	8	220.9
	Difference between row means
	Mean of WT	101.9
	Mean of Slhsl1 Slhsl2 Slhsl3	82.4
	Difference between means	19.47
	SE of difference	4.382
	95% CI of difference	0.6215 to 38.33
	Data summary
	Number of columns (Column FWTtor)	5
	Number of rows (Row FWTtor)	2
	Number of subjects (Subject)	3
	Number of missing values	0
	Compare eWTh cell mean with the other cell mean in that column
	Number of families	1
	Number of comparisons per family	5
	Alpha	0.05
	Sidak's multiple comparisons test	Mean Diff.	95.00% CI of diff.	Significant?	Summary	Adjusted P Value
	WT - Slhsl1 Slhsl2 Slhsl3
	L-Tyr	-66.52	-293.6 to 160.6	No	ns	0.4178
	L-DOPA	120.9	19.57 to 222.3	Yes	*	0.0355
	Tyramine	14.56	-38.80 to 67.92	No	ns	0.4589
	DA	11.89	-13.47 to 37.25	No	ns	0.2016
	DOPAL	16.51	-11.08 to 44.10	No	ns	0.1312
	Test details	Mean 1	Mean 2	Mean Diff.	SE of diff.	N1	N2	t	DF
	WT - Slhsl1 Slhsl2 Slhsl3
	L-Tyr	281.7	348.3	-66.52	23.12	3	3	2.877	2
	L-DOPA	132.1	11.18	120.9	10.32	3	3	11.72	2
	Tyramine	31.4	16.84	14.56	5.433	3	3	2.68	2
	DA	30.51	18.62	11.89	2.582	3	3	4.607	2
	DOPAL	33.62	17.11	16.51	2.809	3	3	5.879	2
Fig. 1D	date
		WT			Slhsl1 Slhsl2 Slhsl3
	0 h	1.22	1.68	3.41	1.74	2.51	2.86
	8 h	103.77	116.97	137.21	3.74	4.67	5.37
	16 h	6.36	5.55	5.31	2.06	3.11	2.54
	24 h	5.34	5.37	3.63	1.25	0.97	1.02
		Discovery?	P value	Mean of WT	Mean of Slhsl1 Slhsl2 Slhsl3	Difference	SE of difference	t ratio	df	q value
	0 h	No	0.738227	2.103	2.37	-0.2667	0.7443	0.3583	4	0.186402
	8 h	Yes	0.000297	119.3	4.593	114.7	9.736	11.78	4	0.0003
	16 h	Yes	0.001956	5.74	2.57	3.17	0.4393	7.216	4	0.000988
	24 h	Yes	0.003127	4.78	1.08	3.7	0.5815	6.363	4	0.001053
		P value	Mean of WT	Mean of Slhsl1 Slhsl2 Slhsl3	Difference	SE of difference	t ratio	df	q value
	8 h	0.000297	119.3	4.593	114.7	9.736	11.78	4	0.0003
	16 h	0.001956	5.74	2.57	3.17	0.4393	7.216	4	0.000988
	24 h	0.003127	4.78	1.08	3.7	0.5815	6.363	4	0.001053
Fig. 1E	date
	WT	repeat-1	repeat-2	repeat-3	repeat-4	repeat-5	repeat-6
	8 h	25	31.4286	27.2727	23.3333	30.5556	25.7143
	16 h	46.875	51.4286	54.5455	50	50	51.4286
	24 h	78.125	80	84.8485	83.3333	77.7778	80
	32 h	93.75	97.1429	96.9697	100	94.4444	91.4286
	Time to 50% abscssion rate (h)	15.8622	14.441	13.9378	15.1941	14.9264	14.7535
	WT+10μM L-DOPA	repeat-1	repeat-2	repeat-3	repeat-4	repeat-5	repeat-6
	8 h	31.25	37.1429	39.3939	34.375	37.1429	36.1111
	16 h	59.375	65.7143	66.6667	65.625	62.8571	61.1111
	24 h	93.75	88.5714	90.9091	96.875	97.1429	83.3333
	32 h	96.875	97.1429	100	100	100	100
	Time to 50% abscssion rate (h)	12.3525	11.0381	10.614	11.2764	11.168	12.1342
	WT+50μM L-DOPA	repeat-1	repeat-2	repeat-3	repeat-4	repeat-5	repeat-6
	8 h	40.625	45.7143	48.4848	40.625	45.7143	47.2222
	16 h	75	74.2857	84.8485	78.125	80	80.5556
	24 h	96.875	97.1429	100	96.875	97.1429	97.2222
	32 h	100	100	100	100	100	100
	Time to 50% abscssion rate (h)	9.66379	8.93937	8.22356	9.47038	8.70256	8.46933
	WT+100μM L-DOPA	repeat-1	repeat-2	repeat-3	repeat-4	repeat-5	repeat-6
	8 h	59.375	65.7143	66.6667	62.5	67.6471	60.6061
	16 h	81.25	91.4286	84.8485	84.375	94.1176	81.8182
	24 h	96.875	100	100	96.875	100	96.9697
	32 h	100	100	100	100	100	100
	Time to 50% abscssion rate (h)	6.16876	6.03859	4.86545	5.69355	6.12831	5.90817
	WT+200μM L-DOPA	repeat-1	repeat-2	repeat-3	repeat-4	repeat-5	repeat-6
	8 h	62.5	62.8571	63.6364	61.2903	65.7143	72.7273
	16 h	81.25	82.8571	84.8485	77.4194	80	90.9091
	24 h	96.875	100	100	100	100	100
	32 h	100	100	100	100	100	100
	Time to 50% abscssion rate (h)	5.41831	5.72905	5.71945	5.82051	4.66925	4.53771
	Table Analyzed
	Data sets analyzed	A-E
	ANOVA summary
	F	270.3
	P value	<0.0001
	P value summary	****
	Significant diff. among means (P < 0.05)?	Yes
	R squared	0.9774
	Brown-Forsythe test
	F (DFn, DFd)	0.1902 (4, 25)
	P value	0.9413
	P value summary	ns
	Are SDs significantly different (P < 0.05)?	No
	Bartlett's test
	Bartlett's statistic (corrected)	0.6007
	P value	0.963
	P value summary	ns
	Are SDs significantly different (P < 0.05)?	No
	ANOVA table	SS	DF	MS	F (DFn, DFd)	P value
	Treatment (between columns)	381.8	4	95.45	F (4, 25) = 270.3	P<0.0001
	Residual (within columns)	8.827	25	0.3531
	Total	390.6	29
	Data summary
	Number of treatments (columns)	5
	Number of values (total)	30
	Number of families	1
	Number of comparisons per family	10
	Alpha	0.05
	Tukey's multiple comparisons test	Mean Diff.	95.00% CI of diff.	Significant?	Summary	Adjusted P Value
	WT vs. 10μM L-DOPA	3.422	2.414 to 4.430	Yes	****	<0.0001	A-B
	WT vs. 50μM L-DOPA	5.941	4.933 to 6.949	Yes	****	<0.0001	A-C
	WT vs. 100μM L-DOPA	9.052	8.044 to 10.06	Yes	****	<0.0001	A-D
	WT vs. 200μM L-DOPA	9.537	8.529 to 10.54	Yes	****	<0.0001	A-E
	10μM L-DOPA vs. 50μM L-DOPA	2.519	1.511 to 3.527	Yes	****	<0.0001	B-C
	10μM L-DOPA vs. 100μM L-DOPA	5.63	4.622 to 6.638	Yes	****	<0.0001	B-D
	10μM L-DOPA vs. 200μM L-DOPA	6.115	5.107 to 7.122	Yes	****	<0.0001	B-E
	50μM L-DOPA vs. 100μM L-DOPA	3.111	2.103 to 4.119	Yes	****	<0.0001	C-D
	50μM L-DOPA vs. 200μM L-DOPA	3.596	2.588 to 4.603	Yes	****	<0.0001	C-E
	100μM L-DOPA vs. 200μM L-DOPA	0.4848	-0.5228 to 1.492	No	ns	0.6253	D-E
	Test details	Mean 1	Mean 2	Mean Diff.	SE of diff.	n1	n2	q	DF
	WT vs. 10μM L-DOPA	14.85	11.43	3.422	0.3431	6	6	14.11	25
	WT vs. 50μM L-DOPA	14.85	8.911	5.941	0.3431	6	6	24.49	25
	WT vs. 100μM L-DOPA	14.85	5.8	9.052	0.3431	6	6	37.31	25
	WT vs. 200μM L-DOPA	14.85	5.316	9.537	0.3431	6	6	39.31	25
	10μM L-DOPA vs. 50μM L-DOPA	11.43	8.911	2.519	0.3431	6	6	10.38	25
	10μM L-DOPA vs. 100μM L-DOPA	11.43	5.8	5.63	0.3431	6	6	23.21	25
	10μM L-DOPA vs. 200μM L-DOPA	11.43	5.316	6.115	0.3431	6	6	25.21	25
	50μM L-DOPA vs. 100μM L-DOPA	8.911	5.8	3.111	0.3431	6	6	12.82	25
	50μM L-DOPA vs. 200μM L-DOPA	8.911	5.316	3.596	0.3431	6	6	14.82	25
	100μM L-DOPA vs. 200μM L-DOPA	5.8	5.316	0.4848	0.3431	6	6	1.998	25
Fig. 1F	date
	WT	repeat-1	repeat-2	repeat-3	repeat-4	repeat-5	repeat-6
	8 h	29.4118	35.4839	27.7778	27.2727	32.2581	31.4286
	16 h	44.1176	58.0645	50	45.4545	58.0645	60
	24 h	85.2941	90.3226	77.7778	93.9394	87.0968	91.4286
	32 h	91.1765	96.7742	94.4444	100	100	100
	Time to 50% abscssion rate (h)	15.0604	12.1092	15.1862	14.6646	12.8405	12.4573
	slhsl1slhsl2slhsl3	repeat-1	repeat-2	repeat-3	repeat-4	repeat-5	repeat-6
	8 h	12.5	11.4286	9.09091	11.1111	9.375	8.82353
	16 h	28.125	28.5714	24.2424	25	25	23.5294
	24 h	40.625	37.1429	36.3636	38.8889	37.5	35.2941
	32 h	43.75	48.5714	48.4848	47.2222	50	47.0588
	40 h	53.125	54.2857	57.5758	55.5556	59.375	55.8824
	Time to 50% abscssion rate (h)	36.9759	34.4408	33.3367	34.0639	32.1323	34.5807
	slhsl1slhsl2slhsl3+100μM L-DOPA	repeat-1	repeat-2	repeat-3	repeat-4	repeat-5	repeat-6
	8 h	15.625	17.1429	18.1818	17.6471	19.4444	17.1429
	16 h	31.25	28.5714	30.303	32.3529	30.5556	31.4286
	24 h	40.625	37.1429	42.4242	41.1765	41.6667	42.8571
	32 h	46.875	48.5714	48.4848	50	52.7778	48.5714
	40 h	56.25	57.1429	60.6061	55.8824	61.1111	57.1429
	Time to 50% abscssion rate (h)	33.4601	33.7312	31.435	32.2991	30.3178	31.9068
	Table Analyzed
	Data sets analyzed	A-C
	ANOVA summary
	F	372.6
	P value	<0.0001
	P value summary	****
	Significant diff. among means (P < 0.05)?	Yes
	R squared	0.9803
	Brown-Forsythe test
	F (DFn, DFd)	0.1999 (2, 15)
	P value	0.8209
	P value summary	ns
	Are SDs significantly different (P < 0.05)?	No
	Bartlett's test
	Bartlett's statistic (corrected)	0.2497
	P value	0.8826
	P value summary	ns
	Are SDs significantly different (P < 0.05)?	No
	ANOVA table	SS	DF	MS	F (DFn, DFd)	P value
	Treatment (between columns)	1534	2	767.2	F (2, 15) = 372.6	P<0.0001
	Residual (within columns)	30.89	15	2.059
	Total	1565	17
	Data summary
	Number of treatments (columns)	3
	Number of values (total)	18
	Number of families	1
	Number of comparisons per family	3
	Alpha	0.05
	Tukey's multiple comparisons test	Mean Diff.	95.00% CI of diff.	Significant?	Summary	Adjusted P Value
	WT vs. Slhsl1 Slhsl2 Slhsl3	-20.54	-22.69 to -18.38	Yes	****	<0.0001	A-B
	WT vs. Slhsl1 Slhsl2 Slhsl3 + L-DOPA	-18.47	-20.62 to -16.32	Yes	****	<0.0001	A-C
	Slhsl1 Slhsl2 Slhsl3 vs. Slhsl1 Slhsl2 Slhsl3 + L-DOPA	2.063	-0.08855 to 4.215	No	ns	0.0611	B-C
	Test details	Mean 1	Mean 2	Mean Diff.	SE of diff.	n1	n2	q	DF
	WT vs. Slhsl1 Slhsl2 Slhsl3	13.72	34.26	-20.54	0.8285	6	6	35.05	15
	WT vs. Slhsl1 Slhsl2 Slhsl3 + L-DOPA	13.72	32.19	-18.47	0.8285	6	6	31.53	15
	Slhsl1 Slhsl2 Slhsl3 vs. Slhsl1 Slhsl2 Slhsl3 + L-DOPA	34.26	32.19	2.063	0.8285	6	6	3.522	15
Fig. 1I	date
	AR			AUR
	WT	Slhsl1 Slhsl2 Slhsl3		WT	Slhsl1 Slhsl2 Slhsl3
	111.959	51.023		84.365	47.693
	113.144	43.339		92.042	37.738
	117.968	54.412		113.337	21.292
	138.184	41.725		110.016	41.341
	Table Analyzed			Table Analyzed
	Column B	Slhsl1 Slhsl2 Slhsl3		Column B	Slhsl1 Slhsl2 Slhsl3
	vs.	vs.		vs.	vs.
	Column A	WT		Column A	WT
	Unpaired t test			Unpaired t test
	P value	<0.0001		P value	0.0004
	P value summary	****		P value summary	***
	Significantly different (P < 0.05)?	Yes		Significantly different (P < 0.05)?	Yes
	One- or two-tailed P value?	Two-tailed		One- or two-tailed P value?	Two-tailed
	t, df	t=10.67, df=6		t, df	t=7.012, df=6
	How big is the difference?			How big is the difference?
	Mean of column A	120.3		Mean of column A	99.94
	Mean of column B	47.62		Mean of column B	37.02
	Difference between means (B - A) ± SEM	-72.69 ± 6.812		Difference between means (B - A) ± SEM	-62.92 ± 8.974
	95% confidence interval	-89.36 to -56.02		95% confidence interval	-84.88 to -40.96
	R squared (eta squared)	0.9499		R squared (eta squared)	0.8912
	F test to compare variances			F test to compare variances
	F, DFn, Dfd	4.026, 3, 3		F, DFn, Dfd	1.540, 3, 3
	P value	0.2826		P value	0.7313
	P value summary	ns		P value summary	ns
	Significantly different (P < 0.05)?	No		Significantly different (P < 0.05)?	No
	Data analyzed			Data analyzed
	Sample size, column A	4		Sample size, column A	4
	Sample size, column B	4		Sample size, column B	4
Fig. 1J	date
	WT	repeat-1	repeat-2	repeat-3	repeat-4	repeat-5	repeat-6
	8 h	30.303	34.375	29.4118	28.125	33.3333	34.2857
	16 h	45.4545	56.25	52.9412	46.875	60	57.1429
	24 h	87.8788	87.5	82.3529	96.875	90	88.5714
	32 h	96.9697	100	97.0588	100	100	100
	Time to 50% abscssion rate (h)	14.6977	12.7844	14.1724	14.221	12.2862	12.6067
	slhsl1 slhsl2 slhsl3 pH6 + L-DOPA	repeat-1	repeat-2	repeat-3	repeat-4	repeat-5	repeat-6
	8	13.3333	14.7059	11.7647	12.1212	11.4286	12.9032
	16	30	29.4118	23.5294	27.2727	22.8571	22.5806
	24	40	38.2353	35.2941	42.4242	34.2857	29.0323
	32	50	50	47.0588	51.5152	45.7143	45.1613
	40	56.6667	55.8824	58.8235	60.6061	54.2857	51.6129
	Time to 50% abscssion rate (h)	32.151	33.1861	33.9998	30.1535	36.058	38.1937
	Slhsl1 Slhsl2 Slhsl3 pH7 + L-DOPA	repeat-1	repeat-2	repeat-3	repeat-4	repeat-5	repeat-6
	8 h	16.6667	16.2162	16.129	12.5	17.9487	17.6471
	16 h	26.6667	27.027	29.0323	25	28.2051	32.3529
	24 h	36.6667	40.5405	41.9355	37.5	38.4615	41.1765
	32 h	46.6667	48.6486	51.6129	50	48.7179	50
	40 h	56.6667	56.7568	58.0645	59.375	56.4103	58.8235
	Time to 50% abscssion rate (h)	34.635	33.1539	31.1012	32.5345	33.8028	31.3876
	Slhsl1 Slhsl2 Slhsl3 pH10 + L-DOPA	repeat-1	repeat-2	repeat-3	repeat-4	repeat-5	repeat-6
	8 h	43.3333	33.3333	38.7097	45.1613	42.4242	43.3333
	16 h	63.3333	63.8889	64.5161	67.7419	66.6667	70
	24 h	90	97.2222	93.5484	93.5484	93.9394	96.6667
	32 h	100	100	100	100	100	100
	Time to 50% abscssion rate (h)	10.2612	10.34	10.8662	8.72256	9.10296	8.83331
	Slhsl1 Slhsl2 Slhsl3 pH10 + L-DOPA + ASA	repeat-1	repeat-2	repeat-3	repeat-4	repeat-5	repeat-6
	8 h	16.6667	13.8889	16.129	12.9032	14.2857	17.6471
	16 h	26.6667	25	29.0323	29.0323	28.5714	32.3529
	24 h	36.6667	33.3333	38.7097	38.7097	37.1429	41.1765
	32 h	46.6667	41.6667	48.3871	48.3871	48.5714	52.9412
	40 h	56.6667	58.3333	58.0645	58.0645	57.1429	55.8824
	Time to 50% abscssion rate (h)	34.635	35.678	33.1043	32.7105	33.5446	31.1456
	Table Analyzed
	Data sets analyzed	A-E
	ANOVA summary
	F	302.6
	P value	<0.0001
	P value summary	****
	Significant diff. among means (P < 0.05)?	Yes
	R squared	0.9798
	Brown-Forsythe test
	F (DFn, DFd)	1.927 (4, 25)
	P value	0.1371
	P value summary	ns
	Are SDs significantly different (P < 0.05)?	No
	Bartlett's test
	Bartlett's statistic (corrected)	8.29
	P value	0.0815
	P value summary	ns
	Are SDs significantly different (P < 0.05)?	No
	ANOVA table	SS	DF	MS	F (DFn, DFd)	P value
	Treatment (between columns)	3476	4	869.1	F (4, 25) = 302.6	P<0.0001
	Residual (within columns)	71.81	25	2.872
	Total	3548	29
	Data summary
	Number of treatments (columns)	5
	Number of values (total)	30
	Number of families	1
	Number of comparisons per family	10
	Alpha	0.05
	Tukey's multiple comparisons test	Mean Diff.	95.00% CI of diff.	Significant?	Summary	Adjusted P Value
	WT vs. Slhsl1 Slhsl2 Slhsl3 pH 6 + L-DOPA	-20.5	-23.37 to -17.62	Yes	****	<0.0001	A-B
	WT vs. Slhsl1 Slhsl2 Slhsl3 pH7 + L-DOPA	-19.31	-22.18 to -16.43	Yes	****	<0.0001	A-C
	WT vs. Slhsl1 Slhsl2 Slhsl3 pH10 + L-DOPA	3.774	0.8999 to 6.647	Yes	**	0.0059	A-D
	WT vs. Slhsl1 Slhsl2 Slhsl3 pH10 + L-DOPA + ASA	-20.01	-22.88 to -17.13	Yes	****	<0.0001	A-E
	Slhsl1 Slhsl2 Slhsl3 pH 6 + L-DOPA vs. Slhsl1 Slhsl2 Slhsl3 pH7 + L-DOPA	1.188	-1.686 to 4.062	No	ns	0.7435	B-C
	Slhsl1 Slhsl2 Slhsl3 pH 6 + L-DOPA vs. Slhsl1 Slhsl2 Slhsl3 pH10 + L-DOPA	24.27	21.40 to 27.14	Yes	****	<0.0001	B-D
	Slhsl1 Slhsl2 Slhsl3 pH 6 + L-DOPA vs. Slhsl1 Slhsl2 Slhsl3 pH10 + L-DOPA + ASA	0.4874	-2.386 to 3.361	No	ns	0.9868	B-E
	Slhsl1 Slhsl2 Slhsl3 pH7 + L-DOPA vs. Slhsl1 Slhsl2 Slhsl3 pH10 + L-DOPA	23.08	20.21 to 25.96	Yes	****	<0.0001	C-D
	Slhsl1 Slhsl2 Slhsl3 pH7 + L-DOPA vs. Slhsl1 Slhsl2 Slhsl3 pH10 + L-DOPA + ASA	-0.7005	-3.574 to 2.173	No	ns	0.9509	C-E
	Slhsl1 Slhsl2 Slhsl3 pH10 + L-DOPA vs. Slhsl1 Slhsl2 Slhsl3 pH10 + L-DOPA + ASA	-23.78	-26.66 to -20.91	Yes	****	<0.0001	D-E
	Test details	Mean 1	Mean 2	Mean Diff.	SE of diff.	n1	n2	q	DF
	WT vs. Slhsl1 Slhsl2 Slhsl3 pH 6 + L-DOPA	13.46	33.96	-20.5	0.9785	6	6	29.62	25
	WT vs. Slhsl1 Slhsl2 Slhsl3 pH7 + L-DOPA	13.46	32.77	-19.31	0.9785	6	6	27.91	25
	WT vs. Slhsl1 Slhsl2 Slhsl3 pH10 + L-DOPA	13.46	9.688	3.774	0.9785	6	6	5.454	25
	WT vs. Slhsl1 Slhsl2 Slhsl3 pH10 + L-DOPA + ASA	13.46	33.47	-20.01	0.9785	6	6	28.92	25
	Slhsl1 Slhsl2 Slhsl3 pH 6 + L-DOPA vs. Slhsl1 Slhsl2 Slhsl3 pH7 + L-DOPA	33.96	32.77	1.188	0.9785	6	6	1.717	25
	Slhsl1 Slhsl2 Slhsl3 pH 6 + L-DOPA vs. Slhsl1 Slhsl2 Slhsl3 pH10 + L-DOPA	33.96	9.688	24.27	0.9785	6	6	35.08	25
	Slhsl1 Slhsl2 Slhsl3 pH 6 + L-DOPA vs. Slhsl1 Slhsl2 Slhsl3 pH10 + L-DOPA + ASA	33.96	33.47	0.4874	0.9785	6	6	0.7044	25
	Slhsl1 Slhsl2 Slhsl3 pH7 + L-DOPA vs. Slhsl1 Slhsl2 Slhsl3 pH10 + L-DOPA	32.77	9.688	23.08	0.9785	6	6	33.36	25
	Slhsl1 Slhsl2 Slhsl3 pH7 + L-DOPA vs. Slhsl1 Slhsl2 Slhsl3 pH10 + L-DOPA + ASA	32.77	33.47	-0.7005	0.9785	6	6	1.012	25
	Slhsl1 Slhsl2 Slhsl3 pH10 + L-DOPA vs. Slhsl1 Slhsl2 Slhsl3 pH10 + L-DOPA + ASA	9.688	33.47	-23.78	0.9785	6	6	34.37	25
Fig. 1L	date
	AR											AUR
	Slhsl1 Slhsl2 Slhsl3 pH7 + L-DOPA	Slhsl1 Slhsl2 Slhsl3 pH10 + L-DOPA	Slhsl1 Slhsl2 Slhsl3 pH10 + L-DOPA + ASA									Slhsl1 Slhsl2 Slhsl3 pH7 + L-DOPA	Slhsl1 Slhsl2 Slhsl3 pH10 + L-DOPA	Slhsl1 Slhsl2 Slhsl3 pH10 + L-DOPA + ASA
	53.67	162	52.043									55.701	183.919	41.108
	62.713	171.804	42.685									53.333	198.151	52.229
	53.751	178.221	62.061									46.031	196.512	31.751
	55.278	150.077	40.836									45.256	189.602	42.078
	Table Analyzed											Table Analyzed
	Data sets analyzed	A-C										Data sets analyzed	A-C
	ANOVA summary											ANOVA summary
	F	192.6										F	609.4
	P value	<0.0001										P value	<0.0001
	P value summary	****										P value summary	****
	Significant diff. among means (P < 0.05)?	Yes										Significant diff. among means (P < 0.05)?	Yes
	R squared	0.9772										R squared	0.9927
	Brown-Forsythe test											Brown-Forsythe test
	F (DFn, DFd)	2.161 (2, 9)										F (DFn, DFd)	0.07861 (2, 9)
	P value	0.1712										P value	0.925
	P value summary	ns										P value summary	ns
	Are SDs significantly different (P < 0.05)?	No										Are SDs significantly different (P < 0.05)?	No
	Bartlett's test											Bartlett's test
	Bartlett's statistic (corrected)	2.471										Bartlett's statistic (corrected)	0.5743
	P value	0.2906										P value	0.7504
	P value summary	ns										P value summary	ns
	Are SDs significantly different (P < 0.05)?	No										Are SDs significantly different (P < 0.05)?	No
	ANOVA table	SS	DF	MS	F (DFn, DFd)	P value						ANOVA table	SS	DF	MS	F (DFn, DFd)	P value
	Treatment (between columns)	33934	2	16967	F (2, 9) = 192.6	P<0.0001						Treatment (between columns)	57066	2	28533	F (2, 9) = 609.4	P<0.0001
	Residual (within columns)	793	9	88.11								Residual (within columns)	421.4	9	46.82
	Total	34727	11									Total	57487	11
	Data summary											Data summary
	Number of treatments (columns)	3										Number of treatments (columns)	3
	Number of values (total)	12										Number of values (total)	12
	Number of families	1										Number of families	1
	Number of comparisons per family	2										Number of comparisons per family	2
	Alpha	0.05										Alpha	0.05
	Dunnett's multiple comparisons test	Mean Diff.	95.00% CI of diff.	Significant?	Summary	Adjusted P Value	A-?					Dunnett's multiple comparisons test	Mean Diff.	95.00% CI of diff.	Significant?	Summary	Adjusted P Value	A-?
	Slhsl1 Slhsl2 Slhsl3 pH7 + L-DOPA vs. Slhsl1 Slhsl2 Slhsl3 pH10 + L-DOPA	-109.2	-126.5 to -91.82	Yes	****	<0.0001	B	Slhsl1 Slhsl2 Slhsl3 pH10 + L-DOPA				Slhsl1 Slhsl2 Slhsl3 pH7 + L-DOPA vs. Slhsl1 Slhsl2 Slhsl3 pH10 + L-DOPA	-142	-154.6 to -129.3	Yes	****	<0.0001	B	Slhsl1 Slhsl2 Slhsl3 pH10 + L-DOPA
	Slhsl1 Slhsl2 Slhsl3 pH7 + L-DOPA vs. Slhsl1 Slhsl2 Slhsl3 pH10 + L-DOPA + ASA	6.947	-10.40 to 24.30	No	ns	0.4995	C	Slhsl1 Slhsl2 Slhsl3 pH10 + L-DOPA + ASA				Slhsl1 Slhsl2 Slhsl3 pH7 + L-DOPA vs. Slhsl1 Slhsl2 Slhsl3 pH10 + L-DOPA + ASA	8.289	-4.359 to 20.94	No	ns	0.2038	C	Slhsl1 Slhsl2 Slhsl3 pH10 + L-DOPA + ASA
	Test details	Mean 1	Mean 2	Mean Diff.	SE of diff.	n1	n2	q	DF			Test details	Mean 1	Mean 2	Mean Diff.	SE of diff.	n1	n2	q	DF
	Slhsl1 Slhsl2 Slhsl3 pH7 + L-DOPA vs. Slhsl1 Slhsl2 Slhsl3 pH10 + L-DOPA	56.35	165.5	-109.2	6.637	4	4	16.45	9			Slhsl1 Slhsl2 Slhsl3 pH7 + L-DOPA vs. Slhsl1 Slhsl2 Slhsl3 pH10 + L-DOPA	50.08	192	-142	4.838	4	4	29.34	9
	Slhsl1 Slhsl2 Slhsl3 pH7 + L-DOPA vs. Slhsl1 Slhsl2 Slhsl3 pH10 + L-DOPA + ASA	56.35	49.41	6.947	6.637	4	4	1.047	9			Slhsl1 Slhsl2 Slhsl3 pH7 + L-DOPA vs. Slhsl1 Slhsl2 Slhsl3 pH10 + L-DOPA + ASA	50.08	41.79	8.289	4.838	4	4	1.713	9

## Sheet: Fig. 2
Fig. 2B	date
	Proximal	AZ	Distal
	1	2.04995	0.925147
	0.998063	2.28583	0.969642
	0.830338	1.77001	0.643744
	Table Analyzed
	Data sets analyzed	A-C
	ANOVA summary
	F	36.55
	P value	0.0004
	P value summary	***
	Significant diff. among means (P < 0.05)?	Yes
	R squared	0.9241
	Brown-Forsythe test
	F (DFn, DFd)	0.5483 (2, 6)
	P value	0.6044
	P value summary	ns
	Are SDs significantly different (P < 0.05)?	No
	Bartlett's test
	Bartlett's statistic (corrected)
	P value
	P value summary
	Are SDs significantly different (P < 0.05)?
	ANOVA table	SS	DF	MS	F (DFn, DFd)	P value
	Treatment (between columns)	2.617	2	1.308	F (2, 6) = 36.55	P=0.0004
	Residual (within columns)	0.2148	6	0.0358
	Total	2.832	8
	Data summary
	Number of treatments (columns)	3
	Number of values (total)	9
	Number of families	1
	Number of comparisons per family	3
	Alpha	0.05
	Tukey's multiple comparisons test	Mean Diff.	95.00% CI of diff.	Significant?	Summary	Adjusted P Value
	Proximal vs. AZ	-1.092	-1.566 to -0.6185	Yes	***	0.001	A-B
	Proximal vs. Distal	0.09662	-0.3774 to 0.5706	No	ns	0.8121	A-C
	AZ vs. Distal	1.189	0.7151 to 1.663	Yes	***	0.0006	B-C
	Test details	Mean 1	Mean 2	Mean Diff.	SE of diff.	n1	n2	q	DF
	Proximal vs. AZ	0.9428	2.035	-1.092	0.1545	3	3	10	6
	Proximal vs. Distal	0.9428	0.8462	0.09662	0.1545	3	3	0.8845	6
	AZ vs. Distal	2.035	0.8462	1.189	0.1545	3	3	10.89	6
Fig. 2C	date
	0	8	16	24
	0.0102877	0.0246877	0.0334947	0.0550774
	0.011504	0.0222381	0.0345004	0.0606553
	0.00914669	0.0182575	0.0382053	0.0497768
	Table Analyzed
	Data sets analyzed	A-D
	ANOVA summary
	F	93.73
	P value	<0.0001
	P value summary	****
	Significant diff. among means (P < 0.05)?	Yes
	R squared	0.9723
	Brown-Forsythe test
	F (DFn, DFd)	0.9575 (3, 8)
	P value	0.4581
	P value summary	ns
	Are SDs significantly different (P < 0.05)?	No
	Bartlett's test
	Bartlett's statistic (corrected)
	P value
	P value summary
	Are SDs significantly different (P < 0.05)?
	ANOVA table	SS	DF	MS	F (DFn, DFd)	P value
	Treatment (between columns)	0.003351	3	0.001117	F (3, 8) = 93.73	P<0.0001
	Residual (within columns)	9.534e-05	8	1.192e-05
	Total	0.003446	11
	Data summary
	Number of treatments (columns)	4
	Number of values (total)	12
	Number of families	1
	Number of comparisons per family	3
	Alpha	0.05
	Dunnett's multiple comparisons test	Mean Diff.	95.00% CI of diff.	Significant?	Summary	Adjusted P Value	A-?
	0 vs. 8	-0.01141	-0.01953 to -0.003298	Yes	**	0.0094	B	8
	0 vs. 16	-0.02509	-0.03320 to -0.01697	Yes	****	<0.0001	C	16
	0 vs. 24	-0.04486	-0.05297 to -0.03674	Yes	****	<0.0001	D	24
	Test details	Mean 1	Mean 2	Mean Diff.	SE of diff.	n1	n2	q	DF
	0 vs. 8	0.01031	0.02173	-0.01141	0.002819	3	3	4.05	8
	0 vs. 16	0.01031	0.0354	-0.02509	0.002819	3	3	8.901	8
	0 vs. 24	0.01031	0.05517	-0.04486	0.002819	3	3	15.91	8
Fig. 2D	date
	WT	Slhsl1 Slhsl2 Slhsl3	Slidl6	35S:SlIDL6
	1	0.376062	0.409597	2.76526
	0.963714	0.260683	0.334015	2.46657
	1.12878	0.237565	0.401897	2.55992
	Table Analyzed
	Data sets analyzed	A-D
	ANOVA summary
	F	358.3
	P value	<0.0001
	P value summary	****
	Significant diff. among means (P < 0.05)?	Yes
	R squared	0.9926
	Brown-Forsythe test
	F (DFn, DFd)	0.5861 (3, 8)
	P value	0.6409
	P value summary	ns
	Are SDs significantly different (P < 0.05)?	No
	Bartlett's test
	Bartlett's statistic (corrected)
	P value
	P value summary
	Are SDs significantly different (P < 0.05)?
	ANOVA table	SS	DF	MS	F (DFn, DFd)	P value
	Treatment (between columns)	10.24	3	3.414	F (3, 8) = 358.3	P<0.0001
	Residual (within columns)	0.07622	8	0.009527
	Total	10.32	11
	Data summary
	Number of treatments (columns)	4
	Number of values (total)	12
	Number of families	1
	Number of comparisons per family	3
	Alpha	0.05
	Dunnett's multiple comparisons test	Mean Diff.	95.00% CI of diff.	Significant?	Summary	Adjusted P Value	A-?
	WT vs. Slhsl1 Slhsl2 Slhsl3	0.7394	0.5099 to 0.9689	Yes	****	<0.0001	B	Slhsl1 Slhsl2 Slhsl3
	WT vs. Slidl6	0.649	0.4195 to 0.8785	Yes	***	0.0001	C	Slidl6
	WT vs. 35S:SlIDL6	-1.566	-1.796 to -1.337	Yes	****	<0.0001	D	35S:SlIDL6
	Test details	Mean 1	Mean 2	Mean Diff.	SE of diff.	n1	n2	q	DF
	WT vs. Slhsl1 Slhsl2 Slhsl3	1.031	0.2914	0.7394	0.0797	3	3	9.278	8
	WT vs. Slidl6	1.031	0.3818	0.649	0.0797	3	3	8.143	8
	WT vs. 35S:SlIDL6	1.031	2.597	-1.566	0.0797	3	3	19.65	8
Fig. 2E	date
		8	16	24	32
	WT	33.3333	54.5455	93.9394	100
	WT	39.4737	63.1579	86.8421	94.7368
	WT	37.1429	57.1429	88.5714	97.1429
		8	16	24	32
	Slcyp76b23 #3	14.2857	28.5714	42.8571	62.8571
	Slcyp76b23 #3	13.3333	33.3333	56.6667	70
	Slcyp76b23 #3	12	28	52	72
		8h	16h	24h	32h
	Slcyp76b23 #11	12.9032	29.0323	48.3871	67.7419
	Slcyp76b23 #11	8.33333	30.5556	44.4444	52.7778
	Slcyp76b23 #11	11.7647	26.4706	50	61.7647
		8	16	24	32
	SlCYP76B23-OE #1	51.4286	71.4286	97.1429	100
	SlCYP76B23-OE #1	63.3333	86.6667	100	100
	SlCYP76B23-OE #1	68	80	100	100
		8	16	24	32
	SlCYP76B23-OE #7	51.5152	81.8182	100	100
	SlCYP76B23-OE #7	54.2857	71.4286	94.2857	100
	SlCYP76B23-OE #7	57.1429	82.8571	100	100
	Table Analyzed
	Two-way ANOVA	Ordinary
	Alpha	0.05
	Source of Variation	% of total variation	P value	P value summary	Significant?
	Interaction	0.9784	0.0702	ns	No
	Row Factor	36.97	<0.0001	****	Yes
	Column Factor	60.29	<0.0001	****	Yes
	ANOVA table	SS	DF	MS	F (DFn, DFd)	P value
	Interaction	347	8	43.38	F (8, 30) = 2.079	P=0.0702
	Row Factor	13111	2	6555	F (2, 30) = 314.2	P<0.0001
	Column Factor	21384	4	5346	F (4, 30) = 256.2	P<0.0001
	Residual	626	30	20.87
	Data summary
	Number of columns (Column Factor)	5
	Number of rows (Row Factor)	3
	Number of values	45
	Within each row, compare columns (simple effects within rows)
	Number of families	3
	Number of comparisons per family	10
	Alpha	0.05
	Tukey's multiple comparisons test	Mean Diff.	95.00% CI of diff.	Significant?	Summary	Adjusted P Value
	8
	WT vs. Slcyp76b23 #3	23.44	12.63 to 34.26	Yes	****	<0.0001
	WT vs. Slcyp76b23 #11	25.65	14.83 to 36.47	Yes	****	<0.0001
	WT vs. SlCYP76B23-OE #1	-24.27	-35.09 to -13.45	Yes	****	<0.0001
	WT vs. SlCYP76B23-OE #7	-17.66	-28.48 to -6.846	Yes	***	0.0004
	Slcyp76b23 #3 vs. Slcyp76b23 #11	2.206	-8.612 to 13.02	No	ns	0.9753
	Slcyp76b23 #3 vs. SlCYP76B23-OE #1	-47.71	-58.53 to -36.90	Yes	****	<0.0001
	Slcyp76b23 #3 vs. SlCYP76B23-OE #7	-41.11	-51.93 to -30.29	Yes	****	<0.0001
	Slcyp76b23 #11 vs. SlCYP76B23-OE #1	-49.92	-60.74 to -39.10	Yes	****	<0.0001
	Slcyp76b23 #11 vs. SlCYP76B23-OE #7	-43.31	-54.13 to -32.50	Yes	****	<0.0001
	SlCYP76B23-OE #1 vs. SlCYP76B23-OE #7	6.606	-4.212 to 17.42	No	ns	0.4083
	16
	WT vs. Slcyp76b23 #3	28.31	17.50 to 39.13	Yes	****	<0.0001
	WT vs. Slcyp76b23 #11	29.6	18.78 to 40.41	Yes	****	<0.0001
	WT vs. SlCYP76B23-OE #1	-21.08	-31.90 to -10.26	Yes	****	<0.0001
	WT vs. SlCYP76B23-OE #7	-20.42	-31.24 to -9.601	Yes	****	<0.0001
	Slcyp76b23 #3 vs. Slcyp76b23 #11	1.282	-9.536 to 12.10	No	ns	0.9968
	Slcyp76b23 #3 vs. SlCYP76B23-OE #1	-49.4	-60.22 to -38.58	Yes	****	<0.0001
	Slcyp76b23 #3 vs. SlCYP76B23-OE #7	-48.73	-59.55 to -37.91	Yes	****	<0.0001
	Slcyp76b23 #11 vs. SlCYP76B23-OE #1	-50.68	-61.50 to -39.86	Yes	****	<0.0001
	Slcyp76b23 #11 vs. SlCYP76B23-OE #7	-50.02	-60.83 to -39.20	Yes	****	<0.0001
	SlCYP76B23-OE #1 vs. SlCYP76B23-OE #7	0.6638	-10.15 to 11.48	No	ns	0.9998
	24
	WT vs. Slcyp76b23 #3	39.28	28.46 to 50.09	Yes	****	<0.0001
	WT vs. Slcyp76b23 #11	42.17	31.36 to 52.99	Yes	****	<0.0001
	WT vs. SlCYP76B23-OE #1	-9.263	-20.08 to 1.555	No	ns	0.1214
	WT vs. SlCYP76B23-OE #7	-8.311	-19.13 to 2.507	No	ns	0.197
	Slcyp76b23 #3 vs. Slcyp76b23 #11	2.897	-7.921 to 13.72	No	ns	0.9353
	Slcyp76b23 #3 vs. SlCYP76B23-OE #1	-48.54	-59.36 to -37.72	Yes	****	<0.0001
	Slcyp76b23 #3 vs. SlCYP76B23-OE #7	-47.59	-58.41 to -36.77	Yes	****	<0.0001
	Slcyp76b23 #11 vs. SlCYP76B23-OE #1	-51.44	-62.26 to -40.62	Yes	****	<0.0001
	Slcyp76b23 #11 vs. SlCYP76B23-OE #7	-50.48	-61.30 to -39.67	Yes	****	<0.0001
	SlCYP76B23-OE #1 vs. SlCYP76B23-OE #7	0.9524	-9.866 to 11.77	No	ns	0.999
	Test details	Mean 1	Mean 2	Mean Diff.	SE of diff.	N1	N2	q	DF
	8
	WT vs. Slcyp76b23 #3	36.65	13.21	23.44	3.73	3	3	8.889	30
	WT vs. Slcyp76b23 #11	36.65	11	25.65	3.73	3	3	9.726	30
	WT vs. SlCYP76B23-OE #1	36.65	60.92	-24.27	3.73	3	3	9.203	30
	WT vs. SlCYP76B23-OE #7	36.65	54.31	-17.66	3.73	3	3	6.698	30
	Slcyp76b23 #3 vs. Slcyp76b23 #11	13.21	11	2.206	3.73	3	3	0.8364	30
	Slcyp76b23 #3 vs. SlCYP76B23-OE #1	13.21	60.92	-47.71	3.73	3	3	18.09	30
	Slcyp76b23 #3 vs. SlCYP76B23-OE #7	13.21	54.31	-41.11	3.73	3	3	15.59	30
	Slcyp76b23 #11 vs. SlCYP76B23-OE #1	11	60.92	-49.92	3.73	3	3	18.93	30
	Slcyp76b23 #11 vs. SlCYP76B23-OE #7	11	54.31	-43.31	3.73	3	3	16.42	30
	SlCYP76B23-OE #1 vs. SlCYP76B23-OE #7	60.92	54.31	6.606	3.73	3	3	2.505	30
	16
	WT vs. Slcyp76b23 #3	58.28	29.97	28.31	3.73	3	3	10.74	30
	WT vs. Slcyp76b23 #11	58.28	28.69	29.6	3.73	3	3	11.22	30
	WT vs. SlCYP76B23-OE #1	58.28	79.37	-21.08	3.73	3	3	7.994	30
	WT vs. SlCYP76B23-OE #7	58.28	78.7	-20.42	3.73	3	3	7.743	30
	Slcyp76b23 #3 vs. Slcyp76b23 #11	29.97	28.69	1.282	3.73	3	3	0.4862	30
	Slcyp76b23 #3 vs. SlCYP76B23-OE #1	29.97	79.37	-49.4	3.73	3	3	18.73	30
	Slcyp76b23 #3 vs. SlCYP76B23-OE #7	29.97	78.7	-48.73	3.73	3	3	18.48	30
	Slcyp76b23 #11 vs. SlCYP76B23-OE #1	28.69	79.37	-50.68	3.73	3	3	19.22	30
	Slcyp76b23 #11 vs. SlCYP76B23-OE #7	28.69	78.7	-50.02	3.73	3	3	18.96	30
	SlCYP76B23-OE #1 vs. SlCYP76B23-OE #7	79.37	78.7	0.6638	3.73	3	3	0.2517	30
	24
	WT vs. Slcyp76b23 #3	89.78	50.51	39.28	3.73	3	3	14.89	30
	WT vs. Slcyp76b23 #11	89.78	47.61	42.17	3.73	3	3	15.99	30
	WT vs. SlCYP76B23-OE #1	89.78	99.05	-9.263	3.73	3	3	3.512	30
	WT vs. SlCYP76B23-OE #7	89.78	98.1	-8.311	3.73	3	3	3.151	30
	Slcyp76b23 #3 vs. Slcyp76b23 #11	50.51	47.61	2.897	3.73	3	3	1.099	30
	Slcyp76b23 #3 vs. SlCYP76B23-OE #1	50.51	99.05	-48.54	3.73	3	3	18.41	30
	Slcyp76b23 #3 vs. SlCYP76B23-OE #7	50.51	98.1	-47.59	3.73	3	3	18.04	30
	Slcyp76b23 #11 vs. SlCYP76B23-OE #1	47.61	99.05	-51.44	3.73	3	3	19.5	30
	Slcyp76b23 #11 vs. SlCYP76B23-OE #7	47.61	98.1	-50.48	3.73	3	3	19.14	30
	SlCYP76B23-OE #1 vs. SlCYP76B23-OE #7	99.05	98.1	0.9524	3.73	3	3	0.3611	30
Fig. 2G	date
	WT	Slcyp76b23 #3	Slcyp76b23 #11	SlCYP76B23-OE #1	SlCYP76B23-OE #7
	143.28	11.21	8.51	678.28	519.84
	151.86	8.85	6.14	643.85	619.66
	121.42	11.07	10.98	692.68	550.24
	Table Analyzed
	Two-way ANOVA	Ordinary
	Alpha	0.05
	Source of Variation	% of total variation	P value	P value summary	Significant?
	Row Factor	0.0407	0.7476	ns	No
	Column Factor	99.42	<0.0001	****	Yes
	ANOVA table	SS	DF	MS	F (DFn, DFd)	P value
	Row Factor	491.1	2	245.5	F (2, 8) = 0.3017	P=0.7476
	Column Factor	1199636	4	299909	F (4, 8) = 368.5	P<0.0001
	Residual	6512	8	814
	Data summary
	Number of columns (Column Factor)	5
	Number of rows (Row Factor)	3
	Number of values	15
	Compare column means (main column effect)
	Number of families	1
	Number of comparisons per family	10
	Alpha	0.05
	Tukey's multiple comparisons test	Mean Diff.	95.00% CI of diff.	Significant?	Summary	Adjusted P Value
	WT vs. Slcyp76b23 #3	128.5	48.00 to 209.0	Yes	**	0.0037
	WT vs. Slcyp76b23 #11	130.3	49.83 to 210.8	Yes	**	0.0034
	WT vs. SlCYP76B23-OE #1	-532.8	-613.2 to -452.3	Yes	****	<0.0001
	WT vs. SlCYP76B23-OE #7	-424.4	-504.9 to -343.9	Yes	****	<0.0001
	Slcyp76b23 #3 vs. Slcyp76b23 #11	1.833	-78.64 to 82.31	No	ns	>0.9999
	Slcyp76b23 #3 vs. SlCYP76B23-OE #1	-661.2	-741.7 to -580.7	Yes	****	<0.0001
	Slcyp76b23 #3 vs. SlCYP76B23-OE #7	-552.9	-633.3 to -472.4	Yes	****	<0.0001
	Slcyp76b23 #11 vs. SlCYP76B23-OE #1	-663.1	-743.5 to -582.6	Yes	****	<0.0001
	Slcyp76b23 #11 vs. SlCYP76B23-OE #7	-554.7	-635.2 to -474.2	Yes	****	<0.0001
	SlCYP76B23-OE #1 vs. SlCYP76B23-OE #7	108.4	27.88 to 188.8	Yes	*	0.0104
	Test details	Mean 1	Mean 2	Mean Diff.	SE of diff.	N1	N2	q	DF
	WT vs. Slcyp76b23 #3	138.9	10.38	128.5	23.29	3	3	7.8	8
	WT vs. Slcyp76b23 #11	138.9	8.543	130.3	23.29	3	3	7.911	8
	WT vs. SlCYP76B23-OE #1	138.9	671.6	-532.8	23.29	3	3	32.34	8
	WT vs. SlCYP76B23-OE #7	138.9	563.2	-424.4	23.29	3	3	25.76	8
	Slcyp76b23 #3 vs. Slcyp76b23 #11	10.38	8.543	1.833	23.29	3	3	0.1113	8
	Slcyp76b23 #3 vs. SlCYP76B23-OE #1	10.38	671.6	-661.2	23.29	3	3	40.14	8
	Slcyp76b23 #3 vs. SlCYP76B23-OE #7	10.38	563.2	-552.9	23.29	3	3	33.56	8
	Slcyp76b23 #11 vs. SlCYP76B23-OE #1	8.543	671.6	-663.1	23.29	3	3	40.25	8
	Slcyp76b23 #11 vs. SlCYP76B23-OE #7	8.543	563.2	-554.7	23.29	3	3	33.68	8
	SlCYP76B23-OE #1 vs. SlCYP76B23-OE #7	671.6	563.2	108.4	23.29	3	3	6.578	8
Fig. 2H	date
	WT	repeat-1	repeat-2	repeat-3	repeat-4	repeat-5	repeat-6
	8h	33.3333	39.4737	37.1429	34.375	38.4615	34.2857
	16h	54.5455	63.1579	57.1429	56.25	61.5385	51.4286
	24h	81.8182	86.8421	88.5714	84.375	84.6154	88.5714
	32h	100	94.7368	97.1429	100	97.4359	100
	Time to 50% abscssion rate (h)	13.629	10.9444	12.0899	13.0135	11.5203	13.3932
	Slcyp76b23	repeat-1	repeat-2	repeat-3	repeat-4	repeat-5	repeat-6
	8h	17.1429	20	18.75	16.6667	17.6471	18.1818
	16h	31.4286	36.6667	37.5	30.5556	32.3529	36.3636
	24h	51.4286	50	46.875	50	44.1176	51.5152
	32h	60	63.3333	56.25	63.8889	55.8824	60.6061
	Time to 50% abscssion rate (h)	24.6666	23.7514	25.7143	24.7588	27.8185	23.3963
	Slcyp76b23 L-DOPA	repeat-1	repeat-2	repeat-3	repeat-4	repeat-5	repeat-6
	8h	37.1429	29.0323	33.3333	32.4324	36.3636	30.303
	16h	51.4286	51.6129	54.5455	54.0541	54.5455	45.4545
	24h	82.8571	77.4194	78.7879	86.4865	81.8182	78.7879
	32h	100	100	93.9394	100	93.9394	93.9394
	Time to 50% abscssion rate (h)	13.3682	15.0226	13.6762	13.4207	12.9591	15.5442
	Table Analyzed
	Data sets analyzed	A-C
	ANOVA summary
	F	176.7
	P value	<0.0001
	P value summary	****
	Significant diff. among means (P < 0.05)?	Yes
	R squared	0.9593
	Brown-Forsythe test
	F (DFn, DFd)	0.2349 (2, 15)
	P value	0.7935
	P value summary	ns
	Are SDs significantly different (P < 0.05)?	No
	Bartlett's test
	Bartlett's statistic (corrected)	1.114
	P value	0.5729
	P value summary	ns
	Are SDs significantly different (P < 0.05)?	No
	ANOVA table	SS	DF	MS	F (DFn, DFd)	P value
	Treatment (between columns)	564.6	2	282.3	F (2, 15) = 176.7	P<0.0001
	Residual (within columns)	23.96	15	1.597
	Total	588.5	17
	Data summary
	Number of treatments (columns)	3
	Number of values (total)	18
	Number of families	1
	Number of comparisons per family	3
	Alpha	0.05
	Tukey's multiple comparisons test	Mean Diff.	95.00% CI of diff.	Significant?	Summary	Adjusted P Value
	WT vs. Slcyp76b23	-12.59	-14.48 to -10.69	Yes	****	<0.0001	A-B
	WT vs. Slcyp76b23 L-DOPA	-1.567	-3.462 to 0.3286	No	ns	0.1137	A-C
	Slcyp76b23 vs. Slcyp76b23 L-DOPA	11.02	9.124 to 12.91	Yes	****	<0.0001	B-C
	Test details	Mean 1	Mean 2	Mean Diff.	SE of diff.	n1	n2	q	DF
	WT vs. Slcyp76b23	12.43	25.02	-12.59	0.7297	6	6	24.39	15
	WT vs. Slcyp76b23 L-DOPA	12.43	14	-1.567	0.7297	6	6	3.037	15
	Slcyp76b23 vs. Slcyp76b23 L-DOPA	25.02	14	11.02	0.7297	6	6	21.36	15
Fig. 2I	date
	Slcyp76b23	repeat-1	repeat-2	repeat-3	repeat-4	repeat-5	repeat-6
	8	15.625	20.5882	17.1429	12.5	19.4444	17.6471
	16	37.5	32.3529	34.2857	34.375	30.5556	35.2941
	24	56.25	47.0588	51.4286	50	47.2222	52.9412
	32	68.75	61.7647	62.8571	62.5	58.3333	64.7059
	Time to 50% abscssion rate (h)	21.1051	25.3521	23.6612	23.6222	26.5376	22.8593
	SlCYP76B23 SlIDL6	repeat-1	repeat-2	repeat-3	repeat-4	repeat-5	repeat-6
	8	24.2424	18.1818	21.2121	27.2727	15.1515	17.6471
	16	37.1429	34.2857	37.1429	48.5714	31.4286	44.1176
	24	52.7778	50	47.2222	52.7778	47.2222	52.9412
	32	63.8889	66.6667	66.6667	69.4444	61.1111	64.7059
	Time to 50% abscssion rate (h)	22.7896	23.7554	23.5512	19.2228	25.5946	19.9569
	SlCYP76B23-OE	repeat-1	repeat-2	repeat-3	repeat-4	repeat-5	repeat-6
	8	52.9412	46.6667	56.6667	54.5455	50	54.8387
	16	73.5294	66.6667	66.6667	75.7576	66.6667	64.5161
	24	100	93.3333	83.3333	96.9697	93.3333	96.7742
	32	100	100	100	100	100	100
	Time to 50% abscssion rate (h)	7.60671	9.20842	7.0874	7.1332	8.39263	7.45389
	SlCYP76B23-OE SlIDL6	repeat-1	repeat-2	repeat-3	repeat-4	repeat-5	repeat-6
	8	65.7143	73.3333	75.7576	62.8571	76.6667	70.5882
	16	85.7143	90	93.9394	82.8571	96.6667	94.1176
	24	100	100	100	97.1429	100	100
	32	100	100	100	100	100	100
	Time to 50% abscssion rate (h)	5.24889	4.1013	4.64575	5.42753	5.35358	5.67886
	Table Analyzed
	Data sets analyzed	A-D
	ANOVA summary
	F	215.4
	P value	<0.0001
	P value summary	****
	Significant diff. among means (P < 0.05)?	Yes
	R squared	0.97
	Brown-Forsythe test
	F (DFn, DFd)	2.235 (3, 20)
	P value	0.1156
	P value summary	ns
	Are SDs significantly different (P < 0.05)?	No
	Bartlett's test
	Bartlett's statistic (corrected)	10.41
	P value	0.0154
	P value summary	*
	Are SDs significantly different (P < 0.05)?	Yes
	ANOVA table	SS	DF	MS	F (DFn, DFd)	P value
	Treatment (between columns)	1706	3	568.7	F (3, 20) = 215.4	P<0.0001
	Residual (within columns)	52.8	20	2.64
	Total	1759	23
	Data summary
	Number of treatments (columns)	4
	Number of values (total)	24
	Number of families	1
	Number of comparisons per family	6
	Alpha	0.05
	Tukey's multiple comparisons test	Mean Diff.	95.00% CI of diff.	Significant?	Summary	Adjusted P Value
	Slcyp76b23 vs. SlCYP76B23 SlIDL6	1.378	-1.248 to 4.003	No	ns	0.4738	A-B
	Slcyp76b23 vs. SlCYP76B23-OE	16.04	13.42 to 18.67	Yes	****	<0.0001	A-C
	Slcyp76b23 vs. SlCYP76B23-OE SlIDL6	18.78	16.15 to 21.41	Yes	****	<0.0001	A-D
	SlCYP76B23 SlIDL6 vs. SlCYP76B23-OE	14.66	12.04 to 17.29	Yes	****	<0.0001	B-C
	SlCYP76B23 SlIDL6 vs. SlCYP76B23-OE SlIDL6	17.4	14.78 to 20.03	Yes	****	<0.0001	B-D
	SlCYP76B23-OE vs. SlCYP76B23-OE SlIDL6	2.738	0.1121 to 5.363	Yes	*	0.0391	C-D
	Test details	Mean 1	Mean 2	Mean Diff.	SE of diff.	n1	n2	q	DF
	Slcyp76b23 vs. SlCYP76B23 SlIDL6	23.86	22.48	1.378	0.9381	6	6	2.077	20
	Slcyp76b23 vs. SlCYP76B23-OE	23.86	7.814	16.04	0.9381	6	6	24.18	20
	Slcyp76b23 vs. SlCYP76B23-OE SlIDL6	23.86	5.076	18.78	0.9381	6	6	28.31	20
	SlCYP76B23 SlIDL6 vs. SlCYP76B23-OE	22.48	7.814	14.66	0.9381	6	6	22.11	20
	SlCYP76B23 SlIDL6 vs. SlCYP76B23-OE SlIDL6	22.48	5.076	17.4	0.9381	6	6	26.23	20
	SlCYP76B23-OE vs. SlCYP76B23-OE SlIDL6	7.814	5.076	2.738	0.9381	6	6	4.127	20

## Sheet: Fig. 3
Fig. 3D	date
	AR			AUR
	WT	Slcyp76b23		WT	Slcyp76b23
	119.448	41.908		87.579	40.875
	116.126	46.881		91.94	40.471
	109.595	48.267		83.974	30.901
	127.482	36.69		83.747	31.676
	Table Analyzed			Table Analyzed
	Column B	Slcyp76b23		Column B	Slcyp76b23
	vs.	vs.		vs.	vs.
	Column A	WT		Column A	WT
	Unpaired t test			Unpaired t test
	P value	<0.0001		P value	<0.0001
	P value summary	****		P value summary	****
	Significantly different (P < 0.05)?	Yes		Significantly different (P < 0.05)?	Yes
	One- or two-tailed P value?	Two-tailed		One- or two-tailed P value?	Two-tailed
	t, df	t=16.40, df=6		t, df	t=15.28, df=6
	How big is the difference?			How big is the difference?
	Mean of column A	118.2		Mean of column A	86.81
	Mean of column B	43.44		Mean of column B	35.98
	Difference between means (B - A) ± SEM	-74.73 ± 4.556		Difference between means (B - A) ± SEM	-50.83 ± 3.326
	95% confidence interval	-85.87 to -63.58		95% confidence interval	-58.97 to -42.69
	R squared (eta squared)	0.9782		R squared (eta squared)	0.9749
	F test to compare variances			F test to compare variances
	F, DFn, Dfd	1.999, 3, 3		F, DFn, Dfd	1.995, 3, 3
	P value	0.5837		P value	0.5849
	P value summary	ns		P value summary	ns
	Significantly different (P < 0.05)?	No		Significantly different (P < 0.05)?	No
	Data analyzed			Data analyzed
	Sample size, column A	4		Sample size, column A	4
	Sample size, column B	4		Sample size, column B	4
Fig. 3F	date
	AR			AUR
	CK	L-DOPA		CK	L-DOPA
	109.585	346.548		76.48	318.289
	111.664	342.729		79.918	325.329
	99.916	339.652		94.418	314.238
	98.599	347.279		85.186	326.073
	Table Analyzed			Table Analyzed
	Column B	L-DOPA		Column B	L-DOPA
	vs.	vs.		vs.	vs.
	Column A	CK		Column A	CK
	Unpaired t test			Unpaired t test
	P value	<0.0001		P value	<0.0001
	P value summary	****		P value summary	****
	Significantly different (P < 0.05)?	Yes		Significantly different (P < 0.05)?	Yes
	One- or two-tailed P value?	Two-tailed		One- or two-tailed P value?	Two-tailed
	t, df	t=63.53, df=6		t, df	t=49.00, df=6
	How big is the difference?			How big is the difference?
	Mean of column A	104.9		Mean of column A	84
	Mean of column B	344.1		Mean of column B	321
	Difference between means (B - A) ± SEM	239.1 ± 3.764		Difference between means (B - A) ± SEM	237.0 ± 4.837
	95% confidence interval	229.9 to 248.3		95% confidence interval	225.1 to 248.8
	R squared (eta squared)	0.9985		R squared (eta squared)	0.9975
	F test to compare variances			F test to compare variances
	F, DFn, Dfd	3.503, 3, 3		F, DFn, Dfd	1.878, 3, 3
	P value	0.3307		P value	0.6178
	P value summary	ns		P value summary	ns
	Significantly different (P < 0.05)?	No		Significantly different (P < 0.05)?	No
	Data analyzed			Data analyzed
	Sample size, column A	4		Sample size, column A	4
	Sample size, column B	4		Sample size, column B	4

## Sheet: Fig. 4
Fig. 4D	date
		igG			FLAG
	S0	0.0168241	0.0221263	0.0252924	0.0168666	0.0133699	0.0160492
	S1	0.0181291	0.0202956	0.0184149	0.0921794	0.0904969	0.0826664
	S2	0.0143587	0.0236514	0.0204476	0.126576	0.131951	0.109429
	Table Analyzed
	Two-way ANOVA	Ordinary
	Alpha	0.05
	Source of Variation	% of total variation	P value	P value summary	Significant?
	Interaction	29	<0.0001	****	Yes
	Row Factor	26.72	<0.0001	****	Yes
	Column Factor	42.98	<0.0001	****	Yes
	ANOVA table	SS	DF	MS	F (DFn, DFd)	P value
	Interaction	0.009373	2	0.004686	F (2, 12) = 134.3	P<0.0001
	Row Factor	0.008636	2	0.004318	F (2, 12) = 123.7	P<0.0001
	Column Factor	0.01389	1	0.01389	F (1, 12) = 397.9	P<0.0001
	Residual	0.0004189	12	3.491e-05
	Difference between column means
	Mean of igG	0.01995
	Mean of FLAG	0.07551
	Difference between means	-0.05556
	SE of difference	0.002785
	95% CI of difference	-0.06163 to -0.04949
	Data summary
	Number of columns (Column Factor)	2
	Number of rows (Row Factor)	3
	Number of values	18
	Compare each cell mean with the other cell mean in that row
	Number of families	1
	Number of comparisons per family	3
	Alpha	0.05
	Sidak's multiple comparisons test	Mean Diff.	95.00% CI of diff.	Significant?	Summary	Adjusted P Value
	igG - FLAG
	S0	0.005986	-0.007378 to 0.01935	No	ns	0.5582
	S1	-0.0695	-0.08287 to -0.05614	Yes	****	<0.0001
	S2	-0.1032	-0.1165 to -0.08980	Yes	****	<0.0001
	Test details	Mean 1	Mean 2	Mean Diff.	SE of diff.	N1	N2	t	DF
	igG - FLAG
	S0	0.02141	0.01543	0.005986	0.004824	3	3	1.241	12
	S1	0.01895	0.08845	-0.0695	0.004824	3	3	14.41	12
	S2	0.01949	0.1227	-0.1032	0.004824	3	3	21.39	12
Fig. 4E	date
	proSlCYP76B23:LUC + Empty vector	proSlCYP76B23:LUC + SlWRKY73
	1	2.10369
	1.01208	2.06268
	0.855254	2.41048
	Table Analyzed
	Column B	proSlCYP76B23:LUC + SlWRKY73
	vs.	vs.
	Column A	proSlCYP76B23:LUC + Empty vector
	Unpaired t test
	P value	0.0005
	P value summary	***
	Significantly different (P < 0.05)?	Yes
	One- or two-tailed P value?	Two-tailed
	t, df	t=10.24, df=4
	How big is the difference?
	Mean of column A	0.9558
	Mean of column B	2.192
	Difference between means (B - A) ± SEM	1.237 ± 0.1208
	95% confidence interval	0.9012 to 1.572
	R squared (eta squared)	0.9633
	F test to compare variances
	F, DFn, Dfd	4.744, 2, 2
	P value	0.3482
	P value summary	ns
	Significantly different (P < 0.05)?	No
	Data analyzed
	Sample size, column A	3
	Sample size, column B	3

## Sheet: Fig. 5
Fig. 5A	date
	Proximal	AZ	Distal
	1	3.63739	1.48951
	1.14481	4.27092	1.3105
	1.16188	3.56372	1.19363
	Table Analyzed
	Data sets analyzed	A-C
	ANOVA summary
	F	113.2
	P value	<0.0001
	P value summary	****
	Significant diff. among means (P < 0.05)?	Yes
	R squared	0.9742
	Brown-Forsythe test
	F (DFn, DFd)	0.6001 (2, 6)
	P value	0.5786
	P value summary	ns
	Are SDs significantly different (P < 0.05)?	No
	Bartlett's test
	Bartlett's statistic (corrected)
	P value
	P value summary
	Are SDs significantly different (P < 0.05)?
	ANOVA table	SS	DF	MS	F (DFn, DFd)	P value
	Treatment (between columns)	13.67	2	6.837	F (2, 6) = 113.2	P<0.0001
	Residual (within columns)	0.3625	6	0.06042
	Total	14.04	8
	Data summary
	Number of treatments (columns)	3
	Number of values (total)	9
	Number of families	1
	Number of comparisons per family	3
	Alpha	0.05
	Tukey's multiple comparisons test	Mean Diff.	95.00% CI of diff.	Significant?	Summary	Adjusted P Value
	Proximal vs. AZ	-2.722	-3.338 to -2.106	Yes	****	<0.0001	A-B
	Proximal vs. Distal	-0.229	-0.8448 to 0.3868	No	ns	0.5264	A-C
	AZ vs. Distal	2.493	1.877 to 3.109	Yes	****	<0.0001	B-C
	Test details	Mean 1	Mean 2	Mean Diff.	SE of diff.	n1	n2	q	DF
	Proximal vs. AZ	1.102	3.824	-2.722	0.2007	3	3	19.18	6
	Proximal vs. Distal	1.102	1.331	-0.229	0.2007	3	3	1.613	6
	AZ vs. Distal	3.824	1.331	2.493	0.2007	3	3	17.56	6
Fig. 5B	date
	0	8	16	24
	0.00278461	0.132127	0.172004	0.362561
	0.00250527	0.0960547	0.19395	0.293391
	0.00306132	0.0890031	0.251862	0.304995
	Table Analyzed
	Data sets analyzed	A-D
	ANOVA summary
	F	61.47
	P value	<0.0001
	P value summary	****
	Significant diff. among means (P < 0.05)?	Yes
	R squared	0.9584
	Brown-Forsythe test
	F (DFn, DFd)	0.7736 (3, 8)
	P value	0.5406
	P value summary	ns
	Are SDs significantly different (P < 0.05)?	No
	Bartlett's test
	Bartlett's statistic (corrected)
	P value
	P value summary
	Are SDs significantly different (P < 0.05)?
	ANOVA table	SS	DF	MS	F (DFn, DFd)	P value
	Treatment (between columns)	0.1664	3	0.05547	F (3, 8) = 61.47	P<0.0001
	Residual (within columns)	0.007219	8	0.0009024
	Total	0.1736	11
	Data summary
	Number of treatments (columns)	4
	Number of values (total)	12
	Number of families	1
	Number of comparisons per family	3
	Alpha	0.05
	Dunnett's multiple comparisons test	Mean Diff.	95.00% CI of diff.	Significant?	Summary	Adjusted P Value	A-?
	0 vs. 8	-0.1029	-0.1736 to -0.03231	Yes	**	0.0077	B	8
	0 vs. 16	-0.2032	-0.2738 to -0.1325	Yes	***	0.0001	C	16
	0 vs. 24	-0.3175	-0.3882 to -0.2469	Yes	****	<0.0001	D	24
	Test details	Mean 1	Mean 2	Mean Diff.	SE of diff.	n1	n2	q	DF
	0 vs. 8	0.002784	0.1057	-0.1029	0.02453	3	3	4.197	8
	0 vs. 16	0.002784	0.2059	-0.2032	0.02453	3	3	8.283	8
	0 vs. 24	0.002784	0.3203	-0.3175	0.02453	3	3	12.95	8
Fig. 5C	date
	WT	Slhsl1 Slhsl2 Slhsl3	Slidl6	35S:SlIDL6
	1	0.335977	0.454451	2.12489
	1.17554	0.300598	0.389466	1.99653
	1.05771	0.244355	0.339712	1.86937
	Table Analyzed
	Data sets analyzed	A-D
	ANOVA summary
	F	248.7
	P value	<0.0001
	P value summary	****
	Significant diff. among means (P < 0.05)?	Yes
	R squared	0.9894
	Brown-Forsythe test
	F (DFn, DFd)	0.6574 (3, 8)
	P value	0.6007
	P value summary	ns
	Are SDs significantly different (P < 0.05)?	No
	Bartlett's test
	Bartlett's statistic (corrected)
	P value
	P value summary
	Are SDs significantly different (P < 0.05)?
	ANOVA table	SS	DF	MS	F (DFn, DFd)	P value
	Treatment (between columns)	5.554	3	1.851	F (3, 8) = 248.7	P<0.0001
	Residual (within columns)	0.05955	8	0.007443
	Total	5.614	11
	Data summary
	Number of treatments (columns)	4
	Number of values (total)	12
	Number of families	1
	Number of comparisons per family	6
	Alpha	0.05
	Tukey's multiple comparisons test	Mean Diff.	95.00% CI of diff.	Significant?	Summary	Adjusted P Value
	WT vs. Slhsl1 Slhsl2 Slhsl3	0.7841	0.5585 to 1.010	Yes	****	<0.0001	A-B
	WT vs. Slidl6	0.6832	0.4576 to 0.9088	Yes	****	<0.0001	A-C
	WT vs. 35S:SlIDL6	-0.9192	-1.145 to -0.6936	Yes	****	<0.0001	A-D
	Slhsl1 Slhsl2 Slhsl3 vs. Slidl6	-0.1009	-0.3265 to 0.1247	No	ns	0.5155	B-C
	Slhsl1 Slhsl2 Slhsl3 vs. 35S:SlIDL6	-1.703	-1.929 to -1.478	Yes	****	<0.0001	B-D
	Slidl6 vs. 35S:SlIDL6	-1.602	-1.828 to -1.377	Yes	****	<0.0001	C-D
	Test details	Mean 1	Mean 2	Mean Diff.	SE of diff.	n1	n2	q	DF
	WT vs. Slhsl1 Slhsl2 Slhsl3	1.078	0.2936	0.7841	0.07044	3	3	15.74	8
	WT vs. Slidl6	1.078	0.3945	0.6832	0.07044	3	3	13.72	8
	WT vs. 35S:SlIDL6	1.078	1.997	-0.9192	0.07044	3	3	18.45	8
	Slhsl1 Slhsl2 Slhsl3 vs. Slidl6	0.2936	0.3945	-0.1009	0.07044	3	3	2.026	8
	Slhsl1 Slhsl2 Slhsl3 vs. 35S:SlIDL6	0.2936	1.997	-1.703	0.07044	3	3	34.2	8
	Slidl6 vs. 35S:SlIDL6	0.3945	1.997	-1.602	0.07044	3	3	32.17	8
Fig. 5D	date
		WT			Slwrky73 #8			Slwrky73 #15			WRKY73-OE #3			WRKY73-OE #13
	8	35.2941	38.7097	30.7692	23.5294	19.3548	17.9487	17.6471	22.5806	15.3846	60	50	65	50	43.75	46.4286
	16	64.7059	67.7419	56.4103	35.2941	41.9355	35.8974	32.3529	38.7097	33.3333	100	87.5	90	90	81.25	82.1429
	24	91.1765	87.0968	89.7436	47.0588	51.6129	46.1538	52.9412	61.2903	48.7179	100	100	95	100	100	96.4286
	Table Analyzed
	Two-way ANOVA	Ordinary
	Alpha	0.05
	Source of Variation	% of total variation	P value	P value summary	Significant?
	Interaction	3.377	<0.0001	****	Yes
	Row Factor	40.88	<0.0001	****	Yes
	Column Factor	53.94	<0.0001	****	Yes
	ANOVA table	SS	DF	MS	F (DFn, DFd)	P value
	Interaction	1122	8	140.3	F (8, 30) = 7.041	P<0.0001
	Row Factor	13589	2	6795	F (2, 30) = 341.0	P<0.0001
	Column Factor	17930	4	4482	F (4, 30) = 224.9	P<0.0001
	Residual	597.8	30	19.93
	Data summary
	Number of columns (Column Factor)	5
	Number of rows (Row Factor)	3
	Number of values	45
	Within each row, compare columns (simple effects within rows)
	Number of families	3
	Number of comparisons per family	10
	Alpha	0.05
	Tukey's multiple comparisons test	Mean Diff.	95.00% CI of diff.	Significant?	Summary	Adjusted P Value
	8
	WT vs. Slwrky73 #8	14.65	4.075 to 25.22	Yes	**	0.0031
	WT vs. Slwrky73 #15	16.39	5.815 to 26.96	Yes	***	0.0009
	WT vs. WRKY73-OE #3	-23.41	-33.98 to -12.84	Yes	****	<0.0001
	WT vs. WRKY73-OE #13	-11.8	-22.37 to -1.230	Yes	*	0.0227
	Slwrky73 #8 vs. Slwrky73 #15	1.74	-8.832 to 12.31	No	ns	0.9888
	Slwrky73 #8 vs. WRKY73-OE #3	-38.06	-48.63 to -27.48	Yes	****	<0.0001
	Slwrky73 #8 vs. WRKY73-OE #13	-26.45	-37.02 to -15.88	Yes	****	<0.0001
	Slwrky73 #15 vs. WRKY73-OE #3	-39.8	-50.37 to -29.22	Yes	****	<0.0001
	Slwrky73 #15 vs. WRKY73-OE #13	-28.19	-38.76 to -17.62	Yes	****	<0.0001
	WRKY73-OE #3 vs. WRKY73-OE #13	11.61	1.035 to 22.18	Yes	*	0.0258
	16
	WT vs. Slwrky73 #8	25.24	14.67 to 35.82	Yes	****	<0.0001
	WT vs. Slwrky73 #15	28.15	17.58 to 38.73	Yes	****	<0.0001
	WT vs. WRKY73-OE #3	-29.55	-40.12 to -18.98	Yes	****	<0.0001
	WT vs. WRKY73-OE #13	-21.51	-32.08 to -10.94	Yes	****	<0.0001
	Slwrky73 #8 vs. Slwrky73 #15	2.91	-7.662 to 13.48	No	ns	0.929
	Slwrky73 #8 vs. WRKY73-OE #3	-54.79	-65.36 to -44.22	Yes	****	<0.0001
	Slwrky73 #8 vs. WRKY73-OE #13	-46.76	-57.33 to -36.18	Yes	****	<0.0001
	Slwrky73 #15 vs. WRKY73-OE #3	-57.7	-68.27 to -47.13	Yes	****	<0.0001
	Slwrky73 #15 vs. WRKY73-OE #13	-49.67	-60.24 to -39.09	Yes	****	<0.0001
	WRKY73-OE #3 vs. WRKY73-OE #13	8.036	-2.536 to 18.61	No	ns	0.2055
	24
	WT vs. Slwrky73 #8	41.06	30.49 to 51.64	Yes	****	<0.0001
	WT vs. Slwrky73 #15	35.02	24.45 to 45.59	Yes	****	<0.0001
	WT vs. WRKY73-OE #3	-8.994	-19.57 to 1.578	No	ns	0.1253
	WT vs. WRKY73-OE #13	-9.471	-20.04 to 1.101	No	ns	0.0962
	Slwrky73 #8 vs. Slwrky73 #15	-6.041	-16.61 to 4.531	No	ns	0.4742
	Slwrky73 #8 vs. WRKY73-OE #3	-50.06	-60.63 to -39.49	Yes	****	<0.0001
	Slwrky73 #8 vs. WRKY73-OE #13	-50.53	-61.11 to -39.96	Yes	****	<0.0001
	Slwrky73 #15 vs. WRKY73-OE #3	-44.02	-54.59 to -33.44	Yes	****	<0.0001
	Slwrky73 #15 vs. WRKY73-OE #13	-44.49	-55.07 to -33.92	Yes	****	<0.0001
	WRKY73-OE #3 vs. WRKY73-OE #13	-0.4762	-11.05 to 10.10	No	ns	>0.9999
	Test details	Mean 1	Mean 2	Mean Diff.	SE of diff.	N1	N2	q	DF
	8
	WT vs. Slwrky73 #8	34.92	20.28	14.65	3.645	3	3	5.683	30
	WT vs. Slwrky73 #15	34.92	18.54	16.39	3.645	3	3	6.358	30
	WT vs. WRKY73-OE #3	34.92	58.33	-23.41	3.645	3	3	9.083	30
	WT vs. WRKY73-OE #13	34.92	46.73	-11.8	3.645	3	3	4.579	30
	Slwrky73 #8 vs. Slwrky73 #15	20.28	18.54	1.74	3.645	3	3	0.6752	30
	Slwrky73 #8 vs. WRKY73-OE #3	20.28	58.33	-38.06	3.645	3	3	14.77	30
	Slwrky73 #8 vs. WRKY73-OE #13	20.28	46.73	-26.45	3.645	3	3	10.26	30
	Slwrky73 #15 vs. WRKY73-OE #3	18.54	58.33	-39.8	3.645	3	3	15.44	30
	Slwrky73 #15 vs. WRKY73-OE #13	18.54	46.73	-28.19	3.645	3	3	10.94	30
	WRKY73-OE #3 vs. WRKY73-OE #13	58.33	46.73	11.61	3.645	3	3	4.504	30
	16
	WT vs. Slwrky73 #8	62.95	37.71	25.24	3.645	3	3	9.795	30
	WT vs. Slwrky73 #15	62.95	34.8	28.15	3.645	3	3	10.92	30
	WT vs. WRKY73-OE #3	62.95	92.5	-29.55	3.645	3	3	11.46	30
	WT vs. WRKY73-OE #13	62.95	84.46	-21.51	3.645	3	3	8.347	30
	Slwrky73 #8 vs. Slwrky73 #15	37.71	34.8	2.91	3.645	3	3	1.129	30
	Slwrky73 #8 vs. WRKY73-OE #3	37.71	92.5	-54.79	3.645	3	3	21.26	30
	Slwrky73 #8 vs. WRKY73-OE #13	37.71	84.46	-46.76	3.645	3	3	18.14	30
	Slwrky73 #15 vs. WRKY73-OE #3	34.8	92.5	-57.7	3.645	3	3	22.39	30
	Slwrky73 #15 vs. WRKY73-OE #13	34.8	84.46	-49.67	3.645	3	3	19.27	30
	WRKY73-OE #3 vs. WRKY73-OE #13	92.5	84.46	8.036	3.645	3	3	3.118	30
	24
	WT vs. Slwrky73 #8	89.34	48.28	41.06	3.645	3	3	15.93	30
	WT vs. Slwrky73 #15	89.34	54.32	35.02	3.645	3	3	13.59	30
	WT vs. WRKY73-OE #3	89.34	98.33	-8.994	3.645	3	3	3.49	30
	WT vs. WRKY73-OE #13	89.34	98.81	-9.471	3.645	3	3	3.675	30
	Slwrky73 #8 vs. Slwrky73 #15	48.28	54.32	-6.041	3.645	3	3	2.344	30
	Slwrky73 #8 vs. WRKY73-OE #3	48.28	98.33	-50.06	3.645	3	3	19.42	30
	Slwrky73 #8 vs. WRKY73-OE #13	48.28	98.81	-50.53	3.645	3	3	19.61	30
	Slwrky73 #15 vs. WRKY73-OE #3	54.32	98.33	-44.02	3.645	3	3	17.08	30
	Slwrky73 #15 vs. WRKY73-OE #13	54.32	98.81	-44.49	3.645	3	3	17.26	30
	WRKY73-OE #3 vs. WRKY73-OE #13	98.33	98.81	-0.4762	3.645	3	3	0.1848	30
Fig. 5E	date
	Slwrky73	repeat-1	repeat-2	repeat-3	repeat-4	repeat-5	repeat-6
	8	23.3333	19.4444	18.9189	20	13.8889	19.4444
	16	40	36.1111	40.5405	40	38.8889	41.6667
	24	56.6667	55.5556	59.4595	51.4286	52.7778	61.1111
	Time to 50% abscssion rate (h)	20.6963	21.7165	19.8286	22.7022	21.8281	19.263
	Slwrky73 SlIDL6	repeat-1	repeat-2	repeat-3	repeat-4	repeat-5	repeat-6
	8	23.3333	19.4444	24.3243	23.3333	16.6667	21.6216
	16	40	44.4444	45.9459	36.6667	38.8889	40.5405
	24	60	63.8889	56.7568	56.6667	61.1111	56.7568
	Time to 50% abscssion rate (h)	19.7822	18.0376	18.3893	21.2396	19.9517	20.5173
	SlWRKY73-OE	repeat-1	repeat-2	repeat-3	repeat-4	repeat-5	repeat-6
	8	46.875	51.4286	48.4848	45.4545	51.4286	54.5455
	16	68.75	71.4286	63.6364	71.875	74.2857	72.7273
	24	100	97.1429	100	100	100	96.9697
	Time to 50% abscssion rate (h)	9.4743	8.1377	9.7008	9.42422	8.00199	7.29118
	Slwrky73-OE SlIDL6	repeat-1	repeat-2	repeat-3	repeat-4	repeat-5	repeat-6
	8	65.625	62.8571	69.697	75	71.4286	75.7576
	16	90.625	91.4286	93.9394	96.875	97.1429	96.9697
	24	100	97.1429	100	100	100	100
	Time to 50% abscssion rate (h)	5.56258	6.53886	5.53223	5.52858	6.1262	5.44152
	Table Analyzed
	Data sets analyzed	A-D
	ANOVA summary
	F	320.5
	P value	<0.0001
	P value summary	****
	Significant diff. among means (P < 0.05)?	Yes
	R squared	0.9796
	Brown-Forsythe test
	F (DFn, DFd)	2.355 (3, 20)
	P value	0.1025
	P value summary	ns
	Are SDs significantly different (P < 0.05)?	No
	Bartlett's test
	Bartlett's statistic (corrected)	4.986
	P value	0.1728
	P value summary	ns
	Are SDs significantly different (P < 0.05)?	No
	ANOVA table	SS	DF	MS	F (DFn, DFd)	P value
	Treatment (between columns)	1060	3	353.3	F (3, 20) = 320.5	P<0.0001
	Residual (within columns)	22.05	20	1.102
	Total	1082	23
	Data summary
	Number of treatments (columns)	4
	Number of values (total)	24
	Number of families	1
	Number of comparisons per family	6
	Alpha	0.05
	Tukey's multiple comparisons test	Mean Diff.	95.00% CI of diff.	Significant?	Summary	Adjusted P Value
	Slwrky73 vs. Slwrky73 SlIDL6	1.353	-0.3438 to 3.049	No	ns	0.1488	A-B
	Slwrky73 vs. SlWRKY73-OE	12.33	10.64 to 14.03	Yes	****	<0.0001	A-C
	Slwrky73 vs. Slwrky73-OE SlIDL6	15.22	13.52 to 16.91	Yes	****	<0.0001	A-D
	Slwrky73 SlIDL6 vs. SlWRKY73-OE	10.98	9.285 to 12.68	Yes	****	<0.0001	B-C
	Slwrky73 SlIDL6 vs. Slwrky73-OE SlIDL6	13.86	12.17 to 15.56	Yes	****	<0.0001	B-D
	SlWRKY73-OE vs. Slwrky73-OE SlIDL6	2.883	1.187 to 4.580	Yes	***	0.0006	C-D
	Test details	Mean 1	Mean 2	Mean Diff.	SE of diff.	n1	n2	q	DF
	Slwrky73 vs. Slwrky73 SlIDL6	21.01	19.65	1.353	0.6062	6	6	3.156	20
	Slwrky73 vs. SlWRKY73-OE	21.01	8.672	12.33	0.6062	6	6	28.78	20
	Slwrky73 vs. Slwrky73-OE SlIDL6	21.01	5.788	15.22	0.6062	6	6	35.5	20
	Slwrky73 SlIDL6 vs. SlWRKY73-OE	19.65	8.672	10.98	0.6062	6	6	25.62	20
	Slwrky73 SlIDL6 vs. Slwrky73-OE SlIDL6	19.65	5.788	13.86	0.6062	6	6	32.35	20
	SlWRKY73-OE vs. Slwrky73-OE SlIDL6	8.672	5.788	2.883	0.6062	6	6	6.727	20
Fig. 5F	date
	WT	Slwrky73 #8	Slwrky73 #15	SlWRKY73-OE #3	SlWRKY73-OE #13
	1	0.213773	0.404737	2.11212	2.58631
	0.987297	0.24213	0.300598	2.45739	1.99777
	0.894917	0.158242	0.244355	2.72438	2.399
	Table Analyzed
	Data sets analyzed	A-E
	ANOVA summary
	F	87.93
	P value	<0.0001
	P value summary	****
	Significant diff. among means (P < 0.05)?	Yes
	R squared	0.9724
	Brown-Forsythe test
	F (DFn, DFd)	1.499 (4, 10)
	P value	0.2745
	P value summary	ns
	Are SDs significantly different (P < 0.05)?	No
	Bartlett's test
	Bartlett's statistic (corrected)
	P value
	P value summary
	Are SDs significantly different (P < 0.05)?
	ANOVA table	SS	DF	MS	F (DFn, DFd)	P value
	Treatment (between columns)	13.81	4	3.453	F (4, 10) = 87.93	P<0.0001
	Residual (within columns)	0.3927	10	0.03927
	Total	14.21	14
	Data summary
	Number of treatments (columns)	5
	Number of values (total)	15
	Number of families	1
	Number of comparisons per family	4
	Alpha	0.05
	Dunnett's multiple comparisons test	Mean Diff.	95.00% CI of diff.	Significant?	Summary	Adjusted P Value	A-?
	WT vs. Slwrky73 #8	0.756	0.2883 to 1.224	Yes	**	0.003	B	Slwrky73 #8
	WT vs. Slwrky73 #15	0.6442	0.1765 to 1.112	Yes	**	0.0086	C	Slwrky73 #15
	WT vs. SlWRKY73-OE #3	-1.471	-1.938 to -1.003	Yes	****	<0.0001	D	SlWRKY73-OE #3
	WT vs. SlWRKY73-OE #13	-1.367	-1.835 to -0.8992	Yes	****	<0.0001	E	SlWRKY73-OE #13
	Test details	Mean 1	Mean 2	Mean Diff.	SE of diff.	n1	n2	q	DF
	WT vs. Slwrky73 #8	0.9607	0.2047	0.756	0.1618	3	3	4.672	10
	WT vs. Slwrky73 #15	0.9607	0.3166	0.6442	0.1618	3	3	3.981	10
	WT vs. SlWRKY73-OE #3	0.9607	2.431	-1.471	0.1618	3	3	9.088	10
	WT vs. SlWRKY73-OE #13	0.9607	2.328	-1.367	0.1618	3	3	8.448	10
Fig. 5F	date
	WT	Slwrky73 #8	Slwrky73 #15	SlWRKY73-OE #3	SlWRKY73-OE #13
	154.946	13.2888	10.0177	633.553	741.249
	134.398	8.00938	14.0117	658.615	696.369
	120.011	6.00984	11.0115	729.712	685.863
	Table Analyzed
	Data sets analyzed	A-E
	ANOVA summary
	F	509.8
	P value	<0.0001
	P value summary	****
	Significant diff. among means (P < 0.05)?	Yes
	R squared	0.9951
	Brown-Forsythe test
	F (DFn, DFd)	1.222 (4, 10)
	P value	0.3612
	P value summary	ns
	Are SDs significantly different (P < 0.05)?	No
	Bartlett's test
	Bartlett's statistic (corrected)
	P value
	P value summary
	Are SDs significantly different (P < 0.05)?
	ANOVA table	SS	DF	MS	F (DFn, DFd)	P value
	Treatment (between columns)	1501086	4	375272	F (4, 10) = 509.8	P<0.0001
	Residual (within columns)	7361	10	736.1
	Total	1508447	14
	Data summary
	Number of treatments (columns)	5
	Number of values (total)	15
	Number of families	1
	Number of comparisons per family	4
	Alpha	0.05
	Dunnett's multiple comparisons test	Mean Diff.	95.00% CI of diff.	Significant?	Summary	Adjusted P Value	A-?
	WT vs. Slwrky73 #8	127.3	63.32 to 191.4	Yes	***	0.0006	B	Slwrky73 #8
	WT vs. Slwrky73 #15	124.8	60.74 to 188.8	Yes	***	0.0008	C	Slwrky73 #15
	WT vs. SlWRKY73-OE #3	-537.5	-601.5 to -473.5	Yes	****	<0.0001	D	SlWRKY73-OE #3
	WT vs. SlWRKY73-OE #13	-571.4	-635.4 to -507.3	Yes	****	<0.0001	E	SlWRKY73-OE #13
	Test details	Mean 1	Mean 2	Mean Diff.	SE of diff.	n1	n2	q	DF
	WT vs. Slwrky73 #8	136.5	9.103	127.3	22.15	3	3	5.749	10
	WT vs. Slwrky73 #15	136.5	11.68	124.8	22.15	3	3	5.633	10
	WT vs. SlWRKY73-OE #3	136.5	674	-537.5	22.15	3	3	24.26	10
	WT vs. SlWRKY73-OE #13	136.5	707.8	-571.4	22.15	3	3	25.79	10
Fig. 5F	date
		WT			SlWRKY73-OE			Slcyp76b23			SlWRKY73-OE Slcyp76b23
	8h	37.5	34.2857	30.303	46.875	51.4286	60.6061	18.75	20	24.2424	34.375	37.1429	39.3939
	16h	56.25	51.4286	60.6061	81.25	77.1429	87.8788	37.5	45.7143	39.3939	53.125	60	60.6061
	24h	87.5	94.2857	90.9091	100	97.1429	100	53.125	51.4286	57.5758	93.75	97.1429	93.9394
	Table Analyzed
	Two-way ANOVA	Ordinary
	Alpha	0.05
	Source of Variation	% of total variation	P value	P value summary	Significant?
	Interaction	4	<0.0001	****	Yes
	Row Factor	62.66	<0.0001	****	Yes
	Column Factor	31.65	<0.0001	****	Yes
	ANOVA table	SS	DF	MS	F (DFn, DFd)	P value
	Interaction	901.4	6	150.2	F (6, 24) = 9.455	P<0.0001
	Row Factor	14121	2	7060	F (2, 24) = 444.4	P<0.0001
	Column Factor	7133	3	2378	F (3, 24) = 149.6	P<0.0001
	Residual	381.3	24	15.89
	Data summary
	Number of columns (Column Factor)	4
	Number of rows (Row Factor)	3
	Number of values	36
	Within each row, compare columns (simple effects within rows)
	Number of families	3
	Number of comparisons per family	6
	Alpha	0.05
	Tukey's multiple comparisons test	Mean Diff.	95.00% CI of diff.	Significant?	Summary	Adjusted P Value
	8h
	WT vs. SlWRKY73-OE	-18.94	-27.92 to -9.962	Yes	****	<0.0001
	WT vs. Slcyp76b23	13.03	4.054 to 22.01	Yes	**	0.0027
	WT vs. SlWRKY73-OE Slcyp76b23	-2.941	-11.92 to 6.037	No	ns	0.803
	SlWRKY73-OE vs. Slcyp76b23	31.97	22.99 to 40.95	Yes	****	<0.0001
	SlWRKY73-OE vs. SlWRKY73-OE Slcyp76b23	16	7.021 to 24.98	Yes	***	0.0003
	Slcyp76b23 vs. SlWRKY73-OE Slcyp76b23	-15.97	-24.95 to -6.995	Yes	***	0.0003
	16h
	WT vs. SlWRKY73-OE	-26	-34.97 to -17.02	Yes	****	<0.0001
	WT vs. Slcyp76b23	15.23	6.247 to 24.20	Yes	***	0.0005
	WT vs. SlWRKY73-OE Slcyp76b23	-1.815	-10.79 to 7.163	No	ns	0.9435
	SlWRKY73-OE vs. Slcyp76b23	41.22	32.24 to 50.20	Yes	****	<0.0001
	SlWRKY73-OE vs. SlWRKY73-OE Slcyp76b23	24.18	15.20 to 33.16	Yes	****	<0.0001
	Slcyp76b23 vs. SlWRKY73-OE Slcyp76b23	-17.04	-26.02 to -8.063	Yes	***	0.0001
	24h
	WT vs. SlWRKY73-OE	-8.149	-17.13 to 0.8287	No	ns	0.0847
	WT vs. Slcyp76b23	36.86	27.88 to 45.83	Yes	****	<0.0001
	WT vs. SlWRKY73-OE Slcyp76b23	-4.046	-13.02 to 4.932	No	ns	0.6065
	SlWRKY73-OE vs. Slcyp76b23	45	36.03 to 53.98	Yes	****	<0.0001
	SlWRKY73-OE vs. SlWRKY73-OE Slcyp76b23	4.104	-4.874 to 13.08	No	ns	0.5957
	Slcyp76b23 vs. SlWRKY73-OE Slcyp76b23	-40.9	-49.88 to -31.92	Yes	****	<0.0001
	Test details	Mean 1	Mean 2	Mean Diff.	SE of diff.	N1	N2	q	DF
	8h
	WT vs. SlWRKY73-OE	34.03	52.97	-18.94	3.255	3	3	8.23	24
	WT vs. Slcyp76b23	34.03	21	13.03	3.255	3	3	5.663	24
	WT vs. SlWRKY73-OE Slcyp76b23	34.03	36.97	-2.941	3.255	3	3	1.278	24
	SlWRKY73-OE vs. Slcyp76b23	52.97	21	31.97	3.255	3	3	13.89	24
	SlWRKY73-OE vs. SlWRKY73-OE Slcyp76b23	52.97	36.97	16	3.255	3	3	6.952	24
	Slcyp76b23 vs. SlWRKY73-OE Slcyp76b23	21	36.97	-15.97	3.255	3	3	6.941	24
	16h
	WT vs. SlWRKY73-OE	56.09	82.09	-26	3.255	3	3	11.3	24
	WT vs. Slcyp76b23	56.09	40.87	15.23	3.255	3	3	6.616	24
	WT vs. SlWRKY73-OE Slcyp76b23	56.09	57.91	-1.815	3.255	3	3	0.7889	24
	SlWRKY73-OE vs. Slcyp76b23	82.09	40.87	41.22	3.255	3	3	17.91	24
	SlWRKY73-OE vs. SlWRKY73-OE Slcyp76b23	82.09	57.91	24.18	3.255	3	3	10.51	24
	Slcyp76b23 vs. SlWRKY73-OE Slcyp76b23	40.87	57.91	-17.04	3.255	3	3	7.405	24
	24h
	WT vs. SlWRKY73-OE	90.9	99.05	-8.149	3.255	3	3	3.541	24
	WT vs. Slcyp76b23	90.9	54.04	36.86	3.255	3	3	16.01	24
	WT vs. SlWRKY73-OE Slcyp76b23	90.9	94.94	-4.046	3.255	3	3	1.758	24
	SlWRKY73-OE vs. Slcyp76b23	99.05	54.04	45	3.255	3	3	19.56	24
	SlWRKY73-OE vs. SlWRKY73-OE Slcyp76b23	99.05	94.94	4.104	3.255	3	3	1.783	24
	Slcyp76b23 vs. SlWRKY73-OE Slcyp76b23	54.04	94.94	-40.9	3.255	3	3	17.77	24
Fig. 5I	date
	WT	SlWRKY73-OE	Slcyp76b23	SlWRKY73-OE Slcyp76b23
	110.825	756.4	10.403	125.769
	120.594	750.438	9.278	110.36
	116.547	690.229	13.474	131.337
	Table Analyzed
	Data sets analyzed	A-D
	ANOVA summary
	F	871.4
	P value	<0.0001
	P value summary	****
	Significant diff. among means (P < 0.05)?	Yes
	R squared	0.9969
	Brown-Forsythe test
	F (DFn, DFd)	0.9005 (3, 8)
	P value	0.4821
	P value summary	ns
	Are SDs significantly different (P < 0.05)?	No
	Bartlett's test
	Bartlett's statistic (corrected)
	P value
	P value summary
	Are SDs significantly different (P < 0.05)?
	ANOVA table	SS	DF	MS	F (DFn, DFd)	P value
	Treatment (between columns)	971698	3	323899	F (3, 8) = 871.4	P<0.0001
	Residual (within columns)	2974	8	371.7
	Total	974672	11
	Data summary
	Number of treatments (columns)	4
	Number of values (total)	12
	Number of families	1
	Number of comparisons per family	3
	Alpha	0.05
	Dunnett's multiple comparisons test	Mean Diff.	95.00% CI of diff.	Significant?	Summary	Adjusted P Value	A-?
	WT vs. SlWRKY73-OE	-616.4	-661.7 to -571.0	Yes	****	<0.0001	B	SlWRKY73-OE
	WT vs. Slcyp76b23	104.9	59.61 to 150.3	Yes	***	0.0004	C	Slcyp76b23
	WT vs. SlWRKY73-OE Slcyp76b23	-6.5	-51.83 to 38.83	No	ns	0.9533	D	SlWRKY73-OE Slcyp76b23
	Test details	Mean 1	Mean 2	Mean Diff.	SE of diff.	n1	n2	q	DF
	WT vs. SlWRKY73-OE	116	732.4	-616.4	15.74	3	3	39.16	8
	WT vs. Slcyp76b23	116	11.05	104.9	15.74	3	3	6.666	8
	WT vs. SlWRKY73-OE Slcyp76b23	116	122.5	-6.5	15.74	3	3	0.4129	8
Fig. 5J	date
	WT	repeat-1	repeat-2	repeat-3	repeat-4	repeat-5	repeat-6
	8h	36.3636	38.8889	33.3333	37.5	34.2857	30.303
	16h	54.5455	61.1111	63.6364	56.25	51.4286	66.6667
	24h	93.9394	100	100	96.875	94.2857	96.9697
	Time to 50% abscssion rate (h)	12.9662	11.7636	12.3374	12.5617	13.7103	12.2207
	Slwrky73 CK	repeat-1	repeat-2	repeat-3	repeat-4	repeat-5	repeat-6
	8h	21.2121	25	18.1818	15.3846	21.875	18.1818
	16h	36.3636	37.5	39.3939	38.4615	37.5	39.3939
	24h	51.5152	56.25	54.5455	48.7179	56.25	57.5758
	Time to 50% abscssion rate (h)	23.256	21.2183	21.2491	23.5964	21.2702	20.4707
	Slwrky73 L-DOPA	repeat-1	repeat-2	repeat-3	repeat-4	repeat-5	repeat-6
	8h	36.3636	34.375	39.3939	33.3333	34.375	33.3333
	16h	54.5455	59.375	63.6364	51.5152	59.375	60.6061
	24h	93.9394	90.625	96.9697	96.9697	100	96.9697
	Time to 50% abscssion rate (h)	12.9662	12.7136	11.3559	13.8309	12.679	12.6908
	Table Analyzed
	Data sets analyzed	A-C
	ANOVA summary
	F	188.4
	P value	<0.0001
	P value summary	****
	Significant diff. among means (P < 0.05)?	Yes
	R squared	0.9617
	Brown-Forsythe test
	F (DFn, DFd)	0.5389 (2, 15)
	P value	0.5943
	P value summary	ns
	Are SDs significantly different (P < 0.05)?	No
	Bartlett's test
	Bartlett's statistic (corrected)	2.054
	P value	0.358
	P value summary	ns
	Are SDs significantly different (P < 0.05)?	No
	ANOVA table	SS	DF	MS	F (DFn, DFd)	P value
	Treatment (between columns)	338.1	2	169.1	F (2, 15) = 188.4	P<0.0001
	Residual (within columns)	13.46	15	0.8975
	Total	351.6	17
	Data summary
	Number of treatments (columns)	3
	Number of values (total)	18
	Number of families	1
	Number of comparisons per family	3
	Alpha	0.05
	Tukey's multiple comparisons test	Mean Diff.	95.00% CI of diff.	Significant?	Summary	Adjusted P Value
	WT vs. Slwrky73 CK	-9.25	-10.67 to -7.829	Yes	****	<0.0001	A-B
	WT vs. Slwrky73 L-DOPA	-0.1127	-1.533 to 1.308	No	ns	0.9769	A-C
	Slwrky73 CK vs. Slwrky73 L-DOPA	9.137	7.717 to 10.56	Yes	****	<0.0001	B-C
	Test details	Mean 1	Mean 2	Mean Diff.	SE of diff.	n1	n2	q	DF
	WT vs. Slwrky73 CK	12.59	21.84	-9.25	0.547	6	6	23.92	15
	WT vs. Slwrky73 L-DOPA	12.59	12.71	-0.1127	0.547	6	6	0.2915	15
	Slwrky73 CK vs. Slwrky73 L-DOPA	21.84	12.71	9.137	0.547	6	6	23.63	15

## Sheet: Fig. 6
Fig. 6B	date
	pTRV2-empty	repeat-1	repeat-2	repeat-3	repeat-4	repeat-5	repeat-6
	8 h	38.7097	35.2941	41.6667	41.9355	38.2353	41.6667
	16 h	61.2903	67.6471	66.6667	58.0645	67.6471	72.2222
	24 h	90.3226	94.1176	91.6667	93.5484	94.1176	97.2222
	32 h	100	100	100	100	100	100
	Time to 50% abscssion rate (h)	11.3285	11.0253	10.2152	11.0086	10.6197	9.69822
	pTRV2:SlMAPK3 #3	repeat-1	repeat-2	repeat-3	repeat-4	repeat-5	repeat-6
	8 h	23.6842	25	20.5128	23.0769	24.3243	20.5128
	16 h	31.5789	38.8889	38.4615	30.7692	37.8378	38.4615
	24 h	47.3684	52.7778	51.2821	46.1538	45.9459	51.2821
	32 h	55.2632	63.8889	64.1026	53.8462	56.7568	64.1026
	Time to 50% abscssion rate (h)	27.4823	22.4148	22.8013	28.5666	26.3715	22.8013
	pTRV2:SlMAPK3 #6	repeat-1	repeat-2	repeat-3	repeat-4	repeat-5	repeat-6
	8 h	24.2424	22.2222	21.2121	24.2424	19.4444	21.2121
	16 h	36.3636	41.6667	42.4242	36.3636	38.8889	39.3939
	24 h	51.5152	55.5556	51.5152	54.5455	47.2222	54.5455
	32 h	60.6061	61.1111	60.6061	66.6667	55.5556	60.6061
	Time to 50% abscssion rate (h)	23.9206	20.4953	21.4773	22.1038	25.4649	21.652
	pTRV2:SlMAPK3 #15	repeat-1	repeat-2	repeat-3	repeat-4	repeat-5	repeat-6
	8 h	22.5806	25.7143	25	27.2727	25	23.6842
	16 h	35.4839	40	38.8889	39.3939	41.6667	36.8421
	24 h	48.3871	51.4286	55.5556	51.5152	55.5556	52.6316
	32 h	61.2903	60	63.8889	60.6061	63.8889	57.8947
	Time to 50% abscssion rate (h)	24.6683	23.0344	21.6006	23.1013	20.6259	23.797
	pTRV2:SlMAPK1/2 #3	repeat-1	repeat-2	repeat-3	repeat-4	repeat-5	repeat-6
	8 h	27.2727	33.3333	29.4118	28.125	30.303	32.3529
	16 h	41.6667	42.4242	44.1176	40.625	48.4848	47.0588
	24 h	55.5556	57.5758	58.8235	59.375	57.5758	61.7647
	32 h	72.2222	72.7273	73.5294	71.875	78.7879	79.4118
	Time to 50% abscssion rate (h)	19.9139	18.3314	18.5376	19.4372	17.4227	16.7501
	pTRV2:SlMAPK1/2 #9	repeat-1	repeat-2	repeat-3	repeat-4	repeat-5	repeat-6
	8 h	26.6667	29.0323	30	30	30	27.2727
	16 h	40	51.6129	50	43.3333	50	45.4545
	24 h	63.3333	67.7419	60	66.6667	66.6667	60.6061
	32 h	76.6667	80.6452	70	76.6667	76.6667	72.7273
	Time to 50% abscssion rate (h)	18.8881	15.4124	16.4961	17.3793	15.6668	18.2057
	pTRV2:SlMAPK1/2 #17	repeat-1	repeat-2	repeat-3	repeat-4	repeat-5	repeat-6
	8 h	27.2727	26.3158	29.4118	29.0323	28.5714	30.303
	16 h	42.4242	39.4737	47.0588	45.1613	42.8571	48.4848
	24 h	57.5758	55.2632	61.7647	61.2903	60	63.6364
	32 h	81.8182	73.6842	76.4706	74.1935	74.2857	78.7879
	Time to 50% abscssion rate (h)	18.8247	20.3222	17.4488	18.0443	18.6889	16.7127
	pTRV2:SlMAPK1/2/3 #1	repeat-1	repeat-2	repeat-3	repeat-4	repeat-5	repeat-6
	8 h	13.8889	15.1515	20.5882	13.5135	14.2857	19.4444
	16 h	27.7778	30.303	38.2353	27.027	28.5714	36.1111
	24 h	36.1111	48.4848	44.1176	35.1351	45.7143	41.6667
	32 h	52.7778	57.5758	52.9412	51.3514	57.1429	52.7778
	Time to 50% abscssion rate (h)	31.0763	26.0644	28.8514	31.97	27.2093	29.9426
	pTRV2:SlMAPK1/2/3 #11	repeat-1	repeat-2	repeat-3	repeat-4	repeat-5	repeat-6
	8 h	17.1429	15.1515	15.7895	16.6667	14.7059	13.1579
	16 h	31.4286	30.303	26.3158	30.5556	29.4118	23.6842
	24 h	42.8571	36.3636	36.8421	41.6667	35.2941	36.8421
	32 h	57.1429	51.5152	52.6316	55.5556	52.9412	55.2632
	Time to 50% abscssion rate (h)	27.7776	31.8081	31.2122	28.6915	31.2539	29.9125
	pTRV2:SlMAPK1/2/3 #19	repeat-1	repeat-2	repeat-3	repeat-4	repeat-5	repeat-6
	8 h	11.1111	14.2857	17.9487	11.4286	14.7059	10.2564
	16 h	25	31.4286	30.7692	25.7143	32.3529	23.0769
	24 h	36.1111	42.8571	43.5897	37.1429	44.1176	38.4615
	32 h	50	51.4286	51.2821	51.4286	52.9412	48.7179
	40 h	52.7778					51.2821
	Time to 50% abscssion rate (h)	34.9771	30.4994	30.4197	31.2864	28.952	35.9276
	Table Analyzed
	Data sets analyzed	A-J
	ANOVA summary
	F	76.56
	P value	<0.0001
	P value summary	****
	Significant diff. among means (P < 0.05)?	Yes
	R squared	0.9323
	Brown-Forsythe test
	F (DFn, DFd)	1.704 (9, 50)
	P value	0.1128
	P value summary	ns
	Are SDs significantly different (P < 0.05)?	No
	Bartlett's test
	Bartlett's statistic (corrected)	13.93
	P value	0.125
	P value summary	ns
	Are SDs significantly different (P < 0.05)?	No
	ANOVA table	SS	DF	MS	F (DFn, DFd)	P value
	Treatment (between columns)	2426	9	269.6	F (9, 50) = 76.56	P<0.0001
	Residual (within columns)	176.1	50	3.521
	Total	2602	59
	Data summary
	Number of treatments (columns)	10
	Number of values (total)	60
	Number of families	1
	Number of comparisons per family	45
	Alpha	0.05
	Tukey's multiple comparisons test	Mean Diff.	95.00% CI of diff.	Significant?	Summary	Adjusted P Value
	pTRV2-empty vs. pTRV2:SlMAPK3 #3	-14.42	-18.01 to -10.84	Yes	****	<0.0001	A-B
	pTRV2-empty vs. pTRV2:SlMAPK3 #6	-11.87	-15.46 to -8.283	Yes	****	<0.0001	A-C
	pTRV2-empty vs. pTRV2:SlMAPK3 #15	-12.2	-15.78 to -8.610	Yes	****	<0.0001	A-D
	pTRV2-empty vs. pTRV2:SlMAPK1/2 #3	-7.75	-11.34 to -4.163	Yes	****	<0.0001	A-E
	pTRV2-empty vs. pTRV2:SlMAPK1/2 #9	-6.359	-9.945 to -2.773	Yes	****	<0.0001	A-F
	pTRV2-empty vs. pTRV2:SlMAPK1/2 #17	-7.691	-11.28 to -4.105	Yes	****	<0.0001	A-G
	pTRV2-empty vs. pTRV2:SlMAPK1/2/3 #1	-18.54	-22.12 to -14.95	Yes	****	<0.0001	A-H
	pTRV2-empty vs. pTRV2:SlMAPK1/2/3 #11	-19.46	-23.05 to -15.87	Yes	****	<0.0001	A-I
	pTRV2-empty vs. pTRV2:SlMAPK1/2/3 #19	-21.36	-24.95 to -17.77	Yes	****	<0.0001	A-J
	pTRV2:SlMAPK3 #3 vs. pTRV2:SlMAPK3 #6	2.554	-1.032 to 6.140	No	ns	0.3724	B-C
	pTRV2:SlMAPK3 #3 vs. pTRV2:SlMAPK3 #15	2.228	-1.359 to 5.814	No	ns	0.5655	B-D
	pTRV2:SlMAPK3 #3 vs. pTRV2:SlMAPK1/2 #3	6.674	3.088 to 10.26	Yes	****	<0.0001	B-E
	pTRV2:SlMAPK3 #3 vs. pTRV2:SlMAPK1/2 #9	8.065	4.479 to 11.65	Yes	****	<0.0001	B-F
	pTRV2:SlMAPK3 #3 vs. pTRV2:SlMAPK1/2 #17	6.733	3.146 to 10.32	Yes	****	<0.0001	B-G
	pTRV2:SlMAPK3 #3 vs. pTRV2:SlMAPK1/2/3 #1	-4.113	-7.699 to -0.5264	Yes	*	0.0133	B-H
	pTRV2:SlMAPK3 #3 vs. pTRV2:SlMAPK1/2/3 #11	-5.036	-8.623 to -1.450	Yes	***	0.001	B-I
	pTRV2:SlMAPK3 #3 vs. pTRV2:SlMAPK1/2/3 #19	-6.937	-10.52 to -3.351	Yes	****	<0.0001	B-J
	pTRV2:SlMAPK3 #6 vs. pTRV2:SlMAPK3 #15	-0.3264	-3.913 to 3.260	No	ns	>0.9999	C-D
	pTRV2:SlMAPK3 #6 vs. pTRV2:SlMAPK1/2 #3	4.12	0.5339 to 7.706	Yes	*	0.013	C-E
	pTRV2:SlMAPK3 #6 vs. pTRV2:SlMAPK1/2 #9	5.511	1.925 to 9.097	Yes	***	0.0002	C-F
	pTRV2:SlMAPK3 #6 vs. pTRV2:SlMAPK1/2 #17	4.179	0.5924 to 7.765	Yes	*	0.0111	C-G
	pTRV2:SlMAPK3 #6 vs. pTRV2:SlMAPK1/2/3 #1	-6.667	-10.25 to -3.080	Yes	****	<0.0001	C-H
	pTRV2:SlMAPK3 #6 vs. pTRV2:SlMAPK1/2/3 #11	-7.59	-11.18 to -4.004	Yes	****	<0.0001	C-I
	pTRV2:SlMAPK3 #6 vs. pTRV2:SlMAPK1/2/3 #19	-9.491	-13.08 to -5.905	Yes	****	<0.0001	C-J
	pTRV2:SlMAPK3 #15 vs. pTRV2:SlMAPK1/2 #3	4.447	0.8603 to 8.033	Yes	**	0.0053	D-E
	pTRV2:SlMAPK3 #15 vs. pTRV2:SlMAPK1/2 #9	5.837	2.251 to 9.424	Yes	****	<0.0001	D-F
	pTRV2:SlMAPK3 #15 vs. pTRV2:SlMAPK1/2 #17	4.505	0.9189 to 8.091	Yes	**	0.0045	D-G
	pTRV2:SlMAPK3 #15 vs. pTRV2:SlMAPK1/2/3 #1	-6.34	-9.927 to -2.754	Yes	****	<0.0001	D-H
	pTRV2:SlMAPK3 #15 vs. pTRV2:SlMAPK1/2/3 #11	-7.264	-10.85 to -3.678	Yes	****	<0.0001	D-I
	pTRV2:SlMAPK3 #15 vs. pTRV2:SlMAPK1/2/3 #19	-9.165	-12.75 to -5.579	Yes	****	<0.0001	D-J
	pTRV2:SlMAPK1/2 #3 vs. pTRV2:SlMAPK1/2 #9	1.391	-2.196 to 4.977	No	ns	0.9528	E-F
	pTRV2:SlMAPK1/2 #3 vs. pTRV2:SlMAPK1/2 #17	0.05855	-3.528 to 3.645	No	ns	>0.9999	E-G
	pTRV2:SlMAPK1/2 #3 vs. pTRV2:SlMAPK1/2/3 #1	-10.79	-14.37 to -7.201	Yes	****	<0.0001	E-H
	pTRV2:SlMAPK1/2 #3 vs. pTRV2:SlMAPK1/2/3 #11	-11.71	-15.30 to -8.124	Yes	****	<0.0001	E-I
	pTRV2:SlMAPK1/2 #3 vs. pTRV2:SlMAPK1/2/3 #19	-13.61	-17.20 to -10.03	Yes	****	<0.0001	E-J
	pTRV2:SlMAPK1/2 #9 vs. pTRV2:SlMAPK1/2 #17	-1.332	-4.918 to 2.254	No	ns	0.9638	F-G
	pTRV2:SlMAPK1/2 #9 vs. pTRV2:SlMAPK1/2/3 #1	-12.18	-15.76 to -8.591	Yes	****	<0.0001	F-H
	pTRV2:SlMAPK1/2 #9 vs. pTRV2:SlMAPK1/2/3 #11	-13.1	-16.69 to -9.515	Yes	****	<0.0001	F-I
	pTRV2:SlMAPK1/2 #9 vs. pTRV2:SlMAPK1/2/3 #19	-15	-18.59 to -11.42	Yes	****	<0.0001	F-J
	pTRV2:SlMAPK1/2 #17 vs. pTRV2:SlMAPK1/2/3 #1	-10.85	-14.43 to -7.259	Yes	****	<0.0001	G-H
	pTRV2:SlMAPK1/2 #17 vs. pTRV2:SlMAPK1/2/3 #11	-11.77	-15.36 to -8.183	Yes	****	<0.0001	G-I
	pTRV2:SlMAPK1/2 #17 vs. pTRV2:SlMAPK1/2/3 #19	-13.67	-17.26 to -10.08	Yes	****	<0.0001	G-J
	pTRV2:SlMAPK1/2/3 #1 vs. pTRV2:SlMAPK1/2/3 #11	-0.9236	-4.510 to 2.663	No	ns	0.9972	H-I
	pTRV2:SlMAPK1/2/3 #1 vs. pTRV2:SlMAPK1/2/3 #19	-2.825	-6.411 to 0.7616	No	ns	0.2414	H-J
	pTRV2:SlMAPK1/2/3 #11 vs. pTRV2:SlMAPK1/2/3 #19	-1.901	-5.487 to 1.685	No	ns	0.759	I-J
	Test details	Mean 1	Mean 2	Mean Diff.	SE of diff.	n1	n2	q	DF
	pTRV2-empty vs. pTRV2:SlMAPK3 #3	10.65	25.07	-14.42	1.083	6	6	18.83	50
	pTRV2-empty vs. pTRV2:SlMAPK3 #6	10.65	22.52	-11.87	1.083	6	6	15.49	50
	pTRV2-empty vs. pTRV2:SlMAPK3 #15	10.65	22.85	-12.2	1.083	6	6	15.92	50
	pTRV2-empty vs. pTRV2:SlMAPK1/2 #3	10.65	18.4	-7.75	1.083	6	6	10.12	50
	pTRV2-empty vs. pTRV2:SlMAPK1/2 #9	10.65	17.01	-6.359	1.083	6	6	8.301	50
	pTRV2-empty vs. pTRV2:SlMAPK1/2 #17	10.65	18.34	-7.691	1.083	6	6	10.04	50
	pTRV2-empty vs. pTRV2:SlMAPK1/2/3 #1	10.65	29.19	-18.54	1.083	6	6	24.2	50
	pTRV2-empty vs. pTRV2:SlMAPK1/2/3 #11	10.65	30.11	-19.46	1.083	6	6	25.4	50
	pTRV2-empty vs. pTRV2:SlMAPK1/2/3 #19	10.65	32.01	-21.36	1.083	6	6	27.88	50
	pTRV2:SlMAPK3 #3 vs. pTRV2:SlMAPK3 #6	25.07	22.52	2.554	1.083	6	6	3.334	50
	pTRV2:SlMAPK3 #3 vs. pTRV2:SlMAPK3 #15	25.07	22.85	2.228	1.083	6	6	2.908	50
	pTRV2:SlMAPK3 #3 vs. pTRV2:SlMAPK1/2 #3	25.07	18.4	6.674	1.083	6	6	8.712	50
	pTRV2:SlMAPK3 #3 vs. pTRV2:SlMAPK1/2 #9	25.07	17.01	8.065	1.083	6	6	10.53	50
	pTRV2:SlMAPK3 #3 vs. pTRV2:SlMAPK1/2 #17	25.07	18.34	6.733	1.083	6	6	8.789	50
	pTRV2:SlMAPK3 #3 vs. pTRV2:SlMAPK1/2/3 #1	25.07	29.19	-4.113	1.083	6	6	5.369	50
	pTRV2:SlMAPK3 #3 vs. pTRV2:SlMAPK1/2/3 #11	25.07	30.11	-5.036	1.083	6	6	6.574	50
	pTRV2:SlMAPK3 #3 vs. pTRV2:SlMAPK1/2/3 #19	25.07	32.01	-6.937	1.083	6	6	9.056	50
	pTRV2:SlMAPK3 #6 vs. pTRV2:SlMAPK3 #15	22.52	22.85	-0.3264	1.083	6	6	0.4261	50
	pTRV2:SlMAPK3 #6 vs. pTRV2:SlMAPK1/2 #3	22.52	18.4	4.12	1.083	6	6	5.378	50
	pTRV2:SlMAPK3 #6 vs. pTRV2:SlMAPK1/2 #9	22.52	17.01	5.511	1.083	6	6	7.194	50
	pTRV2:SlMAPK3 #6 vs. pTRV2:SlMAPK1/2 #17	22.52	18.34	4.179	1.083	6	6	5.455	50
	pTRV2:SlMAPK3 #6 vs. pTRV2:SlMAPK1/2/3 #1	22.52	29.19	-6.667	1.083	6	6	8.703	50
	pTRV2:SlMAPK3 #6 vs. pTRV2:SlMAPK1/2/3 #11	22.52	30.11	-7.59	1.083	6	6	9.908	50
	pTRV2:SlMAPK3 #6 vs. pTRV2:SlMAPK1/2/3 #19	22.52	32.01	-9.491	1.083	6	6	12.39	50
	pTRV2:SlMAPK3 #15 vs. pTRV2:SlMAPK1/2 #3	22.85	18.4	4.447	1.083	6	6	5.804	50
	pTRV2:SlMAPK3 #15 vs. pTRV2:SlMAPK1/2 #9	22.85	17.01	5.837	1.083	6	6	7.62	50
	pTRV2:SlMAPK3 #15 vs. pTRV2:SlMAPK1/2 #17	22.85	18.34	4.505	1.083	6	6	5.881	50
	pTRV2:SlMAPK3 #15 vs. pTRV2:SlMAPK1/2/3 #1	22.85	29.19	-6.34	1.083	6	6	8.276	50
	pTRV2:SlMAPK3 #15 vs. pTRV2:SlMAPK1/2/3 #11	22.85	30.11	-7.264	1.083	6	6	9.482	50
	pTRV2:SlMAPK3 #15 vs. pTRV2:SlMAPK1/2/3 #19	22.85	32.01	-9.165	1.083	6	6	11.96	50
	pTRV2:SlMAPK1/2 #3 vs. pTRV2:SlMAPK1/2 #9	18.4	17.01	1.391	1.083	6	6	1.815	50
	pTRV2:SlMAPK1/2 #3 vs. pTRV2:SlMAPK1/2 #17	18.4	18.34	0.05855	1.083	6	6	0.07643	50
	pTRV2:SlMAPK1/2 #3 vs. pTRV2:SlMAPK1/2/3 #1	18.4	29.19	-10.79	1.083	6	6	14.08	50
	pTRV2:SlMAPK1/2 #3 vs. pTRV2:SlMAPK1/2/3 #11	18.4	30.11	-11.71	1.083	6	6	15.29	50
	pTRV2:SlMAPK1/2 #3 vs. pTRV2:SlMAPK1/2/3 #19	18.4	32.01	-13.61	1.083	6	6	17.77	50
	pTRV2:SlMAPK1/2 #9 vs. pTRV2:SlMAPK1/2 #17	17.01	18.34	-1.332	1.083	6	6	1.739	50
	pTRV2:SlMAPK1/2 #9 vs. pTRV2:SlMAPK1/2/3 #1	17.01	29.19	-12.18	1.083	6	6	15.9	50
	pTRV2:SlMAPK1/2 #9 vs. pTRV2:SlMAPK1/2/3 #11	17.01	30.11	-13.1	1.083	6	6	17.1	50
	pTRV2:SlMAPK1/2 #9 vs. pTRV2:SlMAPK1/2/3 #19	17.01	32.01	-15	1.083	6	6	19.58	50
	pTRV2:SlMAPK1/2 #17 vs. pTRV2:SlMAPK1/2/3 #1	18.34	29.19	-10.85	1.083	6	6	14.16	50
	pTRV2:SlMAPK1/2 #17 vs. pTRV2:SlMAPK1/2/3 #11	18.34	30.11	-11.77	1.083	6	6	15.36	50
	pTRV2:SlMAPK1/2 #17 vs. pTRV2:SlMAPK1/2/3 #19	18.34	32.01	-13.67	1.083	6	6	17.84	50
	pTRV2:SlMAPK1/2/3 #1 vs. pTRV2:SlMAPK1/2/3 #11	29.19	30.11	-0.9236	1.083	6	6	1.206	50
	pTRV2:SlMAPK1/2/3 #1 vs. pTRV2:SlMAPK1/2/3 #19	29.19	32.01	-2.825	1.083	6	6	3.687	50
	pTRV2:SlMAPK1/2/3 #11 vs. pTRV2:SlMAPK1/2/3 #19	30.11	32.01	-1.901	1.083	6	6	2.482	50
Fig. 6C
Fig. 6F	date
		WT			Slmapk3 #2			Slmapk3 #15			SlMAPK3-OE #3			SlMAPK3-OE #10
	8	40	31.25	38.7097	21.4286	15.625	18.4211	17.8571	15.625	18.9189	50	47.5	54.1667	50	52.381	47.8261
	16	60	53.125	64.5161	39.2857	34.375	36.8421	32.1429	37.5	37.8378	81.25	77.5	83.3333	76.6667	85.7143	78.2609
	24	88	90.625	96.7742	50	46.875	47.3684	50	43.75	48.6486	96.875	95	100	96.6667	100	91.3043
	32	100	96.875	100	60.7143	53.125	55.2632	60.7143	53.125	56.7568	100	100	100	100	100	100
	Table Analyzed
	Two-way ANOVA	Ordinary
	Alpha	0.05
	Source of Variation	% of total variation	P value	P value summary	Significant?
	Interaction	2.827	<0.0001	****	Yes
	Row Factor	45.99	<0.0001	****	Yes
	Column Factor	50.19	<0.0001	****	Yes
	ANOVA table	SS	DF	MS	F (DFn, DFd)	P value
	Interaction	1267	12	105.6	F (12, 40) = 9.432	P<0.0001
	Row Factor	20606	3	6869	F (3, 40) = 613.8	P<0.0001
	Column Factor	22489	4	5622	F (4, 40) = 502.4	P<0.0001
	Residual	447.6	40	11.19
	Data summary
	Number of columns (Column Factor)	5
	Number of rows (Row Factor)	4
	Number of values	60
	Within each row, compare columns (simple effects within rows)
	Number of families	4
	Number of comparisons per family	10
	Alpha	0.05
	Tukey's multiple comparisons test	Mean Diff.	95.00% CI of diff.	Significant?	Summary	Adjusted P Value
	8
	WT vs. Slmapk3 #2	18.16	10.36 to 25.96	Yes	****	<0.0001
	WT vs. Slmapk3 #15	19.19	11.38 to 26.99	Yes	****	<0.0001
	WT vs. SlMAPK3-OE #3	-13.9	-21.70 to -6.101	Yes	****	<0.0001
	WT vs. SlMAPK3-OE #10	-13.42	-21.22 to -5.615	Yes	***	0.0001
	Slmapk3 #2 vs. Slmapk3 #15	1.025	-6.777 to 8.826	No	ns	0.9956
	Slmapk3 #2 vs. SlMAPK3-OE #3	-32.06	-39.87 to -24.26	Yes	****	<0.0001
	Slmapk3 #2 vs. SlMAPK3-OE #10	-31.58	-39.38 to -23.78	Yes	****	<0.0001
	Slmapk3 #15 vs. SlMAPK3-OE #3	-33.09	-40.89 to -25.29	Yes	****	<0.0001
	Slmapk3 #15 vs. SlMAPK3-OE #10	-32.6	-40.40 to -24.80	Yes	****	<0.0001
	SlMAPK3-OE #3 vs. SlMAPK3-OE #10	0.4865	-7.315 to 8.288	No	ns	0.9998
	16
	WT vs. Slmapk3 #2	22.38	14.58 to 30.18	Yes	****	<0.0001
	WT vs. Slmapk3 #15	23.39	15.59 to 31.19	Yes	****	<0.0001
	WT vs. SlMAPK3-OE #3	-21.48	-29.28 to -13.68	Yes	****	<0.0001
	WT vs. SlMAPK3-OE #10	-21	-28.80 to -13.20	Yes	****	<0.0001
	Slmapk3 #2 vs. Slmapk3 #15	1.007	-6.794 to 8.809	No	ns	0.9959
	Slmapk3 #2 vs. SlMAPK3-OE #3	-43.86	-51.66 to -36.06	Yes	****	<0.0001
	Slmapk3 #2 vs. SlMAPK3-OE #10	-43.38	-51.18 to -35.58	Yes	****	<0.0001
	Slmapk3 #15 vs. SlMAPK3-OE #3	-44.87	-52.67 to -37.07	Yes	****	<0.0001
	Slmapk3 #15 vs. SlMAPK3-OE #10	-44.39	-52.19 to -36.59	Yes	****	<0.0001
	SlMAPK3-OE #3 vs. SlMAPK3-OE #10	0.4805	-7.321 to 8.282	No	ns	0.9998
	24
	WT vs. Slmapk3 #2	43.72	35.92 to 51.52	Yes	****	<0.0001
	WT vs. Slmapk3 #15	44.33	36.53 to 52.13	Yes	****	<0.0001
	WT vs. SlMAPK3-OE #3	-5.492	-13.29 to 2.309	No	ns	0.2796
	WT vs. SlMAPK3-OE #10	-4.191	-11.99 to 3.611	No	ns	0.547
	Slmapk3 #2 vs. Slmapk3 #15	0.6149	-7.186 to 8.416	No	ns	0.9994
	Slmapk3 #2 vs. SlMAPK3-OE #3	-49.21	-57.01 to -41.41	Yes	****	<0.0001
	Slmapk3 #2 vs. SlMAPK3-OE #10	-47.91	-55.71 to -40.11	Yes	****	<0.0001
	Slmapk3 #15 vs. SlMAPK3-OE #3	-49.83	-57.63 to -42.02	Yes	****	<0.0001
	Slmapk3 #15 vs. SlMAPK3-OE #10	-48.52	-56.33 to -40.72	Yes	****	<0.0001
	SlMAPK3-OE #3 vs. SlMAPK3-OE #10	1.301	-6.500 to 9.103	No	ns	0.9891
	32
	WT vs. Slmapk3 #2	42.59	34.79 to 50.39	Yes	****	<0.0001
	WT vs. Slmapk3 #15	42.09	34.29 to 49.89	Yes	****	<0.0001
	WT vs. SlMAPK3-OE #3	-1.042	-8.843 to 6.760	No	ns	0.9953
	WT vs. SlMAPK3-OE #10	-1.042	-8.843 to 6.760	No	ns	0.9953
	Slmapk3 #2 vs. Slmapk3 #15	-0.4979	-8.299 to 7.303	No	ns	0.9997
	Slmapk3 #2 vs. SlMAPK3-OE #3	-43.63	-51.43 to -35.83	Yes	****	<0.0001
	Slmapk3 #2 vs. SlMAPK3-OE #10	-43.63	-51.43 to -35.83	Yes	****	<0.0001
	Slmapk3 #15 vs. SlMAPK3-OE #3	-43.13	-50.94 to -35.33	Yes	****	<0.0001
	Slmapk3 #15 vs. SlMAPK3-OE #10	-43.13	-50.94 to -35.33	Yes	****	<0.0001
	SlMAPK3-OE #3 vs. SlMAPK3-OE #10	0	-7.801 to 7.801	No	ns	>0.9999
	Test details	Mean 1	Mean 2	Mean Diff.	SE of diff.	N1	N2	q	DF
	8
	WT vs. Slmapk3 #2	36.65	18.49	18.16	2.731	3	3	9.403	40
	WT vs. Slmapk3 #15	36.65	17.47	19.19	2.731	3	3	9.934	40
	WT vs. SlMAPK3-OE #3	36.65	50.56	-13.9	2.731	3	3	7.198	40
	WT vs. SlMAPK3-OE #10	36.65	50.07	-13.42	2.731	3	3	6.946	40
	Slmapk3 #2 vs. Slmapk3 #15	18.49	17.47	1.025	2.731	3	3	0.5305	40
	Slmapk3 #2 vs. SlMAPK3-OE #3	18.49	50.56	-32.06	2.731	3	3	16.6	40
	Slmapk3 #2 vs. SlMAPK3-OE #10	18.49	50.07	-31.58	2.731	3	3	16.35	40
	Slmapk3 #15 vs. SlMAPK3-OE #3	17.47	50.56	-33.09	2.731	3	3	17.13	40
	Slmapk3 #15 vs. SlMAPK3-OE #10	17.47	50.07	-32.6	2.731	3	3	16.88	40
	SlMAPK3-OE #3 vs. SlMAPK3-OE #10	50.56	50.07	0.4865	2.731	3	3	0.2519	40
	16
	WT vs. Slmapk3 #2	59.21	36.83	22.38	2.731	3	3	11.59	40
	WT vs. Slmapk3 #15	59.21	35.83	23.39	2.731	3	3	12.11	40
	WT vs. SlMAPK3-OE #3	59.21	80.69	-21.48	2.731	3	3	11.12	40
	WT vs. SlMAPK3-OE #10	59.21	80.21	-21	2.731	3	3	10.87	40
	Slmapk3 #2 vs. Slmapk3 #15	36.83	35.83	1.007	2.731	3	3	0.5216	40
	Slmapk3 #2 vs. SlMAPK3-OE #3	36.83	80.69	-43.86	2.731	3	3	22.71	40
	Slmapk3 #2 vs. SlMAPK3-OE #10	36.83	80.21	-43.38	2.731	3	3	22.46	40
	Slmapk3 #15 vs. SlMAPK3-OE #3	35.83	80.69	-44.87	2.731	3	3	23.23	40
	Slmapk3 #15 vs. SlMAPK3-OE #10	35.83	80.21	-44.39	2.731	3	3	22.98	40
	SlMAPK3-OE #3 vs. SlMAPK3-OE #10	80.69	80.21	0.4805	2.731	3	3	0.2488	40
	24
	WT vs. Slmapk3 #2	91.8	48.08	43.72	2.731	3	3	22.64	40
	WT vs. Slmapk3 #15	91.8	47.47	44.33	2.731	3	3	22.95	40
	WT vs. SlMAPK3-OE #3	91.8	97.29	-5.492	2.731	3	3	2.843	40
	WT vs. SlMAPK3-OE #10	91.8	95.99	-4.191	2.731	3	3	2.17	40
	Slmapk3 #2 vs. Slmapk3 #15	48.08	47.47	0.6149	2.731	3	3	0.3184	40
	Slmapk3 #2 vs. SlMAPK3-OE #3	48.08	97.29	-49.21	2.731	3	3	25.48	40
	Slmapk3 #2 vs. SlMAPK3-OE #10	48.08	95.99	-47.91	2.731	3	3	24.81	40
	Slmapk3 #15 vs. SlMAPK3-OE #3	47.47	97.29	-49.83	2.731	3	3	25.8	40
	Slmapk3 #15 vs. SlMAPK3-OE #10	47.47	95.99	-48.52	2.731	3	3	25.12	40
	SlMAPK3-OE #3 vs. SlMAPK3-OE #10	97.29	95.99	1.301	2.731	3	3	0.6738	40
	32
	WT vs. Slmapk3 #2	98.96	56.37	42.59	2.731	3	3	22.05	40
	WT vs. Slmapk3 #15	98.96	56.87	42.09	2.731	3	3	21.79	40
	WT vs. SlMAPK3-OE #3	98.96	100	-1.042	2.731	3	3	0.5393	40
	WT vs. SlMAPK3-OE #10	98.96	100	-1.042	2.731	3	3	0.5393	40
	Slmapk3 #2 vs. Slmapk3 #15	56.37	56.87	-0.4979	2.731	3	3	0.2578	40
	Slmapk3 #2 vs. SlMAPK3-OE #3	56.37	100	-43.63	2.731	3	3	22.59	40
	Slmapk3 #2 vs. SlMAPK3-OE #10	56.37	100	-43.63	2.731	3	3	22.59	40
	Slmapk3 #15 vs. SlMAPK3-OE #3	56.87	100	-43.13	2.731	3	3	22.33	40
	Slmapk3 #15 vs. SlMAPK3-OE #10	56.87	100	-43.13	2.731	3	3	22.33	40
	SlMAPK3-OE #3 vs. SlMAPK3-OE #10	100	100	0	2.731	3	3	0	40
Fig. 6G
Fig. 6H	date
		pTRV2-empty			pTRV2:Slmapk1/2/3			pTRV2-empty SlIDL6			pTRV2:Slmapk1/2/3 SlIDL6
	0	0	0	0	0	0	0	0	0	0	0	0	0
	8	36.3636	36.1111	33.3333	14.2857	11.1111	14.2857	51.5151	58.3333	50	15.7895	15.1515	11.4286
	16	57.5758	61.1111	63.3333	31.4286	27.7778	34.2857	87.8788	88.8889	80	31.5789	30.303	31.4286
	24	90.9091	88.8889	86.6667	40	44.4444	42.8571	100	100	100	39.4737	45.4545	45.7143
	32	100	100	100	48.5714	55.5556	54.2857	100	100	100	50	54.5455	57.1429
	Gompertz growth
	Best-fit values
	YM	109.1	58.48	100.2	60.72
	Y0	5.05	1.664	2.67	1.949
	K	0.1102	0.1058	0.2123	0.1014
	1/K	9.073	9.448	4.71	9.864
	95% CI (profile likelihood)
	YM	99.96 to 122.3	51.66 to 70.34	96.61 to 104.2	53.60 to 73.05
	Y0	2.236 to 8.657	0.3617 to 3.817	0.3608 to 6.132	0.5396 to 4.086
	K	0.08706 to 0.1375	0.07614 to 0.1431	0.1763 to 0.2709	0.07391 to 0.1350
	1/K	7.271 to 11.49	6.987 to 13.13	3.692 to 5.672	7.410 to 13.53
	Goodness of Fit
	Degrees of Freedom	12	12	12	12
	R squared	0.9889	0.9841	0.9927	0.9852
	Sum of Squares	220.5	88.5	158.5	84.96
	Sy.x	4.286	2.716	3.635	2.661
	Constraints
	Y0	Y0 > 0	Y0 > 0	Y0 > 0	Y0 > 0
	K	K > 0	K > 0	K > 0	K > 0
	Number of points
	# of X values	15	15	15	15
	# Y values analyzed	15	15	15	15
	Two-way ANOVA	Ordinary
	Alpha	0.05
	Source of Variation	% of total variation	P value	P value summary	Significant?
	Interaction	8.167	<0.0001	****	Yes
	Row Factor	65.7	<0.0001	****	Yes
	Column Factor	25.79	<0.0001	****	Yes
	ANOVA table	SS	DF	MS	F (DFn, DFd)	P value
	Interaction	5814	12	484.5	F (12, 40) = 78.38	P<0.0001
	Row Factor	46767	4	11692	F (4, 40) = 1891	P<0.0001
	Column Factor	18358	3	6119	F (3, 40) = 989.9	P<0.0001
	Residual	247.3	40	6.182
	Data summary
	Number of columns (Column Factor)	4
	Number of rows (Row Factor)	5
	Number of values	60
	Within each row, compare columns (simple effects within rows)
	Number of families	5
	Number of comparisons per family	6
	Alpha	0.05
	Tukey's multiple comparisons test	Mean Diff.	95.00% CI of diff.	Significant?	Summary	Adjusted P Value
	0
	pTRV2-empty vs. pTRV2:Slmapk1/2/3	0	-5.441 to 5.441	No	ns	>0.9999
	pTRV2-empty vs. pTRV2-empty SlIDL6	0	-5.441 to 5.441	No	ns	>0.9999
	pTRV2-empty vs. pTRV2:Slmapk1/2/3 SlIDL6	0	-5.441 to 5.441	No	ns	>0.9999
	pTRV2:Slmapk1/2/3 vs. pTRV2-empty SlIDL6	0	-5.441 to 5.441	No	ns	>0.9999
	pTRV2:Slmapk1/2/3 vs. pTRV2:Slmapk1/2/3 SlIDL6	0	-5.441 to 5.441	No	ns	>0.9999
	pTRV2-empty SlIDL6 vs. pTRV2:Slmapk1/2/3 SlIDL6	0	-5.441 to 5.441	No	ns	>0.9999
	8
	pTRV2-empty vs. pTRV2:Slmapk1/2/3	22.04	16.60 to 27.48	Yes	****	<0.0001
	pTRV2-empty vs. pTRV2-empty SlIDL6	-18.01	-23.45 to -12.57	Yes	****	<0.0001
	pTRV2-empty vs. pTRV2:Slmapk1/2/3 SlIDL6	21.15	15.70 to 26.59	Yes	****	<0.0001
	pTRV2:Slmapk1/2/3 vs. pTRV2-empty SlIDL6	-40.06	-45.50 to -34.61	Yes	****	<0.0001
	pTRV2:Slmapk1/2/3 vs. pTRV2:Slmapk1/2/3 SlIDL6	-0.8957	-6.337 to 4.546	No	ns	0.9709
	pTRV2-empty SlIDL6 vs. pTRV2:Slmapk1/2/3 SlIDL6	39.16	33.72 to 44.60	Yes	****	<0.0001
	16
	pTRV2-empty vs. pTRV2:Slmapk1/2/3	29.51	24.07 to 34.95	Yes	****	<0.0001
	pTRV2-empty vs. pTRV2-empty SlIDL6	-24.92	-30.36 to -19.47	Yes	****	<0.0001
	pTRV2-empty vs. pTRV2:Slmapk1/2/3 SlIDL6	29.57	24.13 to 35.01	Yes	****	<0.0001
	pTRV2:Slmapk1/2/3 vs. pTRV2-empty SlIDL6	-54.43	-59.87 to -48.98	Yes	****	<0.0001
	pTRV2:Slmapk1/2/3 vs. pTRV2:Slmapk1/2/3 SlIDL6	0.0605	-5.381 to 5.502	No	ns	>0.9999
	pTRV2-empty SlIDL6 vs. pTRV2:Slmapk1/2/3 SlIDL6	54.49	49.04 to 59.93	Yes	****	<0.0001
	24
	pTRV2-empty vs. pTRV2:Slmapk1/2/3	46.39	40.95 to 51.83	Yes	****	<0.0001
	pTRV2-empty vs. pTRV2-empty SlIDL6	-11.18	-16.62 to -5.737	Yes	****	<0.0001
	pTRV2-empty vs. pTRV2:Slmapk1/2/3 SlIDL6	45.27	39.83 to 50.72	Yes	****	<0.0001
	pTRV2:Slmapk1/2/3 vs. pTRV2-empty SlIDL6	-57.57	-63.01 to -52.12	Yes	****	<0.0001
	pTRV2:Slmapk1/2/3 vs. pTRV2:Slmapk1/2/3 SlIDL6	-1.114	-6.555 to 4.328	No	ns	0.9464
	pTRV2-empty SlIDL6 vs. pTRV2:Slmapk1/2/3 SlIDL6	56.45	51.01 to 61.89	Yes	****	<0.0001
	32
	pTRV2-empty vs. pTRV2:Slmapk1/2/3	47.2	41.75 to 52.64	Yes	****	<0.0001
	pTRV2-empty vs. pTRV2-empty SlIDL6	0	-5.441 to 5.441	No	ns	>0.9999
	pTRV2-empty vs. pTRV2:Slmapk1/2/3 SlIDL6	46.1	40.66 to 51.55	Yes	****	<0.0001
	pTRV2:Slmapk1/2/3 vs. pTRV2-empty SlIDL6	-47.2	-52.64 to -41.75	Yes	****	<0.0001
	pTRV2:Slmapk1/2/3 vs. pTRV2:Slmapk1/2/3 SlIDL6	-1.092	-6.533 to 4.350	No	ns	0.9492
	pTRV2-empty SlIDL6 vs. pTRV2:Slmapk1/2/3 SlIDL6	46.1	40.66 to 51.55	Yes	****	<0.0001
	Test details	Mean 1	Mean 2	Mean Diff.	SE of diff.	N1	N2	q	DF
	0
	pTRV2-empty vs. pTRV2:Slmapk1/2/3	0	0	0	2.03	3	3	0	40
	pTRV2-empty vs. pTRV2-empty SlIDL6	0	0	0	2.03	3	3	0	40
	pTRV2-empty vs. pTRV2:Slmapk1/2/3 SlIDL6	0	0	0	2.03	3	3	0	40
	pTRV2:Slmapk1/2/3 vs. pTRV2-empty SlIDL6	0	0	0	2.03	3	3	0	40
	pTRV2:Slmapk1/2/3 vs. pTRV2:Slmapk1/2/3 SlIDL6	0	0	0	2.03	3	3	0	40
	pTRV2-empty SlIDL6 vs. pTRV2:Slmapk1/2/3 SlIDL6	0	0	0	2.03	3	3	0	40
	8
	pTRV2-empty vs. pTRV2:Slmapk1/2/3	35.27	13.23	22.04	2.03	3	3	15.36	40
	pTRV2-empty vs. pTRV2-empty SlIDL6	35.27	53.28	-18.01	2.03	3	3	12.55	40
	pTRV2-empty vs. pTRV2:Slmapk1/2/3 SlIDL6	35.27	14.12	21.15	2.03	3	3	14.73	40
	pTRV2:Slmapk1/2/3 vs. pTRV2-empty SlIDL6	13.23	53.28	-40.06	2.03	3	3	27.9	40
	pTRV2:Slmapk1/2/3 vs. pTRV2:Slmapk1/2/3 SlIDL6	13.23	14.12	-0.8957	2.03	3	3	0.624	40
	pTRV2-empty SlIDL6 vs. pTRV2:Slmapk1/2/3 SlIDL6	53.28	14.12	39.16	2.03	3	3	27.28	40
	16
	pTRV2-empty vs. pTRV2:Slmapk1/2/3	60.67	31.16	29.51	2.03	3	3	20.56	40
	pTRV2-empty vs. pTRV2-empty SlIDL6	60.67	85.59	-24.92	2.03	3	3	17.36	40
	pTRV2-empty vs. pTRV2:Slmapk1/2/3 SlIDL6	60.67	31.1	29.57	2.03	3	3	20.6	40
	pTRV2:Slmapk1/2/3 vs. pTRV2-empty SlIDL6	31.16	85.59	-54.43	2.03	3	3	37.91	40
	pTRV2:Slmapk1/2/3 vs. pTRV2:Slmapk1/2/3 SlIDL6	31.16	31.1	0.0605	2.03	3	3	0.04215	40
	pTRV2-empty SlIDL6 vs. pTRV2:Slmapk1/2/3 SlIDL6	85.59	31.1	54.49	2.03	3	3	37.96	40
	24
	pTRV2-empty vs. pTRV2:Slmapk1/2/3	88.82	42.43	46.39	2.03	3	3	32.32	40
	pTRV2-empty vs. pTRV2-empty SlIDL6	88.82	100	-11.18	2.03	3	3	7.787	40
	pTRV2-empty vs. pTRV2:Slmapk1/2/3 SlIDL6	88.82	43.55	45.27	2.03	3	3	31.54	40
	pTRV2:Slmapk1/2/3 vs. pTRV2-empty SlIDL6	42.43	100	-57.57	2.03	3	3	40.1	40
	pTRV2:Slmapk1/2/3 vs. pTRV2:Slmapk1/2/3 SlIDL6	42.43	43.55	-1.114	2.03	3	3	0.7758	40
	pTRV2-empty SlIDL6 vs. pTRV2:Slmapk1/2/3 SlIDL6	100	43.55	56.45	2.03	3	3	39.33	40
	32
	pTRV2-empty vs. pTRV2:Slmapk1/2/3	100	52.8	47.2	2.03	3	3	32.88	40
	pTRV2-empty vs. pTRV2-empty SlIDL6	100	100	0	2.03	3	3	0	40
	pTRV2-empty vs. pTRV2:Slmapk1/2/3 SlIDL6	100	53.9	46.1	2.03	3	3	32.12	40
	pTRV2:Slmapk1/2/3 vs. pTRV2-empty SlIDL6	52.8	100	-47.2	2.03	3	3	32.88	40
	pTRV2:Slmapk1/2/3 vs. pTRV2:Slmapk1/2/3 SlIDL6	52.8	53.9	-1.092	2.03	3	3	0.7606	40
	pTRV2-empty SlIDL6 vs. pTRV2:Slmapk1/2/3 SlIDL6	100	53.9	46.1	2.03	3	3	32.12	40
		pTRV2-empty	pTRV2:Slmapk1/2/3	pTRV2-empty SlIDL6	pTRV2:Slmapk1/2/3 SlIDL6
	0	5.04972	1.66377	2.66972	1.94918
	0.032032	5.10471	1.68394	2.73615	1.97104
	0.0640641	5.1601	1.70428	2.80376	1.99306
	0.0960961	5.2159	1.72479	2.87257	2.01526
	0.128128	5.2721	1.74549	2.94258	2.03764
	0.16016	5.3287	1.76636	3.0138	2.06019
	0.192192	5.38571	1.7874	3.08625	2.08291
	0.224224	5.44312	1.80863	3.15993	2.10581
	0.256256	5.50094	1.83003	3.23486	2.12889
	0.288288	5.55917	1.85162	3.31103	2.15214
	0.32032	5.61781	1.87338	3.38846	2.17557
	0.352352	5.67685	1.89532	3.46716	2.19918
	0.384384	5.73631	1.91745	3.54714	2.22297
	0.416416	5.79617	1.93976	3.6284	2.24693
	0.448448	5.85644	1.96225	3.71095	2.27108
	0.48048	5.91713	1.98492	3.7948	2.29541
	0.512513	5.97823	2.00778	3.87996	2.31991
	0.544545	6.03974	2.03083	3.96643	2.3446
	0.576577	6.10166	2.05405	4.05423	2.36947
	0.608609	6.16399	2.07747	4.14335	2.39452
	0.640641	6.22674	2.10107	4.23381	2.41975
	0.672673	6.2899	2.12485	4.3256	2.44516
	0.704705	6.35348	2.14883	4.41875	2.47076
	0.736737	6.41747	2.17299	4.51325	2.49654
	0.768769	6.48188	2.19734	4.60911	2.52251
	0.800801	6.54671	2.22188	4.70634	2.54866
	0.832833	6.61195	2.24661	4.80494	2.575
	0.864865	6.6776	2.27153	4.90491	2.60152
	0.896897	6.74368	2.29664	5.00626	2.62822
	0.928929	6.81017	2.32194	5.109	2.65512
	0.960961	6.87708	2.34744	5.21313	2.6822
	0.992993	6.94441	2.37312	5.31866	2.70946
	1.02503	7.01215	2.399	5.42559	2.73692
	1.05706	7.08032	2.42507	5.53391	2.76456
	1.08909	7.1489	2.45134	5.64365	2.79239
	1.12112	7.21791	2.47779	5.75479	2.82041
	1.15315	7.28733	2.50445	5.86735	2.84862
	1.18519	7.35717	2.5313	5.98132	2.87701
	1.21722	7.42743	2.55834	6.09672	2.9056
	1.24925	7.49811	2.58558	6.21353	2.93438
	1.28128	7.56921	2.61302	6.33177	2.96334
	1.31331	7.64074	2.64065	6.45143	2.9925
	1.34535	7.71268	2.66848	6.57252	3.02185
	1.37738	7.78504	2.69651	6.69504	3.05139
	1.40941	7.85782	2.72474	6.81899	3.08112
	1.44144	7.93102	2.75316	6.94437	3.11104
	1.47347	8.00464	2.78178	7.07118	3.14116
	1.50551	8.07869	2.81061	7.19943	3.17147
	1.53754	8.15315	2.83963	7.3291	3.20197
	1.56957	8.22803	2.86885	7.46022	3.23266
	1.6016	8.30334	2.89827	7.59276	3.26355
	1.63363	8.37906	2.9279	7.72674	3.29463
	1.66567	8.45521	2.95772	7.86214	3.3259
	1.6977	8.53177	2.98775	7.99898	3.35737
	1.72973	8.60875	3.01797	8.13725	3.38903
	1.76176	8.68616	3.0484	8.27695	3.42089
	1.79379	8.76398	3.07903	8.41807	3.45294
	1.82583	8.84222	3.10987	8.56062	3.48519
	1.85786	8.92088	3.1409	8.70459	3.51763
	1.88989	8.99996	3.17214	8.84999	3.55027
	1.92192	9.07946	3.20359	8.9968	3.5831
	1.95395	9.15938	3.23523	9.14503	3.61613
	1.98599	9.23971	3.26708	9.29467	3.64935
	2.01802	9.32047	3.29914	9.44571	3.68278
	2.05005	9.40164	3.3314	9.59817	3.71639
	2.08208	9.48322	3.36386	9.75203	3.7502
	2.11411	9.56523	3.39653	9.90728	3.78421
	2.14615	9.64765	3.4294	10.0639	3.81842
	2.17818	9.73048	3.46248	10.222	3.85282
	2.21021	9.81374	3.49577	10.3814	3.88742
	2.24224	9.8974	3.52926	10.5422	3.92222
	2.27427	9.98148	3.56295	10.7044	3.95721
	2.30631	10.066	3.59686	10.8679	3.9924
	2.33834	10.1509	3.63097	11.0328	4.02779
	2.37037	10.2362	3.66528	11.1991	4.06338
	2.4024	10.3219	3.6998	11.3667	4.09916
	2.43443	10.4081	3.73453	11.5357	4.13514
	2.46647	10.4947	3.76946	11.706	4.17132
	2.4985	10.5816	3.80461	11.8777	4.2077
	2.53053	10.669	3.83996	12.0507	4.24427
	2.56256	10.7568	3.87551	12.225	4.28104
	2.59459	10.845	3.91127	12.4006	4.31801
	2.62663	10.9336	3.94725	12.5775	4.35518
	2.65866	11.0226	3.98342	12.7557	4.39255
	2.69069	11.112	4.01981	12.9352	4.43011
	2.72272	11.2019	4.0564	13.116	4.46787
	2.75475	11.2921	4.0932	13.2981	4.50583
	2.78679	11.3827	4.13021	13.4814	4.54399
	2.81882	11.4738	4.16742	13.666	4.58234
	2.85085	11.5652	4.20485	13.8519	4.62089
	2.88288	11.6571	4.24248	14.039	4.65964
	2.91491	11.7493	4.28032	14.2273	4.69859
	2.94695	11.842	4.31836	14.4168	4.73774
	2.97898	11.935	4.35662	14.6076	4.77708
	3.01101	12.0285	4.39508	14.7996	4.81662
	3.04304	12.1223	4.43375	14.9927	4.85636
	3.07508	12.2166	4.47263	15.1871	4.8963
	3.10711	12.3112	4.51171	15.3826	4.93643
	3.13914	12.4063	4.551	15.5793	4.97676
	3.17117	12.5017	4.5905	15.7771	5.01729
	3.2032	12.5976	4.63021	15.9761	5.05801
	3.23524	12.6938	4.67012	16.1763	5.09893
	3.26727	12.7904	4.71025	16.3775	5.14005
	3.2993	12.8874	4.75058	16.5799	5.18136
	3.33133	12.9848	4.79111	16.7833	5.22288
	3.36336	13.0826	4.83185	16.9879	5.26458
	3.3954	13.1808	4.8728	17.1936	5.30649
	3.42743	13.2793	4.91396	17.4003	5.34859
	3.45946	13.3783	4.95532	17.608	5.39088
	3.49149	13.4776	4.99689	17.8169	5.43337
	3.52352	13.5773	5.03867	18.0267	5.47606
	3.55556	13.6774	5.08065	18.2376	5.51894
	3.58759	13.7779	5.12284	18.4495	5.56202
	3.61962	13.8787	5.16523	18.6624	5.60529
	3.65165	13.98	5.20783	18.8763	5.64876
	3.68368	14.0816	5.25063	19.0911	5.69242
	3.71572	14.1836	5.29364	19.307	5.73628
	3.74775	14.2859	5.33686	19.5237	5.78033
	3.77978	14.3887	5.38028	19.7414	5.82457
	3.81181	14.4918	5.4239	19.9601	5.86901
	3.84384	14.5953	5.46773	20.1796	5.91364
	3.87588	14.6991	5.51176	20.4001	5.95846
	3.90791	14.8034	5.55599	20.6215	6.00348
	3.93994	14.908	5.60043	20.8437	6.04869
	3.97197	15.0129	5.64508	21.0668	6.09409
	4.004	15.1182	5.68992	21.2907	6.13968
	4.03604	15.2239	5.73497	21.5155	6.18547
	4.06807	15.33	5.78022	21.7411	6.23144
	4.1001	15.4364	5.82567	21.9675	6.27761
	4.13213	15.5432	5.87133	22.1947	6.32397
	4.16416	15.6503	5.91718	22.4227	6.37052
	4.1962	15.7578	5.96324	22.6515	6.41726
	4.22823	15.8656	6.0095	22.8811	6.46418
	4.26026	15.9738	6.05595	23.1113	6.5113
	4.29229	16.0824	6.10261	23.3424	6.55861
	4.32432	16.1912	6.14947	23.5741	6.6061
	4.35636	16.3005	6.19653	23.8065	6.65378
	4.38839	16.4101	6.24378	24.0397	6.70166
	4.42042	16.52	6.29124	24.2735	6.74971
	4.45245	16.6303	6.33889	24.508	6.79796
	4.48448	16.741	6.38674	24.7431	6.84639
	4.51652	16.8519	6.43479	24.9789	6.89501
	4.54855	16.9633	6.48304	25.2153	6.94382
	4.58058	17.0749	6.53148	25.4523	6.99281
	4.61261	17.1869	6.58012	25.6899	7.04198
	4.64464	17.2992	6.62895	25.9281	7.09134
	4.67668	17.4119	6.67798	26.1668	7.14089
	4.70871	17.5249	6.7272	26.4062	7.19061
	4.74074	17.6382	6.77662	26.646	7.24052
	4.77277	17.7519	6.82623	26.8864	7.29062
	4.8048	17.8658	6.87604	27.1273	7.3409
	4.83684	17.9802	6.92604	27.3688	7.39136
	4.86887	18.0948	6.97623	27.6107	7.442
	4.9009	18.2098	7.02661	27.8531	7.49282
	4.93293	18.325	7.07719	28.0959	7.54382
	4.96496	18.4406	7.12795	28.3392	7.595
	4.997	18.5565	7.17891	28.5829	7.64636
	5.02903	18.6728	7.23006	28.8271	7.6979
	5.06106	18.7893	7.28139	29.0717	7.74962
	5.09309	18.9062	7.33292	29.3166	7.80152
	5.12513	19.0234	7.38463	29.562	7.8536
	5.15716	19.1408	7.43653	29.8077	7.90585
	5.18919	19.2586	7.48862	30.0538	7.95828
	5.22122	19.3767	7.54089	30.3002	8.01088
	5.25325	19.4951	7.59335	30.5469	8.06366
	5.28529	19.6138	7.646	30.794	8.11662
	5.31732	19.7328	7.69883	31.0413	8.16975
	5.34935	19.8521	7.75185	31.289	8.22305
	5.38138	19.9717	7.80505	31.5369	8.27653
	5.41341	20.0916	7.85843	31.7851	8.33018
	5.44545	20.2118	7.912	32.0336	8.384
	5.47748	20.3323	7.96574	32.2822	8.43799
	5.50951	20.453	8.01967	32.5312	8.49216
	5.54154	20.5741	8.07378	32.7803	8.54649
	5.57357	20.6954	8.12807	33.0296	8.601
	5.60561	20.8171	8.18254	33.2791	8.65567
	5.63764	20.939	8.23719	33.5288	8.71051
	5.66967	21.0612	8.29201	33.7786	8.76552
	5.7017	21.1836	8.34702	34.0286	8.8207
	5.73373	21.3064	8.4022	34.2788	8.87604
	5.76577	21.4294	8.45755	34.529	8.93155
	5.7978	21.5527	8.51309	34.7794	8.98723
	5.82983	21.6762	8.56879	35.0299	9.04307
	5.86186	21.8001	8.62467	35.2804	9.09908
	5.89389	21.9242	8.68073	35.531	9.15524
	5.92593	22.0485	8.73695	35.7817	9.21158
	5.95796	22.1732	8.79335	36.0325	9.26807
	5.98999	22.298	8.84992	36.2833	9.32472
	6.02202	22.4232	8.90667	36.5341	9.38154
	6.05405	22.5486	8.96358	36.7849	9.43852
	6.08609	22.6743	9.02066	37.0357	9.49565
	6.11812	22.8002	9.07791	37.2866	9.55295
	6.15015	22.9263	9.13532	37.5374	9.6104
	6.18218	23.0528	9.19291	37.7881	9.66801
	6.21421	23.1794	9.25066	38.0389	9.72578
	6.24625	23.3063	9.30857	38.2896	9.7837
	6.27828	23.4335	9.36665	38.5402	9.84178
	6.31031	23.5609	9.42489	38.7907	9.90002
	6.34234	23.6885	9.4833	39.0412	9.95841
	6.37437	23.8164	9.54187	39.2915	10.0169
	6.40641	23.9445	9.6006	39.5418	10.0756
	6.43844	24.0729	9.6595	39.7919	10.1345
	6.47047	24.2014	9.71855	40.0419	10.1935
	6.5025	24.3302	9.77776	40.2918	10.2526
	6.53453	24.4593	9.83713	40.5415	10.3119
	6.56657	24.5885	9.89666	40.7911	10.3714
	6.5986	24.718	9.95634	41.0404	10.431
	6.63063	24.8477	10.0162	41.2896	10.4907
	6.66266	24.9776	10.0762	41.5387	10.5506
	6.69469	25.1078	10.1363	41.7875	10.6106
	6.72673	25.2381	10.1966	42.0361	10.6708
	6.75876	25.3687	10.2571	42.2844	10.7311
	6.79079	25.4995	10.3177	42.5326	10.7916
	6.82282	25.6305	10.3785	42.7805	10.8522
	6.85485	25.7617	10.4394	43.0281	10.913
	6.88689	25.8931	10.5004	43.2755	10.9739
	6.91892	26.0247	10.5616	43.5227	11.0349
	6.95095	26.1565	10.623	43.7695	11.0961
	6.98298	26.2886	10.6845	44.0161	11.1574
	7.01502	26.4208	10.7462	44.2623	11.2189
	7.04705	26.5532	10.8079	44.5083	11.2805
	7.07908	26.6858	10.8699	44.7539	11.3422
	7.11111	26.8186	10.932	44.9993	11.4041
	7.14314	26.9515	10.9942	45.2442	11.4661
	7.17518	27.0847	11.0566	45.4889	11.5282
	7.20721	27.2181	11.1191	45.7332	11.5905
	7.23924	27.3516	11.1817	45.9771	11.6529
	7.27127	27.4853	11.2445	46.2207	11.7154
	7.3033	27.6192	11.3074	46.4639	11.778
	7.33534	27.7533	11.3705	46.7067	11.8408
	7.36737	27.8875	11.4337	46.9492	11.9038
	7.3994	28.0219	11.497	47.1912	11.9668
	7.43143	28.1565	11.5605	47.4328	12.03
	7.46346	28.2913	11.6241	47.674	12.0933
	7.4955	28.4262	11.6878	47.9148	12.1567
	7.52753	28.5613	11.7517	48.1552	12.2203
	7.55956	28.6966	11.8157	48.3951	12.284
	7.59159	28.832	11.8798	48.6346	12.3478
	7.62362	28.9675	11.9441	48.8737	12.4117
	7.65566	29.1033	12.0085	49.1122	12.4758
	7.68769	29.2392	12.073	49.3504	12.54
	7.71972	29.3752	12.1376	49.588	12.6042
	7.75175	29.5114	12.2024	49.8252	12.6687
	7.78378	29.6477	12.2673	50.0618	12.7332
	7.81582	29.7842	12.3323	50.298	12.7978
	7.84785	29.9208	12.3975	50.5337	12.8626
	7.87988	30.0576	12.4627	50.7689	12.9275
	7.91191	30.1945	12.5281	51.0036	12.9925
	7.94394	30.3315	12.5936	51.2377	13.0576
	7.97598	30.4687	12.6592	51.4714	13.1228
	8.00801	30.606	12.725	51.7045	13.1882
	8.04004	30.7435	12.7908	51.9371	13.2536
	8.07207	30.881	12.8568	52.1691	13.3192
	8.1041	31.0187	12.9229	52.4006	13.3849
	8.13614	31.1566	12.9891	52.6315	13.4506
	8.16817	31.2945	13.0554	52.8619	13.5165
	8.2002	31.4326	13.1218	53.0917	13.5825
	8.23223	31.5708	13.1884	53.3209	13.6486
	8.26426	31.7091	13.255	53.5496	13.7149
	8.2963	31.8475	13.3218	53.7777	13.7812
	8.32833	31.986	13.3886	54.0052	13.8476
	8.36036	32.1247	13.4556	54.2321	13.9141
	8.39239	32.2634	13.5227	54.4584	13.9807
	8.42442	32.4023	13.5899	54.6841	14.0475
	8.45646	32.5413	13.6572	54.9093	14.1143
	8.48849	32.6803	13.7246	55.1338	14.1812
	8.52052	32.8195	13.7921	55.3577	14.2482
	8.55255	32.9588	13.8597	55.5809	14.3154
	8.58458	33.0981	13.9274	55.8036	14.3826
	8.61662	33.2376	13.9952	56.0256	14.4499
	8.64865	33.3772	14.0631	56.247	14.5173
	8.68068	33.5168	14.1311	56.4678	14.5848
	8.71271	33.6565	14.1991	56.6879	14.6524
	8.74474	33.7964	14.2673	56.9074	14.7201
	8.77678	33.9363	14.3356	57.1262	14.7879
	8.80881	34.0763	14.404	57.3444	14.8558
	8.84084	34.2163	14.4725	57.5619	14.9238
	8.87287	34.3565	14.541	57.7788	14.9918
	8.9049	34.4967	14.6097	57.995	15.0599
	8.93694	34.637	14.6784	58.2106	15.1282
	8.96897	34.7774	14.7473	58.4255	15.1965
	9.001	34.9179	14.8162	58.6397	15.2649
	9.03303	35.0584	14.8852	58.8532	15.3334
	9.06507	35.199	14.9543	59.066	15.402
	9.0971	35.3396	15.0235	59.2782	15.4706
	9.12913	35.4803	15.0928	59.4897	15.5393
	9.16116	35.6211	15.1621	59.7005	15.6082
	9.19319	35.7619	15.2315	59.9106	15.6771
	9.22523	35.9028	15.3011	60.1201	15.746
	9.25726	36.0438	15.3707	60.3288	15.8151
	9.28929	36.1848	15.4403	60.5368	15.8842
	9.32132	36.3258	15.5101	60.7441	15.9534
	9.35335	36.4669	15.5799	60.9508	16.0227
	9.38539	36.6081	15.6498	61.1567	16.0921
	9.41742	36.7493	15.7198	61.3619	16.1615
	9.44945	36.8905	15.7898	61.5664	16.231
	9.48148	37.0318	15.86	61.7702	16.3006
	9.51351	37.1731	15.9302	61.9733	16.3702
	9.54555	37.3145	16.0005	62.1756	16.44
	9.57758	37.4559	16.0708	62.3773	16.5097
	9.60961	37.5973	16.1412	62.5782	16.5796
	9.64164	37.7388	16.2117	62.7784	16.6495
	9.67367	37.8803	16.2822	62.9779	16.7195
	9.70571	38.0218	16.3529	63.1767	16.7896
	9.73774	38.1633	16.4235	63.3747	16.8597
	9.76977	38.3049	16.4943	63.572	16.9299
	9.8018	38.4465	16.5651	63.7686	17.0001
	9.83383	38.5881	16.636	63.9644	17.0704
	9.86587	38.7298	16.7069	64.1595	17.1408
	9.8979	38.8714	16.7779	64.3539	17.2113
	9.92993	39.0131	16.849	64.5476	17.2818
	9.96196	39.1548	16.9201	64.7405	17.3523
	9.99399	39.2965	16.9912	64.9326	17.4229
	10.026	39.4382	17.0625	65.1241	17.4936
	10.0581	39.58	17.1338	65.3148	17.5643
	10.0901	39.7217	17.2051	65.5047	17.6351
	10.1221	39.8634	17.2765	65.6939	17.7059
	10.1542	40.0052	17.3479	65.8824	17.7768
	10.1862	40.1469	17.4194	66.0701	17.8477
	10.2182	40.2886	17.491	66.2571	17.9187
	10.2503	40.4304	17.5626	66.4434	17.9898
	10.2823	40.5721	17.6343	66.6289	18.0609
	10.3143	40.7138	17.706	66.8136	18.132
	10.3463	40.8556	17.7777	66.9976	18.2032
	10.3784	40.9973	17.8495	67.1809	18.2744
	10.4104	41.139	17.9213	67.3634	18.3457
	10.4424	41.2807	17.9932	67.5452	18.417
	10.4745	41.4224	18.0651	67.7262	18.4884
	10.5065	41.564	18.1371	67.9065	18.5598
	10.5385	41.7057	18.2091	68.086	18.6313
	10.5706	41.8473	18.2812	68.2648	18.7028
	10.6026	41.9889	18.3533	68.4428	18.7743
	10.6346	42.1305	18.4254	68.6201	18.8459
	10.6667	42.272	18.4976	68.7967	18.9175
	10.6987	42.4136	18.5698	68.9725	18.9892
	10.7307	42.5551	18.642	69.1475	19.0609
	10.7628	42.6965	18.7143	69.3218	19.1326
	10.7948	42.838	18.7866	69.4954	19.2044
	10.8268	42.9794	18.8589	69.6682	19.2762
	10.8589	43.1208	18.9313	69.8402	19.3481
	10.8909	43.2621	19.0037	70.0115	19.4199
	10.9229	43.4034	19.0762	70.1821	19.4919
	10.955	43.5447	19.1486	70.3519	19.5638
	10.987	43.6859	19.2211	70.521	19.6358
	11.019	43.8271	19.2937	70.6894	19.7078
	11.0511	43.9683	19.3662	70.857	19.7798
	11.0831	44.1093	19.4388	71.0238	19.8519
	11.1151	44.2504	19.5114	71.1899	19.9239
	11.1471	44.3914	19.584	71.3553	19.9961
	11.1792	44.5323	19.6567	71.5199	20.0682
	11.2112	44.6732	19.7293	71.6838	20.1404
	11.2432	44.8141	19.802	71.8469	20.2126
	11.2753	44.9549	19.8747	72.0094	20.2848
	11.3073	45.0956	19.9475	72.171	20.357
	11.3393	45.2363	20.0202	72.332	20.4293
	11.3714	45.3769	20.093	72.4922	20.5015
	11.4034	45.5175	20.1658	72.6516	20.5738
	11.4354	45.658	20.2386	72.8104	20.6461
	11.4675	45.7984	20.3114	72.9684	20.7185
	11.4995	45.9388	20.3842	73.1256	20.7908
	11.5315	46.0791	20.4571	73.2822	20.8632
	11.5636	46.2193	20.5299	73.438	20.9356
	11.5956	46.3594	20.6028	73.5931	21.008
	11.6276	46.4995	20.6757	73.7474	21.0804
	11.6597	46.6395	20.7486	73.901	21.1528
	11.6917	46.7795	20.8215	74.0539	21.2253
	11.7237	46.9194	20.8944	74.2061	21.2977
	11.7558	47.0591	20.9673	74.3576	21.3702
	11.7878	47.1989	21.0402	74.5083	21.4427
	11.8198	47.3385	21.1131	74.6583	21.5152
	11.8519	47.478	21.1861	74.8076	21.5877
	11.8839	47.6175	21.259	74.9562	21.6602
	11.9159	47.7569	21.3319	75.1041	21.7327
	11.9479	47.8962	21.4049	75.2512	21.8052
	11.98	48.0354	21.4778	75.3977	21.8777
	12.012	48.1745	21.5508	75.5434	21.9502
	12.044	48.3136	21.6237	75.6884	22.0228
	12.0761	48.4525	21.6966	75.8327	22.0953
	12.1081	48.5914	21.7696	75.9763	22.1678
	12.1401	48.7301	21.8425	76.1193	22.2404
	12.1722	48.8688	21.9154	76.2615	22.3129
	12.2042	49.0073	21.9884	76.403	22.3855
	12.2362	49.1458	22.0613	76.5438	22.458
	12.2683	49.2842	22.1342	76.6839	22.5305
	12.3003	49.4225	22.2071	76.8233	22.6031
	12.3323	49.5606	22.28	76.962	22.6756
	12.3644	49.6987	22.3529	77.1	22.7481
	12.3964	49.8366	22.4258	77.2373	22.8207
	12.4284	49.9745	22.4986	77.374	22.8932
	12.4605	50.1123	22.5715	77.5099	22.9657
	12.4925	50.2499	22.6444	77.6452	23.0382
	12.5245	50.3874	22.7172	77.7798	23.1107
	12.5566	50.5248	22.79	77.9137	23.1832
	12.5886	50.6622	22.8628	78.0469	23.2557
	12.6206	50.7994	22.9356	78.1795	23.3281
	12.6527	50.9364	23.0084	78.3114	23.4006
	12.6847	51.0734	23.0811	78.4426	23.4731
	12.7167	51.2103	23.1539	78.5731	23.5455
	12.7487	51.347	23.2266	78.7029	23.6179
	12.7808	51.4836	23.2993	78.8321	23.6904
	12.8128	51.6201	23.372	78.9607	23.7628
	12.8448	51.7565	23.4447	79.0885	23.8351
	12.8769	51.8927	23.5173	79.2157	23.9075
	12.9089	52.0289	23.5899	79.3423	23.9799
	12.9409	52.1649	23.6625	79.4681	24.0522
	12.973	52.3008	23.7351	79.5934	24.1245
	13.005	52.4365	23.8077	79.7179	24.1968
	13.037	52.5721	23.8802	79.8419	24.2691
	13.0691	52.7076	23.9527	79.9651	24.3414
	13.1011	52.843	24.0252	80.0878	24.4136
	13.1331	52.9782	24.0976	80.2097	24.4859
	13.1652	53.1133	24.1701	80.3311	24.5581
	13.1972	53.2483	24.2424	80.4518	24.6302
	13.2292	53.3831	24.3148	80.5718	24.7024
	13.2613	53.5178	24.3871	80.6912	24.7745
	13.2933	53.6524	24.4594	80.81	24.8466
	13.3253	53.7868	24.5317	80.9282	24.9187
	13.3574	53.9211	24.604	81.0457	24.9908
	13.3894	54.0553	24.6762	81.1626	25.0628
	13.4214	54.1893	24.7483	81.2789	25.1348
	13.4535	54.3231	24.8205	81.3945	25.2068
	13.4855	54.4568	24.8926	81.5096	25.2788
	13.5175	54.5904	24.9646	81.624	25.3507
	13.5495	54.7238	25.0367	81.7378	25.4226
	13.5816	54.8571	25.1087	81.8509	25.4944
	13.6136	54.9903	25.1806	81.9635	25.5663
	13.6456	55.1233	25.2525	82.0754	25.6381
	13.6777	55.2561	25.3244	82.1868	25.7098
	13.7097	55.3888	25.3963	82.2975	25.7816
	13.7417	55.5213	25.4681	82.4077	25.8533
	13.7738	55.6537	25.5398	82.5172	25.9249
	13.8058	55.786	25.6115	82.6262	25.9966
	13.8378	55.9181	25.6832	82.7345	26.0682
	13.8699	56.05	25.7548	82.8423	26.1397
	13.9019	56.1818	25.8264	82.9494	26.2113
	13.9339	56.3134	25.898	83.056	26.2828
	13.966	56.4448	25.9695	83.162	26.3542
	13.998	56.5761	26.0409	83.2674	26.4256
	14.03	56.7073	26.1123	83.3722	26.497
	14.0621	56.8383	26.1837	83.4764	26.5683
	14.0941	56.9691	26.255	83.5801	26.6396
	14.1261	57.0997	26.3263	83.6832	26.7109
	14.1582	57.2302	26.3975	83.7857	26.7821
	14.1902	57.3606	26.4687	83.8876	26.8532
	14.2222	57.4908	26.5398	83.989	26.9244
	14.2543	57.6208	26.6108	84.0898	26.9955
	14.2863	57.7506	26.6818	84.19	27.0665
	14.3183	57.8803	26.7528	84.2897	27.1375
	14.3504	58.0098	26.8237	84.3888	27.2084
	14.3824	58.1391	26.8946	84.4874	27.2793
	14.4144	58.2683	26.9654	84.5854	27.3502
	14.4464	58.3973	27.0361	84.6829	27.421
	14.4785	58.5261	27.1068	84.7798	27.4918
	14.5105	58.6548	27.1775	84.8762	27.5625
	14.5425	58.7833	27.248	84.972	27.6332
	14.5746	58.9116	27.3186	85.0673	27.7038
	14.6066	59.0397	27.389	85.162	27.7744
	14.6386	59.1677	27.4595	85.2562	27.8449
	14.6707	59.2955	27.5298	85.3499	27.9154
	14.7027	59.4231	27.6001	85.443	27.9858
	14.7347	59.5505	27.6703	85.5356	28.0561
	14.7668	59.6778	27.7405	85.6277	28.1265
	14.7988	59.8049	27.8106	85.7192	28.1967
	14.8308	59.9318	27.8807	85.8102	28.2669
	14.8629	60.0585	27.9507	85.9007	28.3371
	14.8949	60.1851	28.0206	85.9907	28.4072
	14.9269	60.3114	28.0905	86.0802	28.4772
	14.959	60.4376	28.1603	86.1691	28.5472
	14.991	60.5636	28.23	86.2576	28.6172
	15.023	60.6894	28.2997	86.3455	28.6871
	15.0551	60.8151	28.3693	86.4329	28.7569
	15.0871	60.9405	28.4389	86.5198	28.8266
	15.1191	61.0658	28.5083	86.6062	28.8964
	15.1512	61.1908	28.5778	86.6922	28.966
	15.1832	61.3157	28.6471	86.7776	29.0356
	15.2152	61.4404	28.7164	86.8625	29.1051
	15.2472	61.565	28.7856	86.9469	29.1746
	15.2793	61.6893	28.8547	87.0308	29.244
	15.3113	61.8134	28.9238	87.1143	29.3134
	15.3433	61.9374	28.9928	87.1973	29.3827
	15.3754	62.0612	29.0618	87.2797	29.4519
	15.4074	62.1847	29.1306	87.3617	29.5211
	15.4394	62.3081	29.1994	87.4432	29.5902
	15.4715	62.4313	29.2682	87.5243	29.6592
	15.5035	62.5543	29.3368	87.6048	29.7282
	15.5355	62.6771	29.4054	87.6849	29.7971
	15.5676	62.7997	29.4739	87.7646	29.8659
	15.5996	62.9222	29.5423	87.8437	29.9347
	15.6316	63.0444	29.6107	87.9224	30.0034
	15.6637	63.1664	29.679	88.0006	30.0721
	15.6957	63.2883	29.7472	88.0784	30.1407
	15.7277	63.4099	29.8153	88.1557	30.2092
	15.7598	63.5314	29.8834	88.2325	30.2777
	15.7918	63.6526	29.9514	88.3089	30.346
	15.8238	63.7737	30.0193	88.3848	30.4144
	15.8559	63.8945	30.0871	88.4603	30.4826
	15.8879	64.0152	30.1549	88.5354	30.5508
	15.9199	64.1356	30.2226	88.61	30.6189
	15.952	64.2559	30.2902	88.6841	30.6869
	15.984	64.3759	30.3577	88.7578	30.7549
	16.016	64.4958	30.4251	88.8311	30.8228
	16.048	64.6155	30.4925	88.9039	30.8906
	16.0801	64.7349	30.5598	88.9763	30.9584
	16.1121	64.8542	30.627	89.0483	31.0261
	16.1441	64.9732	30.6941	89.1198	31.0937
	16.1762	65.0921	30.7612	89.1909	31.1612
	16.2082	65.2107	30.8281	89.2616	31.2287
	16.2402	65.3292	30.895	89.3319	31.2961
	16.2723	65.4474	30.9618	89.4017	31.3634
	16.3043	65.5655	31.0285	89.4711	31.4307
	16.3363	65.6833	31.0952	89.5401	31.4979
	16.3684	65.8009	31.1617	89.6087	31.565
	16.4004	65.9184	31.2282	89.6769	31.632
	16.4324	66.0356	31.2946	89.7447	31.6989
	16.4645	66.1526	31.3609	89.812	31.7658
	16.4965	66.2694	31.4271	89.879	31.8326
	16.5285	66.386	31.4932	89.9455	31.8993
	16.5606	66.5024	31.5593	90.0116	31.9659
	16.5926	66.6186	31.6252	90.0774	32.0325
	16.6246	66.7346	31.6911	90.1427	32.099
	16.6567	66.8503	31.7569	90.2077	32.1654
	16.6887	66.9659	31.8226	90.2722	32.2317
	16.7207	67.0813	31.8882	90.3364	32.298
	16.7528	67.1964	31.9537	90.4002	32.3641
	16.7848	67.3114	32.0192	90.4635	32.4302
	16.8168	67.4261	32.0845	90.5265	32.4962
	16.8488	67.5406	32.1498	90.5892	32.5622
	16.8809	67.6549	32.215	90.6514	32.628
	16.9129	67.769	32.2801	90.7132	32.6938
	16.9449	67.8829	32.345	90.7747	32.7595
	16.977	67.9966	32.4099	90.8358	32.8251
	17.009	68.11	32.4748	90.8965	32.8906
	17.041	68.2233	32.5395	90.9569	32.9561
	17.0731	68.3363	32.6041	91.0169	33.0214
	17.1051	68.4492	32.6687	91.0765	33.0867
	17.1371	68.5618	32.7331	91.1358	33.1519
	17.1692	68.6742	32.7975	91.1946	33.217
	17.2012	68.7864	32.8617	91.2532	33.282
	17.2332	68.8984	32.9259	91.3113	33.347
	17.2653	69.0101	32.99	91.3691	33.4118
	17.2973	69.1217	33.054	91.4266	33.4766
	17.3293	69.233	33.1179	91.4837	33.5413
	17.3614	69.3441	33.1817	91.5405	33.6059
	17.3934	69.455	33.2454	91.5969	33.6704
	17.4254	69.5657	33.309	91.6529	33.7348
	17.4575	69.6762	33.3725	91.7086	33.7992
	17.4895	69.7865	33.436	91.764	33.8634
	17.5215	69.8965	33.4993	91.819	33.9276
	17.5536	70.0064	33.5625	91.8737	33.9917
	17.5856	70.116	33.6257	91.928	34.0557
	17.6176	70.2254	33.6887	91.982	34.1196
	17.6496	70.3346	33.7517	92.0357	34.1834
	17.6817	70.4436	33.8145	92.089	34.2471
	17.7137	70.5523	33.8773	92.142	34.3108
	17.7457	70.6609	33.94	92.1947	34.3743
	17.7778	70.7692	34.0025	92.2471	34.4378
	17.8098	70.8773	34.065	92.2991	34.5012
	17.8418	70.9852	34.1274	92.3508	34.5645
	17.8739	71.0928	34.1896	92.4022	34.6277
	17.9059	71.2003	34.2518	92.4532	34.6908
	17.9379	71.3075	34.3139	92.504	34.7538
	17.97	71.4146	34.3759	92.5544	34.8167
	18.002	71.5214	34.4377	92.6045	34.8795
	18.034	71.628	34.4995	92.6543	34.9423
	18.0661	71.7343	34.5612	92.7038	35.005
	18.0981	71.8405	34.6228	92.7529	35.0675
	18.1301	71.9464	34.6843	92.8018	35.13
	18.1622	72.0521	34.7457	92.8504	35.1924
	18.1942	72.1576	34.807	92.8986	35.2547
	18.2262	72.2629	34.8681	92.9466	35.3169
	18.2583	72.368	34.9292	92.9942	35.379
	18.2903	72.4728	34.9902	93.0416	35.441
	18.3223	72.5774	35.0511	93.0887	35.5029
	18.3544	72.6818	35.1119	93.1354	35.5647
	18.3864	72.786	35.1726	93.1819	35.6264
	18.4184	72.89	35.2332	93.2281	35.6881
	18.4505	72.9938	35.2936	93.274	35.7496
	18.4825	73.0973	35.354	93.3196	35.8111
	18.5145	73.2006	35.4143	93.3649	35.8724
	18.5465	73.3037	35.4745	93.4099	35.9337
	18.5786	73.4066	35.5346	93.4547	35.9949
	18.6106	73.5092	35.5945	93.4991	36.0559
	18.6426	73.6117	35.6544	93.5433	36.1169
	18.6747	73.7139	35.7142	93.5872	36.1778
	18.7067	73.8159	35.7738	93.6308	36.2386
	18.7387	73.9177	35.8334	93.6742	36.2993
	18.7708	74.0192	35.8929	93.7172	36.3599
	18.8028	74.1206	35.9522	93.7601	36.4204
	18.8348	74.2217	36.0115	93.8026	36.4808
	18.8669	74.3226	36.0706	93.8448	36.5411
	18.8989	74.4233	36.1297	93.8868	36.6013
	18.9309	74.5237	36.1886	93.9286	36.6614
	18.963	74.624	36.2474	93.97	36.7214
	18.995	74.724	36.3062	94.0112	36.7814
	19.027	74.8238	36.3648	94.0522	36.8412
	19.0591	74.9234	36.4233	94.0929	36.9009
	19.0911	75.0228	36.4818	94.1333	36.9605
	19.1231	75.1219	36.5401	94.1734	37.0201
	19.1552	75.2209	36.5983	94.2134	37.0795
	19.1872	75.3196	36.6564	94.253	37.1388
	19.2192	75.4181	36.7144	94.2924	37.1981
	19.2513	75.5163	36.7723	94.3316	37.2572
	19.2833	75.6144	36.8301	94.3705	37.3163
	19.3153	75.7122	36.8878	94.4091	37.3752
	19.3473	75.8098	36.9454	94.4475	37.4341
	19.3794	75.9072	37.0029	94.4857	37.4928
	19.4114	76.0044	37.0602	94.5236	37.5515
	19.4434	76.1014	37.1175	94.5613	37.61
	19.4755	76.1981	37.1747	94.5988	37.6685
	19.5075	76.2946	37.2317	94.636	37.7268
	19.5395	76.3909	37.2887	94.6729	37.7851
	19.5716	76.487	37.3455	94.7096	37.8432
	19.6036	76.5829	37.4022	94.7461	37.9013
	19.6356	76.6786	37.4589	94.7824	37.9592
	19.6677	76.774	37.5154	94.8184	38.0171
	19.6997	76.8692	37.5718	94.8542	38.0749
	19.7317	76.9642	37.6281	94.8898	38.1325
	19.7638	77.059	37.6843	94.9251	38.1901
	19.7958	77.1535	37.7404	94.9602	38.2475
	19.8278	77.2479	37.7964	94.9951	38.3049
	19.8599	77.342	37.8523	95.0298	38.3621
	19.8919	77.4359	37.9081	95.0642	38.4193
	19.9239	77.5296	37.9638	95.0984	38.4763
	19.956	77.6231	38.0193	95.1324	38.5333
	19.988	77.7163	38.0748	95.1662	38.5901
	20.02	77.8093	38.1301	95.1998	38.6469
	20.0521	77.9022	38.1854	95.2331	38.7035
	20.0841	77.9948	38.2405	95.2663	38.7601
	20.1161	78.0872	38.2955	95.2992	38.8165
	20.1481	78.1793	38.3505	95.3319	38.8729
	20.1802	78.2713	38.4053	95.3644	38.9291
	20.2122	78.363	38.46	95.3967	38.9853
	20.2442	78.4545	38.5146	95.4288	39.0413
	20.2763	78.5458	38.5691	95.4606	39.0973
	20.3083	78.6369	38.6234	95.4923	39.1531
	20.3403	78.7278	38.6777	95.5238	39.2088
	20.3724	78.8184	38.7319	95.555	39.2645
	20.4044	78.9089	38.7859	95.5861	39.32
	20.4364	78.9991	38.8399	95.6169	39.3755
	20.4685	79.0891	38.8937	95.6476	39.4308
	20.5005	79.1789	38.9475	95.6781	39.486
	20.5325	79.2685	39.0011	95.7083	39.5411
	20.5646	79.3579	39.0546	95.7384	39.5962
	20.5966	79.447	39.108	95.7683	39.6511
	20.6286	79.5359	39.1613	95.7979	39.7059
	20.6607	79.6247	39.2145	95.8274	39.7606
	20.6927	79.7132	39.2676	95.8567	39.8152
	20.7247	79.8014	39.3206	95.8858	39.8698
	20.7568	79.8895	39.3735	95.9148	39.9242
	20.7888	79.9774	39.4262	95.9435	39.9785
	20.8208	80.065	39.4789	95.972	40.0327
	20.8529	80.1525	39.5314	96.0004	40.0868
	20.8849	80.2397	39.5839	96.0286	40.1408
	20.9169	80.3267	39.6362	96.0566	40.1947
	20.9489	80.4135	39.6884	96.0844	40.2485
	20.981	80.5001	39.7405	96.112	40.3022
	21.013	80.5865	39.7925	96.1395	40.3558
	21.045	80.6726	39.8444	96.1667	40.4092
	21.0771	80.7586	39.8962	96.1938	40.4626
	21.1091	80.8443	39.9479	96.2208	40.5159
	21.1411	80.9298	39.9994	96.2475	40.5691
	21.1732	81.0152	40.0509	96.2741	40.6222
	21.2052	81.1003	40.1023	96.3005	40.6751
	21.2372	81.1851	40.1535	96.3267	40.728
	21.2693	81.2698	40.2046	96.3528	40.7808
	21.3013	81.3543	40.2557	96.3787	40.8334
	21.3333	81.4386	40.3066	96.4044	40.886
	21.3654	81.5226	40.3574	96.4299	40.9384
	21.3974	81.6064	40.4081	96.4553	40.9908
	21.4294	81.6901	40.4587	96.4805	41.043
	21.4615	81.7735	40.5092	96.5056	41.0952
	21.4935	81.8567	40.5596	96.5305	41.1472
	21.5255	81.9397	40.6099	96.5552	41.1992
	21.5576	82.0225	40.66	96.5798	41.251
	21.5896	82.1051	40.7101	96.6042	41.3028
	21.6216	82.1875	40.76	96.6284	41.3544
	21.6537	82.2696	40.8099	96.6525	41.4059
	21.6857	82.3516	40.8596	96.6764	41.4573
	21.7177	82.4333	40.9092	96.7002	41.5087
	21.7497	82.5149	40.9587	96.7238	41.5599
	21.7818	82.5962	41.0081	96.7473	41.611
	21.8138	82.6774	41.0574	96.7706	41.662
	21.8458	82.7583	41.1066	96.7938	41.7129
	21.8779	82.839	41.1557	96.8168	41.7637
	21.9099	82.9195	41.2047	96.8396	41.8144
	21.9419	82.9998	41.2535	96.8624	41.865
	21.974	83.0799	41.3023	96.8849	41.9155
	22.006	83.1598	41.351	96.9073	41.9659
	22.038	83.2395	41.3995	96.9296	42.0162
	22.0701	83.319	41.4479	96.9517	42.0664
	22.1021	83.3983	41.4963	96.9737	42.1165
	22.1341	83.4773	41.5445	96.9955	42.1665
	22.1662	83.5562	41.5926	97.0172	42.2163
	22.1982	83.6349	41.6406	97.0387	42.2661
	22.2302	83.7133	41.6885	97.0601	42.3158
	22.2623	83.7916	41.7363	97.0814	42.3654
	22.2943	83.8697	41.784	97.1025	42.4148
	22.3263	83.9475	41.8316	97.1235	42.4642
	22.3584	84.0252	41.879	97.1444	42.5134
	22.3904	84.1026	41.9264	97.1651	42.5626
	22.4224	84.1799	41.9737	97.1857	42.6117
	22.4545	84.2569	42.0208	97.2061	42.6606
	22.4865	84.3338	42.0679	97.2264	42.7095
	22.5185	84.4104	42.1148	97.2466	42.7582
	22.5506	84.4869	42.1616	97.2666	42.8069
	22.5826	84.5631	42.2084	97.2865	42.8554
	22.6146	84.6391	42.255	97.3063	42.9038
	22.6466	84.715	42.3015	97.3259	42.9522
	22.6787	84.7906	42.3479	97.3455	43.0004
	22.7107	84.8661	42.3942	97.3648	43.0485
	22.7427	84.9413	42.4404	97.3841	43.0966
	22.7748	85.0164	42.4865	97.4032	43.1445
	22.8068	85.0912	42.5324	97.4222	43.1923
	22.8388	85.1659	42.5783	97.4411	43.24
	22.8709	85.2403	42.6241	97.4599	43.2877
	22.9029	85.3146	42.6697	97.4785	43.3352
	22.9349	85.3886	42.7153	97.497	43.3826
	22.967	85.4625	42.7607	97.5154	43.4299
	22.999	85.5361	42.8061	97.5337	43.4771
	23.031	85.6096	42.8513	97.5518	43.5242
	23.0631	85.6829	42.8964	97.5699	43.5712
	23.0951	85.7559	42.9415	97.5878	43.6181
	23.1271	85.8288	42.9864	97.6056	43.6649
	23.1592	85.9015	43.0312	97.6232	43.7116
	23.1912	85.974	43.0759	97.6408	43.7582
	23.2232	86.0463	43.1205	97.6582	43.8047
	23.2553	86.1184	43.165	97.6756	43.8511
	23.2873	86.1903	43.2094	97.6928	43.8974
	23.3193	86.262	43.2537	97.7099	43.9436
	23.3514	86.3335	43.2979	97.7269	43.9897
	23.3834	86.4048	43.342	97.7437	44.0357
	23.4154	86.476	43.386	97.7605	44.0816
	23.4474	86.5469	43.4298	97.7772	44.1274
	23.4795	86.6177	43.4736	97.7937	44.1731
	23.5115	86.6882	43.5173	97.8101	44.2187
	23.5435	86.7586	43.5608	97.8265	44.2641
	23.5756	86.8288	43.6043	97.8427	44.3095
	23.6076	86.8987	43.6476	97.8588	44.3548
	23.6396	86.9685	43.6909	97.8748	44.4
	23.6717	87.0381	43.734	97.8907	44.4451
	23.7037	87.1075	43.7771	97.9065	44.4901
	23.7357	87.1768	43.82	97.9222	44.5349
	23.7678	87.2458	43.8628	97.9377	44.5797
	23.7998	87.3146	43.9056	97.9532	44.6244
	23.8318	87.3833	43.9482	97.9686	44.669
	23.8639	87.4518	43.9907	97.9839	44.7135
	23.8959	87.52	44.0331	97.999	44.7578
	23.9279	87.5881	44.0754	98.0141	44.8021
	23.96	87.656	44.1177	98.0291	44.8463
	23.992	87.7238	44.1598	98.044	44.8904
	24.024	87.7913	44.2018	98.0587	44.9344
	24.0561	87.8586	44.2437	98.0734	44.9782
	24.0881	87.9258	44.2855	98.088	45.022
	24.1201	87.9928	44.3272	98.1025	45.0657
	24.1522	88.0595	44.3688	98.1169	45.1093
	24.1842	88.1261	44.4103	98.1312	45.1528
	24.2162	88.1926	44.4517	98.1454	45.1961
	24.2482	88.2588	44.493	98.1595	45.2394
	24.2803	88.3248	44.5342	98.1735	45.2826
	24.3123	88.3907	44.5753	98.1874	45.3257
	24.3443	88.4564	44.6163	98.2012	45.3687
	24.3764	88.5219	44.6572	98.2149	45.4116
	24.4084	88.5872	44.6979	98.2286	45.4544
	24.4404	88.6523	44.7386	98.2421	45.497
	24.4725	88.7173	44.7792	98.2556	45.5396
	24.5045	88.7821	44.8197	98.269	45.5821
	24.5365	88.8467	44.8601	98.2822	45.6245
	24.5686	88.9111	44.9004	98.2954	45.6668
	24.6006	88.9753	44.9406	98.3085	45.709
	24.6326	89.0393	44.9806	98.3216	45.7511
	24.6647	89.1032	45.0206	98.3345	45.7931
	24.6967	89.1669	45.0605	98.3473	45.835
	24.7287	89.2304	45.1003	98.3601	45.8768
	24.7608	89.2937	45.14	98.3728	45.9186
	24.7928	89.3569	45.1796	98.3854	45.9602
	24.8248	89.4199	45.2191	98.3979	46.0017
	24.8569	89.4827	45.2584	98.4103	46.0431
	24.8889	89.5453	45.2977	98.4226	46.0844
	24.9209	89.6077	45.3369	98.4349	46.1256
	24.953	89.67	45.376	98.4471	46.1668
	24.985	89.7321	45.415	98.4592	46.2078
	25.017	89.794	45.4539	98.4712	46.2487
	25.049	89.8557	45.4927	98.4831	46.2896
	25.0811	89.9173	45.5314	98.495	46.3303
	25.1131	89.9787	45.57	98.5068	46.3709
	25.1451	90.0399	45.6085	98.5185	46.4115
	25.1772	90.1009	45.6469	98.5301	46.4519
	25.2092	90.1618	45.6852	98.5416	46.4923
	25.2412	90.2225	45.7234	98.5531	46.5326
	25.2733	90.283	45.7615	98.5645	46.5727
	25.3053	90.3433	45.7995	98.5758	46.6128
	25.3373	90.4035	45.8374	98.587	46.6528
	25.3694	90.4635	45.8752	98.5982	46.6926
	25.4014	90.5233	45.9129	98.6093	46.7324
	25.4334	90.583	45.9506	98.6203	46.7721
	25.4655	90.6425	45.9881	98.6313	46.8117
	25.4975	90.7018	46.0255	98.6421	46.8512
	25.5295	90.7609	46.0629	98.6529	46.8906
	25.5616	90.8199	46.1001	98.6637	46.9299
	25.5936	90.8787	46.1372	98.6743	46.9691
	25.6256	90.9374	46.1743	98.6849	47.0082
	25.6577	90.9958	46.2112	98.6954	47.0472
	25.6897	91.0541	46.2481	98.7059	47.0862
	25.7217	91.1122	46.2848	98.7162	47.125
	25.7538	91.1702	46.3215	98.7265	47.1637
	25.7858	91.228	46.3581	98.7368	47.2024
	25.8178	91.2856	46.3945	98.7469	47.2409
	25.8498	91.3431	46.4309	98.757	47.2794
	25.8819	91.4004	46.4672	98.7671	47.3178
	25.9139	91.4575	46.5034	98.777	47.356
	25.9459	91.5145	46.5395	98.7869	47.3942
	25.978	91.5713	46.5755	98.7968	47.4323
	26.01	91.6279	46.6114	98.8065	47.4703
	26.042	91.6843	46.6472	98.8162	47.5082
	26.0741	91.7406	46.6829	98.8259	47.546
	26.1061	91.7968	46.7185	98.8354	47.5837
	26.1381	91.8528	46.7541	98.8449	47.6213
	26.1702	91.9086	46.7895	98.8544	47.6589
	26.2022	91.9642	46.8249	98.8638	47.6963
	26.2342	92.0197	46.8601	98.8731	47.7336
	26.2663	92.075	46.8953	98.8823	47.7709
	26.2983	92.1302	46.9303	98.8915	47.8081
	26.3303	92.1852	46.9653	98.9007	47.8451
	26.3624	92.24	47.0002	98.9097	47.8821
	26.3944	92.2947	47.035	98.9187	47.919
	26.4264	92.3492	47.0697	98.9277	47.9558
	26.4585	92.4036	47.1043	98.9366	47.9925
	26.4905	92.4578	47.1388	98.9454	48.0291
	26.5225	92.5118	47.1732	98.9542	48.0656
	26.5546	92.5657	47.2075	98.9629	48.1021
	26.5866	92.6194	47.2418	98.9715	48.1384
	26.6186	92.6729	47.2759	98.9801	48.1746
	26.6507	92.7264	47.31	98.9887	48.2108
	26.6827	92.7796	47.3439	98.9972	48.2469
	26.7147	92.8327	47.3778	99.0056	48.2828
	26.7467	92.8856	47.4116	99.014	48.3187
	26.7788	92.9384	47.4453	99.0223	48.3545
	26.8108	92.991	47.4789	99.0305	48.3902
	26.8428	93.0435	47.5124	99.0387	48.4259
	26.8749	93.0958	47.5458	99.0469	48.4614
	26.9069	93.1479	47.5791	99.055	48.4968
	26.9389	93.1999	47.6124	99.063	48.5322
	26.971	93.2518	47.6455	99.071	48.5675
	27.003	93.3035	47.6786	99.0789	48.6026
	27.035	93.355	47.7116	99.0868	48.6377
	27.0671	93.4064	47.7445	99.0946	48.6727
	27.0991	93.4576	47.7773	99.1024	48.7076
	27.1311	93.5087	47.81	99.1101	48.7424
	27.1632	93.5596	47.8426	99.1178	48.7772
	27.1952	93.6104	47.8751	99.1254	48.8118
	27.2272	93.661	47.9076	99.133	48.8464
	27.2593	93.7115	47.9399	99.1405	48.8808
	27.2913	93.7618	47.9722	99.148	48.9152
	27.3233	93.8119	48.0044	99.1554	48.9495
	27.3554	93.862	48.0365	99.1627	48.9837
	27.3874	93.9118	48.0685	99.1701	49.0178
	27.4194	93.9615	48.1004	99.1773	49.0519
	27.4515	94.0111	48.1322	99.1845	49.0858
	27.4835	94.0605	48.164	99.1917	49.1197
	27.5155	94.1098	48.1956	99.1988	49.1534
	27.5475	94.1589	48.2272	99.2059	49.1871
	27.5796	94.2079	48.2587	99.2129	49.2207
	27.6116	94.2567	48.2901	99.2199	49.2542
	27.6436	94.3054	48.3214	99.2268	49.2877
	27.6757	94.354	48.3526	99.2337	49.321
	27.7077	94.4024	48.3838	99.2406	49.3543
	27.7397	94.4506	48.4148	99.2474	49.3874
	27.7718	94.4987	48.4458	99.2541	49.4205
	27.8038	94.5466	48.4767	99.2608	49.4535
	27.8358	94.5945	48.5075	99.2675	49.4864
	27.8679	94.6421	48.5382	99.2741	49.5193
	27.8999	94.6896	48.5689	99.2807	49.552
	27.9319	94.737	48.5994	99.2872	49.5847
	27.964	94.7843	48.6299	99.2937	49.6173
	27.996	94.8313	48.6602	99.3001	49.6497
	28.028	94.8783	48.6905	99.3065	49.6822
	28.0601	94.9251	48.7208	99.3129	49.7145
	28.0921	94.9718	48.7509	99.3192	49.7467
	28.1241	95.0183	48.7809	99.3254	49.7789
	28.1562	95.0647	48.8109	99.3317	49.8109
	28.1882	95.1109	48.8408	99.3378	49.8429
	28.2202	95.157	48.8706	99.344	49.8748
	28.2523	95.203	48.9003	99.3501	49.9067
	28.2843	95.2488	48.9299	99.3561	49.9384
	28.3163	95.2944	48.9595	99.3622	49.9701
	28.3483	95.34	48.9889	99.3681	50.0016
	28.3804	95.3854	49.0183	99.3741	50.0331
	28.4124	95.4307	49.0476	99.38	50.0645
	28.4444	95.4758	49.0768	99.3858	50.0959
	28.4765	95.5208	49.106	99.3916	50.1271
	28.5085	95.5656	49.135	99.3974	50.1583
	28.5405	95.6103	49.164	99.4032	50.1894
	28.5726	95.6549	49.1929	99.4089	50.2204
	28.6046	95.6993	49.2217	99.4145	50.2513
	28.6366	95.7436	49.2504	99.4202	50.2821
	28.6687	95.7878	49.2791	99.4257	50.3129
	28.7007	95.8318	49.3077	99.4313	50.3435
	28.7327	95.8757	49.3362	99.4368	50.3741
	28.7648	95.9195	49.3646	99.4423	50.4046
	28.7968	95.9631	49.3929	99.4477	50.4351
	28.8288	96.0066	49.4212	99.4531	50.4654
	28.8609	96.05	49.4493	99.4585	50.4957
	28.8929	96.0932	49.4774	99.4638	50.5259
	28.9249	96.1363	49.5054	99.4691	50.556
	28.957	96.1793	49.5334	99.4744	50.586
	28.989	96.2221	49.5612	99.4796	50.616
	29.021	96.2648	49.589	99.4848	50.6459
	29.0531	96.3073	49.6167	99.4899	50.6757
	29.0851	96.3498	49.6443	99.4951	50.7054
	29.1171	96.3921	49.6719	99.5001	50.735
	29.1491	96.4342	49.6993	99.5052	50.7646
	29.1812	96.4763	49.7267	99.5102	50.794
	29.2132	96.5182	49.754	99.5152	50.8234
	29.2452	96.56	49.7813	99.5201	50.8528
	29.2773	96.6016	49.8084	99.5251	50.882
	29.3093	96.6432	49.8355	99.5299	50.9112
	29.3413	96.6846	49.8625	99.5348	50.9403
	29.3734	96.7258	49.8894	99.5396	50.9693
	29.4054	96.767	49.9163	99.5444	50.9982
	29.4374	96.808	49.943	99.5491	51.0271
	29.4695	96.8489	49.9697	99.5539	51.0558
	29.5015	96.8896	49.9963	99.5586	51.0845
	29.5335	96.9302	50.0229	99.5632	51.1132
	29.5656	96.9707	50.0494	99.5678	51.1417
	29.5976	97.0111	50.0757	99.5724	51.1702
	29.6296	97.0514	50.1021	99.577	51.1986
	29.6617	97.0915	50.1283	99.5815	51.2269
	29.6937	97.1315	50.1545	99.586	51.2551
	29.7257	97.1714	50.1806	99.5905	51.2833
	29.7578	97.2111	50.2066	99.5949	51.3114
	29.7898	97.2508	50.2325	99.5994	51.3394
	29.8218	97.2903	50.2584	99.6037	51.3673
	29.8539	97.3297	50.2842	99.6081	51.3952
	29.8859	97.3689	50.3099	99.6124	51.423
	29.9179	97.4081	50.3355	99.6167	51.4507
	29.9499	97.4471	50.3611	99.621	51.4783
	29.982	97.486	50.3866	99.6252	51.5059
	30.014	97.5247	50.412	99.6294	51.5334
	30.046	97.5634	50.4374	99.6336	51.5608
	30.0781	97.6019	50.4626	99.6377	51.5881
	30.1101	97.6403	50.4878	99.6419	51.6154
	30.1421	97.6786	50.513	99.646	51.6426
	30.1742	97.7168	50.538	99.65	51.6697
	30.2062	97.7548	50.563	99.6541	51.6967
	30.2382	97.7928	50.5879	99.6581	51.7237
	30.2703	97.8306	50.6128	99.6621	51.7506
	30.3023	97.8683	50.6375	99.666	51.7774
	30.3343	97.9058	50.6622	99.67	51.8042
	30.3664	97.9433	50.6869	99.6739	51.8308
	30.3984	97.9806	50.7114	99.6778	51.8574
	30.4304	98.0178	50.7359	99.6816	51.884
	30.4625	98.0549	50.7603	99.6854	51.9104
	30.4945	98.0919	50.7847	99.6892	51.9368
	30.5265	98.1288	50.8089	99.693	51.9631
	30.5586	98.1656	50.8331	99.6968	51.9894
	30.5906	98.2022	50.8572	99.7005	52.0155
	30.6226	98.2387	50.8813	99.7042	52.0416
	30.6547	98.2751	50.9053	99.7079	52.0677
	30.6867	98.3114	50.9292	99.7115	52.0936
	30.7187	98.3476	50.9531	99.7151	52.1195
	30.7508	98.3836	50.9768	99.7188	52.1453
	30.7828	98.4196	51.0006	99.7223	52.171
	30.8148	98.4554	51.0242	99.7259	52.1967
	30.8468	98.4912	51.0478	99.7294	52.2223
	30.8789	98.5268	51.0713	99.7329	52.2478
	30.9109	98.5623	51.0947	99.7364	52.2733
	30.9429	98.5976	51.1181	99.7399	52.2987
	30.975	98.6329	51.1414	99.7433	52.324
	31.007	98.6681	51.1646	99.7467	52.3493
	31.039	98.7031	51.1878	99.7501	52.3744
	31.0711	98.7381	51.2108	99.7535	52.3995
	31.1031	98.7729	51.2339	99.7568	52.4246
	31.1351	98.8076	51.2568	99.7601	52.4496
	31.1672	98.8422	51.2797	99.7634	52.4745
	31.1992	98.8767	51.3025	99.7667	52.4993
	31.2312	98.9111	51.3253	99.77	52.5241
	31.2633	98.9454	51.348	99.7732	52.5487
	31.2953	98.9795	51.3706	99.7764	52.5734
	31.3273	99.0136	51.3932	99.7796	52.5979
	31.3594	99.0476	51.4156	99.7828	52.6224
	31.3914	99.0814	51.4381	99.7859	52.6468
	31.4234	99.1151	51.4604	99.789	52.6712
	31.4555	99.1488	51.4827	99.7921	52.6955
	31.4875	99.1823	51.5049	99.7952	52.7197
	31.5195	99.2157	51.5271	99.7983	52.7438
	31.5516	99.249	51.5492	99.8013	52.7679
	31.5836	99.2822	51.5712	99.8043	52.7919
	31.6156	99.3153	51.5932	99.8073	52.8159
	31.6476	99.3483	51.6151	99.8103	52.8398
	31.6797	99.3812	51.6369	99.8133	52.8636
	31.7117	99.4139	51.6587	99.8162	52.8873
	31.7437	99.4466	51.6804	99.8191	52.911
	31.7758	99.4792	51.702	99.822	52.9346
	31.8078	99.5117	51.7236	99.8249	52.9582
	31.8398	99.544	51.7451	99.8278	52.9817
	31.8719	99.5763	51.7665	99.8306	53.0051
	31.9039	99.6084	51.7879	99.8334	53.0285
	31.9359	99.6405	51.8092	99.8362	53.0517
	31.968	99.6724	51.8305	99.839	53.075
	32	99.7043	51.8517	99.8418	53.0981
Fig. 6I	date
		WT			Slmapk3			SlMPK3-OE			WT SlIDL6			Slmapk3 SlIDL6			SlMPK3-OE SlIDL6
	0 h	0	0	0	0	0	0	0	0	0	0	0	0	0	0	0	0	0	0
	8 h	32	31.25	35.4839	21.4286	25	18.4211	48.4849	45.7143	51.6129	48	50	54.8387	20.6897	25.7143	23.5294	75.7576	77.1429	80.6452
	16 h	52	53.125	61.2903	39.2857	43.75	36.8421	78.7879	82.8571	77.4193	84	75	80.6452	41.3793	40	44.1176	96.9697	97.1429	96.7742
	24 h	88	84.375	87.0968	53.5714	50	47.3684	100	100	100	100	100	100	51.7241	51.4286	52.9412	100	100	100
	32 h	100	100	100	67.8571	62.5	55.2632	100	100	100	100	100	100	65.5172	57.1429	61.7647	100	100	100
	Gompertz growth
	Best-fit values
	YM	115	64.64	101.5	100.9	62.55	99.43
	Y0	5.216	3.228	3.618	3.953	3.04	0.5231
	K	0.09686	0.1142	0.1794	0.1833	0.1282	0.3822
	1/K	10.32	8.758	5.575	5.455	7.8	2.617
	95% CI (profile likelihood)
	YM	101.9 to 137.1	56.29 to 80.70	97.10 to 106.4	95.92 to 106.6	57.07 to 70.58	98.41 to 100.5
	Y0	2.076 to 9.359	0.5644 to 7.256	1.036 to 7.111	0.8390 to 8.241	0.8594 to 6.026	1.139e-014 to 1.982
	K	0.07197 to 0.1260	0.07364 to 0.1711	0.1489 to 0.2217	0.1473 to 0.2369	0.09497 to 0.1727	0.3422 to 0.6281
	1/K	7.935 to 13.89	5.845 to 13.58	4.511 to 6.715	4.222 to 6.787	5.792 to 10.53	1.592 to 2.923
	Goodness of Fit
	Degrees of Freedom	12	12	12	12	12	12
	R squared	0.9851	0.9685	0.9917	0.9884	0.9822	0.999
	Sum of Squares	292.2	230.1	178	246.7	129.3	21.04
	Sy.x	4.935	4.379	3.852	4.534	3.283	1.324
	Constraints
	Y0	Y0 > 0	Y0 > 0	Y0 > 0	Y0 > 0	Y0 > 0	Y0 > 0
	K	K > 0	K > 0	K > 0	K > 0	K > 0	K > 0
	Number of points
	# of X values	15	15	15	15	15	15
	# Y values analyzed	15	15	15	15	15	15
	Two-way ANOVA	Ordinary
	Alpha	0.05
	Source of Variation	% of total variation	P value	P value summary	Significant?
	Interaction	6.803	<0.0001	****	Yes
	Row Factor	75.22	<0.0001	****	Yes
	Column Factor	17.66	<0.0001	****	Yes
	ANOVA table	SS	DF	MS	F (DFn, DFd)	P value
	Interaction	8191	20	409.6	F (20, 60) = 63.91	P<0.0001
	Row Factor	90573	4	22643	F (4, 60) = 3533	P<0.0001
	Column Factor	21258	5	4252	F (5, 60) = 663.5	P<0.0001
	Residual	384.5	60	6.408
	Data summary
	Number of columns (Column Factor)	6
	Number of rows (Row Factor)	5
	Number of values	90
	Within each row, compare columns (simple effects within rows)
	Number of families	5
	Number of comparisons per family	15
	Alpha	0.05
	Tukey's multiple comparisons test	Mean Diff.	95.00% CI of diff.	Significant?	Summary	Adjusted P Value
	0
	WT vs. Slmapk3	0	-6.085 to 6.085	No	ns	>0.9999
	WT vs. SlMPK3-OE	0	-6.085 to 6.085	No	ns	>0.9999
	WT vs. WT SlIDL6	0	-6.085 to 6.085	No	ns	>0.9999
	WT vs. Slmapk3 SlIDL6	0	-6.085 to 6.085	No	ns	>0.9999
	WT vs. SlMPK3-OE SlIDL6	0	-6.085 to 6.085	No	ns	>0.9999
	Slmapk3 vs. SlMPK3-OE	0	-6.085 to 6.085	No	ns	>0.9999
	Slmapk3 vs. WT SlIDL6	0	-6.085 to 6.085	No	ns	>0.9999
	Slmapk3 vs. Slmapk3 SlIDL6	0	-6.085 to 6.085	No	ns	>0.9999
	Slmapk3 vs. SlMPK3-OE SlIDL6	0	-6.085 to 6.085	No	ns	>0.9999
	SlMPK3-OE vs. WT SlIDL6	0	-6.085 to 6.085	No	ns	>0.9999
	SlMPK3-OE vs. Slmapk3 SlIDL6	0	-6.085 to 6.085	No	ns	>0.9999
	SlMPK3-OE vs. SlMPK3-OE SlIDL6	0	-6.085 to 6.085	No	ns	>0.9999
	WT SlIDL6 vs. Slmapk3 SlIDL6	0	-6.085 to 6.085	No	ns	>0.9999
	WT SlIDL6 vs. SlMPK3-OE SlIDL6	0	-6.085 to 6.085	No	ns	>0.9999
	Slmapk3 SlIDL6 vs. SlMPK3-OE SlIDL6	0	-6.085 to 6.085	No	ns	>0.9999
	8
	WT vs. Slmapk3	11.29	5.210 to 17.38	Yes	****	<0.0001
	WT vs. SlMPK3-OE	-15.69	-21.78 to -9.608	Yes	****	<0.0001
	WT vs. WT SlIDL6	-18.03	-24.12 to -11.95	Yes	****	<0.0001
	WT vs. Slmapk3 SlIDL6	9.6	3.516 to 15.68	Yes	***	0.0003
	WT vs. SlMPK3-OE SlIDL6	-44.94	-51.02 to -38.85	Yes	****	<0.0001
	Slmapk3 vs. SlMPK3-OE	-26.99	-33.07 to -20.90	Yes	****	<0.0001
	Slmapk3 vs. WT SlIDL6	-29.33	-35.41 to -23.25	Yes	****	<0.0001
	Slmapk3 vs. Slmapk3 SlIDL6	-1.695	-7.779 to 4.390	No	ns	0.9627
	Slmapk3 vs. SlMPK3-OE SlIDL6	-56.23	-62.32 to -50.15	Yes	****	<0.0001
	SlMPK3-OE vs. WT SlIDL6	-2.342	-8.427 to 3.742	No	ns	0.8656
	SlMPK3-OE vs. Slmapk3 SlIDL6	25.29	19.21 to 31.38	Yes	****	<0.0001
	SlMPK3-OE vs. SlMPK3-OE SlIDL6	-29.24	-35.33 to -23.16	Yes	****	<0.0001
	WT SlIDL6 vs. Slmapk3 SlIDL6	27.64	21.55 to 33.72	Yes	****	<0.0001
	WT SlIDL6 vs. SlMPK3-OE SlIDL6	-26.9	-32.99 to -20.82	Yes	****	<0.0001
	Slmapk3 SlIDL6 vs. SlMPK3-OE SlIDL6	-54.54	-60.62 to -48.45	Yes	****	<0.0001
	16
	WT vs. Slmapk3	15.51	9.428 to 21.60	Yes	****	<0.0001
	WT vs. SlMPK3-OE	-24.22	-30.30 to -18.13	Yes	****	<0.0001
	WT vs. WT SlIDL6	-24.41	-30.49 to -18.33	Yes	****	<0.0001
	WT vs. Slmapk3 SlIDL6	13.64	7.555 to 19.72	Yes	****	<0.0001
	WT vs. SlMPK3-OE SlIDL6	-41.49	-47.58 to -35.41	Yes	****	<0.0001
	Slmapk3 vs. SlMPK3-OE	-39.73	-45.81 to -33.64	Yes	****	<0.0001
	Slmapk3 vs. WT SlIDL6	-39.92	-46.01 to -33.84	Yes	****	<0.0001
	Slmapk3 vs. Slmapk3 SlIDL6	-1.873	-7.958 to 4.212	No	ns	0.9434
	Slmapk3 vs. SlMPK3-OE SlIDL6	-57	-63.09 to -50.92	Yes	****	<0.0001
	SlMPK3-OE vs. WT SlIDL6	-0.1936	-6.278 to 5.891	No	ns	>0.9999
	SlMPK3-OE vs. Slmapk3 SlIDL6	37.86	31.77 to 43.94	Yes	****	<0.0001
	SlMPK3-OE vs. SlMPK3-OE SlIDL6	-17.27	-23.36 to -11.19	Yes	****	<0.0001
	WT SlIDL6 vs. Slmapk3 SlIDL6	38.05	31.96 to 44.13	Yes	****	<0.0001
	WT SlIDL6 vs. SlMPK3-OE SlIDL6	-17.08	-23.17 to -11.00	Yes	****	<0.0001
	Slmapk3 SlIDL6 vs. SlMPK3-OE SlIDL6	-55.13	-61.21 to -49.05	Yes	****	<0.0001
	24
	WT vs. Slmapk3	36.18	30.09 to 42.26	Yes	****	<0.0001
	WT vs. SlMPK3-OE	-13.51	-19.59 to -7.425	Yes	****	<0.0001
	WT vs. WT SlIDL6	-13.51	-19.59 to -7.425	Yes	****	<0.0001
	WT vs. Slmapk3 SlIDL6	34.46	28.37 to 40.54	Yes	****	<0.0001
	WT vs. SlMPK3-OE SlIDL6	-13.51	-19.59 to -7.425	Yes	****	<0.0001
	Slmapk3 vs. SlMPK3-OE	-49.69	-55.77 to -43.60	Yes	****	<0.0001
	Slmapk3 vs. WT SlIDL6	-49.69	-55.77 to -43.60	Yes	****	<0.0001
	Slmapk3 vs. Slmapk3 SlIDL6	-1.718	-7.803 to 4.367	No	ns	0.9605
	Slmapk3 vs. SlMPK3-OE SlIDL6	-49.69	-55.77 to -43.60	Yes	****	<0.0001
	SlMPK3-OE vs. WT SlIDL6	0	-6.085 to 6.085	No	ns	>0.9999
	SlMPK3-OE vs. Slmapk3 SlIDL6	47.97	41.88 to 54.05	Yes	****	<0.0001
	SlMPK3-OE vs. SlMPK3-OE SlIDL6	0	-6.085 to 6.085	No	ns	>0.9999
	WT SlIDL6 vs. Slmapk3 SlIDL6	47.97	41.88 to 54.05	Yes	****	<0.0001
	WT SlIDL6 vs. SlMPK3-OE SlIDL6	0	-6.085 to 6.085	No	ns	>0.9999
	Slmapk3 SlIDL6 vs. SlMPK3-OE SlIDL6	-47.97	-54.05 to -41.88	Yes	****	<0.0001
	32
	WT vs. Slmapk3	38.13	32.04 to 44.21	Yes	****	<0.0001
	WT vs. SlMPK3-OE	0	-6.085 to 6.085	No	ns	>0.9999
	WT vs. WT SlIDL6	0	-6.085 to 6.085	No	ns	>0.9999
	WT vs. Slmapk3 SlIDL6	38.53	32.44 to 44.61	Yes	****	<0.0001
	WT vs. SlMPK3-OE SlIDL6	0	-6.085 to 6.085	No	ns	>0.9999
	Slmapk3 vs. SlMPK3-OE	-38.13	-44.21 to -32.04	Yes	****	<0.0001
	Slmapk3 vs. WT SlIDL6	-38.13	-44.21 to -32.04	Yes	****	<0.0001
	Slmapk3 vs. Slmapk3 SlIDL6	0.3985	-5.686 to 6.483	No	ns	>0.9999
	Slmapk3 vs. SlMPK3-OE SlIDL6	-38.13	-44.21 to -32.04	Yes	****	<0.0001
	SlMPK3-OE vs. WT SlIDL6	0	-6.085 to 6.085	No	ns	>0.9999
	SlMPK3-OE vs. Slmapk3 SlIDL6	38.53	32.44 to 44.61	Yes	****	<0.0001
	SlMPK3-OE vs. SlMPK3-OE SlIDL6	0	-6.085 to 6.085	No	ns	>0.9999
	WT SlIDL6 vs. Slmapk3 SlIDL6	38.53	32.44 to 44.61	Yes	****	<0.0001
	WT SlIDL6 vs. SlMPK3-OE SlIDL6	0	-6.085 to 6.085	No	ns	>0.9999
	Slmapk3 SlIDL6 vs. SlMPK3-OE SlIDL6	-38.53	-44.61 to -32.44	Yes	****	<0.0001
	Test details	Mean 1	Mean 2	Mean Diff.	SE of diff.	N1	N2	q	DF
	0
	WT vs. Slmapk3	0	0	0	2.067	3	3	0	60
	WT vs. SlMPK3-OE	0	0	0	2.067	3	3	0	60
	WT vs. WT SlIDL6	0	0	0	2.067	3	3	0	60
	WT vs. Slmapk3 SlIDL6	0	0	0	2.067	3	3	0	60
	WT vs. SlMPK3-OE SlIDL6	0	0	0	2.067	3	3	0	60
	Slmapk3 vs. SlMPK3-OE	0	0	0	2.067	3	3	0	60
	Slmapk3 vs. WT SlIDL6	0	0	0	2.067	3	3	0	60
	Slmapk3 vs. Slmapk3 SlIDL6	0	0	0	2.067	3	3	0	60
	Slmapk3 vs. SlMPK3-OE SlIDL6	0	0	0	2.067	3	3	0	60
	SlMPK3-OE vs. WT SlIDL6	0	0	0	2.067	3	3	0	60
	SlMPK3-OE vs. Slmapk3 SlIDL6	0	0	0	2.067	3	3	0	60
	SlMPK3-OE vs. SlMPK3-OE SlIDL6	0	0	0	2.067	3	3	0	60
	WT SlIDL6 vs. Slmapk3 SlIDL6	0	0	0	2.067	3	3	0	60
	WT SlIDL6 vs. SlMPK3-OE SlIDL6	0	0	0	2.067	3	3	0	60
	Slmapk3 SlIDL6 vs. SlMPK3-OE SlIDL6	0	0	0	2.067	3	3	0	60
	8
	WT vs. Slmapk3	32.91	21.62	11.29	2.067	3	3	7.728	60
	WT vs. SlMPK3-OE	32.91	48.6	-15.69	2.067	3	3	10.74	60
	WT vs. WT SlIDL6	32.91	50.95	-18.03	2.067	3	3	12.34	60
	WT vs. Slmapk3 SlIDL6	32.91	23.31	9.6	2.067	3	3	6.569	60
	WT vs. SlMPK3-OE SlIDL6	32.91	77.85	-44.94	2.067	3	3	30.75	60
	Slmapk3 vs. SlMPK3-OE	21.62	48.6	-26.99	2.067	3	3	18.47	60
	Slmapk3 vs. WT SlIDL6	21.62	50.95	-29.33	2.067	3	3	20.07	60
	Slmapk3 vs. Slmapk3 SlIDL6	21.62	23.31	-1.695	2.067	3	3	1.159	60
	Slmapk3 vs. SlMPK3-OE SlIDL6	21.62	77.85	-56.23	2.067	3	3	38.47	60
	SlMPK3-OE vs. WT SlIDL6	48.6	50.95	-2.342	2.067	3	3	1.603	60
	SlMPK3-OE vs. Slmapk3 SlIDL6	48.6	23.31	25.29	2.067	3	3	17.31	60
	SlMPK3-OE vs. SlMPK3-OE SlIDL6	48.6	77.85	-29.24	2.067	3	3	20.01	60
	WT SlIDL6 vs. Slmapk3 SlIDL6	50.95	23.31	27.64	2.067	3	3	18.91	60
	WT SlIDL6 vs. SlMPK3-OE SlIDL6	50.95	77.85	-26.9	2.067	3	3	18.41	60
	Slmapk3 SlIDL6 vs. SlMPK3-OE SlIDL6	23.31	77.85	-54.54	2.067	3	3	37.32	60
	16
	WT vs. Slmapk3	55.47	39.96	15.51	2.067	3	3	10.61	60
	WT vs. SlMPK3-OE	55.47	79.69	-24.22	2.067	3	3	16.57	60
	WT vs. WT SlIDL6	55.47	79.88	-24.41	2.067	3	3	16.7	60
	WT vs. Slmapk3 SlIDL6	55.47	41.83	13.64	2.067	3	3	9.332	60
	WT vs. SlMPK3-OE SlIDL6	55.47	96.96	-41.49	2.067	3	3	28.39	60
	Slmapk3 vs. SlMPK3-OE	39.96	79.69	-39.73	2.067	3	3	27.18	60
	Slmapk3 vs. WT SlIDL6	39.96	79.88	-39.92	2.067	3	3	27.32	60
	Slmapk3 vs. Slmapk3 SlIDL6	39.96	41.83	-1.873	2.067	3	3	1.282	60
	Slmapk3 vs. SlMPK3-OE SlIDL6	39.96	96.96	-57	2.067	3	3	39	60
	SlMPK3-OE vs. WT SlIDL6	79.69	79.88	-0.1936	2.067	3	3	0.1325	60
	SlMPK3-OE vs. Slmapk3 SlIDL6	79.69	41.83	37.86	2.067	3	3	25.9	60
	SlMPK3-OE vs. SlMPK3-OE SlIDL6	79.69	96.96	-17.27	2.067	3	3	11.82	60
	WT SlIDL6 vs. Slmapk3 SlIDL6	79.88	41.83	38.05	2.067	3	3	26.03	60
	WT SlIDL6 vs. SlMPK3-OE SlIDL6	79.88	96.96	-17.08	2.067	3	3	11.69	60
	Slmapk3 SlIDL6 vs. SlMPK3-OE SlIDL6	41.83	96.96	-55.13	2.067	3	3	37.72	60
	24
	WT vs. Slmapk3	86.49	50.31	36.18	2.067	3	3	24.75	60
	WT vs. SlMPK3-OE	86.49	100	-13.51	2.067	3	3	9.243	60
	WT vs. WT SlIDL6	86.49	100	-13.51	2.067	3	3	9.243	60
	WT vs. Slmapk3 SlIDL6	86.49	52.03	34.46	2.067	3	3	23.58	60
	WT vs. SlMPK3-OE SlIDL6	86.49	100	-13.51	2.067	3	3	9.243	60
	Slmapk3 vs. SlMPK3-OE	50.31	100	-49.69	2.067	3	3	34	60
	Slmapk3 vs. WT SlIDL6	50.31	100	-49.69	2.067	3	3	34	60
	Slmapk3 vs. Slmapk3 SlIDL6	50.31	52.03	-1.718	2.067	3	3	1.175	60
	Slmapk3 vs. SlMPK3-OE SlIDL6	50.31	100	-49.69	2.067	3	3	34	60
	SlMPK3-OE vs. WT SlIDL6	100	100	0	2.067	3	3	0	60
	SlMPK3-OE vs. Slmapk3 SlIDL6	100	52.03	47.97	2.067	3	3	32.82	60
	SlMPK3-OE vs. SlMPK3-OE SlIDL6	100	100	0	2.067	3	3	0	60
	WT SlIDL6 vs. Slmapk3 SlIDL6	100	52.03	47.97	2.067	3	3	32.82	60
	WT SlIDL6 vs. SlMPK3-OE SlIDL6	100	100	0	2.067	3	3	0	60
	Slmapk3 SlIDL6 vs. SlMPK3-OE SlIDL6	52.03	100	-47.97	2.067	3	3	32.82	60
	32
	WT vs. Slmapk3	100	61.87	38.13	2.067	3	3	26.09	60
	WT vs. SlMPK3-OE	100	100	0	2.067	3	3	0	60
	WT vs. WT SlIDL6	100	100	0	2.067	3	3	0	60
	WT vs. Slmapk3 SlIDL6	100	61.47	38.53	2.067	3	3	26.36	60
	WT vs. SlMPK3-OE SlIDL6	100	100	0	2.067	3	3	0	60
	Slmapk3 vs. SlMPK3-OE	61.87	100	-38.13	2.067	3	3	26.09	60
	Slmapk3 vs. WT SlIDL6	61.87	100	-38.13	2.067	3	3	26.09	60
	Slmapk3 vs. Slmapk3 SlIDL6	61.87	61.47	0.3985	2.067	3	3	0.2727	60
	Slmapk3 vs. SlMPK3-OE SlIDL6	61.87	100	-38.13	2.067	3	3	26.09	60
	SlMPK3-OE vs. WT SlIDL6	100	100	0	2.067	3	3	0	60
	SlMPK3-OE vs. Slmapk3 SlIDL6	100	61.47	38.53	2.067	3	3	26.36	60
	SlMPK3-OE vs. SlMPK3-OE SlIDL6	100	100	0	2.067	3	3	0	60
	WT SlIDL6 vs. Slmapk3 SlIDL6	100	61.47	38.53	2.067	3	3	26.36	60
	WT SlIDL6 vs. SlMPK3-OE SlIDL6	100	100	0	2.067	3	3	0	60
	Slmapk3 SlIDL6 vs. SlMPK3-OE SlIDL6	61.47	100	-38.53	2.067	3	3	26.36	60
		WT	Slmapk3	SlMPK3-OE	WT SlIDL6	Slmapk3 SlIDL6	SlMPK3-OE SlIDL6
	0	5.21557	3.22819	3.61754	3.95268	3.03979	0.523148
	0.032032	5.26578	3.26371	3.6873	4.02837	3.0777	0.557639
	0.0640641	5.31632	3.29948	3.758	4.10505	3.11593	0.593942
	0.0960961	5.36719	3.33551	3.82963	4.18273	3.15447	0.632123
	0.128128	5.41838	3.37181	3.90221	4.26142	3.19332	0.672249
	0.16016	5.4699	3.40836	3.97573	4.34111	3.2325	0.714387
	0.192192	5.52175	3.44517	4.05021	4.42181	3.27199	0.758605
	0.224224	5.57392	3.48224	4.12564	4.50353	3.31179	0.804972
	0.256256	5.62643	3.51958	4.20203	4.58626	3.35192	0.853556
	0.288288	5.67927	3.55718	4.27939	4.67002	3.39236	0.904427
	0.32032	5.73243	3.59504	4.35772	4.7548	3.43313	0.957655
	0.352352	5.78593	3.63316	4.43702	4.84061	3.47421	1.01331
	0.384384	5.83976	3.67154	4.51729	4.92746	3.51562	1.07146
	0.416416	5.89392	3.71019	4.59855	5.01534	3.55734	1.13219
	0.448448	5.94841	3.7491	4.68079	5.10425	3.59939	1.19555
	0.48048	6.00323	3.78828	4.76401	5.19422	3.64175	1.26162
	0.512513	6.05839	3.82772	4.84823	5.28522	3.68444	1.33047
	0.544545	6.11388	3.86742	4.93344	5.37728	3.72745	1.40217
	0.576577	6.16971	3.90739	5.01965	5.47038	3.77079	1.47679
	0.608609	6.22586	3.94762	5.10685	5.56454	3.81444	1.5544
	0.640641	6.28236	3.98812	5.19506	5.65975	3.85843	1.63508
	0.672673	6.33919	4.02888	5.28428	5.75602	3.90273	1.71888
	0.704705	6.39635	4.06991	5.3745	5.85335	3.94736	1.80587
	0.736737	6.45385	4.1112	5.46573	5.95174	3.99231	1.89613
	0.768769	6.51169	4.15277	5.55797	6.05119	4.03759	1.98972
	0.800801	6.56987	4.19459	5.65123	6.15171	4.08319	2.08671
	0.832833	6.62838	4.23669	5.74551	6.25329	4.12912	2.18715
	0.864865	6.68723	4.27904	5.8408	6.35595	4.17537	2.29113
	0.896897	6.74641	4.32167	5.93712	6.45967	4.22195	2.39868
	0.928929	6.80594	4.36456	6.03446	6.56446	4.26885	2.50989
	0.960961	6.8658	4.40772	6.13282	6.67033	4.31608	2.6248
	0.992993	6.926	4.45115	6.23221	6.77726	4.36363	2.74348
	1.02503	6.98654	4.49484	6.33263	6.88527	4.41151	2.86598
	1.05706	7.04742	4.5388	6.43408	6.99436	4.45972	2.99237
	1.08909	7.10864	4.58303	6.53655	7.10452	4.50825	3.12268
	1.12112	7.1702	4.62752	6.64006	7.21575	4.55711	3.25698
	1.15315	7.2321	4.67229	6.7446	7.32806	4.60629	3.39532
	1.18519	7.29434	4.71731	6.85017	7.44144	4.6558	3.53774
	1.21722	7.35692	4.76261	6.95678	7.5559	4.70564	3.68429
	1.24925	7.41984	4.80817	7.06442	7.67143	4.7558	3.83502
	1.28128	7.4831	4.854	7.17309	7.78804	4.80629	3.98997
	1.31331	7.5467	4.9001	7.2828	7.90572	4.8571	4.14918
	1.34535	7.61064	4.94647	7.39354	8.02448	4.90824	4.31269
	1.37738	7.67492	4.9931	7.50532	8.14431	4.95971	4.48053
	1.40941	7.73955	5.04	7.61813	8.26521	5.0115	4.65275
	1.44144	7.80451	5.08716	7.73198	8.38718	5.06361	4.82937
	1.47347	7.86982	5.13459	7.84687	8.51022	5.11605	5.01041
	1.50551	7.93547	5.18229	7.96278	8.63434	5.16882	5.19592
	1.53754	8.00146	5.23026	8.07973	8.75951	5.22191	5.38592
	1.56957	8.06779	5.27849	8.19772	8.88576	5.27532	5.58042
	1.6016	8.13447	5.32699	8.31673	9.01307	5.32906	5.77946
	1.63363	8.20149	5.37575	8.43678	9.14144	5.38312	5.98303
	1.66567	8.26884	5.42478	8.55786	9.27087	5.43751	6.19118
	1.6977	8.33654	5.47408	8.67996	9.40136	5.49222	6.40389
	1.72973	8.40459	5.52364	8.8031	9.53291	5.54725	6.6212
	1.76176	8.47297	5.57347	8.92726	9.66551	5.6026	6.8431
	1.79379	8.5417	5.62356	9.05244	9.79917	5.65828	7.0696
	1.82583	8.61077	5.67392	9.17865	9.93387	5.71428	7.3007
	1.85786	8.68018	5.72454	9.30588	10.0696	5.7706	7.53641
	1.88989	8.74993	5.77542	9.43413	10.2064	5.82724	7.77672
	1.92192	8.82002	5.82657	9.5634	10.3443	5.8842	8.02163
	1.95395	8.89046	5.87799	9.69368	10.4831	5.94148	8.27113
	1.98599	8.96124	5.92966	9.82498	10.623	5.99908	8.52521
	2.01802	9.03236	5.9816	9.95728	10.764	6.057	8.78387
	2.05005	9.10382	6.03381	10.0906	10.9059	6.11523	9.04708
	2.08208	9.17562	6.08627	10.2249	11.0489	6.17379	9.31483
	2.11411	9.24776	6.139	10.3602	11.1929	6.23266	9.5871
	2.14615	9.32025	6.19199	10.4966	11.338	6.29185	9.86387
	2.17818	9.39307	6.24524	10.6339	11.484	6.35136	10.1451
	2.21021	9.46624	6.29875	10.7722	11.6311	6.41118	10.4308
	2.24224	9.53974	6.35252	10.9115	11.7791	6.47131	10.7209
	2.27427	9.61359	6.40656	11.0518	11.9282	6.53176	11.0155
	2.30631	9.68778	6.46085	11.1931	12.0783	6.59252	11.3143
	2.33834	9.7623	6.5154	11.3353	12.2293	6.6536	11.6175
	2.37037	9.83717	6.57021	11.4786	12.3814	6.71499	11.925
	2.4024	9.91238	6.62528	11.6228	12.5344	6.77668	12.2367
	2.43443	9.98792	6.68061	11.768	12.6884	6.83869	12.5527
	2.46647	10.0638	6.73619	11.9141	12.8434	6.90101	12.8728
	2.4985	10.14	6.79203	12.0612	12.9993	6.96364	13.197
	2.53053	10.2166	6.84813	12.2093	13.1562	7.02658	13.5253
	2.56256	10.2935	6.90449	12.3583	13.3141	7.08982	13.8576
	2.59459	10.3707	6.9611	12.5083	13.4729	7.15337	14.1939
	2.62663	10.4483	7.01796	12.6592	13.6327	7.21723	14.5341
	2.65866	10.5262	7.07508	12.8111	13.7934	7.28139	14.8782
	2.69069	10.6045	7.13245	12.9639	13.955	7.34585	15.2261
	2.72272	10.6831	7.19008	13.1176	14.1176	7.41062	15.5777
	2.75475	10.762	7.24796	13.2722	14.2811	7.47569	15.933
	2.78679	10.8412	7.30609	13.4278	14.4455	7.54106	16.292
	2.81882	10.9208	7.36447	13.5843	14.6109	7.60673	16.6546
	2.85085	11.0008	7.4231	13.7417	14.7771	7.6727	17.0206
	2.88288	11.081	7.48199	13.9	14.9443	7.73897	17.3901
	2.91491	11.1616	7.54112	14.0592	15.1123	7.80553	17.763
	2.94695	11.2426	7.6005	14.2193	15.2813	7.8724	18.1391
	2.97898	11.3238	7.66013	14.3803	15.4511	7.93955	18.5186
	3.01101	11.4054	7.72001	14.5422	15.6218	8.007	18.9012
	3.04304	11.4874	7.78013	14.705	15.7933	8.07475	19.2869
	3.07508	11.5696	7.8405	14.8686	15.9658	8.14279	19.6756
	3.10711	11.6522	7.90112	15.0331	16.139	8.21111	20.0673
	3.13914	11.7351	7.96198	15.1985	16.3132	8.27973	20.4619
	3.17117	11.8184	8.02309	15.3647	16.4882	8.34864	20.8593
	3.2032	11.902	8.08443	15.5317	16.664	8.41783	21.2595
	3.23524	11.9859	8.14603	15.6997	16.8406	8.48731	21.6623
	3.26727	12.0701	8.20786	15.8684	17.0181	8.55707	22.0677
	3.2993	12.1547	8.26993	16.038	17.1963	8.62712	22.4756
	3.33133	12.2396	8.33225	16.2084	17.3754	8.69745	22.886
	3.36336	12.3248	8.3948	16.3796	17.5553	8.76807	23.2987
	3.3954	12.4104	8.45759	16.5517	17.736	8.83896	23.7137
	3.42743	12.4963	8.52062	16.7245	17.9174	8.91013	24.131
	3.45946	12.5825	8.58389	16.8982	18.0997	8.98158	24.5503
	3.49149	12.669	8.64739	17.0726	18.2827	9.05331	24.9717
	3.52352	12.7559	8.71113	17.2478	18.4665	9.12531	25.3951
	3.55556	12.8431	8.7751	17.4238	18.651	9.19759	25.8204
	3.58759	12.9306	8.83931	17.6006	18.8363	9.27014	26.2474
	3.61962	13.0184	8.90375	17.7781	19.0223	9.34296	26.6763
	3.65165	13.1065	8.96842	17.9564	19.209	9.41605	27.1068
	3.68368	13.195	9.03332	18.1355	19.3965	9.48941	27.5388
	3.71572	13.2838	9.09845	18.3153	19.5847	9.56304	27.9724
	3.74775	13.3729	9.16382	18.4958	19.7736	9.63693	28.4074
	3.77978	13.4623	9.22941	18.677	19.9632	9.71109	28.8438
	3.81181	13.5521	9.29522	18.859	20.1535	9.78551	29.2814
	3.84384	13.6421	9.36127	19.0417	20.3444	9.86019	29.7202
	3.87588	13.7325	9.42754	19.2251	20.5361	9.93513	30.1601
	3.90791	13.8232	9.49403	19.4092	20.7284	10.0103	30.6011
	3.93994	13.9142	9.56075	19.594	20.9214	10.0858	31.0431
	3.97197	14.0055	9.62769	19.7795	21.115	10.1615	31.4859
	4.004	14.0972	9.69485	19.9657	21.3093	10.2375	31.9295
	4.03604	14.1891	9.76224	20.1525	21.5042	10.3137	32.3739
	4.06807	14.2814	9.82984	20.34	21.6997	10.3902	32.8189
	4.1001	14.374	9.89766	20.5282	21.8958	10.4669	33.2646
	4.13213	14.4668	9.9657	20.717	22.0926	10.5439	33.7107
	4.16416	14.56	10.034	20.9064	22.29	10.6211	34.1573
	4.1962	14.6535	10.1024	21.0965	22.4879	10.6986	34.6043
	4.22823	14.7473	10.1711	21.2872	22.6864	10.7763	35.0516
	4.26026	14.8415	10.24	21.4785	22.8855	10.8542	35.4991
	4.29229	14.9359	10.3091	21.6704	23.0852	10.9324	35.9468
	4.32432	15.0306	10.3785	21.8629	23.2854	11.0108	36.3946
	4.35636	15.1257	10.448	22.056	23.4862	11.0895	36.8424
	4.38839	15.221	10.5177	22.2497	23.6875	11.1684	37.2901
	4.42042	15.3166	10.5877	22.444	23.8894	11.2476	37.7378
	4.45245	15.4126	10.6578	22.6389	24.0918	11.3269	38.1853
	4.48448	15.5088	10.7282	22.8343	24.2947	11.4065	38.6325
	4.51652	15.6054	10.7988	23.0302	24.498	11.4864	39.0795
	4.54855	15.7022	10.8696	23.2267	24.7019	11.5664	39.5261
	4.58058	15.7993	10.9405	23.4238	24.9063	11.6467	39.9722
	4.61261	15.8968	11.0117	23.6213	25.1112	11.7273	40.4179
	4.64464	15.9945	11.0831	23.8194	25.3165	11.808	40.863
	4.67668	16.0926	11.1547	24.018	25.5223	11.889	41.3076
	4.70871	16.1909	11.2265	24.2171	25.7285	11.9701	41.7514
	4.74074	16.2895	11.2984	24.4167	25.9352	12.0515	42.1946
	4.77277	16.3884	11.3706	24.6168	26.1424	12.1331	42.637
	4.8048	16.4876	11.443	24.8174	26.3499	12.215	43.0785
	4.83684	16.5871	11.5155	25.0184	26.5579	12.297	43.5192
	4.86887	16.6869	11.5883	25.2199	26.7663	12.3793	43.9589
	4.9009	16.787	11.6612	25.4219	26.9751	12.4617	44.3977
	4.93293	16.8873	11.7344	25.6243	27.1842	12.5444	44.8354
	4.96496	16.988	11.8077	25.8271	27.3938	12.6273	45.272
	4.997	17.0889	11.8812	26.0304	27.6037	12.7104	45.7075
	5.02903	17.1901	11.9549	26.2341	27.814	12.7937	46.1418
	5.06106	17.2916	12.0288	26.4382	28.0247	12.8771	46.5748
	5.09309	17.3934	12.1029	26.6427	28.2357	12.9608	47.0066
	5.12513	17.4954	12.1771	26.8476	28.447	13.0447	47.4371
	5.15716	17.5978	12.2516	27.0529	28.6587	13.1288	47.8662
	5.18919	17.7004	12.3262	27.2586	28.8707	13.2131	48.2938
	5.22122	17.8033	12.401	27.4646	29.083	13.2975	48.7201
	5.25325	17.9065	12.4759	27.671	29.2956	13.3822	49.1448
	5.28529	18.0099	12.5511	27.8778	29.5085	13.467	49.568
	5.31732	18.1136	12.6264	28.0849	29.7217	13.5521	49.9896
	5.34935	18.2176	12.7019	28.2924	29.9352	13.6373	50.4097
	5.38138	18.3219	12.7776	28.5001	30.1489	13.7227	50.828
	5.41341	18.4264	12.8535	28.7082	30.3629	13.8083	51.2447
	5.44545	18.5312	12.9295	28.9167	30.5772	13.894	51.6597
	5.47748	18.6363	13.0057	29.1254	30.7917	13.98	52.0729
	5.50951	18.7417	13.082	29.3344	31.0064	14.0661	52.4844
	5.54154	18.8473	13.1585	29.5437	31.2214	14.1524	52.894
	5.57357	18.9531	13.2352	29.7533	31.4366	14.2388	53.3018
	5.60561	19.0593	13.3121	29.9632	31.652	14.3254	53.7077
	5.63764	19.1657	13.3891	30.1733	31.8676	14.4122	54.1117
	5.66967	19.2723	13.4663	30.3837	32.0833	14.4992	54.5138
	5.7017	19.3793	13.5436	30.5944	32.2993	14.5863	54.9139
	5.73373	19.4865	13.6211	30.8052	32.5155	14.6736	55.312
	5.76577	19.5939	13.6988	31.0163	32.7318	14.7611	55.7081
	5.7978	19.7016	13.7766	31.2277	32.9483	14.8487	56.1022
	5.82983	19.8096	13.8545	31.4392	33.1649	14.9365	56.4943
	5.86186	19.9178	13.9327	31.651	33.3817	15.0244	56.8842
	5.89389	20.0262	14.0109	31.863	33.5986	15.1125	57.2721
	5.92593	20.1349	14.0894	32.0751	33.8156	15.2007	57.6578
	5.95796	20.2439	14.1679	32.2875	34.0328	15.2891	58.0414
	5.98999	20.3531	14.2467	32.5	34.2501	15.3777	58.4228
	6.02202	20.4626	14.3256	32.7127	34.4674	15.4664	58.802
	6.05405	20.5723	14.4046	32.9255	34.6849	15.5552	59.179
	6.08609	20.6822	14.4837	33.1385	34.9024	15.6442	59.5539
	6.11812	20.7924	14.563	33.3517	35.1201	15.7333	59.9265
	6.15015	20.9029	14.6425	33.565	35.3378	15.8225	60.2968
	6.18218	21.0136	14.7221	33.7784	35.5555	15.9119	60.6649
	6.21421	21.1245	14.8018	33.9919	35.7734	16.0014	61.0307
	6.24625	21.2357	14.8817	34.2056	35.9912	16.0911	61.3943
	6.27828	21.3471	14.9617	34.4194	36.2091	16.1809	61.7555
	6.31031	21.4587	15.0418	34.6332	36.4271	16.2708	62.1144
	6.34234	21.5706	15.1221	34.8472	36.645	16.3608	62.471
	6.37437	21.6827	15.2025	35.0612	36.863	16.451	62.8253
	6.40641	21.795	15.2831	35.2754	37.081	16.5413	63.1773
	6.43844	21.9076	15.3637	35.4895	37.299	16.6317	63.5269
	6.47047	22.0204	15.4446	35.7038	37.517	16.7223	63.8741
	6.5025	22.1334	15.5255	35.9181	37.735	16.8129	64.219
	6.53453	22.2467	15.6065	36.1325	37.9529	16.9037	64.5615
	6.56657	22.3602	15.6877	36.3469	38.1708	16.9946	64.9016
	6.5986	22.4739	15.769	36.5613	38.3887	17.0856	65.2394
	6.63063	22.5878	15.8504	36.7757	38.6066	17.1767	65.5748
	6.66266	22.702	15.932	36.9902	38.8244	17.268	65.9077
	6.69469	22.8163	16.0137	37.2047	39.0421	17.3593	66.2383
	6.72673	22.9309	16.0954	37.4192	39.2598	17.4507	66.5665
	6.75876	23.0457	16.1773	37.6337	39.4774	17.5423	66.8923
	6.79079	23.1608	16.2594	37.8481	39.6949	17.6339	67.2157
	6.82282	23.276	16.3415	38.0626	39.9123	17.7257	67.5367
	6.85485	23.3915	16.4237	38.277	40.1297	17.8175	67.8554
	6.88689	23.5071	16.5061	38.4914	40.3469	17.9095	68.1716
	6.91892	23.623	16.5886	38.7058	40.5641	18.0015	68.4854
	6.95095	23.7391	16.6711	38.9201	40.7811	18.0936	68.7968
	6.98298	23.8554	16.7538	39.1344	40.998	18.1858	69.1058
	7.01502	23.9719	16.8366	39.3486	41.2148	18.2781	69.4124
	7.04705	24.0886	16.9195	39.5627	41.4314	18.3705	69.7166
	7.07908	24.2055	17.0025	39.7768	41.6479	18.463	70.0184
	7.11111	24.3226	17.0856	39.9908	41.8643	18.5556	70.3178
	7.14314	24.44	17.1688	40.2047	42.0805	18.6482	70.6149
	7.17518	24.5575	17.2521	40.4185	42.2966	18.741	70.9095
	7.20721	24.6752	17.3355	40.6323	42.5124	18.8338	71.2018
	7.23924	24.7931	17.419	40.8459	42.7282	18.9266	71.4917
	7.27127	24.9112	17.5026	41.0594	42.9437	19.0196	71.7793
	7.3033	25.0295	17.5862	41.2728	43.159	19.1126	72.0645
	7.33534	25.148	17.67	41.4861	43.3742	19.2057	72.3473
	7.36737	25.2667	17.7539	41.6992	43.5892	19.2989	72.6277
	7.3994	25.3856	17.8378	41.9122	43.8039	19.3921	72.9059
	7.43143	25.5046	17.9219	42.1251	44.0185	19.4854	73.1817
	7.46346	25.6239	18.006	42.3378	44.2328	19.5788	73.4551
	7.4955	25.7433	18.0902	42.5504	44.4469	19.6722	73.7262
	7.52753	25.863	18.1745	42.7628	44.6608	19.7657	73.9951
	7.55956	25.9828	18.2589	42.975	44.8745	19.8593	74.2616
	7.59159	26.1027	18.3434	43.1871	45.0879	19.9529	74.5258
	7.62362	26.2229	18.4279	43.3989	45.3011	20.0465	74.7877
	7.65566	26.3433	18.5125	43.6107	45.514	20.1402	75.0473
	7.68769	26.4638	18.5972	43.8222	45.7267	20.234	75.3047
	7.71972	26.5845	18.682	44.0335	45.9391	20.3278	75.5598
	7.75175	26.7053	18.7668	44.2446	46.1513	20.4217	75.8126
	7.78378	26.8264	18.8518	44.4555	46.3632	20.5156	76.0632
	7.81582	26.9476	18.9368	44.6662	46.5748	20.6095	76.3115
	7.84785	27.069	19.0218	44.8767	46.7861	20.7035	76.5577
	7.87988	27.1905	19.107	45.087	46.9971	20.7976	76.8016
	7.91191	27.3122	19.1922	45.297	47.2079	20.8916	77.0433
	7.94394	27.4341	19.2774	45.5068	47.4183	20.9857	77.2828
	7.97598	27.5562	19.3628	45.7164	47.6285	21.0799	77.5201
	8.00801	27.6784	19.4482	45.9257	47.8383	21.1741	77.7553
	8.04004	27.8008	19.5336	46.1348	48.0478	21.2683	77.9883
	8.07207	27.9233	19.6192	46.3436	48.257	21.3625	78.2191
	8.1041	28.046	19.7048	46.5522	48.4659	21.4568	78.4478
	8.13614	28.1688	19.7904	46.7604	48.6745	21.5511	78.6744
	8.16817	28.2918	19.8761	46.9685	48.8827	21.6454	78.8989
	8.2002	28.415	19.9619	47.1762	49.0906	21.7398	79.1213
	8.23223	28.5383	20.0477	47.3837	49.2981	21.8341	79.3415
	8.26426	28.6617	20.1335	47.5909	49.5054	21.9285	79.5597
	8.2963	28.7853	20.2195	47.7978	49.7122	22.0229	79.7759
	8.32833	28.9091	20.3054	48.0044	49.9187	22.1174	79.99
	8.36036	29.033	20.3914	48.2107	50.1249	22.2118	80.202
	8.39239	29.157	20.4775	48.4167	50.3306	22.3062	80.412
	8.42442	29.2812	20.5636	48.6224	50.5361	22.4007	80.62
	8.45646	29.4056	20.6498	48.8278	50.7411	22.4952	80.826
	8.48849	29.53	20.736	49.0328	50.9458	22.5897	81.03
	8.52052	29.6546	20.8222	49.2376	51.15	22.6842	81.232
	8.55255	29.7794	20.9085	49.442	51.3539	22.7787	81.4321
	8.58458	29.9043	20.9949	49.6461	51.5575	22.8732	81.6302
	8.61662	30.0293	21.0812	49.8499	51.7606	22.9677	81.8264
	8.64865	30.1544	21.1676	50.0533	51.9633	23.0622	82.0206
	8.68068	30.2797	21.2541	50.2564	52.1656	23.1567	82.213
	8.71271	30.4051	21.3406	50.4591	52.3676	23.2512	82.4034
	8.74474	30.5306	21.4271	50.6615	52.5691	23.3457	82.592
	8.77678	30.6563	21.5136	50.8635	52.7702	23.4402	82.7787
	8.80881	30.7821	21.6002	51.0652	52.9709	23.5347	82.9635
	8.84084	30.908	21.6868	51.2665	53.1711	23.6291	83.1465
	8.87287	31.0341	21.7735	51.4674	53.371	23.7236	83.3276
	8.9049	31.1602	21.8601	51.668	53.5704	23.8181	83.507
	8.93694	31.2865	21.9468	51.8682	53.7694	23.9125	83.6845
	8.96897	31.4129	22.0335	52.068	53.968	24.0069	83.8603
	9.001	31.5394	22.1203	52.2674	54.1661	24.1013	84.0342
	9.03303	31.666	22.2071	52.4665	54.3638	24.1957	84.2064
	9.06507	31.7928	22.2938	52.6651	54.561	24.2901	84.3769
	9.0971	31.9196	22.3806	52.8634	54.7578	24.3845	84.5456
	9.12913	32.0466	22.4675	53.0613	54.9542	24.4788	84.7126
	9.16116	32.1737	22.5543	53.2587	55.1501	24.5731	84.8779
	9.19319	32.3009	22.6412	53.4558	55.3455	24.6674	85.0415
	9.22523	32.4281	22.7281	53.6525	55.5405	24.7616	85.2034
	9.25726	32.5555	22.815	53.8487	55.735	24.8558	85.3637
	9.28929	32.683	22.9019	54.0446	55.9291	24.95	85.5223
	9.32132	32.8106	22.9888	54.24	56.1227	25.0442	85.6792
	9.35335	32.9383	23.0757	54.435	56.3158	25.1383	85.8346
	9.38539	33.0661	23.1626	54.6296	56.5085	25.2324	85.9883
	9.41742	33.194	23.2496	54.8238	56.7007	25.3265	86.1404
	9.44945	33.322	23.3365	55.0175	56.8924	25.4205	86.2909
	9.48148	33.4501	23.4235	55.2108	57.0836	25.5145	86.4399
	9.51351	33.5783	23.5105	55.4037	57.2743	25.6084	86.5873
	9.54555	33.7066	23.5974	55.5961	57.4646	25.7024	86.7331
	9.57758	33.8349	23.6844	55.7881	57.6543	25.7962	86.8775
	9.60961	33.9634	23.7714	55.9796	57.8436	25.89	87.0203
	9.64164	34.0919	23.8583	56.1707	58.0324	25.9838	87.1615
	9.67367	34.2205	23.9453	56.3614	58.2207	26.0775	87.3013
	9.70571	34.3493	24.0323	56.5516	58.4085	26.1712	87.4397
	9.73774	34.478	24.1192	56.7413	58.5958	26.2648	87.5765
	9.76977	34.6069	24.2062	56.9306	58.7826	26.3584	87.7119
	9.8018	34.7359	24.2932	57.1195	58.9689	26.4519	87.8458
	9.83383	34.8649	24.3801	57.3078	59.1547	26.5454	87.9784
	9.86587	34.994	24.467	57.4958	59.34	26.6388	88.1095
	9.8979	35.1232	24.554	57.6832	59.5247	26.7322	88.2392
	9.92993	35.2525	24.6409	57.8702	59.709	26.8255	88.3675
	9.96196	35.3818	24.7278	58.0567	59.8927	26.9187	88.4944
	9.99399	35.5112	24.8147	58.2427	60.076	27.0119	88.62
	10.026	35.6407	24.9016	58.4283	60.2587	27.105	88.7442
	10.0581	35.7702	24.9885	58.6134	60.4409	27.1981	88.8671
	10.0901	35.8999	25.0753	58.798	60.6225	27.2911	88.9886
	10.1221	36.0295	25.1621	58.9821	60.8037	27.384	89.1089
	10.1542	36.1593	25.249	59.1657	60.9843	27.4769	89.2278
	10.1862	36.2891	25.3358	59.3489	61.1644	27.5697	89.3454
	10.2182	36.4189	25.4225	59.5316	61.344	27.6624	89.4618
	10.2503	36.5489	25.5093	59.7137	61.523	27.7551	89.5769
	10.2823	36.6789	25.596	59.8954	61.7015	27.8477	89.6907
	10.3143	36.8089	25.6827	60.0766	61.8795	27.9402	89.8033
	10.3463	36.939	25.7694	60.2573	62.057	28.0326	89.9147
	10.3784	37.0692	25.8561	60.4375	62.2339	28.125	90.0248
	10.4104	37.1994	25.9427	60.6172	62.4103	28.2173	90.1337
	10.4424	37.3296	26.0293	60.7964	62.5861	28.3095	90.2415
	10.4745	37.4599	26.1159	60.9752	62.7614	28.4016	90.348
	10.5065	37.5903	26.2025	61.1534	62.9362	28.4937	90.4534
	10.5385	37.7207	26.289	61.3311	63.1104	28.5857	90.5576
	10.5706	37.8512	26.3755	61.5082	63.2841	28.6775	90.6607
	10.6026	37.9817	26.4619	61.6849	63.4572	28.7694	90.7626
	10.6346	38.1122	26.5483	61.8611	63.6298	28.8611	90.8634
	10.6667	38.2428	26.6347	62.0368	63.8019	28.9527	90.9631
	10.6987	38.3734	26.7211	62.2119	63.9734	29.0443	91.0617
	10.7307	38.5041	26.8074	62.3866	64.1443	29.1357	91.1592
	10.7628	38.6348	26.8937	62.5607	64.3148	29.2271	91.2556
	10.7948	38.7655	26.9799	62.7343	64.4846	29.3184	91.3509
	10.8268	38.8963	27.0661	62.9074	64.6539	29.4096	91.4452
	10.8589	39.0271	27.1523	63.08	64.8227	29.5007	91.5384
	10.8909	39.158	27.2384	63.252	64.9909	29.5917	91.6306
	10.9229	39.2888	27.3244	63.4236	65.1585	29.6826	91.7217
	10.955	39.4197	27.4105	63.5946	65.3256	29.7735	91.8118
	10.987	39.5507	27.4965	63.7651	65.4922	29.8642	91.9009
	11.019	39.6816	27.5824	63.935	65.6582	29.9548	91.9891
	11.0511	39.8126	27.6683	64.1045	65.8236	30.0454	92.0762
	11.0831	39.9436	27.7541	64.2734	65.9885	30.1358	92.1623
	11.1151	40.0747	27.8399	64.4418	66.1528	30.2261	92.2475
	11.1471	40.2057	27.9257	64.6096	66.3166	30.3163	92.3317
	11.1792	40.3368	28.0114	64.777	66.4798	30.4065	92.415
	11.2112	40.4679	28.097	64.9438	66.6425	30.4965	92.4973
	11.2432	40.599	28.1826	65.1101	66.8046	30.5864	92.5787
	11.2753	40.7301	28.2681	65.2758	66.9661	30.6762	92.6592
	11.3073	40.8613	28.3536	65.441	67.1271	30.766	92.7388
	11.3393	40.9924	28.439	65.6057	67.2876	30.8556	92.8174
	11.3714	41.1236	28.5244	65.7699	67.4474	30.9451	92.8952
	11.4034	41.2548	28.6097	65.9335	67.6067	31.0344	92.9721
	11.4354	41.386	28.695	66.0966	67.7655	31.1237	93.0481
	11.4675	41.5172	28.7802	66.2591	67.9237	31.2129	93.1233
	11.4995	41.6484	28.8653	66.4211	68.0813	31.3019	93.1976
	11.5315	41.7796	28.9504	66.5826	68.2384	31.3909	93.2711
	11.5636	41.9108	29.0354	66.7435	68.3949	31.4797	93.3437
	11.5956	42.0421	29.1204	66.9039	68.5508	31.5684	93.4155
	11.6276	42.1733	29.2053	67.0638	68.7062	31.657	93.4864
	11.6597	42.3045	29.2901	67.2231	68.861	31.7455	93.5566
	11.6917	42.4357	29.3749	67.3819	69.0153	31.8339	93.626
	11.7237	42.567	29.4596	67.5402	69.169	31.9221	93.6945
	11.7558	42.6982	29.5442	67.6979	69.3221	32.0103	93.7623
[truncated: 632 more rows]

## Sheet: Fig. 7
Fig. 7A
Fig. 7B
Fig. 7C
Fig. 7D
Fig. 7E
Fig. 7F
Fig. 7H	date
	proSlCYP76B23:LUC + 35S:SlMAPK3 + 35S:SlWRKY73	proSlCYP76B23:LUC + 35S:SlWRKY73	proSlCYP76B23:LUC + Empty vector	proSlCYP76B23:LUC + 35S:SlMAPK3 + 35S:SlWRKY73S178A
	3.46473	2.27823	0.9202	1
	3.2899	2.16103	1.23103	0.927146
	3.32303	2.29168	1.26719	1.17848
	Table Analyzed
	Data sets analyzed	A-D
	ANOVA summary
	F	213.2
	P value	<0.0001
	P value summary	****
	Significant diff. among means (P < 0.05)?	Yes
	R squared	0.9876
	Brown-Forsythe test
	F (DFn, DFd)	0.2576 (3, 8)
	P value	0.8539
	P value summary	ns
	Are SDs significantly different (P < 0.05)?	No
	Bartlett's test
	Bartlett's statistic (corrected)
	P value
	P value summary
	Are SDs significantly different (P < 0.05)?
	ANOVA table	SS	DF	MS	F (DFn, DFd)	P value
	Treatment (between columns)	10.7	3	3.566	F (3, 8) = 213.2	P<0.0001
	Residual (within columns)	0.1338	8	0.01672
	Total	10.83	11
	Data summary
	Number of treatments (columns)	4
	Number of values (total)	12
	Number of families	1
	Number of comparisons per family	6
	Alpha	0.05
	Tukey's multiple comparisons test	Mean Diff.	95.00% CI of diff.	Significant?	Summary	Adjusted P Value
	Column A vs. Column B	1.116	0.7774 to 1.454	Yes	****	<0.0001	A-B
	Column A vs. Column C	2.22	1.882 to 2.558	Yes	****	<0.0001	A-C
	Column A vs. Column D	2.324	1.986 to 2.662	Yes	****	<0.0001	A-D
	Column B vs. Column C	1.104	0.7660 to 1.442	Yes	****	<0.0001	B-C
	Column B vs. Column D	1.208	0.8703 to 1.547	Yes	****	<0.0001	B-D
	Column C vs. Column D	0.1043	-0.2339 to 0.4424	No	ns	0.7605	C-D
	Test details	Mean 1	Mean 2	Mean Diff.	SE of diff.	n1	n2	q	DF
	Column A vs. Column B	3.359	2.244	1.116	0.1056	3	3	14.94	8
	Column A vs. Column C	3.359	1.139	2.22	0.1056	3	3	29.73	8
	Column A vs. Column D	3.359	1.035	2.324	0.1056	3	3	31.13	8
	Column B vs. Column C	2.244	1.139	1.104	0.1056	3	3	14.79	8
	Column B vs. Column D	2.244	1.035	1.208	0.1056	3	3	16.18	8
	Column C vs. Column D	1.139	1.035	0.1043	0.1056	3	3	1.396	8
Fig. 7I	date
		CK			IDL6
	WT	1	0.899687	1.09937	2.96161	3.3785	3.64617
	Slwrky73 SlWRKY73	1.1466	0.908046	1.38755	4.02668	3.44949	3.19626
	Slwrky73 SlWRKY73S178D	5.14792	3.97698	5.86476	9.42903	8.38146	8.07994
	Slwrky73 SlWRKY73S178A	0.209942	0.181453	0.165669	0.210583	0.159128	0.116628
	Table Analyzed
	Two-way ANOVA	Ordinary
	Alpha	0.05
	Source of Variation	% of total variation	P value	P value summary	Significant?
	Interaction	5.786	<0.0001	****	Yes
	Row Factor	77.87	<0.0001	****	Yes
	Column Factor	14.38	<0.0001	****	Yes
	ANOVA table	SS	DF	MS	F (DFn, DFd)	P value
	Interaction	10.51	3	3.505	F (3, 16) = 15.75	P<0.0001
	Row Factor	141.5	3	47.17	F (3, 16) = 212.0	P<0.0001
	Column Factor	26.14	1	26.14	F (1, 16) = 117.5	P<0.0001
	Residual	3.56	16	0.2225
	Difference between column means
	Mean of CK	1.832
	Mean of IDL6	3.92
	Difference between means	-2.087
	SE of difference	0.1926
	95% CI of difference	-2.496 to -1.679
	Data summary
	Number of columns (Column Factor)	2
	Number of rows (Row Factor)	4
	Number of values	24
	Compare each cell mean with the other cell mean in that row
	Number of families	1
	Number of comparisons per family	4
	Alpha	0.05
	Sidak's multiple comparisons test	Mean Diff.	95.00% CI of diff.	Significant?	Summary	Adjusted P Value
	CK - IDL6
	WT	-2.329	-3.409 to -1.249	Yes	****	<0.0001
	Slwrky73 SlWRKY73	-2.41	-3.490 to -1.330	Yes	****	<0.0001
	Slwrky73 SlWRKY73S178D	-3.634	-4.713 to -2.554	Yes	****	<0.0001
	Slwrky73 SlWRKY73S178A	0.02358	-1.056 to 1.103	No	ns	>0.9999
	Test details	Mean 1	Mean 2	Mean Diff.	SE of diff.	N1	N2	t	DF
	CK - IDL6
	WT	0.9997	3.329	-2.329	0.3851	3	3	6.048	16
	Slwrky73 SlWRKY73	1.147	3.557	-2.41	0.3851	3	3	6.258	16
	Slwrky73 SlWRKY73S178D	4.997	8.63	-3.634	0.3851	3	3	9.435	16
	Slwrky73 SlWRKY73S178A	0.1857	0.1621	0.02358	0.3851	3	3	0.06121	16

## Sheet: Fig. 8
Fig. 8A	date
		WT			SlMAPK3-OE			Slwrky73			SlMAPK3-OE Slwrky73
	8 h	32.3529	34.2857	37.8378	48.4848	51.4286	64.5161	21.875	22.2222	20	34.375	38.8889	37.1429
	16 h	50	54.2857	54.0541	75.7576	88.5714	80.6452	37.5	36.1111	34.2857	56.25	61.1111	54.2857
	24 h	88.2353	88.5714	94.5946	100	100	100	43.75	50	48.5714	96.875	97.2222	94.2857
	Table Analyzed
	Two-way ANOVA	Ordinary
	Alpha	0.05
	Source of Variation	% of total variation	P value	P value summary	Significant?
	Interaction	5.567	<0.0001	****	Yes
	Row Factor	55.27	<0.0001	****	Yes
	Column Factor	37.68	<0.0001	****	Yes
	ANOVA table	SS	DF	MS	F (DFn, DFd)	P value
	Interaction	1319	6	219.8	F (6, 24) = 15.00	P<0.0001
	Row Factor	13094	2	6547	F (2, 24) = 446.8	P<0.0001
	Column Factor	8927	3	2976	F (3, 24) = 203.1	P<0.0001
	Residual	351.7	24	14.65
	Data summary
	Number of columns (Column Factor)	4
	Number of rows (Row Factor)	3
	Number of values	36
	Within each row, compare columns (simple effects within rows)
	Number of families	3
	Number of comparisons per family	6
	Alpha	0.05
	Tukey's multiple comparisons test	Mean Diff.	95.00% CI of diff.	Significant?	Summary	Adjusted P Value
	8
	WT vs. SlMAPK3-OE	-19.98	-28.61 to -11.36	Yes	****	<0.0001
	WT vs. Slwrky73	13.46	4.837 to 22.08	Yes	**	0.0013
	WT vs. SlMAPK3-OE Slwrky73	-1.977	-10.60 to 6.646	No	ns	0.9205
	SlMAPK3-OE vs. Slwrky73	33.44	24.82 to 42.07	Yes	****	<0.0001
	SlMAPK3-OE vs. SlMAPK3-OE Slwrky73	18.01	9.385 to 26.63	Yes	****	<0.0001
	Slwrky73 vs. SlMAPK3-OE Slwrky73	-15.44	-24.06 to -6.814	Yes	***	0.0003
	16
	WT vs. SlMAPK3-OE	-28.88	-37.50 to -20.26	Yes	****	<0.0001
	WT vs. Slwrky73	16.81	8.192 to 25.44	Yes	****	<0.0001
	WT vs. SlMAPK3-OE Slwrky73	-4.436	-13.06 to 4.187	No	ns	0.5001
	SlMAPK3-OE vs. Slwrky73	45.69	37.07 to 54.31	Yes	****	<0.0001
	SlMAPK3-OE vs. SlMAPK3-OE Slwrky73	24.44	15.82 to 33.06	Yes	****	<0.0001
	Slwrky73 vs. SlMAPK3-OE Slwrky73	-21.25	-29.87 to -12.63	Yes	****	<0.0001
	24
	WT vs. SlMAPK3-OE	-9.533	-18.16 to -0.9105	Yes	*	0.0264
	WT vs. Slwrky73	43.03	34.40 to 51.65	Yes	****	<0.0001
	WT vs. SlMAPK3-OE Slwrky73	-5.661	-14.28 to 2.962	No	ns	0.2929
	SlMAPK3-OE vs. Slwrky73	52.56	43.94 to 61.18	Yes	****	<0.0001
	SlMAPK3-OE vs. SlMAPK3-OE Slwrky73	3.872	-4.750 to 12.49	No	ns	0.6091
	Slwrky73 vs. SlMAPK3-OE Slwrky73	-48.69	-57.31 to -40.06	Yes	****	<0.0001
	Test details	Mean 1	Mean 2	Mean Diff.	SE of diff.	N1	N2	q	DF
	8
	WT vs. SlMAPK3-OE	34.83	54.81	-19.98	3.126	3	3	9.042	24
	WT vs. Slwrky73	34.83	21.37	13.46	3.126	3	3	6.09	24
	WT vs. SlMAPK3-OE Slwrky73	34.83	36.8	-1.977	3.126	3	3	0.8944	24
	SlMAPK3-OE vs. Slwrky73	54.81	21.37	33.44	3.126	3	3	15.13	24
	SlMAPK3-OE vs. SlMAPK3-OE Slwrky73	54.81	36.8	18.01	3.126	3	3	8.148	24
	Slwrky73 vs. SlMAPK3-OE Slwrky73	21.37	36.8	-15.44	3.126	3	3	6.984	24
	16
	WT vs. SlMAPK3-OE	52.78	81.66	-28.88	3.126	3	3	13.07	24
	WT vs. Slwrky73	52.78	35.97	16.81	3.126	3	3	7.608	24
	WT vs. SlMAPK3-OE Slwrky73	52.78	57.22	-4.436	3.126	3	3	2.007	24
	SlMAPK3-OE vs. Slwrky73	81.66	35.97	45.69	3.126	3	3	20.67	24
	SlMAPK3-OE vs. SlMAPK3-OE Slwrky73	81.66	57.22	24.44	3.126	3	3	11.06	24
	Slwrky73 vs. SlMAPK3-OE Slwrky73	35.97	57.22	-21.25	3.126	3	3	9.615	24
	24
	WT vs. SlMAPK3-OE	90.47	100	-9.533	3.126	3	3	4.313	24
	WT vs. Slwrky73	90.47	47.44	43.03	3.126	3	3	19.47	24
	WT vs. SlMAPK3-OE Slwrky73	90.47	96.13	-5.661	3.126	3	3	2.561	24
	SlMAPK3-OE vs. Slwrky73	100	47.44	52.56	3.126	3	3	23.78	24
	SlMAPK3-OE vs. SlMAPK3-OE Slwrky73	100	96.13	3.872	3.126	3	3	1.752	24
	Slwrky73 vs. SlMAPK3-OE Slwrky73	47.44	96.13	-48.69	3.126	3	3	22.03	24
Fig. 8B	date
		WT			Slwrky73			Slwrky73 SlWRKY73			Slwrky73 SlWRKY73S178A			Slwrky73 SlWRKY73S178D
	8 h	32.3529	37.1429	36.8421	21.875	22.2222	27.027	27.2727	35.2941	35.1351	21.2121	22.8571	21.6216	51.6129	60	60.6061
	16 h	52.9412	54.2857	57.8947	34.375	36.1111	42.8571	45.4545	55.8824	54.0541	36.3636	40	37.8378	80.6452	80	75.7576
	24 h	91.1765	91.4286	94.7368	46.875	55.5556	48.5714	87.8788	97.0588	91.8919	45.4545	48.5714	51.3514	100	100	100
	Table Analyzed
	Two-way ANOVA	Ordinary
	Alpha	0.05
	Source of Variation	% of total variation	P value	P value summary	Significant?
	Interaction	6.652	<0.0001	****	Yes
	Row Factor	49.84	<0.0001	****	Yes
	Column Factor	42.15	<0.0001	****	Yes
	ANOVA table	SS	DF	MS	F (DFn, DFd)	P value
	Interaction	1821	8	227.7	F (8, 30) = 18.40	P<0.0001
	Row Factor	13646	2	6823	F (2, 30) = 551.5	P<0.0001
	Column Factor	11540	4	2885	F (4, 30) = 233.2	P<0.0001
	Residual	371.1	30	12.37
	Data summary
	Number of columns (Column Factor)	5
	Number of rows (Row Factor)	3
	Number of values	45
	Within each row, compare columns (simple effects within rows)
	Number of families	3
	Number of comparisons per family	10
	Alpha	0.05
	Tukey's multiple comparisons test	Mean Diff.	95.00% CI of diff.	Significant?	Summary	Adjusted P Value
	8
	WT vs. Slwrky73	11.74	3.408 to 20.07	Yes	**	0.0026
	WT vs. Slwrky73 SlWRKY73	2.879	-5.451 to 11.21	No	ns	0.8522
	WT vs. Slwrky73 SlWRKY73S178A	13.55	5.219 to 21.88	Yes	***	0.0005
	WT vs. Slwrky73 SlWRKY73S178D	-21.96	-30.29 to -13.63	Yes	****	<0.0001
	Slwrky73 vs. Slwrky73 SlWRKY73	-8.859	-17.19 to -0.5294	Yes	*	0.0327
	Slwrky73 vs. Slwrky73 SlWRKY73S178A	1.811	-6.519 to 10.14	No	ns	0.9689
	Slwrky73 vs. Slwrky73 SlWRKY73S178D	-33.7	-42.03 to -25.37	Yes	****	<0.0001
	Slwrky73 SlWRKY73 vs. Slwrky73 SlWRKY73S178A	10.67	2.341 to 19.00	Yes	**	0.0069
	Slwrky73 SlWRKY73 vs. Slwrky73 SlWRKY73S178D	-24.84	-33.17 to -16.51	Yes	****	<0.0001
	Slwrky73 SlWRKY73S178A vs. Slwrky73 SlWRKY73S178D	-35.51	-43.84 to -27.18	Yes	****	<0.0001
	16
	WT vs. Slwrky73	17.26	8.930 to 25.59	Yes	****	<0.0001
	WT vs. Slwrky73 SlWRKY73	3.244	-5.086 to 11.57	No	ns	0.7898
	WT vs. Slwrky73 SlWRKY73S178A	16.97	8.644 to 25.30	Yes	****	<0.0001
	WT vs. Slwrky73 SlWRKY73S178D	-23.76	-32.09 to -15.43	Yes	****	<0.0001
	Slwrky73 vs. Slwrky73 SlWRKY73	-14.02	-22.35 to -5.686	Yes	***	0.0003
	Slwrky73 vs. Slwrky73 SlWRKY73S178A	-0.2861	-8.616 to 8.044	No	ns	>0.9999
	Slwrky73 vs. Slwrky73 SlWRKY73S178D	-41.02	-49.35 to -32.69	Yes	****	<0.0001
	Slwrky73 SlWRKY73 vs. Slwrky73 SlWRKY73S178A	13.73	5.400 to 22.06	Yes	***	0.0004
	Slwrky73 SlWRKY73 vs. Slwrky73 SlWRKY73S178D	-27	-35.33 to -18.67	Yes	****	<0.0001
	Slwrky73 SlWRKY73S178A vs. Slwrky73 SlWRKY73S178D	-40.73	-49.06 to -32.40	Yes	****	<0.0001
	24
	WT vs. Slwrky73	42.11	33.78 to 50.44	Yes	****	<0.0001
	WT vs. Slwrky73 SlWRKY73	0.1708	-8.159 to 8.501	No	ns	>0.9999
	WT vs. Slwrky73 SlWRKY73S178A	43.99	35.66 to 52.32	Yes	****	<0.0001
	WT vs. Slwrky73 SlWRKY73S178D	-7.553	-15.88 to 0.7771	No	ns	0.09
	Slwrky73 vs. Slwrky73 SlWRKY73	-41.94	-50.27 to -33.61	Yes	****	<0.0001
	Slwrky73 vs. Slwrky73 SlWRKY73S178A	1.875	-6.455 to 10.20	No	ns	0.9648
	Slwrky73 vs. Slwrky73 SlWRKY73S178D	-49.67	-58.00 to -41.34	Yes	****	<0.0001
	Slwrky73 SlWRKY73 vs. Slwrky73 SlWRKY73S178A	43.82	35.49 to 52.15	Yes	****	<0.0001
	Slwrky73 SlWRKY73 vs. Slwrky73 SlWRKY73S178D	-7.723	-16.05 to 0.6063	No	ns	0.0794
	Slwrky73 SlWRKY73S178A vs. Slwrky73 SlWRKY73S178D	-51.54	-59.87 to -43.21	Yes	****	<0.0001
	Test details	Mean 1	Mean 2	Mean Diff.	SE of diff.	N1	N2	q	DF
	8
	WT vs. Slwrky73	35.45	23.71	11.74	2.872	3	3	5.78	30
	WT vs. Slwrky73 SlWRKY73	35.45	32.57	2.879	2.872	3	3	1.418	30
	WT vs. Slwrky73 SlWRKY73S178A	35.45	21.9	13.55	2.872	3	3	6.672	30
	WT vs. Slwrky73 SlWRKY73S178D	35.45	57.41	-21.96	2.872	3	3	10.81	30
	Slwrky73 vs. Slwrky73 SlWRKY73	23.71	32.57	-8.859	2.872	3	3	4.363	30
	Slwrky73 vs. Slwrky73 SlWRKY73S178A	23.71	21.9	1.811	2.872	3	3	0.8919	30
	Slwrky73 vs. Slwrky73 SlWRKY73S178D	23.71	57.41	-33.7	2.872	3	3	16.59	30
	Slwrky73 SlWRKY73 vs. Slwrky73 SlWRKY73S178A	32.57	21.9	10.67	2.872	3	3	5.255	30
	Slwrky73 SlWRKY73 vs. Slwrky73 SlWRKY73S178D	32.57	57.41	-24.84	2.872	3	3	12.23	30
	Slwrky73 SlWRKY73S178A vs. Slwrky73 SlWRKY73S178D	21.9	57.41	-35.51	2.872	3	3	17.49	30
	16
	WT vs. Slwrky73	55.04	37.78	17.26	2.872	3	3	8.5	30
	WT vs. Slwrky73 SlWRKY73	55.04	51.8	3.244	2.872	3	3	1.597	30
	WT vs. Slwrky73 SlWRKY73S178A	55.04	38.07	16.97	2.872	3	3	8.359	30
	WT vs. Slwrky73 SlWRKY73S178D	55.04	78.8	-23.76	2.872	3	3	11.7	30
	Slwrky73 vs. Slwrky73 SlWRKY73	37.78	51.8	-14.02	2.872	3	3	6.902	30
	Slwrky73 vs. Slwrky73 SlWRKY73S178A	37.78	38.07	-0.2861	2.872	3	3	0.1409	30
	Slwrky73 vs. Slwrky73 SlWRKY73S178D	37.78	78.8	-41.02	2.872	3	3	20.2	30
	Slwrky73 SlWRKY73 vs. Slwrky73 SlWRKY73S178A	51.8	38.07	13.73	2.872	3	3	6.761	30
	Slwrky73 SlWRKY73 vs. Slwrky73 SlWRKY73S178D	51.8	78.8	-27	2.872	3	3	13.3	30
	Slwrky73 SlWRKY73S178A vs. Slwrky73 SlWRKY73S178D	38.07	78.8	-40.73	2.872	3	3	20.06	30
	24
	WT vs. Slwrky73	92.45	50.33	42.11	2.872	3	3	20.74	30
	WT vs. Slwrky73 SlWRKY73	92.45	92.28	0.1708	2.872	3	3	0.08411	30
	WT vs. Slwrky73 SlWRKY73S178A	92.45	48.46	43.99	2.872	3	3	21.66	30
	WT vs. Slwrky73 SlWRKY73S178D	92.45	100	-7.553	2.872	3	3	3.719	30
	Slwrky73 vs. Slwrky73 SlWRKY73	50.33	92.28	-41.94	2.872	3	3	20.65	30
	Slwrky73 vs. Slwrky73 SlWRKY73S178A	50.33	48.46	1.875	2.872	3	3	0.9233	30
	Slwrky73 vs. Slwrky73 SlWRKY73S178D	50.33	100	-49.67	2.872	3	3	24.46	30
	Slwrky73 SlWRKY73 vs. Slwrky73 SlWRKY73S178A	92.28	48.46	43.82	2.872	3	3	21.58	30
	Slwrky73 SlWRKY73 vs. Slwrky73 SlWRKY73S178D	92.28	100	-7.723	2.872	3	3	3.803	30
	Slwrky73 SlWRKY73S178A vs. Slwrky73 SlWRKY73S178D	48.46	100	-51.54	2.872	3	3	25.38	30
Fig. 8C	date
	WT	Slwrky73	Slwrky73 SlWRKY73	Slwrky73 SlWRKY73S178A	Slwrky73 SlWRKY73S178D
	124.636	13.433	159.181	14.432	905.045
	143.142	16.189	125.861	11.847	755.423
	167.982	14.573	117.36	9.089	824.13
	Table Analyzed
	Data sets analyzed	A-E
	ANOVA summary
	F	266.8
	P value	<0.0001
	P value summary	****
	Significant diff. among means (P < 0.05)?	Yes
	R squared	0.9907
	Brown-Forsythe test
	F (DFn, DFd)	2.503 (4, 10)
	P value	0.1091
	P value summary	ns
	Are SDs significantly different (P < 0.05)?	No
	Bartlett's test
	Bartlett's statistic (corrected)
	P value
	P value summary
	Are SDs significantly different (P < 0.05)?
	ANOVA table	SS	DF	MS	F (DFn, DFd)	P value
	Treatment (between columns)	1404362	4	351090	F (4, 10) = 266.8	P<0.0001
	Residual (within columns)	13160	10	1316
	Total	1417521	14
	Data summary
	Number of treatments (columns)	5
	Number of values (total)	15
	Number of families	1
	Number of comparisons per family	10
	Alpha	0.05
	Tukey's multiple comparisons test	Mean Diff.	95.00% CI of diff.	Significant?	Summary	Adjusted P Value
	WT vs. Slwrky73	130.5	33.04 to 228.0	Yes	**	0.009	A-B
	WT vs. Slwrky73 SlWRKY73	11.12	-86.36 to 108.6	No	ns	0.9951	A-C
	WT vs. Slwrky73 SlWRKY73S178A	133.5	35.98 to 230.9	Yes	**	0.0078	A-D
	WT vs. Slwrky73 SlWRKY73S178D	-682.9	-780.4 to -585.5	Yes	****	<0.0001	A-E
	Slwrky73 vs. Slwrky73 SlWRKY73	-119.4	-216.9 to -21.92	Yes	*	0.0159	B-C
	Slwrky73 vs. Slwrky73 SlWRKY73S178A	2.942	-94.54 to 100.4	No	ns	>0.9999	B-D
	Slwrky73 vs. Slwrky73 SlWRKY73S178D	-813.5	-910.9 to -716.0	Yes	****	<0.0001	B-E
	Slwrky73 SlWRKY73 vs. Slwrky73 SlWRKY73S178A	122.3	24.86 to 219.8	Yes	*	0.0137	C-D
	Slwrky73 SlWRKY73 vs. Slwrky73 SlWRKY73S178D	-694.1	-791.5 to -596.6	Yes	****	<0.0001	C-E
	Slwrky73 SlWRKY73S178A vs. Slwrky73 SlWRKY73S178D	-816.4	-913.9 to -718.9	Yes	****	<0.0001	D-E
	Test details	Mean 1	Mean 2	Mean Diff.	SE of diff.	n1	n2	q	DF
	WT vs. Slwrky73	145.3	14.73	130.5	29.62	3	3	6.232	10
	WT vs. Slwrky73 SlWRKY73	145.3	134.1	11.12	29.62	3	3	0.5309	10
	WT vs. Slwrky73 SlWRKY73S178A	145.3	11.79	133.5	29.62	3	3	6.372	10
	WT vs. Slwrky73 SlWRKY73S178D	145.3	828.2	-682.9	29.62	3	3	32.61	10
	Slwrky73 vs. Slwrky73 SlWRKY73	14.73	134.1	-119.4	29.62	3	3	5.701	10
	Slwrky73 vs. Slwrky73 SlWRKY73S178A	14.73	11.79	2.942	29.62	3	3	0.1405	10
	Slwrky73 vs. Slwrky73 SlWRKY73S178D	14.73	828.2	-813.5	29.62	3	3	38.84	10
	Slwrky73 SlWRKY73 vs. Slwrky73 SlWRKY73S178A	134.1	11.79	122.3	29.62	3	3	5.841	10
	Slwrky73 SlWRKY73 vs. Slwrky73 SlWRKY73S178D	134.1	828.2	-694.1	29.62	3	3	33.14	10
	Slwrky73 SlWRKY73S178A vs. Slwrky73 SlWRKY73S178D	11.79	828.2	-816.4	29.62	3	3	38.98	10

## Sheet: Fig.9
Fig. 9A	date
		Slmapk3			Slmapk3 L-DOPA			pTRV2:SlMAPK1/2/3			pTRV2:SlMAPK1/2/3 L-DOPA
	0 h	0	0	0	0	0	0	0	0	0	0	0	0
	8 h	25	25	19.3548	23.3333	25.7143	20	15.1515	13.8889	16.6667	17.1429	15.1515	16.129
	16 h	40.625	38.8889	38.7097	40	42.8571	40	27.2727	30.5556	33.3333	25.7143	36.3636	35.4839
	24 h	50	55.5556	51.6129	53.3333	57.1429	48.5714	42.4242	44.4444	47.2222	40	48.4849	45.1613
	32 h	56.25	63.8889	64.5161	63.3333	65.7143	57.1429	51.5151	50	52.7778	48.5714	54.5455	51.6129
	Gompertz growth
	Best-fit values
	YM	64.67	64.34	56.96	55.19
	Y0	3.459	3.152	1.91	1.945
	K	0.1154	0.1219	0.109	0.1172
	1/K	8.664	8.206	9.178	8.535
	95% CI (profile likelihood)
	YM	57.74 to 76.08	57.84 to 74.61	51.85 to 64.50	48.59 to 66.81
	Y0	1.019 to 6.778	0.7990 to 6.485	0.6822 to 3.655	0.2689 to 4.911
	K	0.08178 to 0.1593	0.08699 to 0.1686	0.08518 to 0.1372	0.07929 to 0.1689
	1/K	6.278 to 12.23	5.931 to 11.50	7.288 to 11.74	5.919 to 12.61
	Goodness of Fit
	Degrees of Freedom	12	12	12	12
	R squared	0.9778	0.9781	0.9891	0.9733
	Sum of Squares	161.1	163.4	58.79	145.1
	Sy.x	3.664	3.69	2.213	3.478
	Constraints
	Y0	Y0 > 0	Y0 > 0	Y0 > 0	Y0 > 0
	K	K > 0	K > 0	K > 0	K > 0
	Number of points
	# of X values	15	15	15	15
	# Y values analyzed	15	15	15	15
	Table Analyzed
	Two-way ANOVA	Ordinary
	Alpha	0.05
	Source of Variation	% of total variation	P value	P value summary	Significant?
	Interaction	0.763	0.0582	ns	No
	Row Factor	95.19	<0.0001	****	Yes
	Column Factor	2.735	<0.0001	****	Yes
	ANOVA table	SS	DF	MS	F (DFn, DFd)	P value
	Interaction	200.4	12	16.7	F (12, 40) = 1.941	P=0.0582
	Row Factor	25001	4	6250	F (4, 40) = 726.4	P<0.0001
	Column Factor	718.4	3	239.5	F (3, 40) = 27.83	P<0.0001
	Residual	344.2	40	8.604
	Data summary
	Number of columns (Column Factor)	4
	Number of rows (Row Factor)	5
	Number of values	60
	Within each row, compare columns (simple effects within rows)
	Number of families	5
	Number of comparisons per family	6
	Alpha	0.05
	Tukey's multiple comparisons test	Mean Diff.	95.00% CI of diff.	Significant?	Summary	Adjusted P Value
	0
	Slmapk3 vs. Slmapk3 L-DOPA	0	-6.420 to 6.420	No	ns	>0.9999
	Slmapk3 vs. pTRV2:SlMAPK1/2/3	0	-6.420 to 6.420	No	ns	>0.9999
	Slmapk3 vs. pTRV2:SlMAPK1/2/3 L-DOPA	0	-6.420 to 6.420	No	ns	>0.9999
	Slmapk3 L-DOPA vs. pTRV2:SlMAPK1/2/3	0	-6.420 to 6.420	No	ns	>0.9999
	Slmapk3 L-DOPA vs. pTRV2:SlMAPK1/2/3 L-DOPA	0	-6.420 to 6.420	No	ns	>0.9999
	pTRV2:SlMAPK1/2/3 vs. pTRV2:SlMAPK1/2/3 L-DOPA	0	-6.420 to 6.420	No	ns	>0.9999
	8
	Slmapk3 vs. Slmapk3 L-DOPA	0.1024	-6.317 to 6.522	No	ns	>0.9999
	Slmapk3 vs. pTRV2:SlMAPK1/2/3	7.883	1.463 to 14.30	Yes	*	0.0108
	Slmapk3 vs. pTRV2:SlMAPK1/2/3 L-DOPA	6.977	0.5576 to 13.40	Yes	*	0.0286
	Slmapk3 L-DOPA vs. pTRV2:SlMAPK1/2/3	7.78	1.361 to 14.20	Yes	*	0.0121
	Slmapk3 L-DOPA vs. pTRV2:SlMAPK1/2/3 L-DOPA	6.875	0.4552 to 13.29	Yes	*	0.0318
	pTRV2:SlMAPK1/2/3 vs. pTRV2:SlMAPK1/2/3 L-DOPA	-0.9054	-7.325 to 5.514	No	ns	0.9813
	16
	Slmapk3 vs. Slmapk3 L-DOPA	-1.545	-7.964 to 4.875	No	ns	0.9167
	Slmapk3 vs. pTRV2:SlMAPK1/2/3	9.021	2.601 to 15.44	Yes	**	0.0029
	Slmapk3 vs. pTRV2:SlMAPK1/2/3 L-DOPA	6.887	0.4677 to 13.31	Yes	*	0.0314
	Slmapk3 L-DOPA vs. pTRV2:SlMAPK1/2/3	10.57	4.146 to 16.98	Yes	***	0.0004
	Slmapk3 L-DOPA vs. pTRV2:SlMAPK1/2/3 L-DOPA	8.432	2.012 to 14.85	Yes	**	0.0058
	pTRV2:SlMAPK1/2/3 vs. pTRV2:SlMAPK1/2/3 L-DOPA	-2.133	-8.553 to 4.286	No	ns	0.8096
	24
	Slmapk3 vs. Slmapk3 L-DOPA	-0.6264	-7.046 to 5.793	No	ns	0.9936
	Slmapk3 vs. pTRV2:SlMAPK1/2/3	7.693	1.273 to 14.11	Yes	*	0.0133
	Slmapk3 vs. pTRV2:SlMAPK1/2/3 L-DOPA	7.841	1.421 to 14.26	Yes	*	0.0113
	Slmapk3 L-DOPA vs. pTRV2:SlMAPK1/2/3	8.319	1.899 to 14.74	Yes	**	0.0066
	Slmapk3 L-DOPA vs. pTRV2:SlMAPK1/2/3 L-DOPA	8.467	2.048 to 14.89	Yes	**	0.0055
	pTRV2:SlMAPK1/2/3 vs. pTRV2:SlMAPK1/2/3 L-DOPA	0.1483	-6.271 to 6.568	No	ns	>0.9999
	32
	Slmapk3 vs. Slmapk3 L-DOPA	-0.5118	-6.931 to 5.908	No	ns	0.9965
	Slmapk3 vs. pTRV2:SlMAPK1/2/3	10.12	3.701 to 16.54	Yes	***	0.0007
	Slmapk3 vs. pTRV2:SlMAPK1/2/3 L-DOPA	9.975	3.556 to 16.39	Yes	***	0.0009
	Slmapk3 L-DOPA vs. pTRV2:SlMAPK1/2/3	10.63	4.213 to 17.05	Yes	***	0.0004
	Slmapk3 L-DOPA vs. pTRV2:SlMAPK1/2/3 L-DOPA	10.49	4.067 to 16.91	Yes	***	0.0005
	pTRV2:SlMAPK1/2/3 vs. pTRV2:SlMAPK1/2/3 L-DOPA	-0.1456	-6.565 to 6.274	No	ns	>0.9999
	Test details	Mean 1	Mean 2	Mean Diff.	SE of diff.	N1	N2	q	DF
	0
	Slmapk3 vs. Slmapk3 L-DOPA	0	0	0	2.395	3	3	0	40
	Slmapk3 vs. pTRV2:SlMAPK1/2/3	0	0	0	2.395	3	3	0	40
	Slmapk3 vs. pTRV2:SlMAPK1/2/3 L-DOPA	0	0	0	2.395	3	3	0	40
	Slmapk3 L-DOPA vs. pTRV2:SlMAPK1/2/3	0	0	0	2.395	3	3	0	40
	Slmapk3 L-DOPA vs. pTRV2:SlMAPK1/2/3 L-DOPA	0	0	0	2.395	3	3	0	40
	pTRV2:SlMAPK1/2/3 vs. pTRV2:SlMAPK1/2/3 L-DOPA	0	0	0	2.395	3	3	0	40
	8
	Slmapk3 vs. Slmapk3 L-DOPA	23.12	23.02	0.1024	2.395	3	3	0.06047	40
	Slmapk3 vs. pTRV2:SlMAPK1/2/3	23.12	15.24	7.883	2.395	3	3	4.655	40
	Slmapk3 vs. pTRV2:SlMAPK1/2/3 L-DOPA	23.12	16.14	6.977	2.395	3	3	4.12	40
	Slmapk3 L-DOPA vs. pTRV2:SlMAPK1/2/3	23.02	15.24	7.78	2.395	3	3	4.594	40
	Slmapk3 L-DOPA vs. pTRV2:SlMAPK1/2/3 L-DOPA	23.02	16.14	6.875	2.395	3	3	4.059	40
	pTRV2:SlMAPK1/2/3 vs. pTRV2:SlMAPK1/2/3 L-DOPA	15.24	16.14	-0.9054	2.395	3	3	0.5347	40
	16
	Slmapk3 vs. Slmapk3 L-DOPA	39.41	40.95	-1.545	2.395	3	3	0.912	40
	Slmapk3 vs. pTRV2:SlMAPK1/2/3	39.41	30.39	9.021	2.395	3	3	5.327	40
	Slmapk3 vs. pTRV2:SlMAPK1/2/3 L-DOPA	39.41	32.52	6.887	2.395	3	3	4.067	40
	Slmapk3 L-DOPA vs. pTRV2:SlMAPK1/2/3	40.95	30.39	10.57	2.395	3	3	6.239	40
	Slmapk3 L-DOPA vs. pTRV2:SlMAPK1/2/3 L-DOPA	40.95	32.52	8.432	2.395	3	3	4.979	40
	pTRV2:SlMAPK1/2/3 vs. pTRV2:SlMAPK1/2/3 L-DOPA	30.39	32.52	-2.133	2.395	3	3	1.26	40
	24
	Slmapk3 vs. Slmapk3 L-DOPA	52.39	53.02	-0.6264	2.395	3	3	0.3699	40
	Slmapk3 vs. pTRV2:SlMAPK1/2/3	52.39	44.7	7.693	2.395	3	3	4.542	40
	Slmapk3 vs. pTRV2:SlMAPK1/2/3 L-DOPA	52.39	44.55	7.841	2.395	3	3	4.63	40
	Slmapk3 L-DOPA vs. pTRV2:SlMAPK1/2/3	53.02	44.7	8.319	2.395	3	3	4.912	40
	Slmapk3 L-DOPA vs. pTRV2:SlMAPK1/2/3 L-DOPA	53.02	44.55	8.467	2.395	3	3	5	40
	pTRV2:SlMAPK1/2/3 vs. pTRV2:SlMAPK1/2/3 L-DOPA	44.7	44.55	0.1483	2.395	3	3	0.08754	40
	32
	Slmapk3 vs. Slmapk3 L-DOPA	61.55	62.06	-0.5118	2.395	3	3	0.3022	40
	Slmapk3 vs. pTRV2:SlMAPK1/2/3	61.55	51.43	10.12	2.395	3	3	5.976	40
	Slmapk3 vs. pTRV2:SlMAPK1/2/3 L-DOPA	61.55	51.58	9.975	2.395	3	3	5.89	40
	Slmapk3 L-DOPA vs. pTRV2:SlMAPK1/2/3	62.06	51.43	10.63	2.395	3	3	6.278	40
	Slmapk3 L-DOPA vs. pTRV2:SlMAPK1/2/3 L-DOPA	62.06	51.58	10.49	2.395	3	3	6.192	40
	pTRV2:SlMAPK1/2/3 vs. pTRV2:SlMAPK1/2/3 L-DOPA	51.43	51.58	-0.1456	2.395	3	3	0.08599	40
	0	3.45933	3.15187	1.90958	1.94493
	0.032032	3.49692	3.18913	1.93231	1.96946
	0.0640641	3.53477	3.22667	1.95522	1.9942
	0.0960961	3.57289	3.26451	1.97833	2.01916
	0.128128	3.61128	3.30265	2.00162	2.04434
	0.16016	3.64994	3.34108	2.02511	2.06974
	0.192192	3.68886	3.3798	2.04879	2.09535
	0.224224	3.72806	3.41882	2.07266	2.12118
	0.256256	3.76753	3.45813	2.09673	2.14724
	0.288288	3.80726	3.49774	2.12099	2.17351
	0.32032	3.84727	3.53765	2.14545	2.20001
	0.352352	3.88754	3.57785	2.1701	2.22672
	0.384384	3.92809	3.61835	2.19495	2.25366
	0.416416	3.96891	3.65915	2.21999	2.28083
	0.448448	4.01	3.70025	2.24523	2.30822
	0.48048	4.05136	3.74165	2.27067	2.33583
	0.512513	4.09299	3.78334	2.2963	2.36366
	0.544545	4.13489	3.82534	2.32214	2.39172
	0.576577	4.17707	3.86764	2.34817	2.42001
	0.608609	4.21951	3.91023	2.3744	2.44853
	0.640641	4.26223	3.95313	2.40084	2.47727
	0.672673	4.30523	3.99632	2.42747	2.50624
	0.704705	4.34849	4.03982	2.45431	2.53544
	0.736737	4.39203	4.08362	2.48134	2.56487
	0.768769	4.43584	4.12772	2.50858	2.59452
	0.800801	4.47992	4.17212	2.53602	2.62441
	0.832833	4.52428	4.21683	2.56367	2.65453
	0.864865	4.56891	4.26183	2.59152	2.68487
	0.896897	4.61381	4.30714	2.61957	2.71545
	0.928929	4.65899	4.35275	2.64782	2.74626
	0.960961	4.70444	4.39866	2.67629	2.77731
	0.992993	4.75016	4.44488	2.70495	2.80858
	1.02503	4.79615	4.4914	2.73382	2.84009
	1.05706	4.84242	4.53822	2.7629	2.87183
	1.08909	4.88896	4.58534	2.79218	2.90381
	1.12112	4.93578	4.63277	2.82167	2.93602
	1.15315	4.98286	4.6805	2.85137	2.96846
	1.18519	5.03023	4.72853	2.88128	3.00114
	1.21722	5.07786	4.77686	2.91139	3.03406
	1.24925	5.12576	4.8255	2.94171	3.06721
	1.28128	5.17394	4.87444	2.97224	3.1006
	1.31331	5.22239	4.92369	3.00298	3.13422
	1.34535	5.27112	4.97323	3.03393	3.16808
	1.37738	5.32011	5.02308	3.06508	3.20218
	1.40941	5.36938	5.07323	3.09645	3.23651
	1.44144	5.41892	5.12369	3.12803	3.27108
	1.47347	5.46873	5.17444	3.15981	3.30589
	1.50551	5.51882	5.2255	3.19181	3.34094
	1.53754	5.56917	5.27686	3.22402	3.37622
	1.56957	5.6198	5.32853	3.25644	3.41174
	1.6016	5.67069	5.38049	3.28907	3.44751
	1.63363	5.72186	5.43276	3.32191	3.48351
	1.66567	5.7733	5.48532	3.35497	3.51975
	1.6977	5.82501	5.53819	3.38823	3.55623
	1.72973	5.87698	5.59136	3.42171	3.59294
	1.76176	5.92923	5.64482	3.4554	3.6299
	1.79379	5.98175	5.69859	3.48931	3.6671
	1.82583	6.03453	5.75266	3.52342	3.70454
	1.85786	6.08758	5.80703	3.55775	3.74221
	1.88989	6.1409	5.86169	3.59229	3.78013
	1.92192	6.19449	5.91666	3.62705	3.81829
	1.95395	6.24835	5.97192	3.66202	3.85668
	1.98599	6.30247	6.02748	3.6972	3.89532
	2.01802	6.35686	6.08334	3.7326	3.9342
	2.05005	6.41151	6.1395	3.76821	3.97331
	2.08208	6.46643	6.19595	3.80403	4.01267
	2.11411	6.52162	6.2527	3.84007	4.05227
	2.14615	6.57707	6.30974	3.87632	4.0921
	2.17818	6.63279	6.36708	3.91279	4.13218
	2.21021	6.68876	6.42471	3.94947	4.1725
	2.24224	6.74501	6.48264	3.98636	4.21306
	2.27427	6.80151	6.54086	4.02347	4.25386
	2.30631	6.85828	6.59938	4.06079	4.2949
	2.33834	6.91531	6.65818	4.09833	4.33617
	2.37037	6.9726	6.71728	4.13608	4.37769
	2.4024	7.03015	6.77667	4.17405	4.41945
	2.43443	7.08796	6.83635	4.21223	4.46145
	2.46647	7.14603	6.89632	4.25062	4.50368
	2.4985	7.20435	6.95658	4.28923	4.54616
	2.53053	7.26294	7.01713	4.32806	4.58888
	2.56256	7.32178	7.07797	4.3671	4.63183
	2.59459	7.38089	7.13909	4.40635	4.67502
	2.62663	7.44024	7.2005	4.44581	4.71846
	2.65866	7.49986	7.2622	4.48549	4.76213
	2.69069	7.55972	7.32418	4.52539	4.80604
	2.72272	7.61985	7.38644	4.5655	4.85018
	2.75475	7.68022	7.44899	4.60582	4.89457
	2.78679	7.74085	7.51183	4.64636	4.93919
	2.81882	7.80173	7.57494	4.68711	4.98405
	2.85085	7.86286	7.63834	4.72807	5.02915
	2.88288	7.92425	7.70201	4.76925	5.07448
	2.91491	7.98588	7.76597	4.81064	5.12005
	2.94695	8.04776	7.83021	4.85224	5.16586
	2.97898	8.10989	7.89472	4.89406	5.2119
	3.01101	8.17227	7.95951	4.93609	5.25818
	3.04304	8.2349	8.02457	4.97833	5.3047
	3.07508	8.29777	8.08992	5.02078	5.35144
	3.10711	8.36089	8.15553	5.06345	5.39843
	3.13914	8.42425	8.22142	5.10633	5.44565
	3.17117	8.48786	8.28758	5.14942	5.4931
	3.2032	8.5517	8.35402	5.19272	5.54078
	3.23524	8.61579	8.42072	5.23623	5.5887
	3.26727	8.68013	8.4877	5.27996	5.63685
	3.2993	8.7447	8.55494	5.32389	5.68523
	3.33133	8.80951	8.62245	5.36804	5.73384
	3.36336	8.87456	8.69022	5.41239	5.78269
	3.3954	8.93985	8.75827	5.45696	5.83176
	3.42743	9.00537	8.82657	5.50174	5.88107
	3.45946	9.07113	8.89514	5.54672	5.93061
	3.49149	9.13712	8.96398	5.59192	5.98037
	3.52352	9.20335	9.03307	5.63732	6.03037
	3.55556	9.26981	9.10243	5.68293	6.08059
	3.58759	9.33651	9.17204	5.72875	6.13104
	3.61962	9.40343	9.24191	5.77478	6.18172
	3.65165	9.47059	9.31204	5.82101	6.23262
	3.68368	9.53797	9.38242	5.86746	6.28375
	3.71572	9.60558	9.45306	5.91411	6.33511
	3.74775	9.67342	9.52396	5.96096	6.38669
	3.77978	9.74149	9.5951	6.00802	6.43849
	3.81181	9.80978	9.6665	6.05529	6.49052
	3.84384	9.87829	9.73814	6.10276	6.54277
	3.87588	9.94703	9.81004	6.15044	6.59525
	3.90791	10.016	9.88218	6.19832	6.64794
	3.93994	10.0852	9.95457	6.24641	6.70086
	3.97197	10.1546	10.0272	6.2947	6.754
	4.004	10.2242	10.1001	6.34319	6.80736
	4.03604	10.294	10.1732	6.39189	6.86094
	4.06807	10.3641	10.2466	6.44078	6.91473
	4.1001	10.4343	10.3202	6.48988	6.96875
	4.13213	10.5048	10.394	6.53918	7.02298
	4.16416	10.5755	10.4681	6.58869	7.07743
	4.1962	10.6464	10.5424	6.63839	7.13209
	4.22823	10.7176	10.617	6.68829	7.18697
	4.26026	10.7889	10.6917	6.73839	7.24206
	4.29229	10.8604	10.7668	6.78869	7.29737
	4.32432	10.9322	10.842	6.83919	7.35289
	4.35636	11.0041	10.9175	6.88988	7.40862
	4.38839	11.0763	10.9932	6.94077	7.46456
	4.42042	11.1486	11.0691	6.99186	7.52072
	4.45245	11.2212	11.1453	7.04315	7.57708
	4.48448	11.294	11.2217	7.09463	7.63365
	4.51652	11.3669	11.2983	7.14631	7.69043
	4.54855	11.4401	11.3751	7.19818	7.74742
	4.58058	11.5135	11.4521	7.25024	7.80461
	4.61261	11.587	11.5294	7.3025	7.86201
	4.64464	11.6608	11.6069	7.35495	7.91961
	4.67668	11.7348	11.6846	7.40759	7.97742
	4.70871	11.8089	11.7625	7.46042	8.03543
	4.74074	11.8832	11.8406	7.51345	8.09365
	4.77277	11.9578	11.919	7.56666	8.15206
	4.8048	12.0325	11.9975	7.62006	8.21068
	4.83684	12.1074	12.0763	7.67366	8.26949
	4.86887	12.1825	12.1552	7.72744	8.3285
	4.9009	12.2578	12.2344	7.7814	8.38771
	4.93293	12.3333	12.3138	7.83556	8.44712
	4.96496	12.4089	12.3933	7.8899	8.50672
	4.997	12.4847	12.4731	7.94443	8.56652
	5.02903	12.5608	12.5531	7.99914	8.62651
	5.06106	12.6369	12.6333	8.05404	8.6867
	5.09309	12.7133	12.7136	8.10912	8.74708
	5.12513	12.7899	12.7942	8.16438	8.80765
	5.15716	12.8666	12.875	8.21982	8.8684
	5.18919	12.9435	12.9559	8.27545	8.92935
	5.22122	13.0206	13.0371	8.33125	8.99049
	5.25325	13.0978	13.1184	8.38724	9.05181
	5.28529	13.1752	13.1999	8.44341	9.11332
	5.31732	13.2528	13.2816	8.49975	9.17501
	5.34935	13.3306	13.3635	8.55627	9.23689
	5.38138	13.4085	13.4456	8.61297	9.29895
	5.41341	13.4866	13.5278	8.66985	9.3612
	5.44545	13.5648	13.6103	8.7269	9.42362
	5.47748	13.6432	13.6929	8.78412	9.48623
	5.50951	13.7218	13.7757	8.84152	9.54901
	5.54154	13.8005	13.8586	8.89909	9.61198
	5.57357	13.8794	13.9418	8.95684	9.67511
	5.60561	13.9585	14.0251	9.01475	9.73843
	5.63764	14.0377	14.1086	9.07284	9.80192
	5.66967	14.1171	14.1922	9.1311	9.86558
	5.7017	14.1966	14.276	9.18952	9.92942
	5.73373	14.2762	14.36	9.24812	9.99343
	5.76577	14.3561	14.4441	9.30688	10.0576
	5.7978	14.436	14.5285	9.36581	10.122
	5.82983	14.5161	14.6129	9.4249	10.1865
	5.86186	14.5964	14.6976	9.48416	10.2512
	5.89389	14.6768	14.7823	9.54358	10.316
	5.92593	14.7573	14.8673	9.60317	10.381
	5.95796	14.838	14.9524	9.66292	10.4462
	5.98999	14.9189	15.0376	9.72283	10.5115
	6.02202	14.9998	15.123	9.7829	10.577
	6.05405	15.081	15.2086	9.84313	10.6427
	6.08609	15.1622	15.2943	9.90352	10.7085
	6.11812	15.2436	15.3801	9.96407	10.7745
	6.15015	15.3251	15.4661	10.0248	10.8406
	6.18218	15.4067	15.5522	10.0856	10.9069
	6.21421	15.4885	15.6385	10.1467	10.9734
	6.24625	15.5704	15.7249	10.2078	11.04
	6.27828	15.6525	15.8115	10.2692	11.1067
	6.31031	15.7346	15.8981	10.3306	11.1737
	6.34234	15.8169	15.985	10.3923	11.2407
	6.37437	15.8994	16.0719	10.454	11.3079
	6.40641	15.9819	16.159	10.516	11.3753
	6.43844	16.0646	16.2462	10.5781	11.4428
	6.47047	16.1473	16.3336	10.6403	11.5104
	6.5025	16.2302	16.421	10.7027	11.5782
	6.53453	16.3132	16.5086	10.7652	11.6461
	6.56657	16.3964	16.5963	10.8279	11.7142
	6.5986	16.4796	16.6842	10.8907	11.7824
	6.63063	16.563	16.7721	10.9536	11.8508
	6.66266	16.6465	16.8602	11.0167	11.9193
	6.69469	16.73	16.9484	11.08	11.9879
	6.72673	16.8137	17.0367	11.1434	12.0567
	6.75876	16.8975	17.1252	11.2069	12.1256
	6.79079	16.9814	17.2137	11.2705	12.1946
	6.82282	17.0654	17.3023	11.3343	12.2638
	6.85485	17.1496	17.3911	11.3983	12.3331
	6.88689	17.2338	17.4799	11.4623	12.4025
	6.91892	17.3181	17.5689	11.5266	12.472
	6.95095	17.4025	17.658	11.5909	12.5417
	6.98298	17.487	17.7472	11.6554	12.6115
	7.01502	17.5716	17.8364	11.72	12.6815
	7.04705	17.6563	17.9258	11.7847	12.7515
	7.07908	17.7411	18.0153	11.8496	12.8217
	7.11111	17.826	18.1048	11.9146	12.892
	7.14314	17.911	18.1945	11.9797	12.9624
	7.17518	17.9961	18.2842	12.045	13.033
	7.20721	18.0812	18.3741	12.1103	13.1036
	7.23924	18.1664	18.464	12.1758	13.1744
	7.27127	18.2518	18.554	12.2415	13.2453
	7.3033	18.3372	18.6441	12.3072	13.3163
	7.33534	18.4227	18.7343	12.3731	13.3874
	7.36737	18.5083	18.8246	12.4391	13.4586
	7.3994	18.5939	18.9149	12.5052	13.53
	7.43143	18.6796	19.0053	12.5714	13.6014
	7.46346	18.7654	19.0958	12.6378	13.673
	7.4955	18.8513	19.1864	12.7043	13.7446
	7.52753	18.9373	19.2771	12.7708	13.8164
	7.55956	19.0233	19.3678	12.8375	13.8882
	7.59159	19.1094	19.4586	12.9044	13.9602
	7.62362	19.1956	19.5495	12.9713	14.0323
	7.65566	19.2818	19.6404	13.0383	14.1045
	7.68769	19.3681	19.7314	13.1055	14.1767
	7.71972	19.4545	19.8225	13.1727	14.2491
	7.75175	19.5409	19.9136	13.2401	14.3216
	7.78378	19.6274	20.0048	13.3076	14.3941
	7.81582	19.714	20.096	13.3752	14.4668
	7.84785	19.8006	20.1874	13.4429	14.5395
	7.87988	19.8873	20.2787	13.5107	14.6123
	7.91191	19.9741	20.3701	13.5786	14.6853
	7.94394	20.0608	20.4616	13.6466	14.7583
	7.97598	20.1477	20.5531	13.7147	14.8314
	8.00801	20.2346	20.6447	13.7829	14.9046
	8.04004	20.3215	20.7363	13.8512	14.9778
	8.07207	20.4086	20.828	13.9196	15.0512
	8.1041	20.4956	20.9197	13.9881	15.1246
	8.13614	20.5827	21.0115	14.0567	15.1982
	8.16817	20.6699	21.1033	14.1254	15.2718
	8.2002	20.7571	21.1952	14.1942	15.3454
	8.23223	20.8443	21.287	14.263	15.4192
	8.26426	20.9316	21.379	14.332	15.493
	8.2963	21.0189	21.4709	14.4011	15.5669
	8.32833	21.1063	21.5629	14.4702	15.6409
	8.36036	21.1937	21.6549	14.5395	15.715
	8.39239	21.2811	21.747	14.6088	15.7891
	8.42442	21.3686	21.8391	14.6783	15.8633
	8.45646	21.4561	21.9312	14.7478	15.9376
	8.48849	21.5436	22.0234	14.8174	16.0119
	8.52052	21.6312	22.1155	14.887	16.0863
	8.55255	21.7188	22.2077	14.9568	16.1607
	8.58458	21.8064	22.3	15.0266	16.2353
	8.61662	21.8941	22.3922	15.0966	16.3099
	8.64865	21.9818	22.4845	15.1666	16.3845
	8.68068	22.0695	22.5768	15.2366	16.4592
	8.71271	22.1572	22.6691	15.3068	16.534
	8.74474	22.245	22.7614	15.377	16.6088
	8.77678	22.3328	22.8537	15.4474	16.6837
	8.80881	22.4206	22.946	15.5178	16.7586
	8.84084	22.5084	23.0384	15.5882	16.8336
	8.87287	22.5963	23.1308	15.6587	16.9087
	8.9049	22.6841	23.2231	15.7294	16.9838
	8.93694	22.772	23.3155	15.8	17.0589
	8.96897	22.8599	23.4079	15.8708	17.1341
	9.001	22.9478	23.5003	15.9416	17.2094
	9.03303	23.0357	23.5927	16.0125	17.2847
	9.06507	23.1236	23.685	16.0834	17.36
	9.0971	23.2116	23.7774	16.1544	17.4354
	9.12913	23.2995	23.8698	16.2255	17.5108
	9.16116	23.3875	23.9622	16.2967	17.5863
	9.19319	23.4754	24.0546	16.3679	17.6618
	9.22523	23.5634	24.147	16.4391	17.7373
	9.25726	23.6513	24.2393	16.5105	17.8129
	9.28929	23.7393	24.3317	16.5819	17.8885
	9.32132	23.8273	24.424	16.6533	17.9642
	9.35335	23.9152	24.5164	16.7248	18.0399
	9.38539	24.0032	24.6087	16.7964	18.1156
	9.41742	24.0911	24.701	16.868	18.1913
	9.44945	24.1791	24.7933	16.9397	18.2671
	9.48148	24.2671	24.8856	17.0114	18.343
	9.51351	24.355	24.9779	17.0832	18.4188
	9.54555	24.4429	25.0701	17.155	18.4947
	9.57758	24.5309	25.1623	17.2269	18.5706
	9.60961	24.6188	25.2545	17.2988	18.6465
	9.64164	24.7067	25.3467	17.3708	18.7225
	9.67367	24.7946	25.4388	17.4428	18.7984
	9.70571	24.8825	25.531	17.5148	18.8744
	9.73774	24.9703	25.6231	17.587	18.9505
	9.76977	25.0582	25.7151	17.6591	19.0265
	9.8018	25.146	25.8072	17.7313	19.1025
	9.83383	25.2338	25.8992	17.8035	19.1786
	9.86587	25.3216	25.9912	17.8758	19.2547
	9.8979	25.4094	26.0831	17.9481	19.3308
	9.92993	25.4972	26.175	18.0205	19.4069
	9.96196	25.5849	26.2669	18.0929	19.4831
	9.99399	25.6726	26.3587	18.1653	19.5592
	10.026	25.7603	26.4505	18.2378	19.6354
	10.0581	25.8479	26.5423	18.3103	19.7115
	10.0901	25.9356	26.634	18.3829	19.7877
	10.1221	26.0232	26.7257	18.4554	19.8639
	10.1542	26.1107	26.8173	18.528	19.9401
	10.1862	26.1983	26.9089	18.6007	20.0163
	10.2182	26.2858	27.0004	18.6734	20.0925
	10.2503	26.3733	27.0919	18.7461	20.1687
	10.2823	26.4607	27.1833	18.8188	20.2449
	10.3143	26.5481	27.2747	18.8915	20.3211
	10.3463	26.6355	27.3661	18.9643	20.3973
	10.3784	26.7229	27.4574	19.0371	20.4735
	10.4104	26.8102	27.5486	19.1099	20.5496
	10.4424	26.8974	27.6398	19.1828	20.6258
	10.4745	26.9847	27.7309	19.2557	20.702
	10.5065	27.0718	27.822	19.3286	20.7782
	10.5385	27.159	27.913	19.4015	20.8544
	10.5706	27.2461	28.004	19.4744	20.9306
	10.6026	27.3331	28.0949	19.5474	21.0067
	10.6346	27.4202	28.1857	19.6203	21.0829
	10.6667	27.5071	28.2765	19.6933	21.159
	10.6987	27.594	28.3672	19.7663	21.2351
	10.7307	27.6809	28.4578	19.8394	21.3113
	10.7628	27.7677	28.5484	19.9124	21.3874
	10.7948	27.8545	28.6389	19.9854	21.4634
	10.8268	27.9412	28.7294	20.0585	21.5395
	10.8589	28.0279	28.8198	20.1316	21.6156
	10.8909	28.1145	28.9101	20.2047	21.6916
	10.9229	28.2011	29.0003	20.2777	21.7676
	10.955	28.2876	29.0905	20.3508	21.8436
	10.987	28.3741	29.1806	20.4239	21.9196
	11.019	28.4605	29.2706	20.4971	21.9956
	11.0511	28.5468	29.3606	20.5702	22.0715
	11.0831	28.6331	29.4504	20.6433	22.1474
	11.1151	28.7193	29.5402	20.7164	22.2233
	11.1471	28.8055	29.63	20.7896	22.2991
	11.1792	28.8916	29.7196	20.8627	22.375
	11.2112	28.9776	29.8092	20.9358	22.4508
	11.2432	29.0636	29.8986	21.009	22.5265
	11.2753	29.1495	29.988	21.0821	22.6023
	11.3073	29.2354	30.0773	21.1552	22.678
	11.3393	29.3212	30.1666	21.2283	22.7537
	11.3714	29.4069	30.2557	21.3015	22.8293
	11.4034	29.4926	30.3448	21.3746	22.905
	11.4354	29.5781	30.4338	21.4477	22.9805
	11.4675	29.6637	30.5227	21.5208	23.0561
	11.4995	29.7491	30.6115	21.5939	23.1316
	11.5315	29.8345	30.7002	21.667	23.2071
	11.5636	29.9198	30.7888	21.7401	23.2825
	11.5956	30.005	30.8773	21.8132	23.3579
	11.6276	30.0902	30.9658	21.8862	23.4333
	11.6597	30.1753	31.0541	21.9593	23.5086
	11.6917	30.2603	31.1424	22.0323	23.5839
	11.7237	30.3452	31.2305	22.1054	23.6591
	11.7558	30.4301	31.3186	22.1784	23.7343
	11.7878	30.5149	31.4065	22.2514	23.8094
	11.8198	30.5996	31.4944	22.3244	23.8845
	11.8519	30.6842	31.5822	22.3973	23.9596
	11.8839	30.7687	31.6699	22.4703	24.0346
	11.9159	30.8532	31.7574	22.5432	24.1096
	11.9479	30.9376	31.8449	22.6162	24.1845
	11.98	31.0219	31.9323	22.689	24.2594
	12.012	31.1061	32.0196	22.7619	24.3342
	12.044	31.1902	32.1067	22.8348	24.4089
	12.0761	31.2743	32.1938	22.9076	24.4836
	12.1081	31.3583	32.2807	22.9804	24.5583
	12.1401	31.4421	32.3676	23.0532	24.6329
	12.1722	31.5259	32.4543	23.126	24.7075
	12.2042	31.6096	32.541	23.1987	24.782
	12.2362	31.6933	32.6275	23.2714	24.8564
	12.2683	31.7768	32.7139	23.3441	24.9308
	12.3003	31.8602	32.8003	23.4168	25.0051
	12.3323	31.9436	32.8865	23.4894	25.0794
	12.3644	32.0269	32.9726	23.562	25.1536
	12.3964	32.11	33.0585	23.6346	25.2278
	12.4284	32.1931	33.1444	23.7071	25.3018
	12.4605	32.2761	33.2302	23.7796	25.3759
	12.4925	32.359	33.3158	23.8521	25.4498
	12.5245	32.4418	33.4013	23.9246	25.5238
	12.5566	32.5245	33.4868	23.997	25.5976
	12.5886	32.6071	33.5721	24.0694	25.6714
	12.6206	32.6896	33.6572	24.1417	25.7451
	12.6527	32.772	33.7423	24.214	25.8187
	12.6847	32.8543	33.8273	24.2863	25.8923
	12.7167	32.9365	33.9121	24.3585	25.9658
	12.7487	33.0187	33.9968	24.4307	26.0393
	12.7808	33.1007	34.0814	24.5029	26.1127
	12.8128	33.1826	34.1659	24.575	26.186
	12.8448	33.2644	34.2502	24.6471	26.2592
	12.8769	33.3461	34.3345	24.7191	26.3324
	12.9089	33.4278	34.4186	24.7911	26.4055
	12.9409	33.5093	34.5025	24.8631	26.4785
	12.973	33.5907	34.5864	24.935	26.5514
	13.005	33.672	34.6701	25.0068	26.6243
	13.037	33.7532	34.7538	25.0787	26.6971
	13.0691	33.8343	34.8372	25.1504	26.7699
	13.1011	33.9153	34.9206	25.2222	26.8425
	13.1331	33.9962	35.0038	25.2938	26.9151
	13.1652	34.0769	35.0869	25.3655	26.9876
	13.1972	34.1576	35.1699	25.4371	27.06
	13.2292	34.2382	35.2528	25.5086	27.1324
	13.2613	34.3186	35.3355	25.5801	27.2046
	13.2933	34.399	35.4181	25.6516	27.2768
	13.3253	34.4792	35.5006	25.7229	27.3489
	13.3574	34.5593	35.5829	25.7943	27.4209
	13.3894	34.6394	35.6651	25.8656	27.4929
	13.4214	34.7193	35.7472	25.9368	27.5648
	13.4535	34.7991	35.8291	26.008	27.6365
	13.4855	34.8787	35.9109	26.0791	27.7082
	13.5175	34.9583	35.9926	26.1502	27.7798
	13.5495	35.0378	36.0741	26.2212	27.8514
	13.5816	35.1171	36.1555	26.2922	27.9228
	13.6136	35.1963	36.2368	26.3631	27.9942
	13.6456	35.2755	36.318	26.434	28.0655
	13.6777	35.3545	36.399	26.5048	28.1366
	13.7097	35.4333	36.4798	26.5755	28.2077
	13.7417	35.5121	36.5605	26.6462	28.2788
	13.7738	35.5908	36.6411	26.7168	28.3497
	13.8058	35.6693	36.7216	26.7873	28.4205
	13.8378	35.7477	36.8019	26.8578	28.4913
	13.8699	35.826	36.8821	26.9283	28.5619
	13.9019	35.9042	36.9621	26.9987	28.6325
	13.9339	35.9822	37.042	27.069	28.703
	13.966	36.0602	37.1218	27.1392	28.7734
	13.998	36.138	37.2014	27.2094	28.8436
	14.03	36.2157	37.2809	27.2795	28.9138
	14.0621	36.2933	37.3602	27.3496	28.984
	14.0941	36.3708	37.4394	27.4196	29.054
	14.1261	36.4481	37.5185	27.4895	29.1239
	14.1582	36.5253	37.5974	27.5594	29.1937
	14.1902	36.6024	37.6762	27.6292	29.2634
	14.2222	36.6794	37.7548	27.6989	29.3331
	14.2543	36.7562	37.8333	27.7686	29.4026
	14.2863	36.8329	37.9116	27.8382	29.472
	14.3183	36.9095	37.9898	27.9077	29.5414
	14.3504	36.986	38.0679	27.9771	29.6106
	14.3824	37.0624	38.1458	28.0465	29.6798
	14.4144	37.1386	38.2236	28.1158	29.7488
	14.4464	37.2147	38.3012	28.1851	29.8178
	14.4785	37.2907	38.3787	28.2542	29.8866
	14.5105	37.3665	38.456	28.3233	29.9554
	14.5425	37.4423	38.5332	28.3924	30.024
	14.5746	37.5179	38.6102	28.4613	30.0926
	14.6066	37.5933	38.6871	28.5302	30.161
	14.6386	37.6687	38.7638	28.599	30.2294
	14.6707	37.7439	38.8404	28.6677	30.2976
	14.7027	37.819	38.9169	28.7364	30.3658
	14.7347	37.8939	38.9932	28.805	30.4338
	14.7668	37.9688	39.0693	28.8735	30.5018
	14.7988	38.0435	39.1453	28.9419	30.5696
	14.8308	38.118	39.2212	29.0102	30.6373
	14.8629	38.1925	39.2969	29.0785	30.7049
	14.8949	38.2668	39.3724	29.1467	30.7725
	14.9269	38.3409	39.4478	29.2148	30.8399
	14.959	38.415	39.5231	29.2829	30.9072
	14.991	38.4889	39.5982	29.3508	30.9744
	15.023	38.5627	39.6731	29.4187	31.0415
	15.0551	38.6364	39.7479	29.4865	31.1085
	15.0871	38.7099	39.8226	29.5542	31.1754
	15.1191	38.7833	39.8971	29.6218	31.2421
	15.1512	38.8565	39.9714	29.6894	31.3088
	15.1832	38.9297	40.0456	29.7569	31.3754
	15.2152	39.0026	40.1197	29.8243	31.4418
	15.2472	39.0755	40.1936	29.8916	31.5081
	15.2793	39.1482	40.2673	29.9588	31.5744
	15.3113	39.2208	40.3409	30.0259	31.6405
	15.3433	39.2933	40.4143	30.093	31.7065
	15.3754	39.3656	40.4876	30.1599	31.7724
	15.4074	39.4378	40.5607	30.2268	31.8382
	15.4394	39.5098	40.6337	30.2936	31.9039
	15.4715	39.5818	40.7065	30.3603	31.9695
	15.5035	39.6535	40.7792	30.427	32.0349
	15.5355	39.7252	40.8517	30.4935	32.1003
	15.5676	39.7967	40.924	30.5599	32.1655
	15.5996	39.8681	40.9962	30.6263	32.2306
	15.6316	39.9393	41.0683	30.6926	32.2956
	15.6637	40.0104	41.1402	30.7588	32.3605
	15.6957	40.0814	41.2119	30.8249	32.4253
	15.7277	40.1522	41.2835	30.8909	32.49
	15.7598	40.2229	41.3549	30.9568	32.5545
	15.7918	40.2935	41.4262	31.0226	32.619
	15.8238	40.3639	41.4973	31.0884	32.6833
	15.8559	40.4342	41.5682	31.154	32.7475
	15.8879	40.5043	41.6391	31.2196	32.8116
	15.9199	40.5743	41.7097	31.2851	32.8756
	15.952	40.6442	41.7802	31.3504	32.9394
	15.984	40.7139	41.8505	31.4157	33.0032
	16.016	40.7835	41.9207	31.4809	33.0668
	16.048	40.853	41.9907	31.546	33.1303
	16.0801	40.9223	42.0606	31.611	33.1937
	16.1121	40.9915	42.1303	31.676	33.257
	16.1441	41.0605	42.1999	31.7408	33.3202
	16.1762	41.1294	42.2692	31.8055	33.3832
	16.2082	41.1982	42.3385	31.8701	33.4461
	16.2402	41.2668	42.4076	31.9347	33.5089
	16.2723	41.3353	42.4765	31.9991	33.5716
	16.3043	41.4036	42.5453	32.0635	33.6342
	16.3363	41.4718	42.6139	32.1277	33.6967
	16.3684	41.5399	42.6823	32.1919	33.759
	16.4004	41.6078	42.7506	32.2559	33.8212
	16.4324	41.6756	42.8188	32.3199	33.8833
	16.4645	41.7432	42.8867	32.3838	33.9453
	16.4965	41.8107	42.9546	32.4475	34.0072
	16.5285	41.8781	43.0222	32.5112	34.0689
	16.5606	41.9453	43.0897	32.5748	34.1305
	16.5926	42.0124	43.1571	32.6383	34.192
	16.6246	42.0793	43.2243	32.7017	34.2534
	16.6567	42.1461	43.2913	32.7649	34.3147
	16.6887	42.2127	43.3582	32.8281	34.3758
	16.7207	42.2793	43.4249	32.8912	34.4369
	16.7528	42.3456	43.4915	32.9542	34.4978
	16.7848	42.4119	43.5579	33.0171	34.5585
	16.8168	42.4779	43.6241	33.0799	34.6192
	16.8488	42.5439	43.6902	33.1425	34.6797
	16.8809	42.6097	43.7561	33.2051	34.7401
	16.9129	42.6754	43.8219	33.2676	34.8004
	16.9449	42.7409	43.8875	33.33	34.8606
	16.977	42.8063	43.953	33.3923	34.9207
	17.009	42.8715	44.0183	33.4545	34.9806
	17.041	42.9366	44.0834	33.5166	35.0404
	17.0731	43.0016	44.1484	33.5785	35.1001
	17.1051	43.0664	44.2132	33.6404	35.1596
	17.1371	43.131	44.2779	33.7022	35.2191
	17.1692	43.1956	44.3424	33.7639	35.2784
	17.2012	43.26	44.4067	33.8254	35.3376
	17.2332	43.3242	44.4709	33.8869	35.3966
	17.2653	43.3883	44.535	33.9483	35.4556
	17.2973	43.4523	44.5988	34.0095	35.5144
	17.3293	43.5161	44.6626	34.0707	35.5731
	17.3614	43.5798	44.7261	34.1317	35.6317
	17.3934	43.6433	44.7895	34.1927	35.6901
	17.4254	43.7067	44.8528	34.2535	35.7485
	17.4575	43.7699	44.9159	34.3143	35.8067
	17.4895	43.833	44.9788	34.3749	35.8648
	17.5215	43.896	45.0416	34.4354	35.9227
	17.5536	43.9588	45.1042	34.4959	35.9805
	17.5856	44.0215	45.1666	34.5562	36.0383
	17.6176	44.084	45.2289	34.6164	36.0958
	17.6496	44.1464	45.2911	34.6765	36.1533
	17.6817	44.2087	45.3531	34.7365	36.2106
	17.7137	44.2708	45.4149	34.7964	36.2678
	17.7457	44.3328	45.4766	34.8562	36.3249
	17.7778	44.3946	45.5381	34.9159	36.3819
	17.8098	44.4563	45.5994	34.9755	36.4387
	17.8418	44.5178	45.6606	35.035	36.4955
	17.8739	44.5792	45.7217	35.0943	36.552
	17.9059	44.6405	45.7826	35.1536	36.6085
	17.9379	44.7016	45.8433	35.2128	36.6648
	17.97	44.7626	45.9039	35.2718	36.7211
	18.002	44.8234	45.9643	35.3307	36.7771
	18.034	44.8841	46.0246	35.3896	36.8331
	18.0661	44.9446	46.0847	35.4483	36.889
	18.0981	45.005	46.1446	35.5069	36.9447
	18.1301	45.0653	46.2044	35.5654	37.0003
	18.1622	45.1254	46.2641	35.6238	37.0557
	18.1942	45.1854	46.3235	35.6821	37.1111
	18.2262	45.2452	46.3829	35.7403	37.1663
	18.2583	45.3049	46.442	35.7984	37.2214
	18.2903	45.3644	46.501	35.8564	37.2763
	18.3223	45.4238	46.5599	35.9142	37.3312
	18.3544	45.4831	46.6186	35.972	37.3859
	18.3864	45.5422	46.6772	36.0296	37.4405
	18.4184	45.6012	46.7356	36.0872	37.4949
	18.4505	45.66	46.7938	36.1446	37.5493
	18.4825	45.7187	46.8519	36.2019	37.6035
	18.5145	45.7773	46.9098	36.2591	37.6576
	18.5465	45.8357	46.9676	36.3162	37.7115
	18.5786	45.894	47.0252	36.3732	37.7654
	18.6106	45.9521	47.0827	36.4301	37.8191
	18.6426	46.0101	47.14	36.4868	37.8727
	18.6747	46.068	47.1971	36.5435	37.9261
	18.7067	46.1257	47.2542	36.6001	37.9795
	18.7387	46.1832	47.311	36.6565	38.0327
	18.7708	46.2407	47.3677	36.7128	38.0858
	18.8028	46.298	47.4242	36.769	38.1387
	18.8348	46.3551	47.4806	36.8252	38.1916
	18.8669	46.4121	47.5369	36.8811	38.2443
	18.8989	46.469	47.593	36.937	38.2969
	18.9309	46.5257	47.6489	36.9928	38.3493
	18.963	46.5823	47.7047	37.0485	38.4017
	18.995	46.6387	47.7603	37.104	38.4539
	19.027	46.695	47.8158	37.1595	38.506
	19.0591	46.7512	47.8711	37.2148	38.5579
	19.0911	46.8072	47.9263	37.27	38.6098
	19.1231	46.8631	47.9813	37.3252	38.6615
	19.1552	46.9188	48.0362	37.3802	38.7131
	19.1872	46.9744	48.0909	37.4351	38.7645
	19.2192	47.0299	48.1455	37.4898	38.8159
	19.2513	47.0852	48.1999	37.5445	38.8671
	19.2833	47.1404	48.2541	37.5991	38.9182
	19.3153	47.1954	48.3082	37.6535	38.9691
	19.3473	47.2503	48.3622	37.7078	39.02
	19.3794	47.3051	48.416	37.7621	39.0707
	19.4114	47.3597	48.4697	37.8162	39.1213
	19.4434	47.4142	48.5232	37.8702	39.1717
	19.4755	47.4686	48.5766	37.9241	39.2221
	19.5075	47.5228	48.6298	37.9778	39.2723
	19.5395	47.5768	48.6828	38.0315	39.3224
	19.5716	47.6308	48.7358	38.0851	39.3723
	19.6036	47.6846	48.7885	38.1385	39.4222
	19.6356	47.7382	48.8411	38.1918	39.4719
	19.6677	47.7917	48.8936	38.2451	39.5215
	19.6997	47.8451	48.9459	38.2982	39.571
	19.7317	47.8984	48.9981	38.3512	39.6203
	19.7638	47.9515	49.0501	38.4041	39.6695
	19.7958	48.0044	49.102	38.4568	39.7186
	19.8278	48.0573	49.1537	38.5095	39.7676
	19.8599	48.11	49.2053	38.562	39.8165
	19.8919	48.1625	49.2568	38.6145	39.8652
	19.9239	48.215	49.308	38.6668	39.9138
	19.956	48.2672	49.3592	38.719	39.9623
	19.988	48.3194	49.4102	38.7711	40.0107
	20.02	48.3714	49.461	38.8231	40.0589
	20.0521	48.4233	49.5117	38.875	40.107
	20.0841	48.475	49.5623	38.9268	40.155
	20.1161	48.5266	49.6127	38.9784	40.2029
	20.1481	48.5781	49.663	39.03	40.2506
	20.1802	48.6294	49.7131	39.0814	40.2982
	20.2122	48.6806	49.7631	39.1327	40.3457
	20.2442	48.7317	49.8129	39.1839	40.3931
	20.2763	48.7826	49.8626	39.235	40.4404
	20.3083	48.8334	49.9121	39.286	40.4875
	20.3403	48.884	49.9615	39.3369	40.5345
	20.3724	48.9345	50.0108	39.3877	40.5814
	20.4044	48.9849	50.0599	39.4383	40.6282
	20.4364	49.0352	50.1088	39.4888	40.6748
	20.4685	49.0853	50.1577	39.5393	40.7214
	20.5005	49.1353	50.2063	39.5896	40.7678
	20.5325	49.1851	50.2549	39.6398	40.8141
	20.5646	49.2348	50.3033	39.6899	40.8602
	20.5966	49.2844	50.3515	39.7399	40.9063
	20.6286	49.3339	50.3996	39.7897	40.9522
	20.6607	49.3832	50.4476	39.8395	40.998
	20.6927	49.4324	50.4954	39.8891	41.0437
	20.7247	49.4814	50.5431	39.9387	41.0892
	20.7568	49.5303	50.5907	39.9881	41.1347
	20.7888	49.5791	50.6381	40.0374	41.18
	20.8208	49.6278	50.6853	40.0866	41.2252
	20.8529	49.6763	50.7325	40.1357	41.2703
	20.8849	49.7247	50.7795	40.1847	41.3152
	20.9169	49.7729	50.8263	40.2335	41.3601
	20.9489	49.8211	50.873	40.2823	41.4048
	20.981	49.8691	50.9196	40.3309	41.4494
	21.013	49.9169	50.966	40.3795	41.4939
	21.045	49.9647	51.0123	40.4279	41.5382
	21.0771	50.0123	51.0584	40.4762	41.5825
	21.1091	50.0597	51.1044	40.5244	41.6266
	21.1411	50.1071	51.1503	40.5725	41.6706
	21.1732	50.1543	51.196	40.6205	41.7145
	21.2052	50.2014	51.2416	40.6683	41.7583
	21.2372	50.2483	51.2871	40.7161	41.8019
	21.2693	50.2951	51.3324	40.7638	41.8454
	21.3013	50.3418	51.3776	40.8113	41.8888
	21.3333	50.3884	51.4227	40.8587	41.9321
	21.3654	50.4348	51.4676	40.906	41.9753
	21.3974	50.4811	51.5124	40.9532	42.0184
	21.4294	50.5273	51.557	41.0003	42.0613
	21.4615	50.5733	51.6015	41.0473	42.1042
	21.4935	50.6193	51.6459	41.0942	42.1469
	21.5255	50.6651	51.6901	41.141	42.1895
	21.5576	50.7107	51.7342	41.1876	42.2319
	21.5896	50.7563	51.7782	41.2342	42.2743
	21.6216	50.8017	51.822	41.2806	42.3165
	21.6537	50.8469	51.8657	41.3269	42.3587
	21.6857	50.8921	51.9093	41.3731	42.4007
	21.7177	50.9371	51.9527	41.4192	42.4426
	21.7497	50.982	51.996	41.4652	42.4843
	21.7818	51.0268	52.0392	41.5111	42.526
	21.8138	51.0715	52.0822	41.5569	42.5675
	21.8458	51.116	52.1251	41.6026	42.609
	21.8779	51.1604	52.1679	41.6481	42.6503
	21.9099	51.2046	52.2105	41.6936	42.6915
	21.9419	51.2488	52.253	41.7389	42.7326
	21.974	51.2928	52.2954	41.7842	42.7736
	22.006	51.3367	52.3377	41.8293	42.8144
	22.038	51.3805	52.3798	41.8743	42.8552
	22.0701	51.4241	52.4218	41.9192	42.8958
	22.1021	51.4676	52.4636	41.964	42.9363
	22.1341	51.511	52.5053	42.0087	42.9767
	22.1662	51.5543	52.5469	42.0533	43.017
	22.1982	51.5975	52.5884	42.0977	43.0572
	22.2302	51.6405	52.6297	42.1421	43.0972
	22.2623	51.6834	52.6709	42.1864	43.1372
	22.2943	51.7262	52.712	42.2305	43.177
	22.3263	51.7688	52.753	42.2745	43.2167
	22.3584	51.8114	52.7938	42.3185	43.2564
	22.3904	51.8538	52.8345	42.3623	43.2959
	22.4224	51.8961	52.875	42.406	43.3352
	22.4545	51.9383	52.9155	42.4496	43.3745
	22.4865	51.9803	52.9558	42.4931	43.4137
	22.5185	52.0222	52.996	42.5365	43.4527
	22.5506	52.064	53.0361	42.5798	43.4917
	22.5826	52.1057	53.076	42.623	43.5305
	22.6146	52.1473	53.1158	42.6661	43.5692
	22.6466	52.1887	53.1555	42.709	43.6078
	22.6787	52.2301	53.195	42.7519	43.6463
	22.7107	52.2713	53.2345	42.7947	43.6847
	22.7427	52.3124	53.2738	42.8373	43.723
	22.7748	52.3533	53.313	42.8798	43.7612
	22.8068	52.3942	53.352	42.9223	43.7992
	22.8388	52.4349	53.391	42.9646	43.8372
	22.8709	52.4755	53.4298	43.0068	43.875
	22.9029	52.516	53.4685	43.0489	43.9127
	22.9349	52.5564	53.507	43.091	43.9503
	22.967	52.5966	53.5455	43.1329	43.9878
	22.999	52.6368	53.5838	43.1747	44.0252
	23.031	52.6768	53.622	43.2164	44.0625
	23.0631	52.7167	53.6601	43.2579	44.0997
	23.0951	52.7565	53.698	43.2994	44.1368
	23.1271	52.7961	53.7359	43.3408	44.1738
	23.1592	52.8357	53.7736	43.3821	44.2106
	23.1912	52.8751	53.8112	43.4233	44.2474
	23.2232	52.9144	53.8487	43.4643	44.284
	23.2553	52.9536	53.886	43.5053	44.3206
	23.2873	52.9927	53.9233	43.5461	44.357
	23.3193	53.0317	53.9604	43.5869	44.3933
	23.3514	53.0705	53.9974	43.6275	44.4295
	23.3834	53.1093	54.0342	43.6681	44.4657
	23.4154	53.1479	54.071	43.7085	44.5017
	23.4474	53.1864	54.1076	43.7489	44.5376
	23.4795	53.2248	54.1442	43.7891	44.5734
	23.5115	53.2631	54.1806	43.8292	44.609
	23.5435	53.3012	54.2169	43.8693	44.6446
	23.5756	53.3393	54.253	43.9092	44.6801
	23.6076	53.3772	54.2891	43.949	44.7155
	23.6396	53.4151	54.325	43.9887	44.7508
	23.6717	53.4528	54.3608	44.0283	44.7859
	23.7037	53.4904	54.3965	44.0679	44.821
	23.7357	53.5279	54.4321	44.1073	44.8559
	23.7678	53.5653	54.4676	44.1466	44.8908
	23.7998	53.6025	54.503	44.1858	44.9255
	23.8318	53.6397	54.5382	44.2249	44.9602
	23.8639	53.6767	54.5733	44.2639	44.9947
	23.8959	53.7136	54.6083	44.3028	45.0292
	23.9279	53.7505	54.6432	44.3416	45.0635
	23.96	53.7872	54.678	44.3803	45.0977
	23.992	53.8238	54.7127	44.4189	45.1319
	24.024	53.8603	54.7473	44.4574	45.1659
	24.0561	53.8966	54.7817	44.4958	45.1998
	24.0881	53.9329	54.816	44.5341	45.2336
	24.1201	53.9691	54.8503	44.5723	45.2674
	24.1522	54.0051	54.8844	44.6104	45.301
	24.1842	54.041	54.9184	44.6484	45.3345
	24.2162	54.0769	54.9523	44.6862	45.3679
	24.2482	54.1126	54.986	44.724	45.4013
	24.2803	54.1482	55.0197	44.7617	45.4345
	24.3123	54.1837	55.0532	44.7993	45.4676
	24.3443	54.2191	55.0867	44.8368	45.5006
	24.3764	54.2544	55.12	44.8742	45.5335
	24.4084	54.2896	55.1532	44.9115	45.5664
	24.4404	54.3247	55.1864	44.9487	45.5991
	24.4725	54.3596	55.2194	44.9858	45.6317
	24.5045	54.3945	55.2522	45.0228	45.6642
	24.5365	54.4293	55.285	45.0597	45.6966
	24.5686	54.4639	55.3177	45.0965	45.729
	24.6006	54.4984	55.3503	45.1332	45.7612
	24.6326	54.5329	55.3827	45.1698	45.7933
	24.6647	54.5672	55.4151	45.2063	45.8254
	24.6967	54.6014	55.4473	45.2427	45.8573
	24.7287	54.6356	55.4795	45.279	45.8891
	24.7608	54.6696	55.5115	45.3152	45.9209
	24.7928	54.7035	55.5434	45.3514	45.9525
	24.8248	54.7373	55.5753	45.3874	45.984
	24.8569	54.771	55.607	45.4233	46.0155
	24.8889	54.8046	55.6386	45.4591	46.0468
	24.9209	54.8381	55.6701	45.4948	46.0781
	24.953	54.8715	55.7015	45.5305	46.1093
	24.985	54.9048	55.7328	45.566	46.1403
	25.017	54.938	55.764	45.6015	46.1713
	25.049	54.9711	55.7951	45.6368	46.2022
	25.0811	55.0041	55.826	45.672	46.2329
	25.1131	55.0369	55.8569	45.7072	46.2636
	25.1451	55.0697	55.8877	45.7422	46.2942
	25.1772	55.1024	55.9184	45.7772	46.3247
	25.2092	55.135	55.9489	45.8121	46.3551
	25.2412	55.1674	55.9794	45.8468	46.3854
	25.2733	55.1998	56.0098	45.8815	46.4156
	25.3053	55.2321	56.04	45.9161	46.4457
	25.3373	55.2643	56.0702	45.9506	46.4758
	25.3694	55.2963	56.1003	45.985	46.5057
	25.4014	55.3283	56.1302	46.0193	46.5355
	25.4334	55.3602	56.1601	46.0535	46.5653
	25.4655	55.392	56.1898	46.0876	46.5949
	25.4975	55.4236	56.2195	46.1216	46.6245
	25.5295	55.4552	56.249	46.1555	46.6539
	25.5616	55.4867	56.2785	46.1894	46.6833
	25.5936	55.5181	56.3079	46.2231	46.7126
	25.6256	55.5494	56.3371	46.2567	46.7418
	25.6577	55.5805	56.3663	46.2903	46.7709
	25.6897	55.6116	56.3953	46.3237	46.7999
	25.7217	55.6426	56.4243	46.3571	46.8288
	25.7538	55.6735	56.4532	46.3904	46.8577
	25.7858	55.7043	56.4819	46.4236	46.8864
	25.8178	55.735	56.5106	46.4566	46.9151
	25.8498	55.7656	56.5392	46.4896	46.9436
	25.8819	55.7961	56.5677	46.5225	46.9721
	25.9139	55.8265	56.596	46.5554	47.0005
	25.9459	55.8568	56.6243	46.5881	47.0288
	25.978	55.8871	56.6525	46.6207	47.057
	26.01	55.9172	56.6806	46.6532	47.0851
	26.042	55.9472	56.7086	46.6857	47.1131
	26.0741	55.9771	56.7365	46.718	47.141
	26.1061	56.007	56.7643	46.7503	47.1689
	26.1381	56.0367	56.792	46.7825	47.1966
	26.1702	56.0664	56.8196	46.8146	47.2243
	26.2022	56.0959	56.8471	46.8466	47.2519
	26.2342	56.1254	56.8746	46.8785	47.2794
	26.2663	56.1548	56.9019	46.9103	47.3068
	26.2983	56.184	56.9291	46.942	47.3341
	26.3303	56.2132	56.9563	46.9737	47.3614
	26.3624	56.2423	56.9833	47.0052	47.3885
	26.3944	56.2713	57.0103	47.0367	47.4156
	26.4264	56.3002	57.0372	47.0681	47.4425
	26.4585	56.329	57.0639	47.0993	47.4694
	26.4905	56.3578	57.0906	47.1305	47.4962
	26.5225	56.3864	57.1172	47.1616	47.523
	26.5546	56.4149	57.1437	47.1927	47.5496
	26.5866	56.4434	57.1701	47.2236	47.5762
	26.6186	56.4717	57.1965	47.2544	47.6026
	26.6507	56.5	57.2227	47.2852	47.629
	26.6827	56.5282	57.2488	47.3159	47.6553
	26.7147	56.5563	57.2749	47.3465	47.6815
	26.7467	56.5843	57.3008	47.377	47.7076
	26.7788	56.6122	57.3267	47.4074	47.7337
	26.8108	56.64	57.3525	47.4377	47.7597
	26.8428	56.6677	57.3782	47.4679	47.7855
	26.8749	56.6954	57.4038	47.4981	47.8113
	26.9069	56.7229	57.4293	47.5281	47.837
	26.9389	56.7504	57.4547	47.5581	47.8627
	26.971	56.7778	57.4801	47.588	47.8882
	27.003	56.8051	57.5053	47.6178	47.9137
	27.035	56.8323	57.5305	47.6475	47.9391
	27.0671	56.8594	57.5556	47.6772	47.9644
	27.0991	56.8864	57.5805	47.7067	47.9896
	27.1311	56.9133	57.6055	47.7362	48.0147
	27.1632	56.9402	57.6303	47.7656	48.0398
	27.1952	56.967	57.655	47.7949	48.0648
	27.2272	56.9936	57.6796	47.8241	48.0897
	27.2593	57.0202	57.7042	47.8532	48.1145
	27.2913	57.0467	57.7287	47.8823	48.1392
	27.3233	57.0732	57.7531	47.9112	48.1639
	27.3554	57.0995	57.7774	47.9401	48.1885
	27.3874	57.1257	57.8016	47.9689	48.213
	27.4194	57.1519	57.8257	47.9976	48.2374
	27.4515	57.178	57.8498	48.0262	48.2617
	27.4835	57.204	57.8738	48.0548	48.286
	27.5155	57.2299	57.8976	48.0833	48.3102
	27.5475	57.2557	57.9214	48.1116	48.3343
	27.5796	57.2815	57.9452	48.1399	48.3583
	27.6116	57.3071	57.9688	48.1682	48.3822
	27.6436	57.3327	57.9923	48.1963	48.4061
	27.6757	57.3582	58.0158	48.2243	48.4299
	27.7077	57.3836	58.0392	48.2523	48.4536
	27.7397	57.409	58.0625	48.2802	48.4772
	27.7718	57.4342	58.0857	48.308	48.5008
	27.8038	57.4594	58.1089	48.3357	48.5243
	27.8358	57.4845	58.132	48.3634	48.5477
	27.8679	57.5095	58.1549	48.391	48.571
	27.8999	57.5344	58.1778	48.4185	48.5943
	27.9319	57.5592	58.2007	48.4459	48.6174
	27.964	57.584	58.2234	48.4732	48.6405
	27.996	57.6087	58.2461	48.5004	48.6636
	28.028	57.6333	58.2686	48.5276	48.6865
	28.0601	57.6578	58.2912	48.5547	48.7094
	28.0921	57.6822	58.3136	48.5817	48.7322
	28.1241	57.7066	58.3359	48.6086	48.7549
	28.1562	57.7308	58.3582	48.6355	48.7776
	28.1882	57.755	58.3804	48.6622	48.8001
	28.2202	57.7792	58.4025	48.6889	48.8226
	28.2523	57.8032	58.4245	48.7156	48.8451
	28.2843	57.8272	58.4465	48.7421	48.8674
	28.3163	57.851	58.4684	48.7686	48.8897
	28.3483	57.8749	58.4902	48.7949	48.9119
	28.3804	57.8986	58.5119	48.8212	48.934
	28.4124	57.9222	58.5335	48.8475	48.9561
	28.4444	57.9458	58.5551	48.8736	48.9781
	28.4765	57.9693	58.5766	48.8997	49
	28.5085	57.9927	58.598	48.9257	49.0218
	28.5405	58.016	58.6194	48.9516	49.0436
	28.5726	58.0393	58.6406	48.9774	49.0653
	28.6046	58.0625	58.6618	49.0032	49.0869
	28.6366	58.0856	58.6829	49.0289	49.1085
	28.6687	58.1086	58.704	49.0545	49.13
	28.7007	58.1316	58.725	49.08	49.1514
	28.7327	58.1545	58.7458	49.1055	49.1727
	28.7648	58.1773	58.7667	49.1309	49.194
	28.7968	58.2	58.7874	49.1562	49.2152
	28.8288	58.2227	58.8081	49.1814	49.2363
	28.8609	58.2453	58.8287	49.2066	49.2574
	28.8929	58.2678	58.8492	49.2317	49.2784
	28.9249	58.2902	58.8697	49.2567	49.2993
	28.957	58.3125	58.8901	49.2816	49.3202
	28.989	58.3348	58.9104	49.3065	49.3409
	29.021	58.357	58.9306	49.3312	49.3616
	29.0531	58.3792	58.9508	49.356	49.3823
	29.0851	58.4012	58.9709	49.3806	49.4029
	29.1171	58.4232	58.9909	49.4052	49.4234
	29.1491	58.4451	59.0108	49.4297	49.4438
	29.1812	58.467	59.0307	49.4541	49.4642
	29.2132	58.4888	59.0505	49.4784	49.4845
	29.2452	58.5105	59.0703	49.5027	49.5047
	29.2773	58.5321	59.0899	49.5269	49.5249
	29.3093	58.5536	59.1095	49.551	49.545
	29.3413	58.5751	59.1291	49.5751	49.565
	29.3734	58.5965	59.1485	49.5991	49.585
	29.4054	58.6179	59.1679	49.623	49.6049
	29.4374	58.6392	59.1872	49.6468	49.6247
	29.4695	58.6604	59.2065	49.6706	49.6445
	29.5015	58.6815	59.2257	49.6943	49.6642
	29.5335	58.7025	59.2448	49.7179	49.6838
	29.5656	58.7235	59.2638	49.7414	49.7034
	29.5976	58.7444	59.2828	49.7649	49.7229
	29.6296	58.7653	59.3017	49.7883	49.7423
	29.6617	58.7861	59.3205	49.8117	49.7617
	29.6937	58.8068	59.3393	49.8349	49.781
	29.7257	58.8274	59.358	49.8581	49.8002
	29.7578	58.848	59.3767	49.8813	49.8194
	29.7898	58.8685	59.3952	49.9043	49.8385
	29.8218	58.8889	59.4137	49.9273	49.8576
	29.8539	58.9093	59.4322	49.9502	49.8765
	29.8859	58.9296	59.4506	49.9731	49.8955
	29.9179	58.9498	59.4689	49.9959	49.9143
	29.9499	58.97	59.4871	50.0186	49.9331
	29.982	58.9901	59.5053	50.0412	49.9518
	30.014	59.0101	59.5234	50.0638	49.9705
	30.046	59.0301	59.5414	50.0863	49.9891
	30.0781	59.05	59.5594	50.1087	50.0076
	30.1101	59.0698	59.5773	50.1311	50.0261
	30.1421	59.0895	59.5952	50.1534	50.0445
	30.1742	59.1092	59.613	50.1757	50.0629
	30.2062	59.1289	59.6307	50.1978	50.0812
	30.2382	59.1484	59.6484	50.2199	50.0994
	30.2703	59.1679	59.666	50.242	50.1176
	30.3023	59.1873	59.6835	50.2639	50.1357
	30.3343	59.2067	59.701	50.2858	50.1537
	30.3664	59.226	59.7184	50.3076	50.1717
	30.3984	59.2452	59.7357	50.3294	50.1896
	30.4304	59.2644	59.753	50.3511	50.2075
	30.4625	59.2835	59.7702	50.3727	50.2253
	30.4945	59.3026	59.7874	50.3943	50.243
	30.5265	59.3215	59.8045	50.4158	50.2607
	30.5586	59.3405	59.8215	50.4372	50.2783
	30.5906	59.3593	59.8385	50.4586	50.2959
	30.6226	59.3781	59.8554	50.4799	50.3134
	30.6547	59.3968	59.8722	50.5011	50.3308
	30.6867	59.4155	59.889	50.5223	50.3482
	30.7187	59.4341	59.9057	50.5434	50.3655
	30.7508	59.4526	59.9224	50.5645	50.3828
	30.7828	59.4711	59.939	50.5854	50.4
	30.8148	59.4895	59.9556	50.6064	50.4171
	30.8468	59.5078	59.9721	50.6272	50.4342
	30.8789	59.5261	59.9885	50.648	50.4513
	30.9109	59.5443	60.0048	50.6687	50.4682
	30.9429	59.5625	60.0212	50.6894	50.4852
	30.975	59.5806	60.0374	50.71	50.502
	31.007	59.5986	60.0536	50.7305	50.5188
	31.039	59.6166	60.0697	50.751	50.5355
	31.0711	59.6345	60.0858	50.7714	50.5522
	31.1031	59.6524	60.1018	50.7917	50.5689
	31.1351	59.6701	60.1178	50.812	50.5854
	31.1672	59.6879	60.1337	50.8322	50.6019
	31.1992	59.7056	60.1495	50.8524	50.6184
	31.2312	59.7232	60.1653	50.8724	50.6348
	31.2633	59.7407	60.181	50.8925	50.6511
	31.2953	59.7582	60.1967	50.9124	50.6674
	31.3273	59.7756	60.2123	50.9323	50.6837
	31.3594	59.793	60.2279	50.9522	50.6998
	31.3914	59.8103	60.2434	50.972	50.716
	31.4234	59.8276	60.2588	50.9917	50.732
	31.4555	59.8448	60.2742	51.0114	50.748
	31.4875	59.8619	60.2895	51.031	50.764
	31.5195	59.879	60.3048	51.0505	50.7799
	31.5516	59.896	60.32	51.07	50.7957
	31.5836	59.913	60.3352	51.0894	50.8115
	31.6156	59.9299	60.3503	51.1087	50.8273
	31.6476	59.9468	60.3653	51.128	50.8429
	31.6797	59.9635	60.3803	51.1473	50.8586
	31.7117	59.9803	60.3953	51.1665	50.8742
	31.7437	59.997	60.4102	51.1856	50.8897
	31.7758	60.0136	60.425	51.2046	50.9051
	31.8078	60.0301	60.4398	51.2236	50.9206
	31.8398	60.0466	60.4545	51.2426	50.9359
	31.8719	60.0631	60.4692	51.2614	50.9512
	31.9039	60.0795	60.4838	51.2803	50.9665
	31.9359	60.0958	60.4984	51.299	50.9817
	31.968	60.1121	60.5129	51.3177	50.9968
	32	60.1283	60.5273	51.3364	51.0119
Fig. 9B	date
		WT			Slmapk3			Slwrky73 SlWRKY73S178D			SlCYP76B23-OE			Slmapk3 Slwrky73SlWRKY73S178D			Slmapk3 SlCYP76B23-OE
	8 h	34.2857	40	37.8378	22.2222	25.7143	26.3158	53.3333	51.4286	59.4595	52.9412	51.5152	48.5714	30	28.5714	26.4706	27.2727	29.0323	25
	16 h	51.4286	63.3333	59.4595	36.1111	40	36.8421	80	74.2857	72.973	73.5294	72.7273	68.5714	43.3333	40	47.0588	36.3636	41.9355	43.75
	24 h	91.4286	93.3333	97.2973	50	48.5714	47.3684	100	100	100	100	96.9697	100	56.6667	57.1429	52.9412	54.5455	54.8387	59.375
	32 h	100	100	100	61.1111	60	57.8947	100	100	100	100	100	100	70	68.5714	64.7059	66.6667	67.7419	71.875
	Table Analyzed
	Two-way ANOVA	Ordinary
	Alpha	0.05
	Source of Variation	% of total variation	P value	P value summary	Significant?
	Interaction	3.939	<0.0001	****	Yes
	Row Factor	51.87	<0.0001	****	Yes
	Column Factor	43.4	<0.0001	****	Yes
	ANOVA table	SS	DF	MS	F (DFn, DFd)	P value
	Interaction	1752	15	116.8	F (15, 48) = 15.87	P<0.0001
	Row Factor	23068	3	7689	F (3, 48) = 1045	P<0.0001
	Column Factor	19298	5	3860	F (5, 48) = 524.5	P<0.0001
	Residual	353.2	48	7.359
	Data summary
	Number of columns (Column Factor)	6
	Number of rows (Row Factor)	4
	Number of values	72
	Within each row, compare columns (simple effects within rows)
	Number of families	4
	Number of comparisons per family	15
	Alpha	0.05
	Tukey's multiple comparisons test	Mean Diff.	95.00% CI of diff.	Significant?	Summary	Adjusted P Value
	8
	WT vs. Slmapk3	12.62	6.050 to 19.20	Yes	****	<0.0001
	WT vs. Slwrky73 SlWRKY73S178D	-17.37	-23.94 to -10.79	Yes	****	<0.0001
	WT vs. SlCYP76B23-OE	-13.63	-20.21 to -7.061	Yes	****	<0.0001
	WT vs. Slmapk3 Slwrky73SlWRKY73S178D	9.027	2.454 to 15.60	Yes	**	0.0022
	WT vs. Slmapk3 SlCYP76B23-OE	10.27	3.699 to 16.85	Yes	***	0.0004
	Slmapk3 vs. Slwrky73 SlWRKY73S178D	-29.99	-36.56 to -23.42	Yes	****	<0.0001
	Slmapk3 vs. SlCYP76B23-OE	-26.26	-32.83 to -19.68	Yes	****	<0.0001
	Slmapk3 vs. Slmapk3 Slwrky73SlWRKY73S178D	-3.597	-10.17 to 2.977	No	ns	0.5873
	Slmapk3 vs. Slmapk3 SlCYP76B23-OE	-2.351	-8.925 to 4.223	No	ns	0.894
	Slwrky73 SlWRKY73S178D vs. SlCYP76B23-OE	3.731	-2.842 to 10.30	No	ns	0.5484
	Slwrky73 SlWRKY73S178D vs. Slmapk3 Slwrky73SlWRKY73S178D	26.39	19.82 to 32.97	Yes	****	<0.0001
	Slwrky73 SlWRKY73S178D vs. Slmapk3 SlCYP76B23-OE	27.64	21.07 to 34.21	Yes	****	<0.0001
	SlCYP76B23-OE vs. Slmapk3 Slwrky73SlWRKY73S178D	22.66	16.09 to 29.24	Yes	****	<0.0001
	SlCYP76B23-OE vs. Slmapk3 SlCYP76B23-OE	23.91	17.33 to 30.48	Yes	****	<0.0001
	Slmapk3 Slwrky73SlWRKY73S178D vs. Slmapk3 SlCYP76B23-OE	1.246	-5.328 to 7.819	No	ns	0.993
	16
	WT vs. Slmapk3	20.42	13.85 to 27.00	Yes	****	<0.0001
	WT vs. Slwrky73 SlWRKY73S178D	-17.68	-24.25 to -11.11	Yes	****	<0.0001
	WT vs. SlCYP76B23-OE	-13.54	-20.11 to -6.962	Yes	****	<0.0001
	WT vs. Slmapk3 Slwrky73SlWRKY73S178D	14.61	8.036 to 21.18	Yes	****	<0.0001
	WT vs. Slmapk3 SlCYP76B23-OE	17.39	10.82 to 23.96	Yes	****	<0.0001
	Slmapk3 vs. Slwrky73 SlWRKY73S178D	-38.1	-44.68 to -31.53	Yes	****	<0.0001
	Slmapk3 vs. SlCYP76B23-OE	-33.96	-40.53 to -27.38	Yes	****	<0.0001
	Slmapk3 vs. Slmapk3 Slwrky73SlWRKY73S178D	-5.813	-12.39 to 0.7606	No	ns	0.111
	Slmapk3 vs. Slmapk3 SlCYP76B23-OE	-3.032	-9.606 to 3.542	No	ns	0.745
	Slwrky73 SlWRKY73S178D vs. SlCYP76B23-OE	4.144	-2.430 to 10.72	No	ns	0.4321
	Slwrky73 SlWRKY73S178D vs. Slmapk3 Slwrky73SlWRKY73S178D	32.29	25.72 to 38.86	Yes	****	<0.0001
	Slwrky73 SlWRKY73S178D vs. Slmapk3 SlCYP76B23-OE	35.07	28.50 to 41.64	Yes	****	<0.0001
	SlCYP76B23-OE vs. Slmapk3 Slwrky73SlWRKY73S178D	28.15	21.57 to 34.72	Yes	****	<0.0001
	SlCYP76B23-OE vs. Slmapk3 SlCYP76B23-OE	30.93	24.35 to 37.50	Yes	****	<0.0001
	Slmapk3 Slwrky73SlWRKY73S178D vs. Slmapk3 SlCYP76B23-OE	2.781	-3.793 to 9.355	No	ns	0.807
	24
	WT vs. Slmapk3	45.37	38.80 to 51.95	Yes	****	<0.0001
	WT vs. Slwrky73 SlWRKY73S178D	-5.98	-12.55 to 0.5933	No	ns	0.0939
	WT vs. SlCYP76B23-OE	-4.97	-11.54 to 1.603	No	ns	0.2374
	WT vs. Slmapk3 Slwrky73SlWRKY73S178D	38.44	31.86 to 45.01	Yes	****	<0.0001
	WT vs. Slmapk3 SlCYP76B23-OE	37.77	31.19 to 44.34	Yes	****	<0.0001
	Slmapk3 vs. Slwrky73 SlWRKY73S178D	-51.35	-57.93 to -44.78	Yes	****	<0.0001
	Slmapk3 vs. SlCYP76B23-OE	-50.34	-56.92 to -43.77	Yes	****	<0.0001
	Slmapk3 vs. Slmapk3 Slwrky73SlWRKY73S178D	-6.937	-13.51 to -0.3633	Yes	*	0.0331
	Slmapk3 vs. Slmapk3 SlCYP76B23-OE	-7.606	-14.18 to -1.033	Yes	*	0.0147
	Slwrky73 SlWRKY73S178D vs. SlCYP76B23-OE	1.01	-5.564 to 7.584	No	ns	0.9974
	Slwrky73 SlWRKY73S178D vs. Slmapk3 Slwrky73SlWRKY73S178D	44.42	37.84 to 50.99	Yes	****	<0.0001
	Slwrky73 SlWRKY73S178D vs. Slmapk3 SlCYP76B23-OE	43.75	37.17 to 50.32	Yes	****	<0.0001
	SlCYP76B23-OE vs. Slmapk3 Slwrky73SlWRKY73S178D	43.41	36.83 to 49.98	Yes	****	<0.0001
	SlCYP76B23-OE vs. Slmapk3 SlCYP76B23-OE	42.74	36.16 to 49.31	Yes	****	<0.0001
	Slmapk3 Slwrky73SlWRKY73S178D vs. Slmapk3 SlCYP76B23-OE	-0.6695	-7.243 to 5.904	No	ns	0.9996
	32
	WT vs. Slmapk3	40.33	33.76 to 46.90	Yes	****	<0.0001
	WT vs. Slwrky73 SlWRKY73S178D	0	-6.574 to 6.574	No	ns	>0.9999
	WT vs. SlCYP76B23-OE	0	-6.574 to 6.574	No	ns	>0.9999
	WT vs. Slmapk3 Slwrky73SlWRKY73S178D	32.24	25.67 to 38.81	Yes	****	<0.0001
	WT vs. Slmapk3 SlCYP76B23-OE	31.24	24.67 to 37.81	Yes	****	<0.0001
	Slmapk3 vs. Slwrky73 SlWRKY73S178D	-40.33	-46.90 to -33.76	Yes	****	<0.0001
	Slmapk3 vs. SlCYP76B23-OE	-40.33	-46.90 to -33.76	Yes	****	<0.0001
	Slmapk3 vs. Slmapk3 Slwrky73SlWRKY73S178D	-8.09	-14.66 to -1.517	Yes	**	0.0079
	Slmapk3 vs. Slmapk3 SlCYP76B23-OE	-9.093	-15.67 to -2.519	Yes	**	0.0021
	Slwrky73 SlWRKY73S178D vs. SlCYP76B23-OE	0	-6.574 to 6.574	No	ns	>0.9999
	Slwrky73 SlWRKY73S178D vs. Slmapk3 Slwrky73SlWRKY73S178D	32.24	25.67 to 38.81	Yes	****	<0.0001
	Slwrky73 SlWRKY73S178D vs. Slmapk3 SlCYP76B23-OE	31.24	24.67 to 37.81	Yes	****	<0.0001
	SlCYP76B23-OE vs. Slmapk3 Slwrky73SlWRKY73S178D	32.24	25.67 to 38.81	Yes	****	<0.0001
	SlCYP76B23-OE vs. Slmapk3 SlCYP76B23-OE	31.24	24.67 to 37.81	Yes	****	<0.0001
	Slmapk3 Slwrky73SlWRKY73S178D vs. Slmapk3 SlCYP76B23-OE	-1.002	-7.576 to 5.572	No	ns	0.9975
	Test details	Mean 1	Mean 2	Mean Diff.	SE of diff.	N1	N2	q	DF
	8
	WT vs. Slmapk3	37.37	24.75	12.62	2.215	3	3	8.06	48
	WT vs. Slwrky73 SlWRKY73S178D	37.37	54.74	-17.37	2.215	3	3	11.09	48
	WT vs. SlCYP76B23-OE	37.37	51.01	-13.63	2.215	3	3	8.706	48
	WT vs. Slmapk3 Slwrky73SlWRKY73S178D	37.37	28.35	9.027	2.215	3	3	5.764	48
	WT vs. Slmapk3 SlCYP76B23-OE	37.37	27.1	10.27	2.215	3	3	6.559	48
	Slmapk3 vs. Slwrky73 SlWRKY73S178D	24.75	54.74	-29.99	2.215	3	3	19.15	48
	Slmapk3 vs. SlCYP76B23-OE	24.75	51.01	-26.26	2.215	3	3	16.77	48
	Slmapk3 vs. Slmapk3 Slwrky73SlWRKY73S178D	24.75	28.35	-3.597	2.215	3	3	2.296	48
	Slmapk3 vs. Slmapk3 SlCYP76B23-OE	24.75	27.1	-2.351	2.215	3	3	1.501	48
	Slwrky73 SlWRKY73S178D vs. SlCYP76B23-OE	54.74	51.01	3.731	2.215	3	3	2.382	48
	Slwrky73 SlWRKY73S178D vs. Slmapk3 Slwrky73SlWRKY73S178D	54.74	28.35	26.39	2.215	3	3	16.85	48
	Slwrky73 SlWRKY73S178D vs. Slmapk3 SlCYP76B23-OE	54.74	27.1	27.64	2.215	3	3	17.65	48
	SlCYP76B23-OE vs. Slmapk3 Slwrky73SlWRKY73S178D	51.01	28.35	22.66	2.215	3	3	14.47	48
	SlCYP76B23-OE vs. Slmapk3 SlCYP76B23-OE	51.01	27.1	23.91	2.215	3	3	15.26	48
	Slmapk3 Slwrky73SlWRKY73S178D vs. Slmapk3 SlCYP76B23-OE	28.35	27.1	1.246	2.215	3	3	0.7954	48
	16
	WT vs. Slmapk3	58.07	37.65	20.42	2.215	3	3	13.04	48
	WT vs. Slwrky73 SlWRKY73S178D	58.07	75.75	-17.68	2.215	3	3	11.29	48
	WT vs. SlCYP76B23-OE	58.07	71.61	-13.54	2.215	3	3	8.642	48
	WT vs. Slmapk3 Slwrky73SlWRKY73S178D	58.07	43.46	14.61	2.215	3	3	9.328	48
	WT vs. Slmapk3 SlCYP76B23-OE	58.07	40.68	17.39	2.215	3	3	11.1	48
	Slmapk3 vs. Slwrky73 SlWRKY73S178D	37.65	75.75	-38.1	2.215	3	3	24.33	48
	Slmapk3 vs. SlCYP76B23-OE	37.65	71.61	-33.96	2.215	3	3	21.68	48
	Slmapk3 vs. Slmapk3 Slwrky73SlWRKY73S178D	37.65	43.46	-5.813	2.215	3	3	3.712	48
	Slmapk3 vs. Slmapk3 SlCYP76B23-OE	37.65	40.68	-3.032	2.215	3	3	1.936	48
	Slwrky73 SlWRKY73S178D vs. SlCYP76B23-OE	75.75	71.61	4.144	2.215	3	3	2.646	48
	Slwrky73 SlWRKY73S178D vs. Slmapk3 Slwrky73SlWRKY73S178D	75.75	43.46	32.29	2.215	3	3	20.62	48
	Slwrky73 SlWRKY73S178D vs. Slmapk3 SlCYP76B23-OE	75.75	40.68	35.07	2.215	3	3	22.39	48
	SlCYP76B23-OE vs. Slmapk3 Slwrky73SlWRKY73S178D	71.61	43.46	28.15	2.215	3	3	17.97	48
	SlCYP76B23-OE vs. Slmapk3 SlCYP76B23-OE	71.61	40.68	30.93	2.215	3	3	19.75	48
	Slmapk3 Slwrky73SlWRKY73S178D vs. Slmapk3 SlCYP76B23-OE	43.46	40.68	2.781	2.215	3	3	1.776	48
	24
	WT vs. Slmapk3	94.02	48.65	45.37	2.215	3	3	28.97	48
	WT vs. Slwrky73 SlWRKY73S178D	94.02	100	-5.98	2.215	3	3	3.818	48
	WT vs. SlCYP76B23-OE	94.02	98.99	-4.97	2.215	3	3	3.173	48
	WT vs. Slmapk3 Slwrky73SlWRKY73S178D	94.02	55.58	38.44	2.215	3	3	24.54	48
	WT vs. Slmapk3 SlCYP76B23-OE	94.02	56.25	37.77	2.215	3	3	24.11	48
	Slmapk3 vs. Slwrky73 SlWRKY73S178D	48.65	100	-51.35	2.215	3	3	32.79	48
	Slmapk3 vs. SlCYP76B23-OE	48.65	98.99	-50.34	2.215	3	3	32.14	48
	Slmapk3 vs. Slmapk3 Slwrky73SlWRKY73S178D	48.65	55.58	-6.937	2.215	3	3	4.429	48
	Slmapk3 vs. Slmapk3 SlCYP76B23-OE	48.65	56.25	-7.606	2.215	3	3	4.857	48
	Slwrky73 SlWRKY73S178D vs. SlCYP76B23-OE	100	98.99	1.01	2.215	3	3	0.6449	48
	Slwrky73 SlWRKY73S178D vs. Slmapk3 Slwrky73SlWRKY73S178D	100	55.58	44.42	2.215	3	3	28.36	48
	Slwrky73 SlWRKY73S178D vs. Slmapk3 SlCYP76B23-OE	100	56.25	43.75	2.215	3	3	27.93	48
	SlCYP76B23-OE vs. Slmapk3 Slwrky73SlWRKY73S178D	98.99	55.58	43.41	2.215	3	3	27.71	48
	SlCYP76B23-OE vs. Slmapk3 SlCYP76B23-OE	98.99	56.25	42.74	2.215	3	3	27.29	48
	Slmapk3 Slwrky73SlWRKY73S178D vs. Slmapk3 SlCYP76B23-OE	55.58	56.25	-0.6695	2.215	3	3	0.4275	48
	32
	WT vs. Slmapk3	100	59.67	40.33	2.215	3	3	25.75	48
	WT vs. Slwrky73 SlWRKY73S178D	100	100	0	2.215	3	3	0	48
	WT vs. SlCYP76B23-OE	100	100	0	2.215	3	3	0	48
	WT vs. Slmapk3 Slwrky73SlWRKY73S178D	100	67.76	32.24	2.215	3	3	20.59	48
	WT vs. Slmapk3 SlCYP76B23-OE	100	68.76	31.24	2.215	3	3	19.95	48
	Slmapk3 vs. Slwrky73 SlWRKY73S178D	59.67	100	-40.33	2.215	3	3	25.75	48
	Slmapk3 vs. SlCYP76B23-OE	59.67	100	-40.33	2.215	3	3	25.75	48
	Slmapk3 vs. Slmapk3 Slwrky73SlWRKY73S178D	59.67	67.76	-8.09	2.215	3	3	5.166	48
	Slmapk3 vs. Slmapk3 SlCYP76B23-OE	59.67	68.76	-9.093	2.215	3	3	5.806	48
	Slwrky73 SlWRKY73S178D vs. SlCYP76B23-OE	100	100	0	2.215	3	3	0	48
	Slwrky73 SlWRKY73S178D vs. Slmapk3 Slwrky73SlWRKY73S178D	100	67.76	32.24	2.215	3	3	20.59	48
	Slwrky73 SlWRKY73S178D vs. Slmapk3 SlCYP76B23-OE	100	68.76	31.24	2.215	3	3	19.95	48
	SlCYP76B23-OE vs. Slmapk3 Slwrky73SlWRKY73S178D	100	67.76	32.24	2.215	3	3	20.59	48
	SlCYP76B23-OE vs. Slmapk3 SlCYP76B23-OE	100	68.76	31.24	2.215	3	3	19.95	48
	Slmapk3 Slwrky73SlWRKY73S178D vs. Slmapk3 SlCYP76B23-OE	67.76	68.76	-1.002	2.215	3	3	0.6398	48
Fig. 9D	date
		Slmapk3Slwrky73SlWRKY73S178D pH 7			Slmapk3Slwrky73SlWRKY73S178D pH10			Slmapk3 SlCYP76B23-OE pH7			Slmapk3 SlCYP76B23-OE pH10
	0 h	0	0	0	0	0	0	0	0	0	0	0	0
	8 h	28.125	26.4706	23.6842	46.6667	51.4286	55.8824	23.5294	31.4286	26.6667	51.5151	54.8387	53.125
	16 h	40.625	47.0588	42.1053	73.3333	68.5714	76.4706	44.1176	40	36.6667	75.7576	77.4193	71.875
	24 h	53.125	58.8235	52.6316	96.6667	100	100	55.8824	57.1429	53.3333	100	100	100
	32 h	65.625	70.5882	63.1579	100	100	100	64.7059	68.5714	70	100	100	100
	Gompertz growth
	Best-fit values
	YM	68.48	101.4	73.62	100.9
	Y0	4.085	5.848	5.099	5.531
	K	0.1169	0.158	0.0991	0.1691
	1/K	8.553	6.327	10.09	5.914
	95% CI (profile likelihood)
	YM	60.69 to 81.98	93.27 to 112.1	62.59 to 98.21	93.76 to 109.7
	Y0	1.111 to 8.069	1.105 to 12.28	1.591 to 9.647	1.030 to 11.54
	K	0.07958 to 0.1675	0.1144 to 0.2254	0.06140 to 0.1480	0.1257 to 0.2365
	1/K	5.971 to 12.57	4.436 to 8.740	6.755 to 16.29	4.228 to 7.953
	Goodness of Fit
	Degrees of Freedom	12	12	12	12
	R squared	0.9736	0.9744	0.9662	0.9783
	Sum of Squares	216.8	527.5	281.9	450.7
	Sy.x	4.251	6.63	4.846	6.128
	Constraints
	Y0	Y0 > 0	Y0 > 0	Y0 > 0	Y0 > 0
	K	K > 0	K > 0	K > 0	K > 0
	Number of points
	# of X values	15	15	15	15
	# Y values analyzed	15	15	15	15
	Table Analyzed
	Two-way ANOVA	Ordinary
	Alpha	0.05
	Source of Variation	% of total variation	P value	P value summary	Significant?
	Interaction	4.789	<0.0001	****	Yes
	Row Factor	78.95	<0.0001	****	Yes
	Column Factor	15.87	<0.0001	****	Yes
	ANOVA table	SS	DF	MS	F (DFn, DFd)	P value
	Interaction	3298	12	274.8	F (12, 40) = 40.65	P<0.0001
	Row Factor	54368	4	13592	F (4, 40) = 2011	P<0.0001
	Column Factor	10929	3	3643	F (3, 40) = 538.9	P<0.0001
	Residual	270.4	40	6.76
	Data summary
	Number of columns (Column Factor)	4
	Number of rows (Row Factor)	5
	Number of values	60
	Within each row, compare columns (simple effects within rows)
	Number of families	5
	Number of comparisons per family	6
	Alpha	0.05
	Tukey's multiple comparisons test	Mean Diff.	95.00% CI of diff.	Significant?	Summary	Adjusted P Value
	0
	Group A vs. Group B	0	-5.690 to 5.690	No	ns	>0.9999
	Group A vs. Slmapk3 SlCYP76B23-OE pH7	0	-5.690 to 5.690	No	ns	>0.9999
	Group A vs. Slmapk3 SlCYP76B23-OE pH10	0	-5.690 to 5.690	No	ns	>0.9999
	Group B vs. Slmapk3 SlCYP76B23-OE pH7	0	-5.690 to 5.690	No	ns	>0.9999
	Group B vs. Slmapk3 SlCYP76B23-OE pH10	0	-5.690 to 5.690	No	ns	>0.9999
	Slmapk3 SlCYP76B23-OE pH7 vs. Slmapk3 SlCYP76B23-OE pH10	0	-5.690 to 5.690	No	ns	>0.9999
	8
	Group A vs. Group B	-25.23	-30.92 to -19.54	Yes	****	<0.0001
	Group A vs. Slmapk3 SlCYP76B23-OE pH7	-1.115	-6.805 to 4.575	No	ns	0.9525
	Group A vs. Slmapk3 SlCYP76B23-OE pH10	-27.07	-32.76 to -21.38	Yes	****	<0.0001
	Group B vs. Slmapk3 SlCYP76B23-OE pH7	24.12	18.43 to 29.81	Yes	****	<0.0001
	Group B vs. Slmapk3 SlCYP76B23-OE pH10	-1.834	-7.524 to 3.856	No	ns	0.8233
	Slmapk3 SlCYP76B23-OE pH7 vs. Slmapk3 SlCYP76B23-OE pH10	-25.95	-31.64 to -20.26	Yes	****	<0.0001
	16
	Group A vs. Group B	-29.53	-35.22 to -23.84	Yes	****	<0.0001
	Group A vs. Slmapk3 SlCYP76B23-OE pH7	3.002	-2.689 to 8.692	No	ns	0.4983
	Group A vs. Slmapk3 SlCYP76B23-OE pH10	-31.75	-37.44 to -26.06	Yes	****	<0.0001
	Group B vs. Slmapk3 SlCYP76B23-OE pH7	32.53	26.84 to 38.22	Yes	****	<0.0001
	Group B vs. Slmapk3 SlCYP76B23-OE pH10	-2.226	-7.916 to 3.465	No	ns	0.7223
	Slmapk3 SlCYP76B23-OE pH7 vs. Slmapk3 SlCYP76B23-OE pH10	-34.76	-40.45 to -29.07	Yes	****	<0.0001
	24
	Group A vs. Group B	-44.03	-49.72 to -38.34	Yes	****	<0.0001
	Group A vs. Slmapk3 SlCYP76B23-OE pH7	-0.5928	-6.283 to 5.097	No	ns	0.9923
	Group A vs. Slmapk3 SlCYP76B23-OE pH10	-45.14	-50.83 to -39.45	Yes	****	<0.0001
	Group B vs. Slmapk3 SlCYP76B23-OE pH7	43.44	37.75 to 49.13	Yes	****	<0.0001
	Group B vs. Slmapk3 SlCYP76B23-OE pH10	-1.111	-6.801 to 4.579	No	ns	0.9529
	Slmapk3 SlCYP76B23-OE pH7 vs. Slmapk3 SlCYP76B23-OE pH10	-44.55	-50.24 to -38.86	Yes	****	<0.0001
	32
	Group A vs. Group B	-33.54	-39.23 to -27.85	Yes	****	<0.0001
	Group A vs. Slmapk3 SlCYP76B23-OE pH7	-1.302	-6.992 to 4.388	No	ns	0.9272
	Group A vs. Slmapk3 SlCYP76B23-OE pH10	-33.54	-39.23 to -27.85	Yes	****	<0.0001
	Group B vs. Slmapk3 SlCYP76B23-OE pH7	32.24	26.55 to 37.93	Yes	****	<0.0001
	Group B vs. Slmapk3 SlCYP76B23-OE pH10	0	-5.690 to 5.690	No	ns	>0.9999
	Slmapk3 SlCYP76B23-OE pH7 vs. Slmapk3 SlCYP76B23-OE pH10	-32.24	-37.93 to -26.55	Yes	****	<0.0001
	Test details	Mean 1	Mean 2	Mean Diff.	SE of diff.	N1	N2	q	DF
	0
	Group A vs. Group B	0	0	0	2.123	3	3	0	40
	Group A vs. Slmapk3 SlCYP76B23-OE pH7	0	0	0	2.123	3	3	0	40
	Group A vs. Slmapk3 SlCYP76B23-OE pH10	0	0	0	2.123	3	3	0	40
	Group B vs. Slmapk3 SlCYP76B23-OE pH7	0	0	0	2.123	3	3	0	40
	Group B vs. Slmapk3 SlCYP76B23-OE pH10	0	0	0	2.123	3	3	0	40
	Slmapk3 SlCYP76B23-OE pH7 vs. Slmapk3 SlCYP76B23-OE pH10	0	0	0	2.123	3	3	0	40
	8
	Group A vs. Group B	26.09	51.33	-25.23	2.123	3	3	16.81	40
	Group A vs. Slmapk3 SlCYP76B23-OE pH7	26.09	27.21	-1.115	2.123	3	3	0.7428	40
	Group A vs. Slmapk3 SlCYP76B23-OE pH10	26.09	53.16	-27.07	2.123	3	3	18.03	40
	Group B vs. Slmapk3 SlCYP76B23-OE pH7	51.33	27.21	24.12	2.123	3	3	16.07	40
	Group B vs. Slmapk3 SlCYP76B23-OE pH10	51.33	53.16	-1.834	2.123	3	3	1.222	40
	Slmapk3 SlCYP76B23-OE pH7 vs. Slmapk3 SlCYP76B23-OE pH10	27.21	53.16	-25.95	2.123	3	3	17.29	40
	16
	Group A vs. Group B	43.26	72.79	-29.53	2.123	3	3	19.67	40
	Group A vs. Slmapk3 SlCYP76B23-OE pH7	43.26	40.26	3.002	2.123	3	3	2	40
	Group A vs. Slmapk3 SlCYP76B23-OE pH10	43.26	75.02	-31.75	2.123	3	3	21.15	40
	Group B vs. Slmapk3 SlCYP76B23-OE pH7	72.79	40.26	32.53	2.123	3	3	21.67	40
	Group B vs. Slmapk3 SlCYP76B23-OE pH10	72.79	75.02	-2.226	2.123	3	3	1.483	40
	Slmapk3 SlCYP76B23-OE pH7 vs. Slmapk3 SlCYP76B23-OE pH10	40.26	75.02	-34.76	2.123	3	3	23.15	40
	24
	Group A vs. Group B	54.86	98.89	-44.03	2.123	3	3	29.33	40
	Group A vs. Slmapk3 SlCYP76B23-OE pH7	54.86	55.45	-0.5928	2.123	3	3	0.3949	40
	Group A vs. Slmapk3 SlCYP76B23-OE pH10	54.86	100	-45.14	2.123	3	3	30.07	40
	Group B vs. Slmapk3 SlCYP76B23-OE pH7	98.89	55.45	43.44	2.123	3	3	28.94	40
	Group B vs. Slmapk3 SlCYP76B23-OE pH10	98.89	100	-1.111	2.123	3	3	0.7402	40
	Slmapk3 SlCYP76B23-OE pH7 vs. Slmapk3 SlCYP76B23-OE pH10	55.45	100	-44.55	2.123	3	3	29.68	40
	32
	Group A vs. Group B	66.46	100	-33.54	2.123	3	3	22.35	40
	Group A vs. Slmapk3 SlCYP76B23-OE pH7	66.46	67.76	-1.302	2.123	3	3	0.8674	40
	Group A vs. Slmapk3 SlCYP76B23-OE pH10	66.46	100	-33.54	2.123	3	3	22.35	40
	Group B vs. Slmapk3 SlCYP76B23-OE pH7	100	67.76	32.24	2.123	3	3	21.48	40
	Group B vs. Slmapk3 SlCYP76B23-OE pH10	100	100	0	2.123	3	3	0	40
	Slmapk3 SlCYP76B23-OE pH7 vs. Slmapk3 SlCYP76B23-OE pH10	67.76	100	-32.24	2.123	3	3	21.48	40
	2.37037	8.08313	14.2608	8.91746	14.4258
	2.4024	8.14795	14.4028	8.97732	14.5781
	2.43443	8.21304	14.5454	9.0374	14.7312
	2.46647	8.27841	14.6888	9.09768	14.8851
	2.4985	8.34405	14.8328	9.15817	15.0397
	2.53053	8.40997	14.9774	9.21886	15.1951
	2.56256	8.47615	15.1228	9.27977	15.3512
	2.59459	8.54261	15.2688	9.34088	15.5081
	2.62663	8.60934	15.4155	9.40221	15.6658
	2.65866	8.67633	15.5628	9.46373	15.8241
	2.69069	8.74359	15.7108	9.52547	15.9832
	2.72272	8.81112	15.8594	9.5874	16.1431
	2.75475	8.87892	16.0087	9.64955	16.3036
	2.78679	8.94698	16.1586	9.71189	16.4649
	2.81882	9.0153	16.3092	9.77444	16.6269
	2.85085	9.08389	16.4603	9.83719	16.7896
	2.88288	9.15274	16.6122	9.90015	16.9529
	2.91491	9.22186	16.7646	9.9633	17.117
	2.94695	9.29123	16.9176	10.0267	17.2818
	2.97898	9.36086	17.0713	10.0902	17.4472
	3.01101	9.43076	17.2256	10.154	17.6134
	3.04304	9.5009	17.3805	10.2179	17.7802
	3.07508	9.57131	17.536	10.2821	17.9476
	3.10711	9.64197	17.692	10.3464	18.1158
	3.13914	9.71289	17.8487	10.411	18.2846
	3.17117	9.78406	18.006	10.4757	18.454
	3.2032	9.85548	18.1638	10.5407	18.6241
	3.23524	9.92715	18.3222	10.6058	18.7948
	3.26727	9.99908	18.4812	10.6711	18.9661
	3.2993	10.0713	18.6407	10.7366	19.1381
	3.33133	10.1437	18.8008	10.8024	19.3107
	3.36336	10.2163	18.9615	10.8683	19.4838
	3.3954	10.2893	19.1227	10.9344	19.6576
	3.42743	10.3624	19.2845	11.0007	19.832
	3.45946	10.4358	19.4468	11.0671	20.007
	3.49149	10.5095	19.6096	11.1338	20.1826
	3.52352	10.5834	19.773	11.2007	20.3588
	3.55556	10.6575	19.9369	11.2677	20.5355
	3.58759	10.7319	20.1013	11.3349	20.7128
	3.61962	10.8065	20.2663	11.4023	20.8906
	3.65165	10.8813	20.4317	11.4699	21.0691
	3.68368	10.9564	20.5976	11.5377	21.248
	3.71572	11.0317	20.7641	11.6057	21.4275
	3.74775	11.1072	20.931	11.6739	21.6075
	3.77978	11.183	21.0985	11.7422	21.7881
	3.81181	11.259	21.2664	11.8107	21.9692
	3.84384	11.3353	21.4348	11.8794	22.1508
	3.87588	11.4117	21.6036	11.9483	22.3329
	3.90791	11.4884	21.773	12.0173	22.5155
	3.93994	11.5653	21.9428	12.0866	22.6986
	3.97197	11.6425	22.113	12.156	22.8822
	4.004	11.7199	22.2837	12.2256	23.0663
	4.03604	11.7974	22.4549	12.2953	23.2508
	4.06807	11.8753	22.6265	12.3653	23.4358
	4.1001	11.9533	22.7985	12.4354	23.6213
	4.13213	12.0315	22.9709	12.5057	23.8072
	4.16416	12.11	23.1438	12.5762	23.9936
	4.1962	12.1887	23.3171	12.6468	24.1804
	4.22823	12.2676	23.4908	12.7176	24.3677
	4.26026	12.3467	23.6649	12.7886	24.5554
	4.29229	12.426	23.8395	12.8597	24.7435
	4.32432	12.5055	24.0144	12.931	24.932
	4.35636	12.5853	24.1897	13.0025	25.1209
	4.38839	12.6652	24.3654	13.0741	25.3102
	4.42042	12.7454	24.5414	13.146	25.4999
	4.45245	12.8257	24.7179	13.2179	25.69
	4.48448	12.9063	24.8947	13.2901	25.8805
	4.51652	12.987	25.0719	13.3624	26.0713
	4.54855	13.068	25.2494	13.4348	26.2625
	4.58058	13.1492	25.4273	13.5075	26.4541
	4.61261	13.2305	25.6055	13.5803	26.646
	4.64464	13.3121	25.7841	13.6532	26.8383
	4.67668	13.3938	25.9629	13.7263	27.0309
	4.70871	13.4758	26.1422	13.7996	27.2238
	4.74074	13.5579	26.3217	13.873	27.4171
	4.77277	13.6402	26.5016	13.9466	27.6107
	4.8048	13.7228	26.6818	14.0203	27.8046
	4.83684	13.8055	26.8623	14.0942	27.9987
	4.86887	13.8884	27.043	14.1682	28.1932
	4.9009	13.9714	27.2241	14.2424	28.388
	4.93293	14.0547	27.4055	14.3168	28.5831
	4.96496	14.1381	27.5871	14.3913	28.7784
	4.997	14.2218	27.7691	14.4659	28.974
	5.02903	14.3056	27.9513	14.5407	29.1698
	5.06106	14.3895	28.1337	14.6157	29.366
	5.09309	14.4737	28.3165	14.6907	29.5623
	5.12513	14.558	28.4994	14.766	29.7589
	5.15716	14.6425	28.6827	14.8414	29.9558
	5.18919	14.7272	28.8662	14.9169	30.1529
	5.22122	14.8121	29.0499	14.9925	30.3502
	5.25325	14.8971	29.2338	15.0684	30.5477
	5.28529	14.9823	29.418	15.1443	30.7454
	5.31732	15.0676	29.6024	15.2204	30.9433
	5.34935	15.1531	29.787	15.2966	31.1414
	5.38138	15.2388	29.9718	15.373	31.3397
	5.41341	15.3246	30.1568	15.4495	31.5382
	5.44545	15.4106	30.3421	15.5261	31.7369
	5.47748	15.4968	30.5275	15.6029	31.9357
	5.50951	15.5831	30.7131	15.6798	32.1347
	5.54154	15.6696	30.8989	15.7569	32.3338
	5.57357	15.7562	31.0849	15.834	32.5331
	5.60561	15.843	31.271	15.9114	32.7325
	5.63764	15.9299	31.4573	15.9888	32.9321
	5.66967	16.017	31.6438	16.0664	33.1318
	5.7017	16.1042	31.8304	16.1441	33.3316
	5.73373	16.1916	32.0172	16.2219	33.5316
	5.76577	16.2791	32.2041	16.2998	33.7316
	5.7978	16.3667	32.3911	16.3779	33.9317
	5.82983	16.4545	32.5783	16.4561	34.132
	5.86186	16.5425	32.7656	16.5345	34.3323
	5.89389	16.6306	32.9531	16.6129	34.5328
	5.92593	16.7188	33.1406	16.6915	34.7333
	5.95796	16.8071	33.3283	16.7702	34.9338
	5.98999	16.8956	33.5161	16.849	35.1345
	6.02202	16.9842	33.704	16.9279	35.3352
	6.05405	17.073	33.8919	17.007	35.5359
	6.08609	17.1619	34.08	17.0861	35.7367
	6.11812	17.2509	34.2682	17.1654	35.9375
	6.15015	17.34	34.4564	17.2448	36.1384
	6.18218	17.4292	34.6447	17.3243	36.3393
	6.21421	17.5186	34.8331	17.4039	36.5402
	6.24625	17.6081	35.0215	17.4837	36.7412
	6.27828	17.6978	35.21	17.5635	36.9421
	6.31031	17.7875	35.3986	17.6435	37.1431
	6.34234	17.8773	35.5872	17.7235	37.344
	6.37437	17.9673	35.7759	17.8037	37.545
	6.40641	18.0574	35.9646	17.884	37.7459
	6.43844	18.1476	36.1533	17.9644	37.9468
	6.47047	18.2379	36.342	18.0449	38.1477
	6.5025	18.3283	36.5308	18.1255	38.3486
	6.53453	18.4189	36.7196	18.2062	38.5494
	6.56657	18.5095	36.9085	18.287	38.7502
	6.5986	18.6002	37.0973	18.3679	38.9509
	6.63063	18.6911	37.2861	18.4488	39.1516
	6.66266	18.782	37.475	18.5299	39.3522
	6.69469	18.8731	37.6638	18.6111	39.5528
	6.72673	18.9642	37.8526	18.6924	39.7533
	6.75876	19.0554	38.0414	18.7738	39.9537
	6.79079	19.1468	38.2302	18.8553	40.154
	6.82282	19.2382	38.419	18.9369	40.3543
	6.85485	19.3297	38.6077	19.0185	40.5544
	6.88689	19.4213	38.7964	19.1003	40.7545
	6.91892	19.513	38.9851	19.1822	40.9544
	6.95095	19.6048	39.1737	19.2641	41.1543
	6.98298	19.6967	39.3623	19.3461	41.354
	7.01502	19.7887	39.5508	19.4282	41.5537
	7.04705	19.8807	39.7393	19.5105	41.7532
	7.07908	19.9728	39.9277	19.5927	41.9525
	7.11111	20.065	40.116	19.6751	42.1518
	7.14314	20.1573	40.3043	19.7576	42.3509
	7.17518	20.2497	40.4925	19.8401	42.5499
	7.20721	20.3421	40.6806	19.9227	42.7487
	7.23924	20.4346	40.8687	20.0054	42.9473
	7.27127	20.5272	41.0566	20.0882	43.1458
	7.3033	20.6198	41.2445	20.1711	43.3442
	7.33534	20.7126	41.4323	20.254	43.5424
	7.36737	20.8054	41.6199	20.337	43.7404
	7.3994	20.8982	41.8075	20.4201	43.9382
	7.43143	20.9911	41.9949	20.5033	44.1358
	7.46346	21.0841	42.1823	20.5865	44.3333
	7.4955	21.1772	42.3695	20.6698	44.5306
	7.52753	21.2703	42.5566	20.7532	44.7276
	7.55956	21.3634	42.7436	20.8367	44.9245
	7.59159	21.4567	42.9305	20.9202	45.1212
	7.62362	21.5499	43.1172	21.0038	45.3177
	7.65566	21.6433	43.3038	21.0874	45.5139
	7.68769	21.7367	43.4902	21.1712	45.71
	7.71972	21.8301	43.6765	21.255	45.9058
	7.75175	21.9236	43.8626	21.3388	46.1014
	7.78378	22.0171	44.0486	21.4227	46.2967
	7.81582	22.1107	44.2345	21.5067	46.4918
	7.84785	22.2044	44.4201	21.5908	46.6867
	7.87988	22.298	44.6057	21.6749	46.8814
	7.91191	22.3918	44.791	21.759	47.0758
	7.94394	22.4855	44.9762	21.8432	47.2699
	7.97598	22.5793	45.1612	21.9275	47.4638
	8.00801	22.6732	45.346	22.0119	47.6574
	8.04004	22.767	45.5306	22.0962	47.8508
	8.07207	22.8609	45.7151	22.1807	48.0439
	8.1041	22.9549	45.8994	22.2652	48.2368
	8.13614	23.0489	46.0834	22.3497	48.4293
	8.16817	23.1429	46.2673	22.4343	48.6216
	8.2002	23.2369	46.451	22.519	48.8136
	8.23223	23.331	46.6344	22.6037	49.0053
	8.26426	23.4251	46.8177	22.6884	49.1967
	8.2963	23.5192	47.0007	22.7732	49.3879
	8.32833	23.6133	47.1836	22.8581	49.5787
	8.36036	23.7075	47.3662	22.943	49.7693
	8.39239	23.8017	47.5486	23.0279	49.9595
	8.42442	23.8959	47.7308	23.1129	50.1494
	8.45646	23.9901	47.9127	23.1979	50.3391
	8.48849	24.0844	48.0944	23.283	50.5284
	8.52052	24.1786	48.2759	23.3681	50.7174
	8.55255	24.2729	48.4571	23.4532	50.906
	8.58458	24.3672	48.6381	23.5384	51.0944
	8.61662	24.4615	48.8189	23.6236	51.2824
	8.64865	24.5558	48.9994	23.7089	51.4701
	8.68068	24.6501	49.1797	23.7942	51.6575
	8.71271	24.7445	49.3597	23.8795	51.8445
	8.74474	24.8388	49.5395	23.9649	52.0312
	8.77678	24.9331	49.719	24.0503	52.2175
	8.80881	25.0275	49.8982	24.1357	52.4035
	8.84084	25.1218	50.0772	24.2212	52.5892
	8.87287	25.2162	50.2559	24.3067	52.7745
	8.9049	25.3105	50.4343	24.3922	52.9595
	8.93694	25.4048	50.6125	24.4777	53.1441
	8.96897	25.4992	50.7904	24.5633	53.3283
	9.001	25.5935	50.968	24.6489	53.5122
	9.03303	25.6878	51.1453	24.7345	53.6957
	9.06507	25.7822	51.3224	24.8202	53.8788
	9.0971	25.8765	51.4992	24.9059	54.0616
	9.12913	25.9708	51.6756	24.9916	54.244
	9.16116	26.0651	51.8518	25.0773	54.426
	9.19319	26.1594	52.0277	25.163	54.6077
	9.22523	26.2536	52.2033	25.2488	54.789
	9.25726	26.3479	52.3786	25.3346	54.9698
	9.28929	26.4421	52.5536	25.4204	55.1504
	9.32132	26.5364	52.7283	25.5062	55.3305
	9.35335	26.6306	52.9027	25.592	55.5102
	9.38539	26.7247	53.0768	25.6779	55.6895
	9.41742	26.8189	53.2505	25.7637	55.8685
	9.44945	26.9131	53.424	25.8496	56.047
	9.48148	27.0072	53.5971	25.9355	56.2252
	9.51351	27.1013	53.7699	26.0214	56.4029
	9.54555	27.1953	53.9424	26.1073	56.5803
	9.57758	27.2894	54.1146	26.1932	56.7572
	9.60961	27.3834	54.2865	26.2792	56.9337
	9.64164	27.4774	54.458	26.3651	57.1099
	9.67367	27.5713	54.6292	26.451	57.2856
	9.70571	27.6652	54.8001	26.537	57.4609
	9.73774	27.7591	54.9706	26.6229	57.6358
	9.76977	27.853	55.1408	26.7089	57.8102
	9.8018	27.9468	55.3107	26.7949	57.9843
	9.83383	28.0406	55.4802	26.8808	58.1579
	9.86587	28.1343	55.6494	26.9668	58.3311
	9.8979	28.228	55.8183	27.0528	58.5039
	9.92993	28.3217	55.9868	27.1388	58.6763
	9.96196	28.4153	56.1549	27.2247	58.8482
	9.99399	28.5089	56.3228	27.3107	59.0197
	10.026	28.6024	56.4902	27.3967	59.1908
	10.0581	28.6959	56.6573	27.4826	59.3614
	10.0901	28.7894	56.8241	27.5686	59.5316
	10.1221	28.8828	56.9905	27.6546	59.7014
	10.1542	28.9762	57.1565	27.7405	59.8707
	10.1862	29.0695	57.3222	27.8265	60.0396
	10.2182	29.1627	57.4875	27.9124	60.2081
	10.2503	29.2559	57.6525	27.9983	60.3761
	10.2823	29.3491	57.8171	28.0842	60.5436
	10.3143	29.4422	57.9813	28.1702	60.7108
	10.3463	29.5352	58.1452	28.2561	60.8775
	10.3784	29.6282	58.3087	28.3419	61.0437
	10.4104	29.7211	58.4718	28.4278	61.2095
	10.4424	29.814	58.6346	28.5137	61.3748
	10.4745	29.9068	58.797	28.5995	61.5397
	10.5065	29.9996	58.959	28.6854	61.7042
	10.5385	30.0923	59.1206	28.7712	61.8681
	10.5706	30.1849	59.2819	28.857	62.0317
	10.6026	30.2775	59.4428	28.9428	62.1948
	10.6346	30.37	59.6033	29.0285	62.3574
	10.6667	30.4624	59.7634	29.1143	62.5195
	10.6987	30.5548	59.9232	29.2	62.6813
	10.7307	30.6471	60.0825	29.2857	62.8425
	10.7628	30.7394	60.2415	29.3714	63.0033
	10.7948	30.8316	60.4001	29.4571	63.1636
	10.8268	30.9237	60.5583	29.5427	63.3235
	10.8589	31.0157	60.7161	29.6283	63.4829
	10.8909	31.1077	60.8736	29.7139	63.6419
	10.9229	31.1995	61.0306	29.7995	63.8003
	10.955	31.2914	61.1873	29.885	63.9584
	10.987	31.3831	61.3435	29.9705	64.1159
	11.019	31.4748	61.4994	30.056	64.273
	11.0511	31.5664	61.6548	30.1415	64.4296
	11.0831	31.6579	61.8099	30.2269	64.5858
	11.1151	31.7493	61.9646	30.3123	64.7414
	11.1471	31.8407	62.1189	30.3977	64.8967
	11.1792	31.9319	62.2728	30.483	65.0514
	11.2112	32.0231	62.4262	30.5683	65.2057
	11.2432	32.1143	62.5793	30.6536	65.3595
	11.2753	32.2053	62.732	30.7388	65.5128
	11.3073	32.2962	62.8843	30.824	65.6657
	11.3393	32.3871	63.0362	30.9092	65.8181
	11.3714	32.4779	63.1877	30.9943	65.97
	11.4034	32.5686	63.3387	31.0794	66.1214
	11.4354	32.6592	63.4894	31.1645	66.2724
	11.4675	32.7497	63.6397	31.2495	66.4229
	11.4995	32.8401	63.7895	31.3345	66.5729
	11.5315	32.9304	63.939	31.4195	66.7225
	11.5636	33.0207	64.088	31.5044	66.8716
	11.5956	33.1108	64.2367	31.5892	67.0202
	11.6276	33.2009	64.3849	31.674	67.1683
	11.6597	33.2909	64.5327	31.7588	67.3159
	11.6917	33.3807	64.6801	31.8436	67.4631
	11.7237	33.4705	64.8271	31.9283	67.6098
	11.7558	33.5602	64.9737	32.0129	67.756
	11.7878	33.6498	65.1199	32.0975	67.9018
	11.8198	33.7393	65.2657	32.1821	68.047
	11.8519	33.8287	65.411	32.2666	68.1918
	11.8839	33.918	65.556	32.3511	68.3362
	11.9159	34.0072	65.7005	32.4355	68.48
	11.9479	34.0963	65.8446	32.5198	68.6234
	11.98	34.1853	65.9883	32.6042	68.7663
	12.012	34.2742	66.1316	32.6884	68.9087
	12.044	34.3629	66.2745	32.7727	69.0506
	12.0761	34.4516	66.4169	32.8568	69.1921
	12.1081	34.5402	66.559	32.9409	69.333
	12.1401	34.6287	66.7006	33.025	69.4735
	12.1722	34.7171	66.8418	33.109	69.6136
	12.2042	34.8053	66.9826	33.193	69.7531
	12.2362	34.8935	67.123	33.2769	69.8922
	12.2683	34.9815	67.2629	33.3607	70.0308
	12.3003	35.0695	67.4025	33.4445	70.1689
	12.3323	35.1573	67.5416	33.5283	70.3066
	12.3644	35.2451	67.6803	33.612	70.4438
	12.3964	35.3327	67.8186	33.6956	70.5804
	12.4284	35.4202	67.9565	33.7792	70.7167
	12.4605	35.5076	68.0939	33.8627	70.8524
	12.4925	35.5948	68.231	33.9461	70.9877
	12.5245	35.682	68.3676	34.0295	71.1225
	12.5566	35.7691	68.5038	34.1128	71.2568
	12.5886	35.856	68.6396	34.1961	71.3907
	12.6206	35.9428	68.7749	34.2793	71.524
	12.6527	36.0295	68.9099	34.3625	71.6569
	12.6847	36.1161	69.0444	34.4455	71.7894
	12.7167	36.2026	69.1785	34.5286	71.9213
	12.7487	36.289	69.3122	34.6115	72.0528
	12.7808	36.3752	69.4455	34.6944	72.1838
	12.8128	36.4613	69.5783	34.7772	72.3144
	12.8448	36.5473	69.7107	34.86	72.4444
	12.8769	36.6332	69.8428	34.9427	72.574
	12.9089	36.719	69.9743	35.0253	72.7032
	12.9409	36.8046	70.1055	35.1079	72.8318
	12.973	36.8902	70.2363	35.1903	72.96
	13.005	36.9756	70.3666	35.2728	73.0878
	13.037	37.0608	70.4965	35.3551	73.215
	13.0691	37.146	70.626	35.4374	73.3418
	13.1011	37.231	70.7551	35.5196	73.4681
	13.1331	37.3159	70.8838	35.6018	73.594
	13.1652	37.4007	71.012	35.6838	73.7194
	13.1972	37.4854	71.1399	35.7658	73.8443
	13.2292	37.5699	71.2673	35.8478	73.9687
	13.2613	37.6543	71.3943	35.9296	74.0927
	13.2933	37.7386	71.5209	36.0114	74.2163
	13.3253	37.8227	71.647	36.0931	74.3393
	13.3574	37.9067	71.7728	36.1747	74.4619
	13.3894	37.9906	71.8981	36.2563	74.5841
	13.4214	38.0744	72.023	36.3378	74.7058
	13.4535	38.158	72.1475	36.4192	74.827
	13.4855	38.2415	72.2716	36.5005	74.9478
	13.5175	38.3249	72.3953	36.5818	75.0681
	13.5495	38.4082	72.5186	36.6629	75.1879
	13.5816	38.4913	72.6414	36.744	75.3073
	13.6136	38.5742	72.7638	36.825	75.4262
	13.6456	38.6571	72.8859	36.906	75.5447
	13.6777	38.7398	73.0075	36.9868	75.6627
	13.7097	38.8224	73.1286	37.0676	75.7803
	13.7417	38.9048	73.2494	37.1483	75.8974
	13.7738	38.9871	73.3698	37.2289	76.0141
	13.8058	39.0693	73.4897	37.3095	76.1303
	13.8378	39.1514	73.6093	37.3899	76.246
	13.8699	39.2333	73.7284	37.4703	76.3613
	13.9019	39.3151	73.8471	37.5506	76.4762
	13.9339	39.3967	73.9655	37.6308	76.5906
	13.966	39.4782	74.0834	37.7109	76.7045
	13.998	39.5596	74.2009	37.791	76.818
	14.03	39.6408	74.3179	37.8709	76.9311
	14.0621	39.7219	74.4346	37.9508	77.0437
	14.0941	39.8028	74.5509	38.0306	77.1559
	14.1261	39.8836	74.6668	38.1103	77.2676
	14.1582	39.9643	74.7822	38.1899	77.3789
	14.1902	40.0448	74.8973	38.2694	77.4898
	14.2222	40.1252	75.0119	38.3488	77.6002
	14.2543	40.2055	75.1262	38.4282	77.7101
	14.2863	40.2856	75.24	38.5074	77.8196
	14.3183	40.3656	75.3534	38.5866	77.9287
	14.3504	40.4454	75.4665	38.6657	78.0374
	14.3824	40.5251	75.5791	38.7447	78.1456
	14.4144	40.6046	75.6913	38.8236	78.2534
	14.4464	40.684	75.8031	38.9024	78.3607
	14.4785	40.7633	75.9146	38.9811	78.4676
	14.5105	40.8424	76.0256	39.0598	78.5741
	14.5425	40.9214	76.1362	39.1383	78.6801
	14.5746	41.0002	76.2464	39.2168	78.7857
	14.6066	41.0789	76.3563	39.2951	78.8909
	14.6386	41.1575	76.4657	39.3734	78.9957
	14.6707	41.2359	76.5747	39.4516	79.1
	14.7027	41.3141	76.6834	39.5296	79.2039
	14.7347	41.3923	76.7916	39.6076	79.3074
	14.7668	41.4702	76.8995	39.6855	79.4104
	14.7988	41.548	77.0069	39.7633	79.513
	14.8308	41.6257	77.114	39.841	79.6152
	14.8629	41.7032	77.2206	39.9186	79.717
	14.8949	41.7806	77.3269	39.9961	79.8184
	14.9269	41.8579	77.4328	40.0735	79.9193
	14.959	41.935	77.5383	40.1509	80.0198
	14.991	42.0119	77.6434	40.2281	80.1199
	15.023	42.0887	77.7481	40.3052	80.2196
	15.0551	42.1654	77.8524	40.3822	80.3189
	15.0871	42.2419	77.9564	40.4592	80.4177
	15.1191	42.3182	78.0599	40.536	80.5162
	15.1512	42.3944	78.1631	40.6127	80.6142
	15.1832	42.4705	78.2658	40.6894	80.7118
	15.2152	42.5464	78.3682	40.7659	80.809
	15.2472	42.6221	78.4702	40.8423	80.9058
	15.2793	42.6978	78.5719	40.9187	81.0022
	15.3113	42.7732	78.6731	40.9949	81.0982
	15.3433	42.8485	78.774	41.0711	81.1938
	15.3754	42.9237	78.8744	41.1471	81.289
	15.4074	42.9987	78.9745	41.223	81.3838
	15.4394	43.0736	79.0743	41.2989	81.4781
	15.4715	43.1483	79.1736	41.3746	81.5721
	15.5035	43.2228	79.2726	41.4502	81.6657
	15.5355	43.2973	79.3711	41.5258	81.7588
	15.5676	43.3715	79.4694	41.6012	81.8516
	15.5996	43.4456	79.5672	41.6765	81.944
	15.6316	43.5196	79.6646	41.7517	82.036
	15.6637	43.5934	79.7617	41.8269	82.1276
	15.6957	43.6671	79.8584	41.9019	82.2187
	15.7277	43.7406	79.9548	41.9768	82.3095
	15.7598	43.8139	80.0508	42.0516	82.4
	15.7918	43.8871	80.1464	42.1263	82.49
	15.8238	43.9602	80.2416	42.2009	82.5796
	15.8559	44.0331	80.3365	42.2754	82.6688
	15.8879	44.1058	80.4309	42.3498	82.7577
	15.9199	44.1784	80.5251	42.424	82.8462
	15.952	44.2508	80.6188	42.4982	82.9343
	15.984	44.3231	80.7122	42.5723	83.022
	16.016	44.3953	80.8053	42.6463	83.1093
	16.048	44.4672	80.8979	42.7201	83.1962
	16.0801	44.5391	80.9902	42.7939	83.2828
	16.1121	44.6107	81.0822	42.8675	83.369
	16.1441	44.6823	81.1738	42.941	83.4548
	16.1762	44.7536	81.265	43.0145	83.5402
	16.2082	44.8248	81.3559	43.0878	83.6253
	16.2402	44.8959	81.4464	43.161	83.71
	16.2723	44.9668	81.5365	43.2341	83.7943
	16.3043	45.0376	81.6263	43.3071	83.8782
	16.3363	45.1082	81.7157	43.38	83.9618
	16.3684	45.1786	81.8048	43.4528	84.045
	16.4004	45.2489	81.8936	43.5254	84.1278
	16.4324	45.319	81.9819	43.598	84.2103
	16.4645	45.389	82.07	43.6705	84.2924
	16.4965	45.4589	82.1576	43.7428	84.3741
	16.5285	45.5285	82.245	43.815	84.4555
	16.5606	45.5981	82.3319	43.8871	84.5365
	16.5926	45.6674	82.4186	43.9592	84.6172
	16.6246	45.7366	82.5048	44.0311	84.6975
	16.6567	45.8057	82.5908	44.1028	84.7774
	16.6887	45.8746	82.6764	44.1745	84.857
	16.7207	45.9434	82.7616	44.2461	84.9362
	16.7528	46.012	82.8465	44.3175	85.0151
	16.7848	46.0804	82.9311	44.3889	85.0936
	16.8168	46.1487	83.0153	44.4601	85.1718
	16.8488	46.2168	83.0992	44.5312	85.2496
	16.8809	46.2848	83.1827	44.6022	85.327
	16.9129	46.3526	83.2659	44.6731	85.4041
	16.9449	46.4203	83.3488	44.7439	85.4809
	16.977	46.4878	83.4313	44.8146	85.5573
	17.009	46.5552	83.5135	44.8851	85.6334
	17.041	46.6224	83.5954	44.9556	85.7091
	17.0731	46.6894	83.6769	45.0259	85.7845
	17.1051	46.7563	83.7581	45.0961	85.8596
	17.1371	46.823	83.8389	45.1662	85.9343
	17.1692	46.8896	83.9195	45.2362	86.0086
	17.2012	46.9561	83.9997	45.3061	86.0827
	17.2332	47.0223	84.0795	45.3759	86.1564
	17.2653	47.0884	84.1591	45.4455	86.2297
	17.2973	47.1544	84.2383	45.515	86.3028
	17.3293	47.2202	84.3172	45.5845	86.3754
	17.3614	47.2859	84.3957	45.6538	86.4478
	17.3934	47.3514	84.474	45.723	86.5198
	17.4254	47.4167	84.5519	45.792	86.5915
	17.4575	47.4819	84.6295	45.861	86.6629
	17.4895	47.547	84.7068	45.9298	86.7339
	17.5215	47.6118	84.7837	45.9986	86.8047
	17.5536	47.6766	84.8603	46.0672	86.8751
	17.5856	47.7411	84.9367	46.1357	86.9451
	17.6176	47.8056	85.0127	46.2041	87.0149
	17.6496	47.8698	85.0883	46.2723	87.0843
	17.6817	47.9339	85.1637	46.3405	87.1534
	17.7137	47.9979	85.2388	46.4085	87.2222
	17.7457	48.0617	85.3135	46.4764	87.2907
	17.7778	48.1254	85.3879	46.5442	87.3588
	17.8098	48.1888	85.462	46.6119	87.4266
	17.8418	48.2522	85.5358	46.6795	87.4942
	17.8739	48.3154	85.6093	46.7469	87.5614
	17.9059	48.3784	85.6825	46.8143	87.6283
	17.9379	48.4413	85.7554	46.8815	87.6949
	17.97	48.504	85.828	46.9486	87.7611
	18.002	48.5666	85.9002	47.0156	87.8271
	18.034	48.629	85.9722	47.0824	87.8928
	18.0661	48.6913	86.0439	47.1492	87.9581
	18.0981	48.7534	86.1152	47.2158	88.0232
	18.1301	48.8153	86.1863	47.2823	88.0879
	18.1622	48.8771	86.257	47.3487	88.1524
	18.1942	48.9388	86.3275	47.415	88.2165
	18.2262	49.0003	86.3976	47.4812	88.2804
	18.2583	49.0616	86.4675	47.5472	88.3439
	18.2903	49.1228	86.537	47.6131	88.4072
	18.3223	49.1839	86.6063	47.6789	88.4701
	18.3544	49.2447	86.6753	47.7446	88.5328
	18.3864	49.3055	86.744	47.8102	88.5951
	18.4184	49.3661	86.8123	47.8757	88.6572
	18.4505	49.4265	86.8804	47.941	88.719
	18.4825	49.4868	86.9482	48.0062	88.7804
	18.5145	49.5469	87.0157	48.0713	88.8416
	18.5465	49.6069	87.083	48.1363	88.9025
	18.5786	49.6667	87.1499	48.2011	88.9632
	18.6106	49.7264	87.2166	48.2659	89.0235
	18.6426	49.7859	87.2829	48.3305	89.0835
	18.6747	49.8452	87.349	48.395	89.1433
	18.7067	49.9044	87.4148	48.4594	89.2028
	18.7387	49.9635	87.4803	48.5237	89.262
	18.7708	50.0224	87.5455	48.5878	89.3209
	18.8028	50.0812	87.6105	48.6519	89.3795
	18.8348	50.1398	87.6751	48.7158	89.4379
	18.8669	50.1982	87.7395	48.7796	89.496
	18.8989	50.2566	87.8036	48.8432	89.5538
	18.9309	50.3147	87.8675	48.9068	89.6113
	18.963	50.3727	87.931	48.9702	89.6686
	18.995	50.4306	87.9943	49.0335	89.7255
	19.027	50.4883	88.0573	49.0967	89.7823
	19.0591	50.5458	88.12	49.1598	89.8387
	19.0911	50.6032	88.1825	49.2228	89.8949
	19.1231	50.6605	88.2447	49.2856	89.9508
	19.1552	50.7176	88.3066	49.3483	90.0064
	19.1872	50.7746	88.3683	49.4109	90.0618
	19.2192	50.8314	88.4296	49.4734	90.1169
	19.2513	50.888	88.4907	49.5358	90.1717
	19.2833	50.9445	88.5516	49.598	90.2263
	19.3153	51.0009	88.6122	49.6601	90.2806
	19.3473	51.0571	88.6725	49.7221	90.3346
	19.3794	51.1132	88.7325	49.784	90.3884
	19.4114	51.1691	88.7923	49.8458	90.442
	19.4434	51.2248	88.8518	49.9074	90.4952
	19.4755	51.2805	88.9111	49.969	90.5483
	19.5075	51.3359	88.9701	50.0304	90.601
	19.5395	51.3913	89.0289	50.0916	90.6535
	19.5716	51.4464	89.0874	50.1528	90.7058
	19.6036	51.5015	89.1456	50.2139	90.7578
	19.6356	51.5563	89.2036	50.2748	90.8096
	19.6677	51.6111	89.2613	50.3356	90.8611
	19.6997	51.6657	89.3187	50.3963	90.9123
	19.7317	51.7201	89.376	50.4568	90.9633
	19.7638	51.7744	89.4329	50.5173	91.0141
	19.7958	51.8285	89.4896	50.5776	91.0646
	19.8278	51.8825	89.5461	50.6378	91.1148
	19.8599	51.9364	89.6023	50.6979	91.1649
	19.8919	51.9901	89.6582	50.7579	91.2146
	19.9239	52.0437	89.714	50.8178	91.2642
	19.956	52.0971	89.7694	50.8775	91.3135
	19.988	52.1504	89.8246	50.9371	91.3625
	20.02	52.2035	89.8796	50.9966	91.4114
	20.0521	52.2565	89.9343	51.056	91.4599
	20.0841	52.3093	89.9888	51.1152	91.5083
	20.1161	52.362	90.0431	51.1744	91.5564
	20.1481	52.4146	90.0971	51.2334	91.6043
	20.1802	52.467	90.1508	51.2923	91.6519
	20.2122	52.5192	90.2043	51.351	91.6993
	20.2442	52.5714	90.2576	51.4097	91.7465
	20.2763	52.6233	90.3107	51.4682	91.7934
	20.3083	52.6752	90.3635	51.5267	91.8401
	20.3403	52.7269	90.416	51.585	91.8866
	20.3724	52.7784	90.4684	51.6431	91.9329
	20.4044	52.8298	90.5205	51.7012	91.9789
	20.4364	52.8811	90.5724	51.7591	92.0247
	20.4685	52.9322	90.624	51.817	92.0703
	20.5005	52.9832	90.6754	51.8747	92.1157
	20.5325	53.034	90.7266	51.9323	92.1608
	20.5646	53.0847	90.7775	51.9897	92.2057
	20.5966	53.1353	90.8282	52.0471	92.2504
	20.6286	53.1857	90.8787	52.1043	92.2949
	20.6607	53.2359	90.929	52.1614	92.3391
	20.6927	53.2861	90.979	52.2184	92.3831
	20.7247	53.3361	91.0288	52.2753	92.427
	20.7568	53.3859	91.0784	52.332	92.4706
	20.7888	53.4356	91.1278	52.3887	92.514
	20.8208	53.4852	91.1769	52.4452	92.5571
	20.8529	53.5346	91.2258	52.5016	92.6001
	20.8849	53.5839	91.2745	52.5579	92.6428
	20.9169	53.6331	91.323	52.614	92.6854
	20.9489	53.6821	91.3712	52.6701	92.7277
	20.981	53.731	91.4193	52.726	92.7698
	21.013	53.7797	91.4671	52.7818	92.8117
	21.045	53.8283	91.5147	52.8375	92.8534
	21.0771	53.8767	91.5621	52.8931	92.8949
	21.1091	53.9251	91.6093	52.9485	92.9362
	21.1411	53.9733	91.6562	53.0039	92.9773
	21.1732	54.0213	91.703	53.0591	93.0182
	21.2052	54.0692	91.7495	53.1142	93.0588
	21.2372	54.117	91.7958	53.1692	93.0993
	21.2693	54.1646	91.8419	53.224	93.1396
	21.3013	54.2121	91.8878	53.2788	93.1796
	21.3333	54.2595	91.9335	53.3334	93.2195
	21.3654	54.3067	91.979	53.3879	93.2592
	21.3974	54.3538	92.0243	53.4423	93.2987
	21.4294	54.4008	92.0693	53.4966	93.3379
	21.4615	54.4476	92.1142	53.5508	93.377
	21.4935	54.4943	92.1589	53.6048	93.4159
	21.5255	54.5408	92.2033	53.6587	93.4546
	21.5576	54.5872	92.2476	53.7125	93.4931
	21.5896	54.6335	92.2916	53.7662	93.5314
	21.6216	54.6797	92.3355	53.8198	93.5695
[truncated: 395 more rows]

## Sheet: Supplementary Fig. S1
Supplementary Fig. S1B	date
		WT			Slhsl1 Slhsl2 Slhsl3
	Solyc04g009440	1.18295	0.944979	0.872068	0.186489	0.240837	0.202861
	Solyc09g075930	1.00838	1.06639	0.925224	2.04764	1.37082	1.77238
	Solyc02g078650	1.08486	0.86949	1.04565	0.0585635	0.0708041	0.0680605
	Solyc07g032740	0.961314	1.07088	0.967803	2.22966	1.89938	2.17086
	Solyc08g074630	1.00987	0.914162	1.07596	0.396324	0.406993	0.520226
	Solyc08g068330	0.897675	1.04783	1.05449	0.307646	0.347092	0.320821
	Solyc08g074620	1.03221	0.945775	1.02202	0.248265	0.345354	0.377101
	Table Analyzed
	Two-way ANOVA	Ordinary
	Alpha	0.05
	Source of Variation	% of total variation	P value	P value summary	Significant?
	Interaction	45.65	<0.0001	****	Yes
	Row Factor	45.65	<0.0001	****	Yes
	Column Factor	5.306	<0.0001	****	Yes
	ANOVA table	SS	DF	MS	F (DFn, DFd)	P value
	Interaction	6	6	1	F (6, 28) = 62.94	P<0.0001
	Row Factor	6	6	1	F (6, 28) = 62.94	P<0.0001
	Column Factor	0.6973	1	0.6973	F (1, 28) = 43.89	P<0.0001
	Residual	0.4449	28	0.01589
	Difference between column means
	Mean of WT	1
	Mean of Slhsl1 Slhsl2 Slhsl3	0.7423
	Difference between means	0.2577
	SE of difference	0.0389
	95% CI of difference	0.1780 to 0.3374
	Data summary
	Number of columns (Column Factor)	2
	Number of rows (Row Factor)	7
	Number of values	42
Supplementary Fig. S1C	date
	WT	Slhsl1 Slhsl2 Slhsl3
	4.39969	2.18198
	4.68812	2.99587
	4.97691	2.65927
	Table Analyzed
	Column B	Slhsl1 Slhsl2 Slhsl3
	vs.	vs.
	Column A	WT
	Unpaired t test
	P value	0.002
	P value summary	**
	Significantly different (P < 0.05)?	Yes
	One- or two-tailed P value?	Two-tailed
	t, df	t=7.183, df=4
	How big is the difference?
	Mean of column A	4.688
	Mean of column B	2.612
	Difference between means (B - A) ± SEM	-2.076 ± 0.2890
	95% confidence interval	-2.878 to -1.273
	R squared (eta squared)	0.9281
	F test to compare variances
	F, DFn, Dfd	2.008, 2, 2
	P value	0.6649
	P value summary	ns
	Significantly different (P < 0.05)?	No
	Data analyzed
	Sample size, column A	3
	Sample size, column B	3
Supplementary Fig. S1D	date
	L-DOPA pH7	L-DOPA pH10	L-DOPA pH10 ASA
	6.83	12.23	4.93
	7.73	10.55	4.54
	7.63	11.79	3.68
	Table Analyzed
	Data sets analyzed	A-C
	ANOVA summary
	F	81.93
	P value	<0.0001
	P value summary	****
	Significant diff. among means (P < 0.05)?	Yes
	R squared	0.9647
	Brown-Forsythe test
	F (DFn, DFd)	0.1981 (2, 6)
	P value	0.8255
	P value summary	ns
	Are SDs significantly different (P < 0.05)?	No
	Bartlett's test
	Bartlett's statistic (corrected)
	P value
	P value summary
	Are SDs significantly different (P < 0.05)?
	ANOVA table	SS	DF	MS	F (DFn, DFd)	P value
	Treatment (between columns)	77.09	2	38.54	F (2, 6) = 81.93	P<0.0001
	Residual (within columns)	2.823	6	0.4704
	Total	79.91	8
	Data summary
	Number of treatments (columns)	3
	Number of values (total)	9
	Number of families	1
	Number of comparisons per family	2
	Alpha	0.05
	Dunnett's multiple comparisons test	Mean Diff.	95.00% CI of diff.	Significant?	Summary	Adjusted P Value	A-?
	L-DOPA pH7 vs. L-DOPA pH10	-4.127	-5.730 to -2.523	Yes	***	0.0006	B	L-DOPA pH10
	L-DOPA pH7 vs. L-DOPA pH10 ASA	3.013	1.410 to 4.617	Yes	**	0.0031	C	L-DOPA pH10 ASA
	Test details	Mean 1	Mean 2	Mean Diff.	SE of diff.	n1	n2	q	DF
	L-DOPA pH7 vs. L-DOPA pH10	7.397	11.52	-4.127	0.56	3	3	7.369	6
	L-DOPA pH7 vs. L-DOPA pH10 ASA	7.397	4.383	3.013	0.56	3	3	5.381	6

[truncated: 5 more sheets: Supplementary Fig. S2 , Supplementary Fig. S3, Supplementary Fig. S4, Supplementary Fig. S5, Supplementary Fig. S6 ]
