# Supplementary material
Source: Research Square preprint supplement (doi:10.21203/rs.3.rs-9357011/v1)
Supplement: Supplementary file 2 [file c8e76ceef87c1b69a92f4b1b.xlsx]

## Sheet: S1
Supplementary Data Set S1 . Differentially expressed genes from the transcriptome analysis.
Geneid	GeneName	Slhsl1 Slhsl2 Slhsl3_1	Slhsl1 Slhsl2 Slhsl3_2	Slhsl1 Slhsl2 Slhsl3_3	WT_1	WT_2	WT_3	logCPM	logFC	PValue	FDR	uniprot_ID	uniprot_Description	Refseq_ID	Refseq_Description	pfam_ID	pfam_Description	interpro_ID	interpro_Description	eggNOG_ID	eggNOG_Description	GO_term	GO_class	GO_description	KEGG_KO	KEGG_pathway	KEGG_description
Solyc12g044190.3	Solyc12g044190.3	49.48137270036487	45.73841840692053	48.59928618310875	1.373342810114183	1.6672070884752483	1.5160993838021113	6.31367427631979	4.72418622910879	7.678391e-12	5.946192e-08	A0A3Q7J9S8	NB-ARC domain-containing protein	-	-	PF00931	NB-ARC domain	IPR002182;IPR027417;IPR032675;IPR042197	NB-ARC;P-loop containing nucleoside triphosphate hydrolase;Leucine-rich repeat domain superfamily;Apoptotic protease-activating factors, helical domain	-	-	GO:0098542;GO:0043531	biological_process;molecular_function	Reactions triggered in response to the presence of another organism that act to protect the cell or organism from damage caused by that organism.;Binding to ADP, adenosine 5'-diphosphate.	-	-	-
Solyc01g099630.4	Solyc01g099630.4	164.68782663639035	136.06784232241702	150.7524246949506	8.588306948195777	9.384547440326306	8.730411034908016	6.60019595876695	3.82423054655736	2.849837e-11	7.119342e-08	Q40144	Probable xyloglucan endotransglucosylase/hydrolase 1	NP_001233858.1	probable xyloglucan endotransglucosylase/hydrolase 1 precursor	PF00722;PF06955	Glycosyl hydrolases family 16;Xyloglucan endo-transglycosylase (XET) C-terminus	IPR000757;IPR008263;IPR008264;IPR010713;IPR013320;IPR016455;IPR044791	Glycoside hydrolase family 16;Glycoside hydrolase, family 16, active site;Beta-glucanase;Xyloglucan endo-transglycosylase, C-terminal;Concanavalin A-like lectin/glucanase domain superfamily;Xyloglucan endotransglucosylase/hydrolase;Beta-glucanase/XTH	ENOG502QQ71	-	GO:0042546;GO:0016740;GO:0016798;GO:0048046;GO:0030247;GO:0016762;GO:0004553;GO:0071555;GO:0010411	biological_process;molecular_function;molecular_function;cellular_component;molecular_function;molecular_function;molecular_function;biological_process;biological_process	A cellular process that results in the biosynthesis of constituent macromolecules, assembly, and arrangement of constituent parts of a cell wall. Includes biosynthesis of constituent macromolecules, such as proteins and polysaccharides, and those macromolecular modifications that are involved in synthesis or assembly of the cellular component. A cell wall is the rigid or semi-rigid envelope lying…	K08235	-	-
Solyc02g077240.4	Solyc02g077240.4	142.4103534367755	127.22217704006876	132.10958244835925	10.11362712554032	10.04027149705091	10.924146960422576	7.19910899544299	3.43784660259059	1.065313e-10	1.15931e-07	A0A3Q7IJU2	pyruvate decarboxylase	XP_004249069.1	pyruvate decarboxylase 1-like	PF02775;PF00205;PF02776	Thiamine pyrophosphate enzyme, C-terminal TPP binding domain;Thiamine pyrophosphate enzyme, central domain;Thiamine pyrophosphate enzyme, N-terminal TPP binding domain	IPR011766;IPR012000;IPR012001;IPR012110;IPR029035;IPR029061;IPR047213;IPR047214	Thiamine pyrophosphate enzyme, TPP-binding;Thiamine pyrophosphate enzyme, central domain;Thiamine pyrophosphate enzyme, N-terminal TPP-binding domain;Pyruvate decarboxylase/indolepyruvate decarboxylase-like;DHS-like NAD/FAD-binding domain superfamily;Thiamin diphosphate-binding fold;Pyruvate decarboxylase/indolepyruvate decarboxylase-like, pyrimidine-binding domain;Pyruvate decarboxylase/indolepy…	-	-	GO:0005829;GO:0016831;GO:0004737;GO:0000949;GO:0000287;GO:0046872;GO:0030976	cellular_component;molecular_function;molecular_function;biological_process;molecular_function;molecular_function;molecular_function	The part of the cytoplasm that does not contain organelles but which does contain other particulate matter, such as protein complexes.;Catalysis of the nonhydrolytic addition or removal of a carboxyl group to or from a compound.;Catalysis of the reaction: a 2-oxo acid = an aldehyde + CO2.;The chemical reactions and pathways involving the catabolism of aromatic amino acids to produce aromatic alco…	K01568	ko01100;ko01130;ko00010;ko01110	Metabolic pathways;Biosynthesis of antibiotics;Glycolysis / Gluconeogenesis;Biosynthesis of secondary metabolites
Solyc06g059740.4	Solyc06g059740.4	305.05490149198766	294.0702505407068	265.8777081283938	19.33922631103335	18.707600343695628	18.13592183171985	7.99336701758052	3.6901260965875	1.553173e-10	1.305874e-07	P28032	Alcohol dehydrogenase 2	NP_001234099.1	alcohol dehydrogenase 2	PF08240;PF00107	Alcohol dehydrogenase GroES-like domain;Zinc-binding dehydrogenase	IPR002328;IPR011032;IPR013149;IPR013154;IPR036291	Alcohol dehydrogenase, zinc-type, conserved site;GroES-like superfamily;Alcohol dehydrogenase-like, C-terminal;Alcohol dehydrogenase-like, N-terminal;NAD(P)-binding domain superfamily	KOG0022	Alcohol dehydrogenase, class III	GO:0016491;GO:0046872;GO:0004022;GO:0004024;GO:0046294;GO:0051903;GO:0008270;GO:0005829;GO:0005737	molecular_function;molecular_function;molecular_function;molecular_function;biological_process;molecular_function;molecular_function;cellular_component;cellular_component	Catalysis of an oxidation-reduction (redox) reaction, a reversible chemical reaction in which the oxidation state of an atom or atoms within a molecule is altered. One substrate acts as a hydrogen or electron donor and becomes oxidized, while the other acts as hydrogen or electron acceptor and becomes reduced.;Binding to a metal ion.;Catalysis of the reaction: an alcohol + NAD+ = an aldehyde or k…	K18857	ko00010;ko01110;ko01100;ko00071;ko00592;ko01120;ko00350	Glycolysis / Gluconeogenesis;Biosynthesis of secondary metabolites;Metabolic pathways;Fatty acid degradation;alpha-Linolenic acid metabolism;Microbial metabolism in diverse environments;Tyrosine metabolism
Solyc12g009300.3	Solyc12g009300.3	69.90494031177924	70.51580882347976	66.4371851419607	7.387884240398228	7.29195760211937	7.287367888642229	6.81049177470723	2.98289859484883	1.951832e-10	1.305874e-07	P49037	Sucrose synthase	NP_001234655.2	sucrose synthase	PF00534;PF00862	Glycosyl transferases group 1;Sucrose synthase	IPR000368;IPR001296;IPR012820	Sucrose synthase;Glycosyl transferase, family 1;Sucrose synthase, plant/cyanobacteria	KOG0853	Glycosyltransferase	GO:0016757;GO:0016157;GO:0005985	molecular_function;molecular_function;biological_process	Catalysis of the transfer of a glycosyl group from one compound (donor) to another (acceptor).;Catalysis of the reaction: UDP-glucose + D-fructose = UDP + sucrose.;The chemical reactions and pathways involving sucrose, the disaccharide fructofuranosyl-glucopyranoside.	K00695	ko00500;ko01100	Starch and sucrose metabolism;Metabolic pathways
Solyc06g051960.3	Solyc06g051960.3	53.06019540026042	46.47265666735601	48.03816809223776	5.985854855754937	6.716206096621654	5.699965221420321	5.82269114106071	2.7486940361928	2.356687e-10	1.305874e-07	Q43143	Pectinesterase/pectinesterase inhibitor U1	NP_001233857.2	pectinesterase/pectinesterase inhibitor U1 precursor	PF01095;PF04043	Pectinesterase;Plant invertase/pectin methylesterase inhibitor	IPR000070;IPR006501;IPR011050;IPR012334;IPR018040;IPR033131;IPR035513	Pectinesterase, catalytic;Pectinesterase inhibitor domain;Pectin lyase fold/virulence factor;Pectin lyase fold;Pectinesterase, Tyr active site;Pectinesterase, Asp active site;Invertase/pectin methylesterase inhibitor domain superfamily	ENOG502QVK0	-	GO:0004857;GO:0016787;GO:0046910;GO:0005576;GO:0045490;GO:0042545;GO:0030599;GO:0071555	molecular_function;molecular_function;molecular_function;cellular_component;biological_process;biological_process;molecular_function;biological_process	Binds to and stops, prevents or reduces the activity of an enzyme.;Catalysis of the hydrolysis of various bonds, e.g. C-O, C-N, C-C, phosphoric anhydride bonds, etc.;Binds to and stops, prevents or reduces the activity of pectinesterase.;The space external to the outermost structure of a cell. For cells without external protective or external encapsulating structures this refers to space outside …	K01051	ko00040;ko02020;ko01100	Pentose and glucuronate interconversions;Two-component system;Metabolic pathways
Solyc04g007790.3	Solyc04g007790.3	832.5142768069999	779.3050062252742	888.4423799773275	53.29595799478236	56.59900625979736	58.56414683641698	8.41426931819688	3.63987813590021	3.494541e-10	1.571825e-07	A0A3Q7FXR7	Bet v I/Major latex protein domain-containing protein	XP_004237021.1	kirola	PF00407	Pathogenesis-related protein Bet v 1 family	IPR000916;IPR023393	Bet v I/Major latex protein;START-like domain superfamily	-	-	GO:0006952	biological_process	Reactions, triggered in response to the presence of a foreign body or the occurrence of an injury, which result in restriction of damage to the organism attacked or prevention/recovery from the infection caused by the attack.	-	-	-
Solyc09g083290.3	Solyc09g083290.3	29.081207302308524	30.221153534663102	25.45455580894104	1.0296081045199057	1.350797706831781	1.2505123296910063	3.92614834179909	4.27837021558403	3.881691e-10	1.613504e-07	G9HPW2	Auxin-responsive protein	NP_001266070.1	IAA14	PF02309	AUX/IAA family	IPR000270;IPR003311;IPR033389	PB1 domain;AUX/IAA protein;AUX/IAA domain	ENOG502QPNB	-	GO:0009734;GO:0006355;GO:0005634	biological_process;biological_process;cellular_component	The series of molecular signals generated by the binding of the plant hormone auxin to a receptor, and ending with modulation of a downstream cellular process, e.g. transcription.;Any process that modulates the frequency, rate or extent of cellular DNA-templated transcription.;A membrane-bounded organelle of eukaryotic cells in which chromosomes are housed and replicated. In most cells, the nucle…	K14484	ko04075	Plant hormone signal transduction
Solyc04g078110.1	Solyc04g078110.1	53.31544784210104	47.1310372691063	53.36664933536519	6.783900119911779	6.867031091429201	6.874828757319092	5.97433714894505	2.65273368949924	4.351978e-10	1.693163e-07	O82777	Subtilisin-like protease SBT3	NP_001234774.1	subtilisin-like protease precursor	PF17766;PF05922;PF00082	Fibronectin type-III domain;Peptidase inhibitor I9;Subtilase family	IPR000209;IPR010259;IPR015500;IPR023828;IPR034197;IPR036852;IPR037045;IPR041469;IPR045051	Peptidase S8/S53 domain;Peptidase S8 propeptide/proteinase inhibitor I9;Peptidase S8, subtilisin-related;Peptidase S8, subtilisin, Ser-active site;Cucumisin-like catalytic domain;Peptidase S8/S53 domain superfamily;Peptidase S8 propeptide/proteinase inhibitor I9 superfamily;Subtilisin-like protease, fibronectin type-III domain;Subtilisin-like protease	ENOG502QT5U	-	GO:1900367;GO:0005615;GO:0043171;GO:0008236;GO:1902066;GO:0042802;GO:0042803;GO:0010628;GO:0097264;GO:0005576;GO:0009827;GO:0006508;GO:0006952;GO:0004252;GO:0009611	biological_process;cellular_component;biological_process;molecular_function;biological_process;molecular_function;molecular_function;biological_process;biological_process;cellular_component;biological_process;biological_process;biological_process;molecular_function;biological_process	Any process that activates or increases the frequency, rate or extent of defense response to insect.;That part of a multicellular organism outside the cells proper, usually taken to be outside the plasma membranes, and occupied by fluid.;The chemical reactions and pathways resulting in the breakdown of peptides, compounds of 2 or more (but usually less than 100) amino acids where the alpha carbox…	-	-	-
Solyc07g063350.3	Solyc07g063350.3	12.392888594808015	12.4601356918601	12.910481003417036	0.965279536158688	1.013533143537163	1.126528793257101	4.61488943045835	3.35401364904751	4.365172e-10	1.693163e-07	A0A3Q7HH53	COP1-interacting protein 7	XP_019070534.1;XP_010324356.1	COP1-interacting protein 7;COP1-interacting protein 7	-	-	-	-	-	-	GO:0009416;GO:0045893	biological_process;biological_process	Any process that results in a change in state or activity of a cell or an organism (in terms of movement, secretion, enzyme production, gene expression, etc.) as a result of a light stimulus, electromagnetic radiation of wavelengths classified as infrared, visible or ultraviolet light.;Any process that activates or increases the frequency, rate or extent of cellular DNA-templated transcription.	-	-	-
Solyc11g010130.3	Solyc11g010130.3	52.34976075013683	45.27129565180409	51.214126794233735	1.7430841323153463	2.565728430848192	1.7132551747323523	4.61418199247549	4.35468518324262	5.320085e-10	1.810135e-07	A1IKU3	SNF1-related kinase	XP_010319113.1;NP_001234353.1	-;SNF1-related kinase	PF00069	Protein kinase domain	IPR000719;IPR008271;IPR011009;IPR017441	Protein kinase domain;Serine/threonine-protein kinase, active site;Protein kinase-like domain superfamily;Protein kinase, ATP binding site	KOG0583	Serine/threonine protein kinase	GO:0004674;GO:0005524;GO:0004672	molecular_function;molecular_function;molecular_function	Catalysis of the reactions: ATP + protein serine = ADP + protein serine phosphate, and ATP + protein threonine = ADP + protein threonine phosphate.;Binding to ATP, adenosine 5'-triphosphate, a universally important coenzyme and enzyme regulator.;Catalysis of the phosphorylation of an amino acid residue in a protein, usually according to the reaction: a protein + ATP = a phosphoprotein + ADP.	K14498	ko04016;ko04075	MAPK signaling pathway - plant;Plant hormone signal transduction
Solyc02g078040.3	Solyc02g078040.3	18.084353959525423	15.058483052318346	17.520290676645093	0.6344377082188414	0.5387648278354417	0.5907606975415062	3.06490800845198	4.59447848268246	5.876049e-10	1.852335e-07	A0A3Q7FQN2	Pistil-specific extensin-like protein	XP_004232891.1	pistil-specific extensin-like protein	PF01190	Pollen protein Ole e 1 like	IPR003882	Pistil-specific extensin-like protein	-	-	GO:0071944	cellular_component	The broad region around and including the plasma membrane of a cell, encompassing the cell cortex (inside the cell), the plasma membrane, and any external encapsulating structures.	-	-	-
Solyc01g108710.3	Solyc01g108710.3	102.9542091169021	109.5177753024162	96.27446171821477	7.521470432520635	6.573530955884329	6.128206802622593	4.42985263443287	3.68393868595362	7.686646e-10	2.146511e-07	A0A3Q7ESQ4	Uncharacterized protein	-	-	-	-	-	-	-	-	GO:0016020	cellular_component	A lipid bilayer along with all the proteins and protein complexes embedded in it and attached to it.	-	-	-
Solyc01g065700.3	Solyc01g065700.3	9.156297271916522	8.463224347839155	8.976011490433349	0.1668093724183893	0.147320788966385	0.2485209688636146	2.67198448685967	5.31008192681197	1.02404e-09	2.500004e-07	A0A3Q7EFD3	PPM-type phosphatase domain-containing protein	XP_010321558.1;XP_004229276.1	probable protein phosphatase 2C 34;probable protein phosphatase 2C 34	PF00481	Protein phosphatase 2C	IPR001932;IPR015655;IPR036457	PPM-type phosphatase-like domain;Protein phosphatase 2C;PPM-type phosphatase-like domain superfamily	-	-	GO:0004722	molecular_function	Catalysis of the reaction: protein serine phosphate + H2O = protein serine + phosphate, and protein threonine phosphate + H2O = protein threonine + phosphate.	-	-	-
Solyc03g083560.1	Solyc03g083560.1	34.62639449705205	27.678444735953494	26.29002952664101	1.875890542396516	2.208970001415967	2.1834342264446143	3.96294157632701	3.55816883390218	1.027207e-09	2.500004e-07	A0A3Q7FN83	Protein EXORDIUM-like 3	XP_004234941.1	protein EXORDIUM-like 3	PF04674	Phosphate-induced protein 1 conserved region	IPR006766	Protein EXORDIUM-like	-	-	GO:0016020;GO:0005576	cellular_component;cellular_component	A lipid bilayer along with all the proteins and protein complexes embedded in it and attached to it.;The space external to the outermost structure of a cell. For cells without external protective or external encapsulating structures this refers to space outside of the plasma membrane. This term covers the host cell environment outside an intracellular parasite.	-	-	-
Solyc04g077755.1	Solyc04g077755.1	74.40701403579097	95.08113225734331	89.32798273018453	1.5746028898749822	2.2650571303581697	2.066011164848029	4.82355505691476	5.19049966103346	1.071084e-09	2.500004e-07	A0A3Q7G9R2	NADH dehydrogenase [ubiquinone] iron-sulfur protein 4, mitochondrial	-	-	PF04800	NADH dehydrogenase ubiquinone Fe-S protein 4	IPR006885;IPR038532	NADH dehydrogenase ubiquinone Fe-S protein 4 mitochondrial-like;NADH dehydrogenase ubiquinone Fe-S protein 4-like superfamily	-	-	GO:0005743;GO:0070469;GO:0022900;GO:0005739	cellular_component;cellular_component;biological_process;cellular_component	The inner, i.e. lumen-facing, lipid bilayer of the mitochondrial envelope. It is highly folded to form cristae.;The protein complexes that form the electron transport system (the respiratory chain), associated with a cell membrane, usually the plasma membrane (in prokaryotes) or the inner mitochondrial membrane (on eukaryotes). The respiratory chain complexes transfer electrons from an electron d…	-	-	-
Solyc05g005760.4	Solyc05g005760.4	26.83795278633269	26.929373986694745	28.485250782169917	3.6984938715039632	3.734018109940478	3.7970940904756607	4.93558902701116	2.62258307248888	1.145503e-09	2.505781e-07	A0A3Q7GCP5	NHL repeat-containing protein	-	-	PF01436	NHL repeat	IPR001258;IPR011042	NHL repeat;Six-bladed beta-propeller, TolB-like	-	-	GO:0016020	cellular_component	A lipid bilayer along with all the proteins and protein complexes embedded in it and attached to it.	-	-	-
Solyc01g007080.3	Solyc01g007080.3	5.099588762728846	4.834937034184255	5.162675000908904	0.0606430132240252	0.0669475013898966	0.0847021898189721	2.00432943416085	5.84763721047829	1.162835e-09	2.505781e-07	A0A3Q7E8K5	Aluminum-activated malate transporter	XP_004228909.1	aluminum-activated malate transporter 8-like	PF11744	Aluminium activated malate transporter	IPR020966	Aluminum-activated malate transporter	-	-	GO:0015743;GO:0016020;GO:0009705	biological_process;cellular_component;cellular_component	The directed movement of malate into, out of or within a cell, or between cells, by means of some agent such as a transporter or pore.;A lipid bilayer along with all the proteins and protein complexes embedded in it and attached to it.;The lipid bilayer surrounding a vacuole that retains the same shape regardless of cell cycle phase. The membrane separates its contents from the cytoplasm of the c…	-	-	-
Solyc07g018070.4	Solyc07g018070.4	5.166763465771936	4.530744619730935	4.60031181261967	0.3190634561851525	0.3690065303391279	0.2829504397120451	2.97479457760927	3.61241528259434	1.196834e-09	2.522979e-07	A0A3Q7I2N2	Clp R domain-containing protein	XP_004242919.1	protein SMAX1-LIKE 4	PF02861	Clp amino terminal domain, pathogenicity island component	IPR004176;IPR027417;IPR036628	Clp, repeat (R) domain;P-loop containing nucleoside triphosphate hydrolase;Clp, N-terminal domain superfamily	-	-	-	-	-	-	-	-
Solyc11g071600.2	Solyc11g071600.2	12.547136574626576	10.835471097929142	11.791768903448554	2.0088095273260422	1.9970431085259557	1.9684484984670476	4.92788723645058	2.30408532378258	1.340866e-09	2.691355e-07	Q9FV23	Aldehyde oxidase	NP_001234456.1	aldehyde oxidase	PF01315;PF03450;PF00941;PF00111;PF01799;PF02738;PF20256	Aldehyde oxidase and xanthine dehydrogenase, a/b hammerhead domain;CO dehydrogenase flavoprotein C-terminal domain;FAD binding domain in molybdopterin dehydrogenase;2Fe-2S iron-sulfur cluster binding domain;[2Fe-2S] binding domain;Molybdopterin cofactor-binding domain;Molybdopterin cofactor-binding domain	IPR000674;IPR001041;IPR002346;IPR002888;IPR005107;IPR006058;IPR008274;IPR012675;IPR016166;IPR016167;IPR016169;IPR016208;IPR036010;IPR036318;IPR036683;IPR036856;IPR036884;IPR037165;IPR046867	Aldehyde oxidase/xanthine dehydrogenase, a/b hammerhead;2Fe-2S ferredoxin-type iron-sulfur binding domain;Molybdopterin dehydrogenase, FAD-binding;[2Fe-2S]-binding;CO dehydrogenase flavoprotein, C-terminal;2Fe-2S ferredoxin, iron-sulphur binding site;Aldehyde oxidase/xanthine dehydrogenase, first molybdopterin binding domain;Beta-grasp domain superfamily;FAD-binding domain, PCMH-type;FAD-binding,…	KOG0430	Xanthine dehydrogenase	GO:0009055;GO:0071949;GO:0004031;GO:0009820;GO:0005506;GO:0016491;GO:0046872;GO:0051537;GO:0009507;GO:0006124	molecular_function;molecular_function;molecular_function;biological_process;molecular_function;molecular_function;molecular_function;molecular_function;cellular_component;biological_process	A molecular function representing the directed movement of electrons from one molecular entity to another, typically mediated by electron carriers or acceptors, resulting in the transfer of energy and/or the reduction-oxidation (redox) transformation of chemical species. This activity is fundamental to various biological processes, including cellular respiration and photosynthesis, as well as num…	K09842	ko01110;ko01100;ko00906	Biosynthesis of secondary metabolites;Metabolic pathways;Carotenoid biosynthesis
Solyc08g077480.4	Solyc08g077480.4	51.40952750375546	52.10914124528173	39.45638622111812	3.024139880775379	3.1495580028155308	2.8159470382767737	4.3547566979411	3.7337605672551	1.877559e-09	3.168464e-07	A0A3Q7HSA9	FLZ-type domain-containing protein	XP_004245848.1	myb-like protein D	PF04570	zinc-finger of the FCS-type, C2-C2	IPR007650;IPR044533	Zf-FLZ domain;FCS-Like Zinc finger 1/2/3	-	-	-	-	-	-	-	-
Solyc12g038430.3	Solyc12g038430.3	17.957352936319683	21.59075081160755	21.52341071640038	0.6118554515147681	0.4142848031669017	0.3874184984297849	4.29411749211879	5.20075104437309	2.200894e-09	3.470256e-07	A0A3Q7JBF5	Uncharacterized protein	-	-	PF03004	Plant transposase (Ptta/En/Spm family)	IPR004252	Probable transposase, Ptta/En/Spm, plant	-	-	-	-	-	-	-	-
Solyc07g054760.1	Solyc07g054760.1	179.4880899565589	176.42985241046384	186.44075380640837	28.91997919527962	27.899751319967294	26.20121071733537	4.63954177201059	2.45723681710515	2.485644e-09	3.679892e-07	A0A3Q7HFT4	Wound induced protein	XP_004243310.1	uncharacterized protein LOC101254813	PF12609	Wound-induced protein	IPR022251	Protein of unknown function wound-induced	-	-	-	-	-	-	-	-
Solyc09g089740.3	Solyc09g089740.3	16.352377317111543	17.146339579807744	15.545502340718784	1.3981792862582725	1.1898081820514963	1.3832937335239173	3.24385	3.38158991080794	2.999069e-09	3.956731e-07	P10967	1-aminocyclopropane-1-carboxylate oxidase homolog	NP_001296142.1	1-aminocyclopropane-1-carboxylate oxidase homolog isoform 1	PF03171;PF14226	2OG-Fe(II) oxygenase superfamily;non-haem dioxygenase in morphine synthesis N-terminal	IPR005123;IPR026992;IPR027443;IPR044861	Oxoglutarate/iron-dependent dioxygenase;Non-haem dioxygenase N-terminal domain;Isopenicillin N synthase-like superfamily;Isopenicillin N synthase-like, Fe(2+) 2OG dioxygenase domain	KOG0143	Iron/ascorbate family oxidoreductases	GO:0002238;GO:0009805;GO:0016491;GO:0031418;GO:0046872;GO:0009835;GO:0016706;GO:0009693	biological_process;biological_process;molecular_function;molecular_function;molecular_function;biological_process;molecular_function;biological_process	Any process that results in a change in state or activity of an organism (in terms of movement, secretion, enzyme production, gene expression, etc.) as a result of a stimulus by molecules of fungal origin such as chito-octamer oligosaccharide.;The chemical reactions and pathways resulting in the formation of coumarins, a class of compounds derived from the phenylacrylic skeleton of cinnamic acids…	-	-	-
Solyc01g107890.3	Solyc01g107890.3	13.66679041122052	13.549865880109897	14.546093681160002	1.7032379453865625	1.5265864495016703	1.758711404314292	4.42858984494422	2.81846680028622	3.203151e-09	4.060256e-07	A0A3Q7ESI0	Filament-like plant protein 7	XP_004230764.1	filament-like plant protein 7	PF05911	Filament-like plant protein, long coiled-coil	IPR008587	Filament-like plant protein	-	-	-	-	-	-	-	-
Solyc11g066320.2	Solyc11g066320.2	55.01374544034755	45.41910547263996	51.24301773343542	10.522481627902083	11.038899118067402	10.804234879131108	5.80087404158102	1.97373358157881	3.592617e-09	4.300939e-07	A0A3Q7IYN1	Exostosin GT47 domain-containing protein	XP_004250976.2	probable glucuronoxylan glucuronosyltransferase IRX7	PF03016	Exostosin family	IPR004263;IPR040911	Exostosin-like;Exostosin, GT47 domain	-	-	GO:0016757;GO:0000139;GO:0006486;GO:0005794;GO:0010417;GO:0016020	molecular_function;cellular_component;biological_process;cellular_component;biological_process;cellular_component	Catalysis of the transfer of a glycosyl group from one compound (donor) to another (acceptor).;The lipid bilayer surrounding any of the compartments of the Golgi apparatus.;A protein modification process that results in the addition of a carbohydrate or carbohydrate derivative unit to a protein amino acid, e.g. the addition of glycan chains to proteins.;A membrane-bound cytoplasmic organelle of t…	K20889	-	-
Solyc08g079310.4	Solyc08g079310.4	17.984453265147124	17.496922993832005	18.66736055991068	3.183113615595823	3.081656902734585	2.924191521490032	4.5330329965638	2.30841636582077	3.735499e-09	4.390683e-07	A0A3Q7HTB0	Cytochrome P450	XP_010325460.1	geraniol 8-hydroxylase-like isoform X1	PF00067	Cytochrome P450	IPR001128;IPR002401;IPR017972;IPR036396	Cytochrome P450;Cytochrome P450, E-class, group I;Cytochrome P450, conserved site;Cytochrome P450 superfamily	-	-	GO:0020037;GO:0005506;GO:0004497;GO:0046872;GO:0016705	molecular_function;molecular_function;molecular_function;molecular_function;molecular_function	Binding to a heme, a compound composed of iron complexed in a porphyrin (tetrapyrrole) ring.;Binding to an iron (Fe) ion.;Catalysis of the incorporation of one atom from molecular oxygen into a compound and the reduction of the other atom of oxygen to water.;Binding to a metal ion.;Catalysis of an oxidation-reduction (redox) reaction in which hydrogen or electrons are transferred from each of two…	-	-	-
Solyc11g008140.3	Solyc11g008140.3	44.77367212582157	40.27693026916214	38.22333117962166	6.700777888270875	6.499591709722814	7.391374342276918	5.02345354285822	2.32750849602695	3.824201e-09	4.441111e-07	P24396	Probable pectate lyase P18	NP_001234029.2	probable pectate lyase P18 precursor	PF00544	Pectate lyase	IPR002022;IPR011050;IPR012334;IPR018082;IPR045032	Pectate lyase;Pectin lyase fold/virulence factor;Pectin lyase fold;AmbAllergen;Pectin lyase family	ENOG502QVCJ	-	GO:0046872;GO:0005576;GO:0030570;GO:0016829;GO:0045490	molecular_function;cellular_component;molecular_function;molecular_function;biological_process	Binding to a metal ion.;The space external to the outermost structure of a cell. For cells without external protective or external encapsulating structures this refers to space outside of the plasma membrane. This term covers the host cell environment outside an intracellular parasite.;Catalysis of the reaction: a pectate = a pectate + a pectate oligosaccharide with 4-(4-deoxy-alpha-D-galact-4-en…	K01728	ko01100;ko02024;ko00040	Metabolic pathways;Quorum sensing;Pentose and glucuronate interconversions
Solyc03g114530.4	Solyc03g114530.4	40.435597661251975	44.30531683562366	38.34961327147426	5.767095924259557	6.440850414908733	5.407620885150298	4.76040410523256	2.55187920293636	4.649809e-09	5.094824e-07	A0A3Q7FSK9	Strictosidine synthase conserved region domain-containing protein	-	-	PF20067;PF03088	Strictosidine synthase-like, N-terminal;Strictosidine synthase	IPR011042;IPR018119	Six-bladed beta-propeller, TolB-like;Strictosidine synthase, conserved region	-	-	GO:0005773;GO:0016844;GO:0009058;GO:0016787	cellular_component;molecular_function;biological_process;molecular_function	A closed structure, found only in eukaryotic cells, that is completely surrounded by unit membrane and contains liquid material. Cells contain one or several vacuoles, that may have different functions from each other. Vacuoles have a diverse array of functions. They can act as a storage organelle for nutrients or waste products, as a degradative compartment, as a cost-effective way of increasing…	-	-	-
Solyc04g080540.2	Solyc04g080540.2	336.0882544635611	293.49280864137825	272.67829302043657	41.65283838762156	50.74593943665041	39.333119792511226	7.07993811134771	2.52182344400383	5.009461e-09	5.157462e-07	K4BVD3	Uncharacterized protein	XP_004238295.1	uncharacterized protein LOC101245159	-	-	-	-	ENOG502S3N3	-	-	-	-	-	-	-
Solyc07g055460.3	Solyc07g055460.3	6.787364746256428	6.069834371919627	5.095825713068795	0.1034498460880431	0.1268939568828106	0.0642186537189592	2.06165674521912	5.59754741570524	5.234694e-09	5.287586e-07	K4CEE8	Beta-amyrin 28-monooxygenase	XP_004243906.1	beta-amyrin 28-monooxygenase-like	PF00067	Cytochrome P450	IPR001128;IPR002401;IPR017972;IPR036396	Cytochrome P450;Cytochrome P450, E-class, group I;Cytochrome P450, conserved site;Cytochrome P450 superfamily	KOG0157	Cytochrome P450 CYP4/CYP19/CYP26 subfamilies	GO:0046872;GO:0102373;GO:0016712;GO:0016705;GO:0020037;GO:0016125;GO:0005506;GO:0016020;GO:0004497;GO:0102374	molecular_function;molecular_function;molecular_function;molecular_function;molecular_function;biological_process;molecular_function;cellular_component;molecular_function;molecular_function	Binding to a metal ion.;Catalysis of the reaction: beta-amyrin + 3 O2 + 3 reduced [NADPH--hemoprotein reductase] = 4 H+ + 4 H2O + oleanolate + 3 oxidized [NADPH--hemoprotein reductase].;Catalysis of an oxidation-reduction (redox) reaction in which hydrogen or electrons are transferred from reduced flavin or flavoprotein and one other donor, and one atom of oxygen is incorporated into one donor.;C…	K20667	-	-
Solyc01g060200.3	Solyc01g060200.3	23.774306586148462	19.2331930505842	22.68743285133553	1.0805482356280869	1.4390331611888894	1.7248445926772502	3.40246470037359	3.69162133083997	5.317134e-09	5.31549e-07	A0A3Q7GL13	TRAM domain-containing protein	-	-	PF01612;PF05958	3'-5' exonuclease;tRNA (Uracil-5-)-methyltransferase	IPR002562;IPR002792;IPR004087;IPR004088;IPR010280;IPR012337;IPR012340;IPR029063;IPR030391;IPR036397;IPR036612	3'-5' exonuclease domain;TRAM domain;K Homology domain;K Homology domain, type 1;(Uracil-5)-methyltransferase family;Ribonuclease H-like superfamily;Nucleic acid-binding, OB-fold;S-adenosyl-L-methionine-dependent methyltransferase superfamily;RNA methyltransferase TrmA, conserved site;Ribonuclease H superfamily;K Homology domain, type 1 superfamily	-	-	GO:0009451;GO:0006139;GO:0008757;GO:0008173;GO:0008408;GO:0006396;GO:0008168;GO:0003723;GO:0032259	biological_process;biological_process;molecular_function;molecular_function;molecular_function;biological_process;molecular_function;molecular_function;biological_process	The covalent alteration of one or more nucleotides within an RNA molecule to produce an RNA molecule with a sequence that differs from that coded genetically.;Any cellular metabolic process involving nucleobases, nucleosides, nucleotides and nucleic acids.;Catalysis of the transfer of a methyl group from S-adenosyl-L-methionine to a substrate.;Catalysis of the transfer of a methyl group from a do…	-	-	-
Solyc06g074110.3	Solyc06g074110.3	10.011402402432472	10.550952572814923	12.309579977657068	0.8118372230809253	0.6593003131002744	0.6386452015382342	4.27251921487848	3.72050912716472	5.69679e-09	5.579977e-07	A0A3Q7GZP6	BHLH domain-containing protein	XP_004242114.1	transcription factor LHW isoform X1	PF14215	bHLH-MYC and R2R3-MYB transcription factors N-terminal	IPR011598;IPR025610;IPR043561	Myc-type, basic helix-loop-helix (bHLH) domain;Transcription factor MYC/MYB N-terminal;Transcription factor LHW-like	-	-	GO:0003700;GO:0006355;GO:0005634;GO:0046983	molecular_function;biological_process;cellular_component;molecular_function	A transcription regulator activity that modulates transcription of gene sets via selective and non-covalent binding to a specific double-stranded genomic DNA sequence (sometimes referred to as a motif) within a cis-regulatory region. Regulatory regions include promoters (proximal and distal) and enhancers. Genes are transcriptional units, and include bacterial operons.;Any process that modulates …	-	-	-
Solyc01g096880.4	Solyc01g096880.4	70.33058233376435	62.41858377437708	63.982302747442354	13.396213850970632	15.402839917851669	15.809499839906897	6.26131025065168	1.88702294323285	6.233299e-09	5.870294e-07	A0A3Q7ELZ5	Uncharacterized protein	-	-	PF00854	POT family	IPR000109;IPR018456;IPR036259	Proton-dependent oligopeptide transporter family;PTR2 family proton/oligopeptide symporter, conserved site;MFS transporter superfamily	-	-	GO:0022857;GO:0055085;GO:0006857;GO:0016020	molecular_function;biological_process;biological_process;cellular_component	Enables the transfer of a substance, usually a specific substance or a group of related substances, from one side of a membrane to the other.;The process in which a solute is transported across a lipid bilayer, from one side of a membrane to the other.;The directed movement of oligopeptides into, out of or within a cell, or between cells, by means of some agent such as a transporter or pore. Olig…	-	-	-
Solyc05g006550.4	Solyc05g006550.4	20.03706550444151	19.30207330270441	20.70456142983821	3.8483342744752047	4.080909653351189	4.2769623376826855	4.77275729636452	2.04716055649425	6.545304e-09	6.016426e-07	A0A3Q7GD33	TOG domain-containing protein	XP_004238736.1	TORTIFOLIA1-like protein 4	PF02985;PF13513	HEAT repeat;HEAT-like repeat	IPR000357;IPR011989;IPR016024;IPR021133;IPR033337	HEAT repeat;Armadillo-like helical;Armadillo-type fold;HEAT, type 2;MT-associated protein TORTIFOLIA1/SPIRAL2-like	-	-	GO:0008017;GO:0005874	molecular_function;cellular_component	Binding to a microtubule, a filament composed of tubulin monomers.;Any of the long, generally straight, hollow tubes of internal diameter 12-15 nm and external diameter 24 nm found in a wide variety of eukaryotic cells; each consists (usually) of 13 protofilaments of polymeric tubulin, staggered in such a manner that the tubulin monomers are arranged in a helical pattern on the microtubular surfa…	-	-	-
Solyc05g007420.2	Solyc05g007420.2	52.4894625601312	43.0268606145477	50.969978740420494	6.619713481678944	7.889392398541551	8.152371504634921	4.94261953170982	2.43780756358583	6.813417e-09	6.146019e-07	G3BGW2	TCP transcription factor 23	NP_001234594.1;XP_010320551.1;XP_010320552.1;XP_010320553.1	TCP transcription factor 23;-;-;-	PF03634	TCP family transcription factor	IPR005333;IPR017887	Transcription factor, TCP;Transcription factor TCP subgroup	ENOG502QU5R	-	GO:0003700;GO:0006355;GO:0043565;GO:0005634	molecular_function;biological_process;molecular_function;cellular_component	A transcription regulator activity that modulates transcription of gene sets via selective and non-covalent binding to a specific double-stranded genomic DNA sequence (sometimes referred to as a motif) within a cis-regulatory region. Regulatory regions include promoters (proximal and distal) and enhancers. Genes are transcriptional units, and include bacterial operons.;Any process that modulates …	-	-	-
Solyc07g009380.4	Solyc07g009380.4	213.60208486694253	150.53574017915156	159.0382696771036	10.301047114744732	14.875430662764268	10.754538154976007	6.76524805075047	3.60364026359223	7.110194e-09	6.384032e-07	Q40144	Probable xyloglucan endotransglucosylase/hydrolase 1	NP_001233858.1	probable xyloglucan endotransglucosylase/hydrolase 1 precursor	PF00722;PF06955	Glycosyl hydrolases family 16;Xyloglucan endo-transglycosylase (XET) C-terminus	IPR000757;IPR008263;IPR008264;IPR010713;IPR013320;IPR016455;IPR044791	Glycoside hydrolase family 16;Glycoside hydrolase, family 16, active site;Beta-glucanase;Xyloglucan endo-transglycosylase, C-terminal;Concanavalin A-like lectin/glucanase domain superfamily;Xyloglucan endotransglucosylase/hydrolase;Beta-glucanase/XTH	ENOG502QQ71	-	GO:0042546;GO:0016740;GO:0016798;GO:0048046;GO:0030247;GO:0016762;GO:0004553;GO:0071555;GO:0010411	biological_process;molecular_function;molecular_function;cellular_component;molecular_function;molecular_function;molecular_function;biological_process;biological_process	A cellular process that results in the biosynthesis of constituent macromolecules, assembly, and arrangement of constituent parts of a cell wall. Includes biosynthesis of constituent macromolecules, such as proteins and polysaccharides, and those macromolecular modifications that are involved in synthesis or assembly of the cellular component. A cell wall is the rigid or semi-rigid envelope lying…	K08235	-	-
Solyc11g042710.3	Solyc11g042710.3	26.987234304790817	20.63743686452673	27.64938635421024	0.4263387596355717	0.6275482958568088	0.297741030878811	2.50092855334811	5.47809357442058	7.158477e-09	6.397766e-07	A0A3Q7IWQ7	Uncharacterized protein	-	-	PF00106	short chain dehydrogenase	IPR002347;IPR036291	Short-chain dehydrogenase/reductase SDR;NAD(P)-binding domain superfamily	-	-	-	-	-	-	-	-
Solyc06g082910.3	Solyc06g082910.3	14.610872336509546	13.125111091824	12.831625652702876	2.758282581278624	3.3833727567027445	2.9894402494296783	4.69124555506711	1.89581643259005	9.024728e-09	7.512722e-07	A0A3Q7H1F1	Formin-like protein	XP_004242448.1	formin-like protein 1	PF02181	Formin Homology 2 Domain	IPR015425;IPR027643;IPR042201	Formin, FH2 domain;Formin-like family, plant;Formin, FH2 domain superfamily	-	-	GO:0045010;GO:0030036;GO:0051015;GO:0016020	biological_process;biological_process;molecular_function;cellular_component	The initial step in the formation of an actin filament, in which actin monomers combine to form a new filament. Nucleation is slow relative to the subsequent addition of more monomers to extend the filament.;A process that is carried out at the cellular level which results in the assembly, arrangement of constituent parts, or disassembly of cytoskeletal structures comprising actin filaments and t…	-	-	-
Solyc08g082160.3	Solyc08g082160.3	21.60725611222992	22.206431787079545	22.199134922918542	1.5484945515065576	1.8804247874671596	2.2349303166909498	2.86448873080002	3.28685533380628	9.126711e-09	7.56425e-07	A0A3Q7HUC6	Inhibitor I9 domain-containing protein	-	-	-	-	-	-	-	-	-	-	-	-	-	-
Solyc04g077490.3	Solyc04g077490.3	10.59280393200753	9.960378812716304	10.210337010208562	1.8434014742676603	2.229970186858645	2.1308213535182383	3.78015288535053	2.05452881160496	1.006223e-08	8.030738e-07	A0A060PVV0	AINTEGUMENTA homolog	NP_001287930.1	AP2-like ethylene-responsive transcription factor ANT-like	PF00847	AP2 domain	IPR001471;IPR016177;IPR036955	AP2/ERF domain;DNA-binding domain superfamily;AP2/ERF domain superfamily	-	-	GO:0003700;GO:0006355;GO:0006952;GO:0005634;GO:0003677	molecular_function;biological_process;biological_process;cellular_component;molecular_function	A transcription regulator activity that modulates transcription of gene sets via selective and non-covalent binding to a specific double-stranded genomic DNA sequence (sometimes referred to as a motif) within a cis-regulatory region. Regulatory regions include promoters (proximal and distal) and enhancers. Genes are transcriptional units, and include bacterial operons.;Any process that modulates …	K09285	-	-
Solyc08g066490.3	Solyc08g066490.3	4.562808709102994	4.819091766715225	5.319396902961611	0.4773547578349206	0.5160021090667505	0.5139437727802076	3.09611159761291	3.03453938104618	1.021235e-08	8.037987e-07	Q8GUQ5	Brassinosteroid LRR receptor kinase	NP_001296180.1	brassinosteroid LRR receptor kinase precursor	PF20141;PF08263;PF00560;PF13855;PF00069	Brassinosteroid receptor island domain;Leucine rich repeat N-terminal domain;Leucine Rich Repeat;Leucine rich repeat;Protein kinase domain	IPR000719;IPR001611;IPR003591;IPR008271;IPR011009;IPR013210;IPR017441;IPR032675;IPR045381	Protein kinase domain;Leucine-rich repeat;Leucine-rich repeat, typical subtype;Serine/threonine-protein kinase, active site;Protein kinase-like domain superfamily;Leucine-rich repeat-containing N-terminal, plant-type;Protein kinase, ATP binding site;Leucine-rich repeat domain superfamily;Brassinosteroid receptor BRI1, island domain	ENOG502QRF2	-	GO:0005886;GO:0050832;GO:0004672;GO:0038023;GO:0009755;GO:0106310;GO:0009742;GO:0001578;GO:0005524;GO:0006952;GO:0009729;GO:0004674;GO:0005496;GO:0009647	cellular_component;biological_process;molecular_function;molecular_function;biological_process;molecular_function;biological_process;biological_process;molecular_function;biological_process;biological_process;molecular_function;molecular_function;biological_process	The membrane surrounding a cell that separates the cell from its external environment. It consists of a phospholipid bilayer and associated proteins.;Reactions triggered in response to the presence of a fungus that act to protect the cell or organism.;Catalysis of the phosphorylation of an amino acid residue in a protein, usually according to the reaction: a protein + ATP = a phosphoprotein + ADP…	K13415	ko04075	Plant hormone signal transduction
Solyc02g030170.4	Solyc02g030170.4	75.13655256495211	72.07619510599196	71.10411688069263	18.760015155710537	21.74797873199552	19.76870808618642	6.55105582656127	1.6050911520103	1.043839e-08	8.122611e-07	A0A3Q7EY91	FAD-binding PCMH-type domain-containing protein	-	-	PF01565	FAD binding domain	IPR006094;IPR016166;IPR016169;IPR036318;IPR040165	FAD linked oxidase, N-terminal;FAD-binding domain, PCMH-type;FAD-binding, type PCMH, subdomain 2;FAD-binding, type PCMH-like superfamily;Delta(24)-sterol reductase	-	-	GO:0071949;GO:0016628;GO:0016020;GO:0005737;GO:0008202;GO:0050614	molecular_function;molecular_function;cellular_component;cellular_component;biological_process;molecular_function	Binding to the oxidized form, FAD, of flavin-adenine dinucleotide, the coenzyme or the prosthetic group of various flavoprotein oxidoreductase enzymes.;Catalysis of an oxidation-reduction (redox) reaction in which a CH-CH group acts as a hydrogen or electron donor and reduces NAD or NADP.;A lipid bilayer along with all the proteins and protein complexes embedded in it and attached to it.;The cont…	-	-	-
Solyc08g077060.3	Solyc08g077060.3	13.891187489424278	13.289613024442282	12.27352924744381	1.947710895312812	2.0950629846720594	1.8601265215146816	2.84444910638774	2.48246534785624	1.1108e-08	8.285716e-07	A0A3Q7HU07	Zinc finger LSD1-type domain-containing protein	XP_004245885.1	protein LOL1 isoform X2	PF06943	LSD1 zinc finger	IPR005735;IPR036280;IPR040319	Zinc finger, LSD1-type;Multiheme cytochrome superfamily;LSD1-like	-	-	-	-	-	-	-	-
Solyc06g064940.3	Solyc06g064940.3	99.50858434019544	97.91598517956405	96.9011092575254	24.264843728722585	24.04237662112944	24.857701827361364	7.09966328249264	1.75532891580571	1.162009e-08	8.47218e-07	A0A3Q7GYN8	Patellin-3	NP_001309129.1	patellin-3-like	PF00650;PF03765	CRAL/TRIO domain;CRAL/TRIO, N-terminal domain	IPR001251;IPR009038;IPR011074;IPR036273;IPR036598;IPR036865;IPR044834	CRAL-TRIO lipid binding domain;GOLD domain;CRAL/TRIO, N-terminal domain;CRAL/TRIO, N-terminal domain superfamily;GOLD domain superfamily;CRAL-TRIO lipid binding domain superfamily;Patellin	-	-	GO:0008289;GO:0051301	molecular_function;biological_process	Binding to a lipid.;The process resulting in division and partitioning of components of a cell to form more cells; may or may not be accompanied by the physical separation of a cell into distinct, individually membrane-bounded daughter cells.	-	-	-
Solyc04g008850.1	Solyc04g008850.1	13.082406556692847	11.436579595758566	11.891875521616658	1.1626613257561738	1.006692057936964	0.7005184809843137	3.16574440349041	3.4111976316469	1.172196e-08	8.482673e-07	A0A3Q7FYA7	Peptidase A1 domain-containing protein	XP_004236867.1	protein ASPARTIC PROTEASE IN GUARD CELL 2-like	PF14541;PF14543	Xylanase inhibitor C-terminal;Xylanase inhibitor N-terminal	IPR001461;IPR021109;IPR032799;IPR032861;IPR033121;IPR033873	Aspartic peptidase A1 family;Aspartic peptidase domain superfamily;Xylanase inhibitor, C-terminal;Xylanase inhibitor, N-terminal;Peptidase family A1 domain;CND41-like	-	-	GO:0006508;GO:0004190	biological_process;molecular_function	The hydrolysis of proteins into smaller polypeptides and/or amino acids by cleavage of their peptide bonds.;Catalysis of the hydrolysis of internal, alpha-peptide bonds in a polypeptide chain by a mechanism in which a water molecule bound by the side chains of aspartic residues at the active center acts as a nucleophile.	-	-	-
Solyc09g007360.3	Solyc09g007360.3	11.346610337902346	11.923225037553747	12.773914304330694	1.6965418342087353	1.7324467973798918	1.9154416534313865	3.93404968808807	2.50568178507355	1.252467e-08	8.930274e-07	A0A3Q7HVU3	40S ribosomal protein S23	-	-	PF00164	Ribosomal protein S12/S23	IPR005680;IPR006032;IPR012340;IPR029688	Small ribosomal subunit protein uS12, eukaryotic/archaeal;Small ribosomal subunit protein uS12;Nucleic acid-binding, OB-fold;Interactor of constitutive active ROPs	-	-	GO:0006412;GO:0003735;GO:0015935;GO:0009507;GO:0005840	biological_process;molecular_function;cellular_component;cellular_component;cellular_component	The cellular metabolic process in which a protein is formed, using the sequence of a mature mRNA or circRNA molecule to specify the sequence of amino acids in a polypeptide chain. Translation is mediated by the ribosome, and begins with the formation of a ternary complex between aminoacylated initiator methionine tRNA, GTP, and initiation factor 2, which subsequently associates with the small sub…	-	-	-
Solyc09g082980.3	Solyc09g082980.3	24.83225753887626	20.69729257925222	22.50963044418435	5.327295664321364	6.089306292049535	5.575125975995967	4.82392175484753	1.74642939398907	1.272407e-08	9.00623e-07	A0A3Q7J2G9	Uncharacterized protein	XP_004247620.1	uncharacterized protein LOC101261455	PF04720	PDDEXK-like family of unknown function	IPR006502	Protein of unknown function PDDEXK-like	-	-	-	-	-	-	-	-
Solyc07g054740.3	Solyc07g054740.3	17.619277083165883	16.605154769054614	17.357014517736825	3.433618353340628	3.1811138697072896	3.31007912261661	3.58528240162834	2.12824959149393	1.285082e-08	9.062864e-07	A0A3Q7HFT0	MSP domain-containing protein	XP_004243312.1	vesicle-associated protein 4-2	PF00635	MSP (Major sperm protein) domain	IPR000535;IPR008962;IPR013783;IPR016763	Major sperm protein (MSP) domain;PapD-like superfamily;Immunoglobulin-like fold;Vesicle-associated membrane-protein-associated protein	-	-	GO:0005886;GO:0061817;GO:0005789;GO:0090158	cellular_component;biological_process;cellular_component;biological_process	The membrane surrounding a cell that separates the cell from its external environment. It consists of a phospholipid bilayer and associated proteins.;The attachment of an endoplasmic reticulum membrane to the plasma membrane via molecular tethers.;The lipid bilayer surrounding the endoplasmic reticulum.;A process that is carried out at the cellular level which results in the assembly, arrangement…	-	-	-
Solyc08g007060.4	Solyc08g007060.4	10.546763906558978	10.37091211935495	10.081211083695054	1.9129416323325448	2.2779099207093942	1.8412897972461784	3.76104144952594	2.10481059867728	1.320727e-08	9.171974e-07	A0A3Q7HK53	Uncharacterized protein	-	-	PF00854	POT family	IPR000109;IPR036259	Proton-dependent oligopeptide transporter family;MFS transporter superfamily	-	-	GO:0022857;GO:0055085;GO:0016020	molecular_function;biological_process;cellular_component	Enables the transfer of a substance, usually a specific substance or a group of related substances, from one side of a membrane to the other.;The process in which a solute is transported across a lipid bilayer, from one side of a membrane to the other.;A lipid bilayer along with all the proteins and protein complexes embedded in it and attached to it.	-	-	-
Solyc10g009150.3	Solyc10g009150.3	9.811052536190171	11.869898327309492	10.776317419786787	0.4559456179435975	0.431439453401556	0.3639057044074357	2.04090030735526	4.4292068251962	1.376326e-08	9.268215e-07	A0A3Q7J762	Organ-specific protein S2	XP_004248104.1	organ-specific protein S2	PF10950	Organ specific protein	IPR024489	Organ specific protein	-	-	-	-	-	-	-	-
Solyc06g009190.4	Solyc06g009190.4	8.856487660206422	7.080742254408668	7.391011876307297	1.1948270297788854	1.3283969540975118	1.1835859255378651	3.06846751257151	2.39394115377228	1.499103e-08	9.659004e-07	Q43143	Pectinesterase/pectinesterase inhibitor U1	NP_001233857.2	pectinesterase/pectinesterase inhibitor U1 precursor	PF01095;PF04043	Pectinesterase;Plant invertase/pectin methylesterase inhibitor	IPR000070;IPR006501;IPR011050;IPR012334;IPR018040;IPR033131;IPR035513	Pectinesterase, catalytic;Pectinesterase inhibitor domain;Pectin lyase fold/virulence factor;Pectin lyase fold;Pectinesterase, Tyr active site;Pectinesterase, Asp active site;Invertase/pectin methylesterase inhibitor domain superfamily	ENOG502QVK0	-	GO:0004857;GO:0016787;GO:0046910;GO:0005576;GO:0045490;GO:0042545;GO:0030599;GO:0071555	molecular_function;molecular_function;molecular_function;cellular_component;biological_process;biological_process;molecular_function;biological_process	Binds to and stops, prevents or reduces the activity of an enzyme.;Catalysis of the hydrolysis of various bonds, e.g. C-O, C-N, C-C, phosphoric anhydride bonds, etc.;Binds to and stops, prevents or reduces the activity of pectinesterase.;The space external to the outermost structure of a cell. For cells without external protective or external encapsulating structures this refers to space outside …	K01051	ko00040;ko02020;ko01100	Pentose and glucuronate interconversions;Two-component system;Metabolic pathways
Solyc09g082830.4	Solyc09g082830.4	33.62819260083651	32.572288701615804	32.41224728881356	9.043589181215188	8.715228607025457	8.179244382542523	6.08172902854647	1.67386039631406	1.509496e-08	9.693762e-07	A0A3Q7I7U8	Uncharacterized protein	-	-	PF08699;PF16488;PF16487;PF16486;PF02170;PF02171	Argonaute linker 1 domain;Argonaute linker 2 domain;Mid domain of argonaute;N-terminal domain of argonaute;PAZ domain;Piwi domain	IPR003100;IPR003165;IPR012337;IPR014811;IPR032472;IPR032473;IPR032474;IPR036085;IPR036397;IPR045246	PAZ domain;Piwi domain;Ribonuclease H-like superfamily;Argonaute, linker 1 domain;Argonaute linker 2 domain;Protein argonaute, Mid domain;Protein argonaute, N-terminal;PAZ domain superfamily;Ribonuclease H superfamily;Argonaute-like, PIWI domain	-	-	GO:0004521;GO:1990904;GO:0005737;GO:0051607;GO:0005634;GO:0003723;GO:0031047	molecular_function;cellular_component;cellular_component;biological_process;cellular_component;molecular_function;biological_process	Catalysis of the hydrolysis of ester linkages within ribonucleic acid by creating internal breaks.;A macromolecular complex that contains both RNA and protein molecules.;The contents of a cell excluding the plasma membrane and nucleus, but including other subcellular structures.;Reactions triggered in response to the presence of a virus that act to protect the cell or organism.;A membrane-bounded…	-	-	-
Solyc12g014490.3	Solyc12g014490.3	32.76201155834729	35.841826064698374	37.452396383438426	5.577742114697466	4.897896993598997	5.438948457123094	5.30737429677939	2.48874547541736	1.529553e-08	9.748703e-07	A0A3Q7J5F0	Uncharacterized protein	-	-	PF03999	Microtubule associated protein (MAP65/ASE1 family)	IPR007145	Microtubule-associated protein, MAP65/Ase1/PRC1	-	-	GO:0005819;GO:0000226;GO:0005737;GO:0000911;GO:0008017	cellular_component;biological_process;cellular_component;biological_process;molecular_function	The array of microtubules and associated molecules that forms between opposite poles of a eukaryotic cell during mitosis or meiosis and serves to move the duplicated chromosomes apart.;A process that is carried out at the cellular level which results in the assembly, arrangement of constituent parts, or disassembly of cytoskeletal structures comprising microtubules and their associated proteins.;…	-	-	-
Solyc12g049616.1	Solyc12g049616.1	5.478529657932711	5.488643432058768	6.049841612054456	0.0697480548695588	0.0513327394982021	0.0649463438460862	1.01912114644997	6.13911427738598	1.541766e-08	9.748703e-07	A0A3Q7J9X0	Uncharacterized protein	-	-	-	-	-	-	-	-	-	-	-	-	-	-
Solyc01g100600.4	Solyc01g100600.4	13.531108247850616	13.546588710867194	13.731635719785944	0.49097721674161	1.062783404273628	0.7798894099148213	3.53584044875103	3.84116261045536	1.551163e-08	9.748703e-07	A0A1W5P464	Late termination	XP_004231294.1	acyl-CoA-binding domain-containing protein 5 isoform X1	PF01344;PF13415	Kelch motif;Galactose oxidase, central domain	IPR006652;IPR015915	Kelch repeat type 1;Kelch-type beta propeller	-	-	-	-	-	K20285	-	-
Solyc04g014510.3	Solyc04g014510.3	110.03754206005024	112.250622871699	116.52177366839504	25.36227339184164	27.655043078509166	28.26747111749173	6.6718792028282	1.80910751626067	1.559986e-08	9.752476e-07	A0A3Q7FXP7	Glutamine synthetase	NP_001309987.1	glutamine synthetase cytosolic isozyme 1-1	PF00120;PF03951	Glutamine synthetase, catalytic domain;Glutamine synthetase, beta-Grasp domain	IPR008146;IPR008147;IPR014746;IPR027302;IPR027303;IPR036651	Glutamine synthetase, catalytic domain;Glutamine synthetase, N-terminal domain;Glutamine synthetase/guanido kinase, catalytic domain;Glutamine synthetase, N-terminal conserved site;Glutamine synthetase, glycine-rich site;Glutamine synthetase, N-terminal domain superfamily	-	-	GO:0016874;GO:0005524;GO:0005737;GO:0004356;GO:0006542	molecular_function;molecular_function;cellular_component;molecular_function;biological_process	Catalysis of the joining of two molecules, or two groups within a single molecule, using the energy from the hydrolysis of ATP, a similar triphosphate, or a pH gradient.;Binding to ATP, adenosine 5'-triphosphate, a universally important coenzyme and enzyme regulator.;The contents of a cell excluding the plasma membrane and nucleus, but including other subcellular structures.;Catalysis of the reac…	K01915	ko01230;ko00630;ko04724;ko00250;ko00910;ko04727;ko00220;ko01100;ko04217;ko01120;ko02020	Biosynthesis of amino acids;Glyoxylate and dicarboxylate metabolism;Glutamatergic synapse;Alanine, aspartate and glutamate metabolism;Nitrogen metabolism;GABAergic synapse;Arginine biosynthesis;Metabolic pathways;Necroptosis;Microbial metabolism in diverse environments;Two-component system
Solyc06g076630.3	Solyc06g076630.3	23.91341114819897	22.314641307713227	23.43097187433903	4.532748067924635	5.671172329733591	5.179946470268186	4.02270367118051	1.92380249871406	1.759201e-08	1.051497e-06	P15004	Suberization-associated anionic peroxidase 2	NP_001295320.1	suberization-associated anionic peroxidase 2 precursor	PF00141	Peroxidase	IPR000823;IPR002016;IPR010255;IPR019793;IPR019794;IPR033905	Plant peroxidase;Haem peroxidase;Haem peroxidase superfamily;Peroxidases heam-ligand binding site;Peroxidase, active site;Secretory peroxidase	ENOG502QU1K	-	GO:0042744;GO:0046872;GO:0004601;GO:0098869;GO:0006979;GO:0140825;GO:0005576;GO:0020037	biological_process;molecular_function;molecular_function;biological_process;biological_process;molecular_function;cellular_component;molecular_function	The chemical reactions and pathways resulting in the breakdown of hydrogen peroxide (H2O2).;Binding to a metal ion.;Catalysis of the reaction: a donor + a peroxide = an oxidized donor + 2 H2O.;Any process carried out at the cellular level that reduces or removes the toxicity superoxide radicals or hydrogen peroxide.;Any process that results in a change in state or activity of a cell or an organis…	K00430	ko01100;ko01110;ko00940	Metabolic pathways;Biosynthesis of secondary metabolites;Phenylpropanoid biosynthesis
Solyc04g054500.3	Solyc04g054500.3	74.95070857386791	59.01381639513259	53.67540538301822	8.12682221950282	10.38827504737558	8.463474688824402	4.9549019340352	2.53652894572049	1.900456e-08	1.090457e-06	A0A3Q7G4T9	HMA domain-containing protein	NP_001308204.1	metal ion binding protein	PF00403	Heavy-metal-associated domain	IPR006121;IPR036163;IPR045181	Heavy metal-associated domain, HMA;Heavy metal-associated domain superfamily;Heavy metal binding protein HIPP-like	-	-	GO:0046872	molecular_function	Binding to a metal ion.	-	-	-
Solyc11g008680.2	Solyc11g008680.2	32.32851138822729	31.033802421492787	35.79451094295014	7.044265723167109	7.178392886307045	6.937734612224291	4.80004730717343	1.97818885308787	1.911591e-08	1.093611e-06	A0A3Q7IQC4	Acyl-[acyl-carrier-protein] desaturase	XP_004250077.1	stearoyl-	PF03405	Fatty acid desaturase	IPR005067;IPR005803;IPR009078;IPR012348	Fatty acid desaturase, type 2;Fatty acid desaturase type 2, conserved site;Ferritin-like superfamily;Ribonucleotide reductase-like	-	-	GO:0045300;GO:0009536;GO:0016491;GO:0046872;GO:0006633;GO:0009507;GO:0006631	molecular_function;cellular_component;molecular_function;molecular_function;biological_process;cellular_component;biological_process	Catalysis of the reaction: 2 H+ + O2 + octadecanoyl-[ACP] + 2 reduced [2Fe-2S]-[ferredoxin] = (9Z)-octadecenoyl-[ACP] + 2 H2O + 2 oxidized [2Fe-2S]-[ferredoxin].;Any member of a family of organelles found in the cytoplasm of plants and some protists, which are membrane-bounded and contain DNA. Plant plastids develop from a common type, the proplastid.;Catalysis of an oxidation-reduction (redox) r…	K03921	ko01100;ko00061;ko01212;ko01040	Metabolic pathways;Fatty acid biosynthesis;Fatty acid metabolism;Biosynthesis of unsaturated fatty acids
Solyc02g082140.3	Solyc02g082140.3	72.94624072202588	63.998552972352975	66.37720863735674	20.570422616480126	22.57424628630501	21.062891023883697	6.4315219825606	1.40905234280133	1.957251e-08	1.109728e-06	A0A3Q7F602	Glycosyltransferase family 92 protein	XP_004232603.1	galactan beta-1,4-galactosyltransferase GALS3	PF01697	Glycosyltransferase family 92	IPR008166	Glycosyltransferase family 92	-	-	GO:0016757;GO:0016020;GO:0005737;GO:0070085	molecular_function;cellular_component;cellular_component;biological_process	Catalysis of the transfer of a glycosyl group from one compound (donor) to another (acceptor).;A lipid bilayer along with all the proteins and protein complexes embedded in it and attached to it.;The contents of a cell excluding the plasma membrane and nucleus, but including other subcellular structures.;The covalent attachment and further modification of carbohydrate residues to a substrate mole…	-	-	-
Solyc06g035790.3	Solyc06g035790.3	5.337775259477218	5.178864526585268	4.887959837621192	0.6860700803933324	0.8144025637242857	0.8243077529049331	2.66839627701261	2.4692340483232	1.993562e-08	1.117432e-06	A0A3Q7GRK4	Methyltransferase	XP_004240739.1	probable methyltransferase PMT15	PF03141	Putative S-adenosyl-L-methionine-dependent methyltransferase	IPR004159;IPR029063	Putative S-adenosyl-L-methionine-dependent methyltransferase;S-adenosyl-L-methionine-dependent methyltransferase superfamily	-	-	GO:0008168;GO:0005737;GO:0016020;GO:0032259	molecular_function;cellular_component;cellular_component;biological_process	Catalysis of the transfer of a methyl group to an acceptor molecule.;The contents of a cell excluding the plasma membrane and nucleus, but including other subcellular structures.;A lipid bilayer along with all the proteins and protein complexes embedded in it and attached to it.;The process in which a methyl group is covalently attached to a molecule.	-	-	-
Solyc05g007180.3	Solyc05g007180.3	604.5892616881505	670.7969603698053	641.3482554711679	103.43559679794838	96.01845488140911	97.8936419707606	8.97955827946455	2.43723764082182	2.066094e-08	1.148133e-06	A0A3Q7GDG1	Homeobox-leucine zipper protein	NP_001296720.1	jasmoni isoform 2	PF02183;PF00046	Homeobox associated leucine zipper;Homeodomain	IPR000047;IPR001356;IPR003106;IPR009057;IPR017970;IPR045224	Helix-turn-helix motif;Homeobox domain;Leucine zipper, homeobox-associated;Homeobox-like domain superfamily;Homeobox, conserved site;Homeobox-leucine zipper protein, class I, plant	-	-	GO:0000981;GO:0006357;GO:0006355;GO:0045893;GO:0005634;GO:0003677;GO:0043565	molecular_function;biological_process;biological_process;biological_process;cellular_component;molecular_function;molecular_function	A DNA-binding transcription factor activity that modulates the transcription of specific gene sets transcribed by RNA polymerase II.;Any process that modulates the frequency, rate or extent of transcription mediated by RNA polymerase II.;Any process that modulates the frequency, rate or extent of cellular DNA-templated transcription.;Any process that activates or increases the frequency, rate or …	K09338	-	-
Solyc02g068080.3	Solyc02g068080.3	73.17164254848659	69.74807313103145	70.36745256743392	20.6778117294263	20.21752175975733	20.14141798425046	6.93187551176723	1.55159354893485	2.152396e-08	1.175875e-06	A0A3Q7F172	Chloride channel protein	XP_004233300.1	chloride channel protein CLC-b	PF00571;PF00654	CBS domain;Voltage gated chloride channel	IPR000644;IPR001807;IPR002251;IPR014743;IPR046342	CBS domain;Chloride channel, voltage gated;Chloride channel ClC-plant;Chloride channel, core;CBS domain superfamily	-	-	GO:0034220;GO:1902600;GO:0009705;GO:0009671;GO:0016020;GO:0005247;GO:0043231;GO:0055085;GO:0006821;GO:1902476;GO:0015706	biological_process;biological_process;cellular_component;molecular_function;cellular_component;molecular_function;cellular_component;biological_process;biological_process;biological_process;biological_process	A process in which a monoatomic ion is transported across a membrane. Monatomic ions (also called simple ions) are ions consisting of exactly one atom.;The directed movement of a proton across a membrane.;The lipid bilayer surrounding a vacuole that retains the same shape regardless of cell cycle phase. The membrane separates its contents from the cytoplasm of the cell. An example of this compone…	K05016	-	-
Solyc06g073540.4	Solyc06g073540.4	17.945648994072144	17.192047129165854	17.042732921337684	5.308916788930764	5.583365826332887	5.373295166641043	5.13515848918312	1.42899519233636	2.356292e-08	1.248577e-06	K4LP77	AGO4B	NP_001289847.1	Argonaute 4B	PF08699;PF16488;PF16487;PF16486;PF02170;PF02171	Argonaute linker 1 domain;Argonaute linker 2 domain;Mid domain of argonaute;N-terminal domain of argonaute;PAZ domain;Piwi domain	IPR003100;IPR003165;IPR012337;IPR014811;IPR032472;IPR032473;IPR032474;IPR036085;IPR036397;IPR045246	PAZ domain;Piwi domain;Ribonuclease H-like superfamily;Argonaute, linker 1 domain;Argonaute linker 2 domain;Protein argonaute, Mid domain;Protein argonaute, N-terminal;PAZ domain superfamily;Ribonuclease H superfamily;Argonaute-like, PIWI domain	-	-	GO:0051607;GO:0003723;GO:1990904;GO:0031047	biological_process;molecular_function;cellular_component;biological_process	Reactions triggered in response to the presence of a virus that act to protect the cell or organism.;Binding to an RNA molecule or a portion thereof.;A macromolecular complex that contains both RNA and protein molecules.;A process in which an regulatory non-coding RNA molecule reduces expression of target genes. This can occur pre-transcriptionally by assembly of heterochromatin and prevention of…	K11593	ko04361	Axon regeneration
Solyc04g049222.1	Solyc04g049222.1	31.10401558883495	25.744293293897087	27.92280649856024	1.7314390554820158	2.5485874884480104	3.09550168812401	3.37496574404592	3.26013612055717	2.369324e-08	1.250082e-06	-	-	-	-	-	-	-	-	-	-	-	-	-	-	-	-
Solyc07g016180.3	Solyc07g016180.3	9.9996765885917	8.680405493964752	9.082391883743938	2.1047709327722317	2.1704290493265432	2.413852182724811	4.50914234328418	1.79943972414873	2.384914e-08	1.250082e-06	Q2LAJ3	Auxin response factor 2A	NP_001233765.1	auxin response factor 2A	PF06507;PF02309;PF02362	Auxin response factor;AUX/IAA family;B3 DNA binding domain	IPR000270;IPR003340;IPR010525;IPR015300;IPR033389;IPR044835	PB1 domain;B3 DNA binding domain;Auxin response factor domain;DNA-binding pseudobarrel domain superfamily;AUX/IAA domain;Auxin response factor	ENOG502QRXI	-	GO:0009911;GO:0009725;GO:0042803;GO:0009835;GO:0009836;GO:0003677;GO:0009734;GO:0006355;GO:0046982;GO:0005634	biological_process;biological_process;molecular_function;biological_process;biological_process;molecular_function;biological_process;biological_process;molecular_function;cellular_component	Any process that activates or increases the frequency, rate or extent of flower development.;Any process that results in a change in state or activity of a cell or an organism (in terms of movement, secretion, enzyme production, gene expression, etc.) as a result of a hormone stimulus.;Binding to an identical protein to form a homodimer.;An developmental maturation process that has as participant…	-	-	-
Solyc08g077170.3	Solyc08g077170.3	3.919561597449083	3.508252893861803	4.051557480085511	0.3011750870820093	0.3509568642349049	0.233700911087344	1.98164268269258	3.42265947716102	2.499241e-08	1.282373e-06	A0A3Q7HU28	Uncharacterized protein	XP_004245877.1	protein NRT1/ PTR FAMILY 7.3	PF00854	POT family	IPR000109;IPR036259	Proton-dependent oligopeptide transporter family;MFS transporter superfamily	-	-	GO:0022857;GO:0055085;GO:0016020	molecular_function;biological_process;cellular_component	Enables the transfer of a substance, usually a specific substance or a group of related substances, from one side of a membrane to the other.;The process in which a solute is transported across a lipid bilayer, from one side of a membrane to the other.;A lipid bilayer along with all the proteins and protein complexes embedded in it and attached to it.	K14638	-	-
Solyc03g044480.3	Solyc03g044480.3	96.5370884800495	109.71723456916786	89.47563552092222	17.47108263362004	15.896682849269483	14.986901512983753	5.48130478461953	2.36176229393099	2.50075e-08	1.282373e-06	A0A3Q7G659	Cyclin-dependent kinase inhibitor	XP_004234724.1	cyclin-dependent kinase inhibitor 1-like isoform X2	PF02234	Cyclin-dependent kinase inhibitor	IPR003175;IPR044275;IPR044898	Cyclin-dependent kinase inhibitor domain;Cyclin-dependent kinase inhibitor, plant;Cyclin-dependent kinase inhibitor domain superfamily	-	-	GO:0004860;GO:0004861;GO:0005654;GO:0005634	molecular_function;molecular_function;cellular_component;cellular_component	Binds to and stops, prevents or reduces the activity of a protein kinase.;Binds to and stops, prevents or reduces the activity of a cyclin-dependent protein serine/threonine kinase.;That part of the nuclear content other than the chromosomes or the nucleolus.;A membrane-bounded organelle of eukaryotic cells in which chromosomes are housed and replicated. In most cells, the nucleus contains all of…	-	-	-
Solyc03g044205.1	Solyc03g044205.1	9.185071270077426	8.40334847490206	7.982844845919729	0.4559456179435975	0.6040152347621784	0.50946798617041	1.27615936320892	3.73386008162904	2.506029e-08	1.282373e-06	A0A3Q7JVU3	Reverse transcriptase Ty1/copia-type domain-containing protein	-	-	PF07727	Reverse transcriptase (RNA-dependent DNA polymerase)	IPR013103	Reverse transcriptase, RNA-dependent DNA polymerase	-	-	-	-	-	-	-	-
Solyc01g102300.3	Solyc01g102300.3	14.164742525151286	14.137542478811904	12.532412857213842	3.183440928870769	3.439907390798057	3.495452999285773	4.44562946380931	1.75910888082316	2.537799e-08	1.288431e-06	A0A3Q7EQR7	BHLH domain-containing protein	XP_010313968.1;XP_010313958.1;XP_010313963.1	transcription factor PIF3 isoform X1;transcription factor PIF3 isoform X1;transcription factor PIF3 isoform X1	PF00010	Helix-loop-helix DNA-binding domain	IPR011598;IPR036638;IPR044273;IPR047265	Myc-type, basic helix-loop-helix (bHLH) domain;Helix-loop-helix DNA-binding domain superfamily;Transcription factor PIF3-like;Transcription factor PIF1-like, basic helix-loop-helix domain	-	-	GO:0003700;GO:0006355;GO:0005634;GO:0010017;GO:0046983	molecular_function;biological_process;cellular_component;biological_process;molecular_function	A transcription regulator activity that modulates transcription of gene sets via selective and non-covalent binding to a specific double-stranded genomic DNA sequence (sometimes referred to as a motif) within a cis-regulatory region. Regulatory regions include promoters (proximal and distal) and enhancers. Genes are transcriptional units, and include bacterial operons.;Any process that modulates …	K12126	ko04712;ko04075	Circadian rhythm - plant;Plant hormone signal transduction
Solyc04g005250.4	Solyc04g005250.4	10.19467059769567	8.989684878889008	9.19234129427544	1.9148507083234425	2.2260216782662696	2.28956668994833	3.6590539980906	1.88612667800918	2.609605e-08	1.306509e-06	A0A3Q7FWY0	SAM-dependent MTase DRM-type domain-containing protein	-	-	PF00145	C-5 cytosine-specific DNA methylase	IPR001525;IPR015940;IPR029063;IPR030380	C-5 cytosine methyltransferase;Ubiquitin-associated domain;S-adenosyl-L-methionine-dependent methyltransferase superfamily;SAM-dependent methyltransferase DRM	-	-	GO:0008168;GO:0005634;GO:0003886;GO:0032259	molecular_function;cellular_component;molecular_function;biological_process	Catalysis of the transfer of a methyl group to an acceptor molecule.;A membrane-bounded organelle of eukaryotic cells in which chromosomes are housed and replicated. In most cells, the nucleus contains all of the cell's chromosomes except the organellar chromosomes, and is the site of RNA synthesis and processing. In some species, or in specialized cell types, RNA metabolism or DNA replication ma…	-	-	-
Solyc03g026110.4	Solyc03g026110.4	15.241961807725582	13.17547665713612	14.4424578137346	3.433263833993623	3.286596791782502	2.973345584817068	4.10685911103945	1.89177636144009	2.613826e-08	1.306509e-06	A0A3Q7FHK2	DUF4005 domain-containing protein	XP_004234367.1	-	PF13178;PF00612	Protein of unknown function (DUF4005);IQ calmodulin-binding motif	IPR000048;IPR025064	IQ motif, EF-hand binding site;Domain of unknown function DUF4005	-	-	GO:0005516	molecular_function	Binding to calmodulin, a calcium-binding protein with many roles, both in the calcium-bound and calcium-free states.	-	-	-
Solyc01g102340.3	Solyc01g102340.3	25.16282055822293	21.10372877654175	19.40298366006554	3.125190162725984	4.080102910314054	2.9859547533828668	4.43883485346088	2.42577376789484	2.712034e-08	1.341765e-06	A0A3Q7F9B4	Uncharacterized protein	XP_004230371.1	transcription factor MYB61	PF00249	Myb-like DNA-binding domain	IPR001005;IPR009057;IPR017930	SANT/Myb domain;Homeobox-like domain superfamily;Myb domain	-	-	GO:0010597;GO:0006355;GO:0005634;GO:0000976	biological_process;biological_process;cellular_component;molecular_function	The chemical reactions and pathways resulting in the formation of volatile molecules emitted from green plants, such as hexenal, hexenol and hexenyl acetate, from linoleic acid or linolenic acid.;Any process that modulates the frequency, rate or extent of cellular DNA-templated transcription.;A membrane-bounded organelle of eukaryotic cells in which chromosomes are housed and replicated. In most …	K09422	-	-
Solyc02g070540.3	Solyc02g070540.3	13.8752796813409	13.71230764929116	14.905416095748784	2.486976097874168	2.768403159326652	2.9525985562148764	3.68477555141635	2.12122864916947	2.74123e-08	1.34937e-06	A0A3Q7F3S3	DUF642 domain-containing protein	NP_001316144.1	carbohydrate binding domain-containing protein precursor	PF04862	Protein of unknown function (DUF642)	IPR006946;IPR008979	DUF642 L-galactono-1,4-lactone-responsive gene 2-like domain;Galactose-binding-like domain superfamily	-	-	-	-	-	-	-	-
Solyc12g007210.2	Solyc12g007210.2	53.11800290647815	46.21711041132794	46.53016936335124	12.84577219249788	14.085730771133807	11.96142228400093	4.48775189389885	1.65158787603441	2.741322e-08	1.34937e-06	A0A3Q7J3E7	Rac-like GTP-binding protein ARAC7	XP_010313730.1	rac-like GTP-binding protein ARAC7 isoform X1	PF00071	Ras family	IPR001806;IPR003578;IPR005225;IPR027417	Small GTPase;Small GTPase Rho;Small GTP-binding protein domain;P-loop containing nucleoside triphosphate hydrolase	-	-	GO:0007163;GO:0019901;GO:0003924;GO:0005525;GO:0031410;GO:0005856;GO:0042995;GO:0007165;GO:0007264;GO:0030865;GO:0008360;GO:0005886;GO:0007015;GO:0032956	biological_process;molecular_function;molecular_function;molecular_function;cellular_component;cellular_component;cellular_component;biological_process;biological_process;biological_process;biological_process;cellular_component;biological_process;biological_process	Any cellular process that results in the specification, formation or maintenance of anisotropic intracellular organization or cell growth patterns.;Binding to a protein kinase, any enzyme that catalyzes the transfer of a phosphate group, usually from ATP, to a protein substrate.;Catalysis of the reaction: GTP + H2O = GDP + H+ + phosphate.;Binding to GTP, guanosine triphosphate.;A vesicle found in…	K04392	ko04933;ko04972;ko04650;ko05211;ko04722;ko04360;ko05170;ko05416;ko04810;ko05231;ko04664;ko05205;ko04015;ko04151;ko04145;ko04071;ko05212;ko05014;ko05120;ko04380;ko04024;ko05169;ko05200;ko04010;ko04062;ko04014;ko04370;ko04510;ko05132;ko05418;ko04620;ko04530;ko04662;ko05100;ko05203;ko04666;ko04013;ko04520;ko04932;ko05131;ko04310;ko04670;ko05135;ko05210;ko05163;ko04361;ko05167	AGE-RAGE signaling pathway in diabetic complications;Pancreatic secretion;Natural killer cell mediated cytotoxicity;Renal cell carcinoma;Neurotrophin signaling pathway;Axon guidance;Human immunodeficiency virus 1 infection;Viral myocarditis;Regulation of actin cytoskeleton;Choline metabolism in cancer;Fc epsilon RI signaling pathway;Proteoglycans in cancer;Rap1 signaling pathway;PI3K-Akt signalin…
Solyc01g098400.3	Solyc01g098400.3	71.0686448899909	65.44969751231483	73.15950644380167	13.859538982523926	14.520366239647071	16.701102857904168	5.1963784058611	1.96584060914651	2.78981e-08	1.362861e-06	A0A3Q7F7D4	Histidine-containing phosphotransfer protein	XP_004230155.1	histidine-containing phosphotransfer protein 1	PF01627	Hpt domain	IPR008207;IPR036641;IPR045871	Signal transduction histidine kinase, phosphotransfer (Hpt) domain;HPT domain superfamily;Histidine-containing phosphotransfer protein 1-5/Phosphorelay intermediate protein YPD1	-	-	GO:0043424;GO:0009736;GO:0005829;GO:0005737;GO:0000160;GO:0005634;GO:0009927	molecular_function;biological_process;cellular_component;cellular_component;biological_process;cellular_component;molecular_function	Binding to a protein histidine kinase.;The series of molecular signals generated by the binding of a cytokinin to a receptor, and ending with the regulation of a downstream cellular process, e.g. transcription.;The part of the cytoplasm that does not contain organelles but which does contain other particulate matter, such as protein complexes.;The contents of a cell excluding the plasma membrane …	K14490	ko04075	Plant hormone signal transduction
Solyc08g014030.1	Solyc08g014030.1	4.814665897520387	4.786332402105597	5.065421025043325	0.4700919020325397	0.461300417956795	0.4742064787743673	1.72785261203597	3.1280803094098	2.838926e-08	1.376453e-06	A0A3Q7HIU8	Uncharacterized protein	-	-	PF03514	GRAS domain family	IPR005202	Transcription factor GRAS	-	-	GO:0003700;GO:0006355;GO:0043565;GO:0005634	molecular_function;biological_process;molecular_function;cellular_component	A transcription regulator activity that modulates transcription of gene sets via selective and non-covalent binding to a specific double-stranded genomic DNA sequence (sometimes referred to as a motif) within a cis-regulatory region. Regulatory regions include promoters (proximal and distal) and enhancers. Genes are transcriptional units, and include bacterial operons.;Any process that modulates …	-	-	-
Solyc10g039290.2	Solyc10g039290.2	43.06419232748813	31.133415946589523	33.783618679889145	4.921649314772743	6.112470673491281	4.463480586802707	5.21668636158192	2.54007837966639	2.84648e-08	1.376674e-06	A0A3Q7IEY4	Uncharacterized protein	XP_004248524.1	protein NRT1/ PTR FAMILY 4.5	PF00854	POT family	IPR000109;IPR036259	Proton-dependent oligopeptide transporter family;MFS transporter superfamily	-	-	GO:0022857;GO:0055085;GO:0016020	molecular_function;biological_process;cellular_component	Enables the transfer of a substance, usually a specific substance or a group of related substances, from one side of a membrane to the other.;The process in which a solute is transported across a lipid bilayer, from one side of a membrane to the other.;A lipid bilayer along with all the proteins and protein complexes embedded in it and attached to it.	K14638	-	-
Solyc11g066820.2	Solyc11g066820.2	62.71142638794671	50.86059140152447	55.28514750597911	11.34297135930073	14.439039423182871	13.621909724151005	6.06032454905765	1.84465665596478	2.877807e-08	1.384918e-06	A0A3Q7IZC8	Glycosyltransferase 2-like domain-containing protein	XP_004251009.1	glucomannan 4-beta-mannosyltransferase 2	PF13632	Glycosyl transferase family group 2	IPR001173;IPR029044	Glycosyltransferase 2-like;Nucleotide-diphospho-sugar transferases	-	-	GO:0000139;GO:0016020;GO:0005794;GO:0051753	cellular_component;cellular_component;cellular_component;molecular_function	The lipid bilayer surrounding any of the compartments of the Golgi apparatus.;A lipid bilayer along with all the proteins and protein complexes embedded in it and attached to it.;A membrane-bound cytoplasmic organelle of the endomembrane system that further processes the core oligosaccharides (e.g. N-glycans) added to proteins in the endoplasmic reticulum and packages them into membrane-bound ves…	K13680	-	-
Solyc02g069970.4	Solyc02g069970.4	20.192410120112875	15.80584870447871	17.780139059340936	3.2828084491939022	4.19790588159714	3.458013956131658	4.62346083838511	2.03977939472893	2.969563e-08	1.418515e-06	Q8GUQ5	Brassinosteroid LRR receptor kinase	NP_001296180.1	brassinosteroid LRR receptor kinase precursor	PF20141;PF08263;PF00560;PF13855;PF00069	Brassinosteroid receptor island domain;Leucine rich repeat N-terminal domain;Leucine Rich Repeat;Leucine rich repeat;Protein kinase domain	IPR000719;IPR001611;IPR003591;IPR008271;IPR011009;IPR013210;IPR017441;IPR032675;IPR045381	Protein kinase domain;Leucine-rich repeat;Leucine-rich repeat, typical subtype;Serine/threonine-protein kinase, active site;Protein kinase-like domain superfamily;Leucine-rich repeat-containing N-terminal, plant-type;Protein kinase, ATP binding site;Leucine-rich repeat domain superfamily;Brassinosteroid receptor BRI1, island domain	ENOG502QRF2	-	GO:0005886;GO:0050832;GO:0004672;GO:0038023;GO:0009755;GO:0106310;GO:0009742;GO:0001578;GO:0005524;GO:0006952;GO:0009729;GO:0004674;GO:0005496;GO:0009647	cellular_component;biological_process;molecular_function;molecular_function;biological_process;molecular_function;biological_process;biological_process;molecular_function;biological_process;biological_process;molecular_function;molecular_function;biological_process	The membrane surrounding a cell that separates the cell from its external environment. It consists of a phospholipid bilayer and associated proteins.;Reactions triggered in response to the presence of a fungus that act to protect the cell or organism.;Catalysis of the phosphorylation of an amino acid residue in a protein, usually according to the reaction: a protein + ATP = a phosphoprotein + ADP…	K13415	ko04075	Plant hormone signal transduction
Solyc02g078760.1	Solyc02g078760.1	34.5161747792695	31.3815216425388	29.894580424220088	8.46550997725199	8.608406101728686	8.424273787069772	3.89189432109362	1.65507090927165	3.027371e-08	1.435369e-06	A0A3Q7F448	DUF4005 domain-containing protein	XP_004232829.1	uncharacterized protein LOC101262169	-	-	-	-	-	-	-	-	-	-	-	-
Solyc05g007830.3	Solyc05g007830.3	76.12870251434923	56.67629083953327	60.485235637729616	14.355187465981988	15.612435306828626	14.636186696123977	5.44529256842725	1.85732494838762	3.038621e-08	1.435369e-06	A0A3Q7GDR9	Expansin	XP_004238818.1	expansin-A1	PF03330;PF01357	Lytic transglycolase;Expansin C-terminal domain	IPR002963;IPR007112;IPR007117;IPR007118;IPR009009;IPR036749;IPR036908	Expansin;Expansin/pollen allergen, DPBB domain;Expansin, cellulose-binding-like domain;Expansin/Lol pI;RlpA-like protein, double-psi beta-barrel domain;Expansin, cellulose-binding-like domain superfamily;RlpA-like domain superfamily	-	-	GO:0009653;GO:0009664;GO:0016020;GO:0071555;GO:0005576	biological_process;biological_process;cellular_component;biological_process;cellular_component	The process in which anatomical structures are generated and organized. Morphogenesis pertains to the creation of form.;A process that results in the assembly and arrangement of constituent parts of the cellulose and pectin-containing cell wall, or in the disassembly of the cellulose and pectin-containing cell wall. This process is carried out at the cellular level. An example of this process is …	-	-	-
Solyc12g088930.1	Solyc12g088930.1	84.223809484353	79.10649595985434	72.96013924897976	16.83185423041237	19.416344273809663	14.617099675943765	5.23133360654279	1.96124598647502	3.055597e-08	1.435369e-06	A0A3Q7JY04	Protein MIZU-KUSSEI 1	XP_004252775.1	protein MIZU-KUSSEI 1	PF04759	Protein of unknown function, DUF617	IPR006460	Protein MIZU-KUSSEI 1-like, plant	-	-	GO:0010274	biological_process	Growth or movement in a sessile organism toward or away from water, as of the roots of a plant.	-	-	-
Solyc12g005040.2	Solyc12g005040.2	72.20663694926739	58.80584783137343	69.47222004953619	13.917609965213693	11.988439260298753	12.785128170055916	4.90249045504991	2.12050165220477	3.056885e-08	1.435369e-06	P27161	Calmodulin	NP_001234786.1	calmodulin	PF13499	EF-hand domain pair	IPR002048;IPR011992;IPR018247	EF-hand domain;EF-hand domain pair;EF-Hand 1, calcium-binding site	KOG0027	Calmodulin and related proteins (EF-Hand superfamily)	GO:0030234;GO:0005509;GO:0046872	molecular_function;molecular_function;molecular_function	Binds to and modulates the activity of an enzyme.;Binding to a calcium ion (Ca2+).;Binding to a metal ion.	K02183	ko05167;ko04022;ko04728;ko04015;ko04720;ko04910;ko04625;ko04970;ko04713;ko04070;ko04922;ko05200;ko04750;ko05010;ko04915;ko04014;ko04626;ko04971;ko04745;ko04925;ko05034;ko05170;ko04921;ko04261;ko04916;ko05133;ko04024;ko04020;ko04114;ko04912;ko04371;ko04722;ko05031;ko04744;ko04924;ko04218;ko05214;ko04740;ko05152;ko04016;ko05418;ko05163;ko04270	Kaposi sarcoma-associated herpesvirus infection;cGMP-PKG signaling pathway;Dopaminergic synapse;Rap1 signaling pathway;Long-term potentiation;Insulin signaling pathway;C-type lectin receptor signaling pathway;Salivary secretion;Circadian entrainment;Phosphatidylinositol signaling system;Glucagon signaling pathway;Pathways in cancer;Inflammatory mediator regulation of TRP channels;Alzheimer diseas…
Solyc12g027540.3	Solyc12g027540.3	471.37500547638	443.1912912173931	386.3539163960304	89.39339930881857	78.24320425688528	71.24713837367733	5.56603373245537	2.19013221365826	3.08326e-08	1.435369e-06	A0A3Q7J7L7	Reverse transcriptase Ty1/copia-type domain-containing protein	-	-	-	-	-	-	-	-	-	-	-	-	-	-
Solyc09g082670.3	Solyc09g082670.3	15.292847170703157	18.709077961184367	18.17365289421073	1.82378247177439	2.286806650128412	2.201404878514117	3.76019528944885	2.79428011624144	3.314091e-08	1.508962e-06	Q40152	Heat shock factor protein HSF8	NP_001296177.1	heat shock factor protein HSF8	PF00447	HSF-type DNA-binding	IPR000232;IPR027725;IPR036388;IPR036390	Heat shock factor (HSF)-type, DNA-binding;Heat shock transcription factor family;Winged helix-like DNA-binding domain superfamily;Winged helix DNA-binding domain superfamily	KOG0627	Heat shock transcription factor	GO:0043565;GO:0000978;GO:0003677;GO:0003700;GO:0034605;GO:0006355;GO:0005634;GO:0006357	molecular_function;molecular_function;molecular_function;molecular_function;biological_process;biological_process;cellular_component;biological_process	Binding to DNA of a specific nucleotide composition, e.g. GC-rich DNA binding, or with a specific sequence motif or type of DNA e.g. promotor binding or rDNA binding.;Binding to a specific upstream regulatory DNA sequence (transcription factor recognition sequence or binding site) located in cis relative to the transcription start site (i.e., on the same strand of DNA) of a gene transcribed by RN…	K09419	-	-
Solyc06g065120.1	Solyc06g065120.1	21.619558346688947	18.91810821438117	20.042444945046498	3.342225796690624	3.990326890284075	3.0429762069906845	2.92093643995815	2.28407063935115	3.337861e-08	1.508962e-06	A0A3Q7GYR9	Uncharacterized protein	XP_019069722.1	TMV resistance protein N-like	-	-	IPR032675	Leucine-rich repeat domain superfamily	-	-	GO:0098542	biological_process	Reactions triggered in response to the presence of another organism that act to protect the cell or organism from damage caused by that organism.	-	-	-
Solyc03g113250.4	Solyc03g113250.4	11.889466339953728	9.793315517221576	10.253929789753984	2.1978682445706417	2.053772964737999	1.7706184273625585	3.59579817030581	2.15253070412277	3.491652e-08	1.54959e-06	A0A3Q7FSH3	Uncharacterized protein	-	-	PF00854	POT family	IPR000109;IPR036259	Proton-dependent oligopeptide transporter family;MFS transporter superfamily	-	-	GO:0022857;GO:0055085;GO:0016020	molecular_function;biological_process;cellular_component	Enables the transfer of a substance, usually a specific substance or a group of related substances, from one side of a membrane to the other.;The process in which a solute is transported across a lipid bilayer, from one side of a membrane to the other.;A lipid bilayer along with all the proteins and protein complexes embedded in it and attached to it.	-	-	-
Solyc05g054930.3	Solyc05g054930.3	22.49758362378544	23.515003210279207	24.163034141386888	5.973799177286091	6.361502370860219	6.417121330380935	5.3902181624633	1.65391726545565	3.554926e-08	1.559824e-06	A0A3Q7GKW0	Uncharacterized protein	XP_010321358.1;XP_004239755.1	myosin-3 isoform X1;myosin-3 isoform X1	-	-	-	-	-	-	-	-	-	-	-	-
Solyc09g007640.4	Solyc09g007640.4	36.16571207585418	35.80554254410667	30.77522346162792	7.768923910014039	6.964446123236506	6.554187793615774	5.05170863141184	2.01741160750823	3.646409e-08	1.582951e-06	A0A3Q7HWG9	Carboxypeptidase	XP_004246668.1	serine carboxypeptidase-like 50	PF00450	Serine carboxypeptidase	IPR001563;IPR018202;IPR029058;IPR033124	Peptidase S10, serine carboxypeptidase;Serine carboxypeptidase, serine active site;Alpha/Beta hydrolase fold;Serine carboxypeptidases, histidine active site	-	-	GO:0006508;GO:0004180;GO:0004185;GO:0005576	biological_process;molecular_function;molecular_function;cellular_component	The hydrolysis of proteins into smaller polypeptides and/or amino acids by cleavage of their peptide bonds.;Catalysis of the hydrolysis of a single C-terminal amino acid residue from a polypeptide chain.;Catalysis of the hydrolysis of a single C-terminal amino acid residue from the C-terminus of a polypeptide chain by a catalytic mechanism that involves a catalytic triad consisting of a serine nu…	K09645	-	-
Solyc10g008520.3	Solyc10g008520.3	37.183671666911074	32.541970575525724	30.67945435785664	8.688359473716735	10.413234554943816	9.197541810459398	5.38067030459235	1.57161704138316	3.664805e-08	1.583227e-06	A0A3Q7IBE3	Indole-3-acetic acid-amido synthetase GH3.5	XP_004248149.1	-	PF03321	GH3 auxin-responsive promoter	IPR004993	GH3 family	-	-	GO:0016881;GO:0005737	molecular_function;cellular_component	Catalysis of the ligation of an acid to an amino acid via a carbon-nitrogen bond, with the concomitant hydrolysis of the diphosphate bond in ATP or a similar triphosphate.;The contents of a cell excluding the plasma membrane and nucleus, but including other subcellular structures.	K14487	ko04075	Plant hormone signal transduction
Solyc08g062290.4	Solyc08g062290.4	5.133787188356614	4.227094911316335	4.056209096021315	0.0841745756203564	0.1858508414652857	0.1959492254501577	1.41307093247605	4.52553124255107	3.665407e-08	1.583227e-06	A0A3Q7I2B7	D-alanine--D-alanine ligase C-terminal domain-containing protein	XP_010326176.1	uncharacterized protein LOC104649147	PF07478	D-ala D-ala ligase C-terminus	IPR011095	D-alanine--D-alanine ligase, C-terminal	-	-	GO:0008716	molecular_function	Catalysis of the reaction: 2 D-alanine + ATP = D-alanyl-D-alanine + ADP + 2 H+ + phosphate.	-	-	-
Solyc04g047885.1	Solyc04g047885.1	11.330318931586612	10.23827484420178	12.025508034245638	1.779835906189465	1.6841732879771587	2.025595607665485	3.44617619511509	2.36667485483224	3.744699e-08	1.603194e-06	-	-	-	-	-	-	-	-	-	-	-	-	-	-	-	-
Solyc11g010690.3	Solyc11g010690.3	29.78479688255086	31.81871070753657	28.67810992450158	6.911175682513479	5.994737668316358	6.0714793840609005	5.37560314287686	1.99888234982053	3.811909e-08	1.624795e-06	A0A3Q7IS40	Nucleobase-ascorbate transporter 11	-	-	PF00860	Permease family	IPR006043	Nucleobase cation symporter 2 family	-	-	GO:0005886;GO:0022857;GO:0055085;GO:0016020	cellular_component;molecular_function;biological_process;cellular_component	The membrane surrounding a cell that separates the cell from its external environment. It consists of a phospholipid bilayer and associated proteins.;Enables the transfer of a substance, usually a specific substance or a group of related substances, from one side of a membrane to the other.;The process in which a solute is transported across a lipid bilayer, from one side of a membrane to the oth…	-	-	-
Solyc10g006710.4	Solyc10g006710.4	18.358060407788827	16.206058149694407	17.25706296731746	5.331261709736989	5.501089738689921	5.500912564649051	4.90313388165348	1.41211794347199	3.914674e-08	1.654056e-06	Q8GUQ5	Brassinosteroid LRR receptor kinase	NP_001296180.1	brassinosteroid LRR receptor kinase precursor	PF20141;PF08263;PF00560;PF13855;PF00069	Brassinosteroid receptor island domain;Leucine rich repeat N-terminal domain;Leucine Rich Repeat;Leucine rich repeat;Protein kinase domain	IPR000719;IPR001611;IPR003591;IPR008271;IPR011009;IPR013210;IPR017441;IPR032675;IPR045381	Protein kinase domain;Leucine-rich repeat;Leucine-rich repeat, typical subtype;Serine/threonine-protein kinase, active site;Protein kinase-like domain superfamily;Leucine-rich repeat-containing N-terminal, plant-type;Protein kinase, ATP binding site;Leucine-rich repeat domain superfamily;Brassinosteroid receptor BRI1, island domain	ENOG502QRF2	-	GO:0005886;GO:0050832;GO:0004672;GO:0038023;GO:0009755;GO:0106310;GO:0009742;GO:0001578;GO:0005524;GO:0006952;GO:0009729;GO:0004674;GO:0005496;GO:0009647	cellular_component;biological_process;molecular_function;molecular_function;biological_process;molecular_function;biological_process;biological_process;molecular_function;biological_process;biological_process;molecular_function;molecular_function;biological_process	The membrane surrounding a cell that separates the cell from its external environment. It consists of a phospholipid bilayer and associated proteins.;Reactions triggered in response to the presence of a fungus that act to protect the cell or organism.;Catalysis of the phosphorylation of an amino acid residue in a protein, usually according to the reaction: a protein + ATP = a phosphoprotein + ADP…	K13415	ko04075	Plant hormone signal transduction
Solyc10g086380.1	Solyc10g086380.1	11.567819027177794	11.87042317247784	11.310431297417413	2.2992432718089586	1.950710680360343	2.051748504616243	3.34268274153166	2.21621219514309	3.947148e-08	1.664152e-06	Q7Y1B6	DELLA protein GAI	NP_001234365.1	DELLA protein GAI	PF12041;PF03514	Transcriptional regulator DELLA protein N terminal;GRAS domain family	IPR005202;IPR021914;IPR038088	Transcription factor GRAS;Transcriptional factor DELLA, N-terminal;DELLA, N-terminal domain superfamily	ENOG502QPMG	-	GO:0042538;GO:2000377;GO:0043565;GO:0009863;GO:0010187;GO:0003700;GO:0009867;GO:0009938;GO:0006355;GO:0005634;GO:0009737;GO:0009740;GO:0009723;GO:2000033	biological_process;biological_process;molecular_function;biological_process;biological_process;molecular_function;biological_process;biological_process;biological_process;cellular_component;biological_process;biological_process;biological_process;biological_process	Any process that results in a change in state or activity of a cell or an organism (in terms of movement, secretion, enzyme production, gene expression, etc.) as a result of detection of, or exposure to, an increase in the concentration of salt (particularly but not exclusively sodium and chloride ions) in the environment.;Any process that modulates the frequency, rate or extent of reactive oxyge…	K14494	ko04075	Plant hormone signal transduction
Solyc07g008560.3	Solyc07g008560.3	142.09794846147707	135.37530057482675	156.9867239205753	28.517256695398387	30.702636609581464	32.91014285612698	7.63975359972825	1.98647604826303	3.999674e-08	1.678997e-06	A0A3Q7I175	Purple acid phosphatase	XP_004242805.1	probable inactive purple acid phosphatase 27	PF00149;PF14008;PF16656	Calcineurin-like phosphoesterase;Iron/zinc purple acid phosphatase-like protein C;Purple acid Phosphatase, N-terminal domain	IPR004843;IPR008963;IPR015914;IPR025733;IPR029052;IPR040974;IPR041792	Calcineurin-like phosphoesterase domain, ApaH type;Purple acid phosphatase-like, N-terminal;Purple acid phosphatase, N-terminal;Iron/zinc purple acid phosphatase-like C-terminal domain;Metallo-dependent phosphatase-like;Purple acid phosphatase, Fn3-like domain;Purple acid phosphatase, metallophosphatase domain	-	-	GO:0016787;GO:0003993;GO:0046872;GO:0005576	molecular_function;molecular_function;molecular_function;cellular_component	Catalysis of the hydrolysis of various bonds, e.g. C-O, C-N, C-C, phosphoric anhydride bonds, etc.;Catalysis of the reaction: an orthophosphoric monoester + H2O = an alcohol + phosphate, with an acid pH optimum.;Binding to a metal ion.;The space external to the outermost structure of a cell. For cells without external protective or external encapsulating structures this refers to space outside of…	K22390	-	-
Solyc04g082880.4	Solyc04g082880.4	11.03004488407486	10.87683915984238	8.790418258964799	1.2993226643723628	1.118346633235876	0.8612652002344141	3.58597704646624	2.97328913624434	4.032741e-08	1.685582e-06	A0A3Q7GC67	Pyrophosphate--fructose 6-phosphate 1-phosphotransferase subunit alpha	-	-	PF00365	Phosphofructokinase	IPR000023;IPR011183;IPR035966	Phosphofructokinase domain;Pyrophosphate-dependent phosphofructokinase PfpB;Phosphofructokinase superfamily	-	-	GO:0016301;GO:0015979;GO:0009749;GO:0005524;GO:0005737;GO:0046835;GO:0046872;GO:0047334;GO:0061615;GO:0003872;GO:0006096	molecular_function;biological_process;biological_process;molecular_function;cellular_component;biological_process;molecular_function;molecular_function;biological_process;molecular_function;biological_process	Catalysis of the transfer of a phosphate group, usually from ATP, to a substrate molecule.;The synthesis by organisms of organic chemical compounds, especially carbohydrates, from carbon dioxide (CO2) using energy obtained from light rather than from the oxidation of chemical compounds.;Any process that results in a change in state or activity of a cell or an organism (in terms of movement, secre…	-	-	-
Solyc10g079600.2	Solyc10g079600.2	172.09268883259855	158.08043250047896	190.9880892651012	40.41104231575852	44.14424111733913	43.483860110871866	6.16920629380158	1.7743557061687	4.107249e-08	1.709356e-06	A0A3Q7IL16	Response regulatory domain-containing protein	-	-	PF00072	Response regulator receiver domain	IPR001789;IPR011006;IPR045279	Signal transduction response regulator, receiver domain;CheY-like superfamily;Two-component response regulator ARR-like	-	-	GO:0000160;GO:0009736	biological_process;biological_process	A conserved series of molecular signals found in prokaryotes and eukaryotes; involves autophosphorylation of a histidine kinase and the transfer of the phosphate group to an aspartate that then acts as a phospho-donor to response regulator proteins.;The series of molecular signals generated by the binding of a cytokinin to a receptor, and ending with the regulation of a downstream cellular proces…	-	-	-
Solyc09g061930.4	Solyc09g061930.4	4.874054940681502	4.641033393601544	4.688167160092376	0.9589914606027912	0.9512856364586384	0.912383396063012	2.70311631782915	2.07864255837636	4.178136e-08	1.727735e-06	Q8GUQ5	Brassinosteroid LRR receptor kinase	NP_001296180.1	brassinosteroid LRR receptor kinase precursor	PF20141;PF08263;PF00560;PF13855;PF00069	Brassinosteroid receptor island domain;Leucine rich repeat N-terminal domain;Leucine Rich Repeat;Leucine rich repeat;Protein kinase domain	IPR000719;IPR001611;IPR003591;IPR008271;IPR011009;IPR013210;IPR017441;IPR032675;IPR045381	Protein kinase domain;Leucine-rich repeat;Leucine-rich repeat, typical subtype;Serine/threonine-protein kinase, active site;Protein kinase-like domain superfamily;Leucine-rich repeat-containing N-terminal, plant-type;Protein kinase, ATP binding site;Leucine-rich repeat domain superfamily;Brassinosteroid receptor BRI1, island domain	ENOG502QRF2	-	GO:0005886;GO:0050832;GO:0004672;GO:0038023;GO:0009755;GO:0106310;GO:0009742;GO:0001578;GO:0005524;GO:0006952;GO:0009729;GO:0004674;GO:0005496;GO:0009647	cellular_component;biological_process;molecular_function;molecular_function;biological_process;molecular_function;biological_process;biological_process;molecular_function;biological_process;biological_process;molecular_function;molecular_function;biological_process	The membrane surrounding a cell that separates the cell from its external environment. It consists of a phospholipid bilayer and associated proteins.;Reactions triggered in response to the presence of a fungus that act to protect the cell or organism.;Catalysis of the phosphorylation of an amino acid residue in a protein, usually according to the reaction: a protein + ATP = a phosphoprotein + ADP…	K13415	ko04075	Plant hormone signal transduction
Solyc10g081730.2	Solyc10g081730.2	39.39194400296709	30.22993014294267	33.15950935997426	5.477822382678582	7.54840340720545	6.0231777299910005	5.02294263757575	2.17323319395459	4.27475e-08	1.756451e-06	A0A3Q7IM91	TPX2 C-terminal domain-containing protein	XP_010312207.1	-	PF06886	Targeting protein for Xklp2 (TPX2) domain	IPR027329;IPR044833	TPX2, C-terminal;Protein WVD2-like 5/6	-	-	GO:0005856;GO:0008017;GO:0005874;GO:0005737	cellular_component;molecular_function;cellular_component;cellular_component	A cellular structure that forms the internal framework of eukaryotic and prokaryotic cells. The cytoskeleton includes intermediate filaments, microfilaments, microtubules, the microtrabecular lattice, and other structures characterized by a polymeric filamentous nature and long-range order within the cell. The various elements of the cytoskeleton not only serve in the maintenance of cellular shap…	-	-	-
Solyc10g079070.2	Solyc10g079070.2	50.703844931328064	48.310999536542056	47.65548359588652	15.431936726593207	16.58301757821812	14.122182726018426	5.97592704734429	1.41611217688754	4.326322e-08	1.770141e-06	A0A3Q7JEW4	BHLH domain-containing protein	XP_004249191.1	transcription factor bHLH48	PF00010	Helix-loop-helix DNA-binding domain	IPR011598;IPR024097;IPR036638	Myc-type, basic helix-loop-helix (bHLH) domain;Basic helix-loop-helix leucine zipper transcription factor;Helix-loop-helix DNA-binding domain superfamily	-	-	GO:0003700;GO:0006355;GO:0005634;GO:0046983	molecular_function;biological_process;cellular_component;molecular_function	A transcription regulator activity that modulates transcription of gene sets via selective and non-covalent binding to a specific double-stranded genomic DNA sequence (sometimes referred to as a motif) within a cis-regulatory region. Regulatory regions include promoters (proximal and distal) and enhancers. Genes are transcriptional units, and include bacterial operons.;Any process that modulates …	-	-	-
Solyc04g078650.4	Solyc04g078650.4	334.29465829529187	379.5390343619505	390.2625815113702	66.36454318684837	58.494890922591246	62.643831789042274	7.36730335202296	2.30785079992738	4.426848e-08	1.794606e-06	Q84VT7	Protein WUSCHEL	NP_001234015.2	protein WUSCHEL	PF00046	Homeodomain	IPR001356;IPR009057;IPR044555	Homeobox domain;Homeobox-like domain superfamily;Protein WUSCHEL-like	ENOG502QRYV	-	GO:0099402;GO:0003677;GO:0030154;GO:0003700;GO:0009908;GO:0006355;GO:0005634	biological_process;molecular_function;biological_process;molecular_function;biological_process;biological_process;cellular_component	Development of a plant organ, a multi-tissue plant structure that forms a functional unit.;Any molecular function by which a gene product interacts selectively and non-covalently with DNA (deoxyribonucleic acid).;The cellular developmental process in which a relatively unspecialized cell, e.g. embryonic or regenerative cell, acquires specialized structural and/or functional features that characte…	-	-	-
Solyc02g090120.1	Solyc02g090120.1	129.01523707416567	130.68981316643502	116.21971521962224	26.41340131535324	32.352999930939674	25.64907792444133	4.26127749664416	1.89906173089745	4.477029e-08	1.805146e-06	A0A3Q7FC23	Uncharacterized protein	-	-	-	-	-	-	-	-	-	-	-	-	-	-
Solyc02g088820.4	Solyc02g088820.4	58.62817617249468	51.65902386211505	51.43059159421981	17.082274470432722	17.746410911246574	15.327858505941178	5.88486977183355	1.43430444306953	4.710699e-08	1.860518e-06	A0A3Q7FBF5	Carboxypeptidase	XP_004232164.1	serine carboxypeptidase-like 25	PF00450	Serine carboxypeptidase	IPR001563;IPR018202;IPR029058;IPR033124	Peptidase S10, serine carboxypeptidase;Serine carboxypeptidase, serine active site;Alpha/Beta hydrolase fold;Serine carboxypeptidases, histidine active site	-	-	GO:0006508;GO:0004180;GO:0004185;GO:0005576	biological_process;molecular_function;molecular_function;cellular_component	The hydrolysis of proteins into smaller polypeptides and/or amino acids by cleavage of their peptide bonds.;Catalysis of the hydrolysis of a single C-terminal amino acid residue from a polypeptide chain.;Catalysis of the hydrolysis of a single C-terminal amino acid residue from the C-terminus of a polypeptide chain by a catalytic mechanism that involves a catalytic triad consisting of a serine nu…	K16297	-	-
Solyc11g006990.2	Solyc11g006990.2	35.248730216706896	27.075884659842284	28.36677808599117	4.751433281728016	6.455871335109924	5.878476763504731	4.65945459697399	2.14843646020085	4.789659e-08	1.872795e-06	A0A3Q7IQR0	Trichome birefringence-like N-terminal domain-containing protein	XP_004249967.1	protein trichome birefringence-like 36	PF13839;PF14416	GDSL/SGNH-like Acyl-Esterase family found in Pmr5 and Cas1p;PMR5 N terminal Domain	IPR025846;IPR026057;IPR029962	Trichome birefringence-like, N-terminal domain;Trichome birefringence-like, C-terminal domain;Trichome birefringence-like family	-	-	GO:0016413;GO:0005794	molecular_function;cellular_component	Catalysis of the transfer of an acetyl group to an oxygen atom on the acceptor molecule.;A membrane-bound cytoplasmic organelle of the endomembrane system that further processes the core oligosaccharides (e.g. N-glycans) added to proteins in the endoplasmic reticulum and packages them into membrane-bound vesicles. The Golgi apparatus operates at the intersection of the secretory, lysosomal, and e…	-	-	-
Solyc03g113350.3	Solyc03g113350.3	5.472495531776333	4.598889909362522	4.495193837469235	1.2036696831559162	1.24021705499934	1.154428802688756	3.57743274193333	1.76086741079042	4.830243e-08	1.879172e-06	A0A3Q7FRY9	Uncharacterized protein	XP_010318962.1	zinc finger protein BRUTUS-like At1g74770 isoform X1	PF01814;PF05495;PF13639;PF14599	Hemerythrin HHE cation binding domain;CHY zinc finger;Ring finger domain;Zinc-ribbon	IPR001841;IPR008913;IPR012312;IPR013083;IPR017921;IPR037274;IPR037275;IPR039512	Zinc finger, RING-type;Zinc finger, CHY-type;Hemerythrin-like;Zinc finger, RING/FYVE/PHD-type;Zinc finger, CTCHY-type;Zinc finger, CHY-type superfamily;Zinc finger, CTCHY-type superfamily;RCHY1, zinc-ribbon	-	-	GO:0016567;GO:0098771;GO:0006511;GO:0005634;GO:0046872;GO:0061630;GO:0008270	biological_process;biological_process;biological_process;cellular_component;molecular_function;molecular_function;molecular_function	The process in which one or more ubiquitin groups are added to a protein.;Any process involved in the maintenance of an internal steady state of inorganic ions within an organism or cell.;The chemical reactions and pathways resulting in the breakdown of a protein or peptide by hydrolysis of its peptide bonds, initiated by the covalent attachment of a ubiquitin group, or multiple ubiquitin groups,…	K16276	-	-
Solyc12g005030.3	Solyc12g005030.3	40.12888575668045	34.711352197217565	42.29393497010143	6.70474403735274	8.888664230224304	7.4835288500594945	4.62718567181684	2.08947383722382	4.83945e-08	1.879172e-06	A0A3Q7J198	Protein kinase domain-containing protein	-	-	PF00069	Protein kinase domain	IPR000719;IPR011009;IPR017441	Protein kinase domain;Protein kinase-like domain superfamily;Protein kinase, ATP binding site	-	-	GO:0009931;GO:0005516;GO:0005524;GO:0035556;GO:0005737;GO:0004672;GO:0005634;GO:0004683	molecular_function;molecular_function;molecular_function;biological_process;cellular_component;molecular_function;cellular_component;molecular_function	Calcium-dependent catalysis of the reactions: ATP + a protein serine = ADP + protein serine phosphate; and ATP + a protein threonine = ADP + protein threonine phosphate.;Binding to calmodulin, a calcium-binding protein with many roles, both in the calcium-bound and calcium-free states.;Binding to ATP, adenosine 5'-triphosphate, a universally important coenzyme and enzyme regulator.;The process in…	-	-	-
Solyc07g045540.4	Solyc07g045540.4	54.31611813146026	52.1453952860368	55.67060559379539	17.2067658771669	18.532285612021383	17.82414275479716	6.19128082926781	1.34646271269463	4.932073e-08	1.891309e-06	A0A3Q7HD15	Glucose-6-phosphate 1-dehydrogenase	-	-	PF02781;PF00479	Glucose-6-phosphate dehydrogenase, C-terminal domain;Glucose-6-phosphate dehydrogenase, NAD binding domain	IPR001282;IPR019796;IPR022674;IPR022675;IPR036291	Glucose-6-phosphate dehydrogenase;Glucose-6-phosphate dehydrogenase, active site;Glucose-6-phosphate dehydrogenase, NAD-binding;Glucose-6-phosphate dehydrogenase, C-terminal;NAD(P)-binding domain superfamily	-	-	GO:0006006;GO:0050661;GO:0004345;GO:0009051;GO:0016491;GO:0006098	biological_process;molecular_function;molecular_function;biological_process;molecular_function;biological_process	The chemical reactions and pathways involving glucose, the aldohexose gluco-hexose. D-glucose is dextrorotatory and is sometimes known as dextrose; it is an important source of energy for living organisms and is found free as well as combined in homo- and hetero-oligosaccharides and polysaccharides.;Binding to nicotinamide-adenine dinucleotide phosphate, a coenzyme involved in many redox and bios…	-	-	-
Solyc01g104400.3	Solyc01g104400.3	96.63354293668009	95.03959895417232	80.61715578342364	20.089164342251145	20.111716058564845	16.24978933911665	5.24478269608907	2.01571390984811	4.998232e-08	1.905507e-06	A0A3Q7FAM3	Phytocyanin domain-containing protein	XP_004230515.1	basic blue protein	PF02298	Plastocyanin-like domain	IPR003245;IPR008972;IPR028871;IPR039391;IPR041844	Phytocyanin domain;Cupredoxin;Blue (type 1) copper protein, binding site;Phytocyanin-like;Plantacyanin	-	-	GO:0005886;GO:0009055	cellular_component;molecular_function	The membrane surrounding a cell that separates the cell from its external environment. It consists of a phospholipid bilayer and associated proteins.;A molecular function representing the directed movement of electrons from one molecular entity to another, typically mediated by electron carriers or acceptors, resulting in the transfer of energy and/or the reduction-oxidation (redox) transformatio…	-	-	-
Solyc02g089690.3	Solyc02g089690.3	9.670632179698089	9.331685160827188	10.690589626795497	1.778764361393445	1.6145861784130475	1.7667282362080443	3.21761196211713	2.27911825634628	5.009024e-08	1.905507e-06	A0A3Q7F9W7	Xyloglucan backbone O-acetyltransferase 4	XP_004232106.1	protein trichome birefringence-like 19	PF13839;PF14416	GDSL/SGNH-like Acyl-Esterase family found in Pmr5 and Cas1p;PMR5 N terminal Domain	IPR025846;IPR026057;IPR029962	Trichome birefringence-like, N-terminal domain;Trichome birefringence-like, C-terminal domain;Trichome birefringence-like family	-	-	GO:0016413;GO:0016740;GO:0005794;GO:0016020	molecular_function;molecular_function;cellular_component;cellular_component	Catalysis of the transfer of an acetyl group to an oxygen atom on the acceptor molecule.;Catalysis of the transfer of a group, e.g. a methyl group, glycosyl group, acyl group, phosphorus-containing, or other groups, from one compound (generally regarded as the donor) to another compound (generally regarded as the acceptor). Transferase is the systematic name for any enzyme of EC class 2.;A membra…	-	-	-
Solyc06g053960.3	Solyc06g053960.3	22.641832170968566	21.110678188439117	23.36494295262641	4.17306158795835	4.606895858355598	5.107015648294182	3.42661976089644	2.02160403601998	5.178602e-08	1.946392e-06	Q40152	Heat shock factor protein HSF8	NP_001296177.1	heat shock factor protein HSF8	PF00447	HSF-type DNA-binding	IPR000232;IPR027725;IPR036388;IPR036390	Heat shock factor (HSF)-type, DNA-binding;Heat shock transcription factor family;Winged helix-like DNA-binding domain superfamily;Winged helix DNA-binding domain superfamily	KOG0627	Heat shock transcription factor	GO:0043565;GO:0000978;GO:0003677;GO:0003700;GO:0034605;GO:0006355;GO:0005634;GO:0006357	molecular_function;molecular_function;molecular_function;molecular_function;biological_process;biological_process;cellular_component;biological_process	Binding to DNA of a specific nucleotide composition, e.g. GC-rich DNA binding, or with a specific sequence motif or type of DNA e.g. promotor binding or rDNA binding.;Binding to a specific upstream regulatory DNA sequence (transcription factor recognition sequence or binding site) located in cis relative to the transcription start site (i.e., on the same strand of DNA) of a gene transcribed by RN…	K09419	-	-
Solyc03g121440.4	Solyc03g121440.4	32.00246779192568	26.29486470882768	27.184810112456557	8.382017236557616	9.45642933498286	9.14722426922514	5.63771412514701	1.40769227452193	5.297535e-08	1.979584e-06	Q41328	Pto-interacting protein 1	NP_001233803.1;XP_010314665.1	pto-interacting protein 1;pto-interacting protein 1 isoform X1	PF07714	Protein tyrosine and serine/threonine kinase	IPR000719;IPR001245;IPR008271;IPR011009;IPR017441	Protein kinase domain;Serine-threonine/tyrosine-protein kinase, catalytic domain;Serine/threonine-protein kinase, active site;Protein kinase-like domain superfamily;Protein kinase, ATP binding site	KOG1187	Serine/threonine protein kinase	GO:0004672;GO:0005515;GO:0106310;GO:0004674;GO:0009626;GO:0005524	molecular_function;molecular_function;molecular_function;molecular_function;biological_process;molecular_function	Catalysis of the phosphorylation of an amino acid residue in a protein, usually according to the reaction: a protein + ATP = a phosphoprotein + ADP.;Binding to a protein.;Catalysis of the reactions: ATP + protein serine = ADP + protein serine phosphate.;Catalysis of the reactions: ATP + protein serine = ADP + protein serine phosphate, and ATP + protein threonine = ADP + protein threonine phosphat…	K13436	ko04626	Plant-pathogen interaction
Solyc03g123590.4	Solyc03g123590.4	14.372364346056196	15.90486287767065	17.898135811671064	1.8136051142310063	2.366175752249159	2.3540150253856	3.96211349906576	2.63053356760906	5.63883e-08	2.053854e-06	A0A3Q7FUM6	Remorin C-terminal domain-containing protein	-	-	PF03763	Remorin, C-terminal region	IPR005516	Remorin, C-terminal	-	-	-	-	-	-	-	-
Solyc10g083500.2	Solyc10g083500.2	15.956286287060534	14.887121016124754	15.039083725042987	5.104450690070989	5.194632278843211	5.278310401564349	5.14500179517661	1.30531929489628	5.768218e-08	2.077188e-06	A0A3Q7ILW3	Protein kinase domain-containing protein	XP_004249452.1	serine/threonine-protein kinase KIPK1	PF00069	Protein kinase domain	IPR000719;IPR008271;IPR011009	Protein kinase domain;Serine/threonine-protein kinase, active site;Protein kinase-like domain superfamily	-	-	GO:0004674;GO:0005524;GO:0004672;GO:0005737;GO:0016740;GO:0005634;GO:0005886	molecular_function;molecular_function;molecular_function;cellular_component;molecular_function;cellular_component;cellular_component	Catalysis of the reactions: ATP + protein serine = ADP + protein serine phosphate, and ATP + protein threonine = ADP + protein threonine phosphate.;Binding to ATP, adenosine 5'-triphosphate, a universally important coenzyme and enzyme regulator.;Catalysis of the phosphorylation of an amino acid residue in a protein, usually according to the reaction: a protein + ATP = a phosphoprotein + ADP.;The …	-	-	-
Solyc09g005260.4	Solyc09g005260.4	46.27614988969848	36.53848034698315	36.28219386257302	7.854230622222968	9.531688376620352	7.131975485134417	5.32646503884127	2.02219791454354	5.773674e-08	2.077188e-06	A0A3Q7HVM2	Sodium/calcium exchanger membrane region domain-containing protein	-	-	PF00153;PF01699	Mitochondrial carrier protein;Sodium/calcium exchanger protein	IPR002067;IPR004713;IPR004798;IPR004837;IPR018108;IPR023395;IPR044880	Mitochondrial carrier protein;Calcium/proton exchanger;Calcium/proton exchanger CAX-like;Sodium/calcium exchanger membrane region;Mitochondrial substrate/solute carrier;Mitochondrial carrier domain superfamily;NCX, central ion-binding domain superfamily	-	-	GO:0006874;GO:1902600;GO:0009705;GO:0005773;GO:0016020;GO:0006816;GO:0055085;GO:0015369;GO:0070588;GO:0005774	biological_process;biological_process;cellular_component;cellular_component;cellular_component;biological_process;biological_process;molecular_function;biological_process;cellular_component	A homeostatic process involved in the maintenance of a steady state level of calcium ions within a cell.;The directed movement of a proton across a membrane.;The lipid bilayer surrounding a vacuole that retains the same shape regardless of cell cycle phase. The membrane separates its contents from the cytoplasm of the cell. An example of this component is found in Arabidopsis thaliana.;A closed s…	-	-	-
Solyc12g096030.1	Solyc12g096030.1	30.555841401055336	25.71498526955863	27.282415093673805	8.088078787869035	8.92892086170177	8.062884650696923	4.17672206409415	1.48085198974834	6.000755e-08	2.112135e-06	A0A3Q7JYI7	Mitochondrial carrier protein	XP_004253090.1	solute carrier family 25 member 44-like	PF00153	Mitochondrial carrier protein	IPR002067;IPR018108;IPR023395	Mitochondrial carrier protein;Mitochondrial substrate/solute carrier;Mitochondrial carrier domain superfamily	-	-	GO:0016020;GO:0055085	cellular_component;biological_process	A lipid bilayer along with all the proteins and protein complexes embedded in it and attached to it.;The process in which a solute is transported across a lipid bilayer, from one side of a membrane to the other.	K15121	-	-
Solyc06g034290.3	Solyc06g034290.3	28.48111710918848	25.98928304614925	25.36878079148629	8.102095338755378	7.937142940399053	8.538332286291196	4.91334666480675	1.44562	6.027751e-08	2.11649e-06	A0A3Q7HLG4	Major facilitator superfamily (MFS) profile domain-containing protein	XP_004240757.1	putative glycerol-3-phosphate transporter 1	PF00083	Sugar (and other) transporter	IPR000849;IPR011701;IPR020846;IPR036259;IPR044740	Sugar phosphate transporter;Major facilitator superfamily;Major facilitator superfamily domain;MFS transporter superfamily;Glucose-6-phosphate exchanger SLC37A1/ SLC37A2	-	-	GO:0055062;GO:0015760;GO:0016020;GO:0055085;GO:0061513	biological_process;biological_process;cellular_component;biological_process;molecular_function	Any process involved in the maintenance of an internal steady state of phosphate ions within an organism or cell.;The directed movement of glucose-6-phosphate into, out of or within a cell, or between cells, by means of some agent such as a transporter or pore. Glucose-6-phosphate is a monophosphorylated derivative of glucose with the phosphate group attached to C-6.;A lipid bilayer along with al…	K13783	-	-
Solyc09g010840.1	Solyc09g010840.1	98.61305773353602	104.37424888401188	91.4753803406746	26.326123159048056	23.892901807213043	23.963341842586043	5.9898683580371	1.73632078308047	6.034955e-08	2.11649e-06	A0A3Q7HZZ1	Phantastica	NP_001234276.2	phantastica	PF13921	Myb-like DNA-binding domain	IPR001005;IPR009057;IPR017930	SANT/Myb domain;Homeobox-like domain superfamily;Myb domain	-	-	GO:0010597;GO:0006355;GO:0000976	biological_process;biological_process;molecular_function	The chemical reactions and pathways resulting in the formation of volatile molecules emitted from green plants, such as hexenal, hexenol and hexenyl acetate, from linoleic acid or linolenic acid.;Any process that modulates the frequency, rate or extent of cellular DNA-templated transcription.;Binding to a specific sequence of DNA that is part of a regulatory region that controls transcription of …	K09422	-	-
Solyc03g120710.2	Solyc03g120710.2	130.78406554688112	115.09635302703296	123.06615413957076	36.360220165122335	41.18517381331984	41.305600650904765	6.79367491258442	1.3809541818658	6.054338e-08	2.119455e-06	A0A3Q7GKL8	Thioredoxin domain-containing protein	-	-	PF00085;PF13848	Thioredoxin;Thioredoxin-like domain	IPR013766;IPR036249	Thioredoxin domain;Thioredoxin-like superfamily	-	-	GO:0003756;GO:0006457;GO:0016020;GO:0005783;GO:0034976	molecular_function;biological_process;cellular_component;cellular_component;biological_process	Catalysis of the rearrangement of both intrachain and interchain disulfide bonds in proteins.;The process of assisting in the covalent and noncovalent assembly of single chain polypeptides or multisubunit complexes into the correct tertiary structure.;A lipid bilayer along with all the proteins and protein complexes embedded in it and attached to it.;The irregular network of unit membranes, visib…	-	-	-
Solyc10g074680.2	Solyc10g074680.2	2.1642380858906907	1.849574681649028	2.088187451790901	0.1984769316320376	0.2045033442967472	0.1478504433868179	1.44814852157808	3.20047119880901	6.323767e-08	2.170675e-06	Q7Y1B6	DELLA protein GAI	NP_001234365.1	DELLA protein GAI	PF12041;PF03514	Transcriptional regulator DELLA protein N terminal;GRAS domain family	IPR005202;IPR021914;IPR038088	Transcription factor GRAS;Transcriptional factor DELLA, N-terminal;DELLA, N-terminal domain superfamily	ENOG502QPMG	-	GO:0042538;GO:2000377;GO:0043565;GO:0009863;GO:0010187;GO:0003700;GO:0009867;GO:0009938;GO:0006355;GO:0005634;GO:0009737;GO:0009740;GO:0009723;GO:2000033	biological_process;biological_process;molecular_function;biological_process;biological_process;molecular_function;biological_process;biological_process;biological_process;cellular_component;biological_process;biological_process;biological_process;biological_process	Any process that results in a change in state or activity of a cell or an organism (in terms of movement, secretion, enzyme production, gene expression, etc.) as a result of detection of, or exposure to, an increase in the concentration of salt (particularly but not exclusively sodium and chloride ions) in the environment.;Any process that modulates the frequency, rate or extent of reactive oxyge…	K14494	ko04075	Plant hormone signal transduction
Solyc12g044310.2	Solyc12g044310.2	30.98628871029075	24.62912455317896	25.097035517219624	6.603256277416449	7.967219896214977	7.200108378829075	5.03458236115966	1.63323232262235	6.421612e-08	2.199596e-06	A0A3Q7JW70	Uncharacterized protein	XP_004252349.2	protein NRT1/ PTR FAMILY 1.2	PF00854	POT family	IPR000109;IPR018456;IPR036259	Proton-dependent oligopeptide transporter family;PTR2 family proton/oligopeptide symporter, conserved site;MFS transporter superfamily	-	-	GO:0022857;GO:0016020;GO:0055085;GO:0005886;GO:0006857	molecular_function;cellular_component;biological_process;cellular_component;biological_process	Enables the transfer of a substance, usually a specific substance or a group of related substances, from one side of a membrane to the other.;A lipid bilayer along with all the proteins and protein complexes embedded in it and attached to it.;The process in which a solute is transported across a lipid bilayer, from one side of a membrane to the other.;The membrane surrounding a cell that separate…	K14638	-	-
Solyc02g076690.3	Solyc02g076690.3	34.98877827201217	32.21853189315866	33.62392041675032	10.674162442164222	12.469394263648654	11.533355024348545	5.41313997868292	1.28746679458877	6.631339e-08	2.247135e-06	P20721	Low-temperature-induced cysteine proteinase (Fragment)	-	-	PF00396;PF00112	Granulin;Papain family cysteine protease	IPR000118;IPR000169;IPR000668;IPR013128;IPR025660;IPR037277;IPR038765;IPR039417	Granulin;Cysteine peptidase, cysteine active site;Peptidase C1A, papain C-terminal;Peptidase C1A;Cysteine peptidase, histidine active site;Granulin superfamily;Papain-like cysteine peptidase superfamily;Papain-like cysteine endopeptidase	KOG1543;KOG4296	Cysteine proteinase Cathepsin L;Epithelin/granulin	GO:0005615;GO:0051603;GO:0004197;GO:0006508;GO:0008234	cellular_component;biological_process;molecular_function;biological_process;molecular_function	That part of a multicellular organism outside the cells proper, usually taken to be outside the plasma membranes, and occupied by fluid.;The hydrolysis of a peptide bond or bonds within a protein as part of the chemical reactions and pathways resulting in the breakdown of a protein by individual cells.;Catalysis of the hydrolysis of internal, alpha-peptide bonds in a polypeptide chain by a mechan…	-	-	-
Solyc08g077240.3	Solyc08g077240.3	208.8849521615886	204.37256618546	200.83065863551928	59.16051582594528	61.27485933592413	59.954567315273366	8.24390964231015	1.51483377284926	6.65256e-08	2.247135e-06	A0A3Q7HS61	Methyltransferase	XP_019070799.1;XP_004245869.1	probable methyltransferase PMT14;probable methyltransferase PMT14	PF03141	Putative S-adenosyl-L-methionine-dependent methyltransferase	IPR004159;IPR029063	Putative S-adenosyl-L-methionine-dependent methyltransferase;S-adenosyl-L-methionine-dependent methyltransferase superfamily	-	-	GO:0008168;GO:0005737;GO:0016020;GO:0032259	molecular_function;cellular_component;cellular_component;biological_process	Catalysis of the transfer of a methyl group to an acceptor molecule.;The contents of a cell excluding the plasma membrane and nucleus, but including other subcellular structures.;A lipid bilayer along with all the proteins and protein complexes embedded in it and attached to it.;The process in which a methyl group is covalently attached to a molecule.	-	-	-
Solyc02g024070.3	Solyc02g024070.3	4.452478357939966	4.286029650649367	4.228741191060554	0.6788591782966543	0.4752507227113307	0.5550357347653424	2.80835343313003	2.68451733717927	6.655476e-08	2.247135e-06	A0A3Q7EW76	Uncharacterized protein	XP_010315636.1	homeobox-leucine zipper protein ATHB-14-like	PF00046;PF08670;PF01852	Homeodomain;MEKHLA domain;START domain	IPR001356;IPR002913;IPR009057;IPR013978;IPR023393;IPR044830	Homeobox domain;START domain;Homeobox-like domain superfamily;MEKHLA;START-like domain superfamily;Class III homeodomain-leucine zipper family	-	-	GO:0003700;GO:0006355;GO:0008289;GO:0005634;GO:0003677;GO:0030154	molecular_function;biological_process;molecular_function;cellular_component;molecular_function;biological_process	A transcription regulator activity that modulates transcription of gene sets via selective and non-covalent binding to a specific double-stranded genomic DNA sequence (sometimes referred to as a motif) within a cis-regulatory region. Regulatory regions include promoters (proximal and distal) and enhancers. Genes are transcriptional units, and include bacterial operons.;Any process that modulates …	K09338	-	-
Solyc03g113400.4	Solyc03g113400.4	40.43179149224671	40.899383537385255	39.51341828467336	13.26246950075564	13.57844577942172	12.3092936255938	6.45719943523167	1.37440154552296	6.808596e-08	2.277701e-06	P22180	Plasma membrane ATPase 1	NP_001234775.1	plasma membrane ATPase 1	PF00690;PF00122;PF00702	Cation transporter/ATPase, N-terminus;E1-E2 ATPase;haloacid dehalogenase-like hydrolase	IPR001757;IPR004014;IPR006534;IPR008250;IPR018303;IPR023214;IPR023298;IPR023299;IPR036412;IPR044492	P-type ATPase;Cation-transporting P-type ATPase, N-terminal;P-type ATPase, subfamily IIIA;P-type ATPase, A domain superfamily;P-type ATPase, phosphorylation site;HAD superfamily;P-type ATPase, transmembrane domain superfamily;P-type ATPase, cytoplasmic domain N;HAD-like superfamily;P-type ATPase, haloacid dehalogenase domain	KOG0205	Plasma membrane H+-transporting ATPase	GO:0005886;GO:0120029;GO:0046872;GO:0008553;GO:1902600;GO:0016887;GO:0016020;GO:0051453;GO:0005524	cellular_component;biological_process;molecular_function;molecular_function;biological_process;molecular_function;cellular_component;biological_process;molecular_function	The membrane surrounding a cell that separates the cell from its external environment. It consists of a phospholipid bilayer and associated proteins.;The directed movement of hydrogen ions (protons) from inside a cell, across the plasma membrane and into the extracellular region.;Binding to a metal ion.;Enables the transfer of protons from one side of a membrane to the other according to the reac…	K01535	ko00190;ko01100	Oxidative phosphorylation;Metabolic pathways
Solyc03g006260.4	Solyc03g006260.4	3.497125900043247	2.5736760201809283	3.0214054112246087	0.2239296350064053	0.2966514113429526	0.1876621504311196	1.81493109978158	3.39610988671317	6.890626e-08	2.288301e-06	A0A3Q7G1Q3	EF-hand domain-containing protein	XP_004234097.2	sodium/calcium exchanger NCL1-like isoform X1	PF13499;PF01699	EF-hand domain pair;Sodium/calcium exchanger protein	IPR002048;IPR004713;IPR004837;IPR011992;IPR018247	EF-hand domain;Calcium/proton exchanger;Sodium/calcium exchanger membrane region;EF-hand domain pair;EF-Hand 1, calcium-binding site	-	-	GO:0006874;GO:0005509;GO:1902600;GO:0006812;GO:0005773;GO:0016020;GO:0008324;GO:0015368;GO:0055085;GO:0015369;GO:0070588;GO:0005774	biological_process;molecular_function;biological_process;biological_process;cellular_component;cellular_component;molecular_function;molecular_function;biological_process;molecular_function;biological_process;cellular_component	A homeostatic process involved in the maintenance of a steady state level of calcium ions within a cell.;Binding to a calcium ion (Ca2+).;The directed movement of a proton across a membrane.;The directed movement of a monoatomic cation, into, out of or within a cell, or between cells, by means of some agent such as a transporter or pore. Monatomic cations (also called simple cations) are positive…	-	-	-
Solyc09g015080.3	Solyc09g015080.3	16.79641855078622	11.531953119147664	13.262189088981636	2.1977788773252303	2.4044032264356923	1.963510513648323	3.66506819809178	2.40195406241864	7.022132e-08	2.317542e-06	A0A3Q7I196	Patellin-6	XP_004246302.1	patellin-6	PF00650;PF03765	CRAL/TRIO domain;CRAL/TRIO, N-terminal domain	IPR001251;IPR009038;IPR011074;IPR036273;IPR036598;IPR036865;IPR044834	CRAL-TRIO lipid binding domain;GOLD domain;CRAL/TRIO, N-terminal domain;CRAL/TRIO, N-terminal domain superfamily;GOLD domain superfamily;CRAL-TRIO lipid binding domain superfamily;Patellin	-	-	GO:0008289;GO:0051301	molecular_function;biological_process	Binding to a lipid.;The process resulting in division and partitioning of components of a cell to form more cells; may or may not be accompanied by the physical separation of a cell into distinct, individually membrane-bounded daughter cells.	-	-	-
Solyc08g013730.3	Solyc08g013730.3	56.68044945996596	42.8547732019359	49.03031696769625	9.371973084620551	11.75276852328322	11.846958912862164	5.75566460216621	1.91544797763675	7.083777e-08	2.323195e-06	K4CJ08	Nodulin26-like intrinsic protein 51	NP_001274288.1	probable aquaporin NIP5-1-like	PF00230	Major intrinsic protein	IPR000425;IPR022357;IPR023271;IPR034294	Major intrinsic protein;Major intrinsic protein, conserved site;Aquaporin-like;Aquaporin transporter	KOG0223	Aquaporin (major intrinsic protein family)	GO:0016020;GO:0015267;GO:0055085	cellular_component;molecular_function;biological_process	A lipid bilayer along with all the proteins and protein complexes embedded in it and attached to it.;Enables the energy-independent facilitated diffusion of a solute through a transmembrane aqueous pore or channel. Stereospecificity is not exhibited but this transport may be specific for a particular molecular species or class of molecules.;The process in which a solute is transported across a li…	K09874	-	-
Solyc02g084800.4	Solyc02g084800.4	45.2855	35.313491729196954	39.51004825519322	8.751002350156657	10.896643716458897	10.218723872467011	4.63798420957392	1.75095632864497	7.236835e-08	2.354886e-06	P15004	Suberization-associated anionic peroxidase 2	NP_001295320.1	suberization-associated anionic peroxidase 2 precursor	PF00141	Peroxidase	IPR000823;IPR002016;IPR010255;IPR019793;IPR019794;IPR033905	Plant peroxidase;Haem peroxidase;Haem peroxidase superfamily;Peroxidases heam-ligand binding site;Peroxidase, active site;Secretory peroxidase	ENOG502QU1K	-	GO:0042744;GO:0046872;GO:0004601;GO:0098869;GO:0006979;GO:0140825;GO:0005576;GO:0020037	biological_process;molecular_function;molecular_function;biological_process;biological_process;molecular_function;cellular_component;molecular_function	The chemical reactions and pathways resulting in the breakdown of hydrogen peroxide (H2O2).;Binding to a metal ion.;Catalysis of the reaction: a donor + a peroxide = an oxidized donor + 2 H2O.;Any process carried out at the cellular level that reduces or removes the toxicity superoxide radicals or hydrogen peroxide.;Any process that results in a change in state or activity of a cell or an organis…	K00430	ko01100;ko01110;ko00940	Metabolic pathways;Biosynthesis of secondary metabolites;Phenylpropanoid biosynthesis
Solyc10g079300.2	Solyc10g079300.2	10.01496087346483	9.460087351245177	9.248117811777966	1.5909964173156628	2.2491162292488025	2.141525700025332	4.11302456431239	2.00643391242194	7.306271e-08	2.369529e-06	Q42883	Calcium-transporting ATPase, endoplasmic reticulum-type	NP_001234073.1;XP_010323824.1;XP_010323830.1;XP_010323817.1	calcium-transporting ATPase, endoplasmic reticulum-type;calcium-transporting ATPase, endoplasmic reticulum-type isoform X1;calcium-transporting ATPase, endoplasmic reticulum-type isoform X1;calcium-transporting ATPase, endoplasmic reticulum-type isoform X1	PF13246;PF00689;PF00690;PF00122;PF00702	Cation transport ATPase (P-type);Cation transporting ATPase, C-terminus;Cation transporter/ATPase, N-terminus;E1-E2 ATPase;haloacid dehalogenase-like hydrolase	IPR001757;IPR004014;IPR006068;IPR008250;IPR018303;IPR023214;IPR023298;IPR023299;IPR036412;IPR044492	P-type ATPase;Cation-transporting P-type ATPase, N-terminal;Cation-transporting P-type ATPase, C-terminal;P-type ATPase, A domain superfamily;P-type ATPase, phosphorylation site;HAD superfamily;P-type ATPase, transmembrane domain superfamily;P-type ATPase, cytoplasmic domain N;HAD-like superfamily;P-type ATPase, haloacid dehalogenase domain	KOG0202	Ca2+ transporting ATPase	GO:0046872;GO:0005789;GO:0006874;GO:0005783;GO:0070588;GO:0016887;GO:0016020;GO:0006816;GO:0005388;GO:0005524	molecular_function;cellular_component;biological_process;cellular_component;biological_process;molecular_function;cellular_component;biological_process;molecular_function;molecular_function	Binding to a metal ion.;The lipid bilayer surrounding the endoplasmic reticulum.;A homeostatic process involved in the maintenance of a steady state level of calcium ions within a cell.;The irregular network of unit membranes, visible only by electron microscopy, that occurs in the cytoplasm of many eukaryotic cells. The membranes form a complex meshwork of tubular channels, which are often expan…	K01537	-	-
Solyc01g097290.4	Solyc01g097290.4	128.11450784530513	119.4940702643581	104.40682213158868	33.529411751539534	33.20985581674232	29.30367225909258	6.2935116300377	1.61858849838466	7.442397e-08	2.401628e-06	G9HPW4	Auxin-responsive protein	NP_001266049.1	auxin-responsive protein IAA16	PF02309	AUX/IAA family	IPR000270;IPR003311;IPR033389	PB1 domain;AUX/IAA protein;AUX/IAA domain	ENOG502QPNB	-	GO:0009734;GO:0006355;GO:0005634	biological_process;biological_process;cellular_component	The series of molecular signals generated by the binding of the plant hormone auxin to a receptor, and ending with modulation of a downstream cellular process, e.g. transcription.;Any process that modulates the frequency, rate or extent of cellular DNA-templated transcription.;A membrane-bounded organelle of eukaryotic cells in which chromosomes are housed and replicated. In most cells, the nucle…	K14484	ko04075	Plant hormone signal transduction
Solyc05g051660.1	Solyc05g051660.1	204.22806520413585	169.7975091359659	188.06745331893256	55.54349280137671	64.77736139988193	59.47999306032868	6.8438762016473	1.39070944080653	7.553057e-08	2.418541e-06	K4C1J7	Acylsugar acylhydrolase 1	NP_001316336.1	acylsugar acylhydrolase 1	PF07859	alpha/beta hydrolase fold	IPR013094;IPR029058	Alpha/beta hydrolase fold-3;Alpha/Beta hydrolase fold	KOG1515	Arylacetamide deacetylase	GO:0016787	molecular_function	Catalysis of the hydrolysis of various bonds, e.g. C-O, C-N, C-C, phosphoric anhydride bonds, etc.	-	-	-
Solyc01g096220.3	Solyc01g096220.3	20.049965298291514	16.673761889128617	21.101363154431024	3.43254067622254	3.118839422179923	3.669747886614744	3.6597762279391	2.25297257665238	7.770126e-08	2.462317e-06	A0A3Q7EMQ5	Ras-related protein RABA3	XP_004230007.1	ras-related protein RABA3	PF00071	Ras family	IPR001806;IPR005225;IPR027417	Small GTPase;Small GTP-binding protein domain;P-loop containing nucleoside triphosphate hydrolase	-	-	GO:0005768;GO:0003924;GO:0005525;GO:0005794;GO:0005886	cellular_component;molecular_function;molecular_function;cellular_component;cellular_component	A vacuole to which materials ingested by endocytosis are delivered.;Catalysis of the reaction: GTP + H2O = GDP + H+ + phosphate.;Binding to GTP, guanosine triphosphate.;A membrane-bound cytoplasmic organelle of the endomembrane system that further processes the core oligosaccharides (e.g. N-glycans) added to proteins in the endoplasmic reticulum and packages them into membrane-bound vesicles. The…	K07904	ko04961;ko04972;ko05164;ko04144;ko04962	Endocrine and other factor-regulated calcium reabsorption;Pancreatic secretion;Influenza A;Endocytosis;Vasopressin-regulated water reabsorption
Solyc09g065590.3	Solyc09g065590.3	16.150652612721103	16.261509759189327	17.846983128050596	4.089877636038914	3.712385994385482	3.7829267411656695	4.16114990808222	1.86903419636671	7.801773e-08	2.464293e-06	A0A3Q7I614	PH domain-containing protein	XP_004247195.1	VAN3-binding protein	PF05703;PF08458	Auxin canalisation;Plant pleckstrin homology-like region	IPR008546;IPR013666;IPR040269	VAN3-binding protein-like, auxin canalisation domain;Pleckstrin-like, plant;VAN3-binding protein	-	-	GO:0009734;GO:0010087;GO:0010305	biological_process;biological_process;biological_process	The series of molecular signals generated by the binding of the plant hormone auxin to a receptor, and ending with modulation of a downstream cellular process, e.g. transcription.;The process whose specific outcome is the progression of phloem and/or xylem over time, from formation to the mature structure. An example of this process is found in Arabidopsis thaliana.;Vascular tissue pattern format…	-	-	-
Solyc08g007080.4	Solyc08g007080.4	10.518171243498212	9.834097703895246	9.621008274553022	2.836227080015952	3.282144170704676	3.179589894742953	4.0622423549852	1.43430932847555	7.96393e-08	2.499231e-06	A0A3Q7IEG9	Inositol polyphosphate-related phosphatase domain-containing protein	-	-	-	-	IPR000300;IPR036691;IPR045849	Inositol polyphosphate-related phosphatase;Endonuclease/exonuclease/phosphatase superfamily;Inositol polyphosphate 5-phosphatase, plant	-	-	GO:0034485;GO:0004439;GO:0004445;GO:0046856	molecular_function;molecular_function;molecular_function;biological_process	1,2-diacyl-sn-glycero-3-phospho-(1D-myo-inositol-3,4,5-trisphosphate) + H2O = 1,2-diacyl-sn-glycero-3-phospho-(1D-myo-inositol-3,4-bisphosphate) + phosphate.;Catalysis of the reaction: 1-phosphatidyl-1D-myo-inositol 4,5-bisphosphate + H2O = 1-phosphatidyl-1D-myo-inositol 4-phosphate + phosphate.;Catalysis of the reactions: D-myo-inositol 1,4,5-trisphosphate + H2O = myo-inositol 1,4-bisphosphate +…	-	-	-
Solyc04g008730.3	Solyc04g008730.3	32.66598454792339	30.17383759867121	30.278210768938795	10.758530749959208	10.55732870551274	10.60716088709752	5.03931812459981	1.29090514128255	8.044218e-08	2.504166e-06	A0A3Q7FZP1	Alpha-galactosidase	XP_004236880.1	alpha-galactosidase 1	PF16499;PF17801	Alpha galactosidase A;Alpha galactosidase C-terminal beta sandwich domain	IPR000111;IPR002241;IPR013780;IPR013785;IPR017853;IPR041233	Glycoside hydrolase family 27/36, conserved site;Glycoside hydrolase, family 27;Glycosyl hydrolase, all-beta;Aldolase-type TIM barrel;Glycoside hydrolase superfamily;Alpha galactosidase, C-terminal beta sandwich domain	-	-	GO:0016798;GO:0004553;GO:0009505;GO:0005975;GO:0015925;GO:0004557	molecular_function;molecular_function;cellular_component;biological_process;molecular_function;molecular_function	Catalysis of the hydrolysis of any glycosyl bond.;Catalysis of the hydrolysis of any O-glycosyl bond.;A more or less rigid structure lying outside the cell membrane of a cell and composed of cellulose and pectin and other organic and inorganic substances.;The chemical reactions and pathways involving carbohydrates, any of a group of organic compounds based of the general formula Cx(H2O)y.;Catalys…	K07407	ko00561;ko01100;ko00603;ko00052;ko00600	Glycerolipid metabolism;Metabolic pathways;Glycosphingolipid biosynthesis - globo and isoglobo series;Galactose metabolism;Sphingolipid metabolism
Solyc05g006650.3	Solyc05g006650.3	63.96684223528311	72.50541879882076	70.4022162913641	13.972814827782264	12.316709875189629	14.805478658768276	5.91292122805859	2.08227696595443	8.117789e-08	2.511705e-06	A0A3Q7H5D0	BHLH domain-containing protein	XP_004238742.1	transcription factor BHLH094	PF00010	Helix-loop-helix DNA-binding domain	IPR011598;IPR024097;IPR036638	Myc-type, basic helix-loop-helix (bHLH) domain;Basic helix-loop-helix leucine zipper transcription factor;Helix-loop-helix DNA-binding domain superfamily	-	-	GO:0003700;GO:0006355;GO:0005634;GO:0046983	molecular_function;biological_process;cellular_component;molecular_function	A transcription regulator activity that modulates transcription of gene sets via selective and non-covalent binding to a specific double-stranded genomic DNA sequence (sometimes referred to as a motif) within a cis-regulatory region. Regulatory regions include promoters (proximal and distal) and enhancers. Genes are transcriptional units, and include bacterial operons.;Any process that modulates …	-	-	-
Solyc10g080840.1	Solyc10g080840.1	37.56312470839004	30.392017749282275	31.560885775071743	7.305858019284469	8.669395134233621	9.170423751067382	4.92518904840552	1.72818350504673	8.198153e-08	2.530347e-06	A0A3Q7ILQ8	Cytochrome P450	XP_004249314.1	alkane hydroxylase MAH1-like	PF00067	Cytochrome P450	IPR001128;IPR002401;IPR017972;IPR036396	Cytochrome P450;Cytochrome P450, E-class, group I;Cytochrome P450, conserved site;Cytochrome P450 superfamily	-	-	GO:0020037;GO:0016020;GO:0005506;GO:0004497;GO:0046872;GO:0016705	molecular_function;cellular_component;molecular_function;molecular_function;molecular_function;molecular_function	Binding to a heme, a compound composed of iron complexed in a porphyrin (tetrapyrrole) ring.;A lipid bilayer along with all the proteins and protein complexes embedded in it and attached to it.;Binding to an iron (Fe) ion.;Catalysis of the incorporation of one atom from molecular oxygen into a compound and the reduction of the other atom of oxygen to water.;Binding to a metal ion.;Catalysis of an…	-	-	-
Solyc07g061720.3	Solyc07g061720.3	19.96025100302369	14.498029078792303	13.889759362239044	2.351754767056616	2.449789930850276	1.9203312043013985	3.56973157256992	2.58335183311056	8.206603e-08	2.530347e-06	P24157	1-aminocyclopropane-1-carboxylate oxidase 4	NP_001233928.1	1-aminocyclopropane-1-carboxylate oxidase 4	PF03171;PF14226	2OG-Fe(II) oxygenase superfamily;non-haem dioxygenase in morphine synthesis N-terminal	IPR005123;IPR026992;IPR027443;IPR044861	Oxoglutarate/iron-dependent dioxygenase;Non-haem dioxygenase N-terminal domain;Isopenicillin N synthase-like superfamily;Isopenicillin N synthase-like, Fe(2+) 2OG dioxygenase domain	KOG0143	Iron/ascorbate family oxidoreductases	GO:0002238;GO:0009805;GO:0031418;GO:0046872;GO:0016491;GO:0009835;GO:0009815;GO:0016706;GO:0009693	biological_process;biological_process;molecular_function;molecular_function;molecular_function;biological_process;molecular_function;molecular_function;biological_process	Any process that results in a change in state or activity of an organism (in terms of movement, secretion, enzyme production, gene expression, etc.) as a result of a stimulus by molecules of fungal origin such as chito-octamer oligosaccharide.;The chemical reactions and pathways resulting in the formation of coumarins, a class of compounds derived from the phenylacrylic skeleton of cinnamic acids…	K05933	ko00270;ko01110;ko01100	Cysteine and methionine metabolism;Biosynthesis of secondary metabolites;Metabolic pathways
Solyc10g005210.4	Solyc10g005210.4	25.59791517040264	21.75883368962653	24.2314404257969	7.378084541332114	7.708769685125328	7.698248700728804	4.5048389383394	1.39801256312927	8.775267e-08	2.642076e-06	A0A3Q7I9C5	DNA-3-methyladenine glycosylase I	-	-	PF03352	Methyladenine glycosylase	IPR005019;IPR011257	Methyladenine glycosylase;DNA glycosylase	-	-	GO:0006284;GO:0008725;GO:0046872	biological_process;molecular_function;molecular_function	In base excision repair, an altered base is removed by a DNA glycosylase enzyme, followed by excision of the resulting sugar phosphate. The small gap left in the DNA helix is filled in by the sequential action of DNA polymerase and DNA ligase.;Catalysis of the reaction: DNA containing 3-methyladenine + H2O = DNA with abasic site + 3-methyladenine. This reaction is the hydrolysis of DNA by cleavag…	-	-	-
Solyc05g046030.4	Solyc05g046030.4	12.478733677505373	10.05369749489786	12.123259580693368	1.0607251824238788	1.4712550043088688	1.7094824722370845	2.91220944251226	2.77066946597755	8.940117e-08	2.668574e-06	P15004	Suberization-associated anionic peroxidase 2	NP_001295320.1	suberization-associated anionic peroxidase 2 precursor	PF00141	Peroxidase	IPR000823;IPR002016;IPR010255;IPR019793;IPR019794;IPR033905	Plant peroxidase;Haem peroxidase;Haem peroxidase superfamily;Peroxidases heam-ligand binding site;Peroxidase, active site;Secretory peroxidase	ENOG502QU1K	-	GO:0042744;GO:0046872;GO:0004601;GO:0098869;GO:0006979;GO:0140825;GO:0005576;GO:0020037	biological_process;molecular_function;molecular_function;biological_process;biological_process;molecular_function;cellular_component;molecular_function	The chemical reactions and pathways resulting in the breakdown of hydrogen peroxide (H2O2).;Binding to a metal ion.;Catalysis of the reaction: a donor + a peroxide = an oxidized donor + 2 H2O.;Any process carried out at the cellular level that reduces or removes the toxicity superoxide radicals or hydrogen peroxide.;Any process that results in a change in state or activity of a cell or an organis…	K00430	ko01100;ko01110;ko00940	Metabolic pathways;Biosynthesis of secondary metabolites;Phenylpropanoid biosynthesis
Solyc05g051920.3	Solyc05g051920.3	2.796805335334245	2.6323756194385304	2.941187880166655	0.1513279862873648	0.2227468597770787	0.2536380263048752	1.28250332895544	3.45968968694179	9.236957e-08	2.739167e-06	A0A3Q7GMC9	Major facilitator superfamily (MFS) profile domain-containing protein	XP_004240239.1	uncharacterized protein LOC101255101	PF00083	Sugar (and other) transporter	IPR011701;IPR020846;IPR036259;IPR044770	Major facilitator superfamily;Major facilitator superfamily domain;MFS transporter superfamily;Protein spinster-like	-	-	GO:0016020;GO:0055085;GO:0022857	cellular_component;biological_process;molecular_function	A lipid bilayer along with all the proteins and protein complexes embedded in it and attached to it.;The process in which a solute is transported across a lipid bilayer, from one side of a membrane to the other.;Enables the transfer of a substance, usually a specific substance or a group of related substances, from one side of a membrane to the other.	-	-	-
Solyc12g019480.3	Solyc12g019480.3	3.82186018317171	3.9573408346058674	3.41059201268384	0.5169777085344728	0.4484252586535858	0.5845414464497393	2.45441782837709	2.60558354390699	9.353039e-08	2.760926e-06	A0A3Q7J6G7	Formin-like protein	-	-	PF02181	Formin Homology 2 Domain	IPR015425;IPR027643;IPR042201	Formin, FH2 domain;Formin-like family, plant;Formin, FH2 domain superfamily	-	-	GO:0045010;GO:0030036;GO:0051015;GO:0016020	biological_process;biological_process;molecular_function;cellular_component	The initial step in the formation of an actin filament, in which actin monomers combine to form a new filament. Nucleation is slow relative to the subsequent addition of more monomers to extend the filament.;A process that is carried out at the cellular level which results in the assembly, arrangement of constituent parts, or disassembly of cytoskeletal structures comprising actin filaments and t…	-	-	-
Solyc06g071500.3	Solyc06g071500.3	11.253353348895525	9.620114853608468	9.62051345398991	2.8038812057636595	3.3090592039194813	3.167009550149617	4.24631976978709	1.46016957016147	9.399529e-08	2.765163e-06	A0A3Q7H1H7	Bicarbonate transporter-like transmembrane domain-containing protein	XP_004241498.1	probable boron transporter 2	PF00955	HCO3- transporter family	IPR003020;IPR011531	Bicarbonate transporter, eukaryotic;Bicarbonate transporter-like, transmembrane domain	-	-	GO:0022857;GO:0016020;GO:0015698;GO:0055085;GO:0005886;GO:0005452;GO:0006820;GO:0050801	molecular_function;cellular_component;biological_process;biological_process;cellular_component;molecular_function;biological_process;biological_process	Enables the transfer of a substance, usually a specific substance or a group of related substances, from one side of a membrane to the other.;A lipid bilayer along with all the proteins and protein complexes embedded in it and attached to it.;The directed movement of inorganic anions into, out of or within a cell, or between cells, by means of some agent such as a transporter or pore. Inorganic a…	-	-	-
Solyc06g150109.1	Solyc06g150109.1	17.34072220440603	20.9458500704513	16.407091725224056	2.5286497514061144	2.30178778652614	2.3545682604091924	2.87474990741555	2.67884965611809	9.613146e-08	2.795564e-06	Q7Y040	MADS-box protein EJ2	NP_001234380.1	MADS-box protein 1	PF01486;PF00319	K-box region;SRF-type transcription factor (DNA-binding and dimerisation domain)	IPR002100;IPR002487;IPR033896;IPR036879	Transcription factor, MADS-box;Transcription factor, K-box;MADS MEF2-like;Transcription factor, MADS-box superfamily	KOG0014	MADS box transcription factor	GO:0000978;GO:0045944;GO:0046983;GO:0003677;GO:0003700;GO:0000981;GO:0005634;GO:0006357;GO:0000977	molecular_function;biological_process;molecular_function;molecular_function;molecular_function;molecular_function;cellular_component;biological_process;molecular_function	Binding to a specific upstream regulatory DNA sequence (transcription factor recognition sequence or binding site) located in cis relative to the transcription start site (i.e., on the same strand of DNA) of a gene transcribed by RNA polymerase II.;Any process that activates or increases the frequency, rate or extent of transcription from an RNA polymerase II promoter.;The formation of a protein …	K09264	-	-
Solyc01g094940.4	Solyc01g094940.4	90.72845100160193	86.43966281903606	84.057300863517	31.79432760701621	33.104859564231226	31.55414624023185	6.81130172976094	1.18426334112101	9.768849e-08	2.823503e-06	Q41328	Pto-interacting protein 1	NP_001233803.1;XP_010314665.1	pto-interacting protein 1;pto-interacting protein 1 isoform X1	PF07714	Protein tyrosine and serine/threonine kinase	IPR000719;IPR001245;IPR008271;IPR011009;IPR017441	Protein kinase domain;Serine-threonine/tyrosine-protein kinase, catalytic domain;Serine/threonine-protein kinase, active site;Protein kinase-like domain superfamily;Protein kinase, ATP binding site	KOG1187	Serine/threonine protein kinase	GO:0004672;GO:0005515;GO:0106310;GO:0004674;GO:0009626;GO:0005524	molecular_function;molecular_function;molecular_function;molecular_function;biological_process;molecular_function	Catalysis of the phosphorylation of an amino acid residue in a protein, usually according to the reaction: a protein + ATP = a phosphoprotein + ADP.;Binding to a protein.;Catalysis of the reactions: ATP + protein serine = ADP + protein serine phosphate.;Catalysis of the reactions: ATP + protein serine = ADP + protein serine phosphate, and ATP + protein threonine = ADP + protein threonine phosphat…	K13436	ko04626	Plant-pathogen interaction
Solyc01g097770.4	Solyc01g097770.4	23.564347368854712	23.680282716574684	21.81169042200141	7.275542092770811	6.764269305406342	6.322135387165465	5.62303103379316	1.50890041787581	1.013003e-07	2.886085e-06	Q0GA16	Phototropin-2	-	-	PF13426;PF00069	PAS domain;Protein kinase domain	IPR000014;IPR000700;IPR000719;IPR001610;IPR008271;IPR011009;IPR017441;IPR035965	PAS domain;PAS-associated, C-terminal;Protein kinase domain;PAC motif;Serine/threonine-protein kinase, active site;Protein kinase-like domain superfamily;Protein kinase, ATP binding site;PAS domain superfamily	-	-	GO:0009881;GO:0016301;GO:0004674;GO:0005524;GO:0009882;GO:0004672;GO:0005737;GO:0005634;GO:0005886;GO:0009785	molecular_function;molecular_function;molecular_function;molecular_function;molecular_function;molecular_function;cellular_component;cellular_component;cellular_component;biological_process	The function of absorbing and responding to incidental electromagnetic radiation, particularly visible light. The response may involve a change in conformation.;Catalysis of the transfer of a phosphate group, usually from ATP, to a substrate molecule.;Catalysis of the reactions: ATP + protein serine = ADP + protein serine phosphate, and ATP + protein threonine = ADP + protein threonine phosphate.…	-	-	-
Solyc08g081940.3	Solyc08g081940.3	24.048012052478875	25.81600441727841	24.672827028466003	7.1458963304107765	6.68458089827221	7.006336410173541	5.0785832179031	1.58836190075644	1.026653e-07	2.901674e-06	Q41328	Pto-interacting protein 1	NP_001233803.1;XP_010314665.1	pto-interacting protein 1;pto-interacting protein 1 isoform X1	PF07714	Protein tyrosine and serine/threonine kinase	IPR000719;IPR001245;IPR008271;IPR011009;IPR017441	Protein kinase domain;Serine-threonine/tyrosine-protein kinase, catalytic domain;Serine/threonine-protein kinase, active site;Protein kinase-like domain superfamily;Protein kinase, ATP binding site	KOG1187	Serine/threonine protein kinase	GO:0004672;GO:0005515;GO:0106310;GO:0004674;GO:0009626;GO:0005524	molecular_function;molecular_function;molecular_function;molecular_function;biological_process;molecular_function	Catalysis of the phosphorylation of an amino acid residue in a protein, usually according to the reaction: a protein + ATP = a phosphoprotein + ADP.;Binding to a protein.;Catalysis of the reactions: ATP + protein serine = ADP + protein serine phosphate.;Catalysis of the reactions: ATP + protein serine = ADP + protein serine phosphate, and ATP + protein threonine = ADP + protein threonine phosphat…	K13436	ko04626	Plant-pathogen interaction
Solyc06g053950.3	Solyc06g053950.3	60.43316414640265	61.55863520498015	53.04212012769606	13.441420421896291	11.319340619952635	12.395717143831234	3.69349960987272	1.98634183732684	1.056447e-07	2.956998e-06	A0A3Q7I8A8	HSF-type DNA-binding domain-containing protein	XP_004247676.1	heat stress transcription factor A-6b	PF00447	HSF-type DNA-binding	IPR000232;IPR027725;IPR036388;IPR036390	Heat shock factor (HSF)-type, DNA-binding;Heat shock transcription factor family;Winged helix-like DNA-binding domain superfamily;Winged helix DNA-binding domain superfamily	-	-	GO:0003700;GO:0006357;GO:0006355;GO:0005634;GO:0003677;GO:0034605;GO:0043565;GO:0000978	molecular_function;biological_process;biological_process;cellular_component;molecular_function;biological_process;molecular_function;molecular_function	A transcription regulator activity that modulates transcription of gene sets via selective and non-covalent binding to a specific double-stranded genomic DNA sequence (sometimes referred to as a motif) within a cis-regulatory region. Regulatory regions include promoters (proximal and distal) and enhancers. Genes are transcriptional units, and include bacterial operons.;Any process that modulates …	K09419	-	-
Solyc03g093360.3	Solyc03g093360.3	65.3493895802623	56.32111073821282	65.20199770182062	16.92020213901703	18.91871506237484	19.64369404826658	5.13965979152274	1.49907033048023	1.063142e-07	2.966702e-06	A0A3Q7FNP2	PLAT domain-containing protein	XP_004235174.1	PLAT domain-containing protein 3	PF06232	Embryo-specific protein 3, (ATS3)	IPR001024;IPR010417;IPR036392	PLAT/LH2 domain;Embryo-specific ATS3;PLAT/LH2 domain superfamily	-	-	-	-	-	-	-	-
Solyc11g071800.2	Solyc11g071800.2	19.89581891206623	16.829015371894247	17.921340249720632	5.307173487980344	6.28057482318542	5.587612757080247	4.23906517819997	1.41429182543945	1.070548e-07	2.983075e-06	A0A3Q7J1J0	Strictosidine synthase conserved region domain-containing protein	XP_004251214.1	protein STRICTOSIDINE SYNTHASE-LIKE 3	PF20067;PF03088	Strictosidine synthase-like, N-terminal;Strictosidine synthase	IPR011042;IPR018119	Six-bladed beta-propeller, TolB-like;Strictosidine synthase, conserved region	-	-	GO:0005773;GO:0016844;GO:0009058;GO:0016787	cellular_component;molecular_function;biological_process;molecular_function	A closed structure, found only in eukaryotic cells, that is completely surrounded by unit membrane and contains liquid material. Cells contain one or several vacuoles, that may have different functions from each other. Vacuoles have a diverse array of functions. They can act as a storage organelle for nutrients or waste products, as a degradative compartment, as a cost-effective way of increasing…	K21407	-	-
Solyc05g051640.4	Solyc05g051640.4	2.072235598770952	1.6857705941226564	2.158735736146716	0	0.0452163619285473	0.0286039418311521	1.65117794497364	5.88013301082213	1.083528e-07	3.006935e-06	Q8GUQ5	Brassinosteroid LRR receptor kinase	NP_001296180.1	brassinosteroid LRR receptor kinase precursor	PF20141;PF08263;PF00560;PF13855;PF00069	Brassinosteroid receptor island domain;Leucine rich repeat N-terminal domain;Leucine Rich Repeat;Leucine rich repeat;Protein kinase domain	IPR000719;IPR001611;IPR003591;IPR008271;IPR011009;IPR013210;IPR017441;IPR032675;IPR045381	Protein kinase domain;Leucine-rich repeat;Leucine-rich repeat, typical subtype;Serine/threonine-protein kinase, active site;Protein kinase-like domain superfamily;Leucine-rich repeat-containing N-terminal, plant-type;Protein kinase, ATP binding site;Leucine-rich repeat domain superfamily;Brassinosteroid receptor BRI1, island domain	ENOG502QRF2	-	GO:0005886;GO:0050832;GO:0004672;GO:0038023;GO:0009755;GO:0106310;GO:0009742;GO:0001578;GO:0005524;GO:0006952;GO:0009729;GO:0004674;GO:0005496;GO:0009647	cellular_component;biological_process;molecular_function;molecular_function;biological_process;molecular_function;biological_process;biological_process;molecular_function;biological_process;biological_process;molecular_function;molecular_function;biological_process	The membrane surrounding a cell that separates the cell from its external environment. It consists of a phospholipid bilayer and associated proteins.;Reactions triggered in response to the presence of a fungus that act to protect the cell or organism.;Catalysis of the phosphorylation of an amino acid residue in a protein, usually according to the reaction: a protein + ATP = a phosphoprotein + ADP…	K13415	ko04075	Plant hormone signal transduction
Solyc12g049250.2	Solyc12g049250.2	26.66477769517013	19.052320882050903	18.05271404996748	1.1500284376156982	1.2311138542923383	1.8496608415104057	2.35745948263153	3.6546900513025	1.084083e-07	3.006935e-06	A0A3Q7JAE7	Uncharacterized protein	-	-	-	-	-	-	-	-	-	-	-	-	-	-
Solyc03g078650.4	Solyc03g078650.4	34.322350973166635	35.67722620971944	34.97480950830206	11.12962654260219	10.738930520804566	10.72493710703018	5.07183709470389	1.43643298498272	1.084918e-07	3.006935e-06	A0A3Q7FJN8	Uncharacterized protein	XP_004235056.1	uncharacterized protein LOC101260516	PF04788	Protein of unknown function (DUF620)	IPR006873	Protein of unknown function DUF620	-	-	-	-	-	-	-	-
Solyc12g016220.3	Solyc12g016220.3	11.844582595354186	10.743745736109457	10.769374379081766	3.774854109198938	3.662792613546391	3.278898652412536	5.21297151694753	1.38410357719283	1.087472e-07	3.006935e-06	A0A3Q7J5T8	Uncharacterized protein	-	-	-	-	IPR032675	Leucine-rich repeat domain superfamily	-	-	GO:0098542	biological_process	Reactions triggered in response to the presence of another organism that act to protect the cell or organism from damage caused by that organism.	-	-	-
Solyc07g043110.2	Solyc07g043110.2	2.3780350901382232	2.8445918709080966	2.709152367628643	0	0.0255938658797533	0	0.912713893313084	7.35384429278083	1.114534e-07	3.057322e-06	K4D422	UDP-glycosyltransferase 73C4	-	-	PF00201	UDP-glucoronosyl and UDP-glucosyl transferase	IPR002213	UDP-glucuronosyl/UDP-glucosyltransferase	KOG1192	UDP-glucuronosyl and UDP-glucosyl transferase	GO:0047215;GO:0008194;GO:0005634;GO:0035251;GO:0010294;GO:0005737;GO:0016757	molecular_function;molecular_function;cellular_component;molecular_function;molecular_function;cellular_component;molecular_function	Catalysis of the reaction: (indol-3-yl)acetate + UDP-D-glucose = 1-O-(indol-3-ylacetyl)-beta-D-glucose + UDP.;Catalysis of the transfer of a glycosyl group from a UDP-sugar to a small hydrophobic molecule.;A membrane-bounded organelle of eukaryotic cells in which chromosomes are housed and replicated. In most cells, the nucleus contains all of the cell's chromosomes except the organellar chromoso…	-	-	-
Solyc04g008870.3	Solyc04g008870.3	27.886943503697747	28.836315728006397	30.02264132200077	6.852606397068448	6.724451498512032	5.35827614357639	4.24305015938504	1.94540970718581	1.148194e-07	3.105728e-06	A0A3Q7GPL8	Uncharacterized protein	XP_004236864.1	transcription factor SRM1-like	PF00249	Myb-like DNA-binding domain	IPR001005;IPR006447;IPR009057;IPR017884;IPR017930	SANT/Myb domain;Myb domain, plants;Homeobox-like domain superfamily;SANT domain;Myb domain	-	-	GO:0010597;GO:0009751;GO:0006355;GO:0009739;GO:0005634;GO:0000976;GO:0003677	biological_process;biological_process;biological_process;biological_process;cellular_component;molecular_function;molecular_function	The chemical reactions and pathways resulting in the formation of volatile molecules emitted from green plants, such as hexenal, hexenol and hexenyl acetate, from linoleic acid or linolenic acid.;Any process that results in a change in state or activity of a cell or an organism (in terms of movement, secretion, enzyme production, gene expression, etc.) as a result of a salicylic acid stimulus.;An…	-	-	-
Solyc12g049255.1	Solyc12g049255.1	21.41088973803425	15.659796061080751	15.091237099493991	2.1896705788315067	1.4991070976517358	1.7070075234665236	3.14180623941513	3.02809993801201	1.163837e-07	3.139285e-06	A0A3Q7JAE7	Uncharacterized protein	-	-	-	-	-	-	-	-	-	-	-	-	-	-
Solyc05g007480.1	Solyc05g007480.1	33.944263708357106	27.290189251018383	32.143670209715175	4.66390187165213	5.614414737216726	6.733057085952556	4.5748269343485	2.20202240627309	1.173919e-07	3.153321e-06	A0A3Q7GDL0	Phytochrome kinase substrate 1	XP_010320681.1	protein PHYTOCHROME KINASE SUBSTRATE 1	-	-	IPR039615	Protein PHYTOCHROME KINASE SUBSTRATE	-	-	GO:0009638	biological_process	The movement of an organism, or part of an organism, in response to a light stimulus, usually toward or away from it.	-	-	-
Solyc04g076970.3	Solyc04g076970.3	6.060579456679428	5.45489918664218	5.526363484535591	0.806366704223393	0.672593383687142	0.8009103712722602	1.54543714374569	2.65531214739648	1.183714e-07	3.17085e-06	A0A3Q7G895	DOG1 domain-containing protein	XP_004238547.1	protein DOG1-like 4	PF14144	Seed dormancy control	IPR025422	Transcription factor TGA like domain	-	-	GO:0043565;GO:0006351	molecular_function;biological_process	Binding to DNA of a specific nucleotide composition, e.g. GC-rich DNA binding, or with a specific sequence motif or type of DNA e.g. promotor binding or rDNA binding.;The synthesis of an RNA transcript from a DNA template.	-	-	-
Solyc01g007130.3	Solyc01g007130.3	5.329184000463282	4.283740534954763	4.161773802339268	0.612914731674109	0.768901996161189	0.4669522702099373	3.13868019967978	2.6264811749056	1.232966e-07	3.264371e-06	Q41328	Pto-interacting protein 1	NP_001233803.1;XP_010314665.1	pto-interacting protein 1;pto-interacting protein 1 isoform X1	PF07714	Protein tyrosine and serine/threonine kinase	IPR000719;IPR001245;IPR008271;IPR011009;IPR017441	Protein kinase domain;Serine-threonine/tyrosine-protein kinase, catalytic domain;Serine/threonine-protein kinase, active site;Protein kinase-like domain superfamily;Protein kinase, ATP binding site	KOG1187	Serine/threonine protein kinase	GO:0004672;GO:0005515;GO:0106310;GO:0004674;GO:0009626;GO:0005524	molecular_function;molecular_function;molecular_function;molecular_function;biological_process;molecular_function	Catalysis of the phosphorylation of an amino acid residue in a protein, usually according to the reaction: a protein + ATP = a phosphoprotein + ADP.;Binding to a protein.;Catalysis of the reactions: ATP + protein serine = ADP + protein serine phosphate.;Catalysis of the reactions: ATP + protein serine = ADP + protein serine phosphate, and ATP + protein threonine = ADP + protein threonine phosphat…	K13436	ko04626	Plant-pathogen interaction
Solyc09g089730.3	Solyc09g089730.3	7.164998066120512	6.443749583228488	5.926743366648548	0.5781188912599758	1.0011302233627268	0.6966482131335716	2.34996794430292	2.81564523074781	1.236831e-07	3.267998e-06	P10967	1-aminocyclopropane-1-carboxylate oxidase homolog	NP_001296142.1	1-aminocyclopropane-1-carboxylate oxidase homolog isoform 1	PF03171;PF14226	2OG-Fe(II) oxygenase superfamily;non-haem dioxygenase in morphine synthesis N-terminal	IPR005123;IPR026992;IPR027443;IPR044861	Oxoglutarate/iron-dependent dioxygenase;Non-haem dioxygenase N-terminal domain;Isopenicillin N synthase-like superfamily;Isopenicillin N synthase-like, Fe(2+) 2OG dioxygenase domain	KOG0143	Iron/ascorbate family oxidoreductases	GO:0002238;GO:0009805;GO:0016491;GO:0031418;GO:0046872;GO:0009835;GO:0016706;GO:0009693	biological_process;biological_process;molecular_function;molecular_function;molecular_function;biological_process;molecular_function;biological_process	Any process that results in a change in state or activity of an organism (in terms of movement, secretion, enzyme production, gene expression, etc.) as a result of a stimulus by molecules of fungal origin such as chito-octamer oligosaccharide.;The chemical reactions and pathways resulting in the formation of coumarins, a class of compounds derived from the phenylacrylic skeleton of cinnamic acids…	-	-	-
Solyc08g067030.3	Solyc08g067030.3	35.326269980644	30.499141759554544	28.156763563977613	7.684076994211995	8.553609761456597	9.331412984668694	4.87549089949272	1.62153612179132	1.271139e-07	3.335923e-06	A0A3Q7HRC2	DUF642 domain-containing protein	XP_004245192.1	uncharacterized protein LOC101262737	PF04862	Protein of unknown function (DUF642)	IPR006946;IPR008979	DUF642 L-galactono-1,4-lactone-responsive gene 2-like domain;Galactose-binding-like domain superfamily	-	-	-	-	-	-	-	-
Solyc05g024160.3	Solyc05g024160.3	16.40621230416376	14.012646207174452	15.630891480739283	4.488738083591662	4.31439453401556	4.554019958013053	3.81567589004154	1.53376673967651	1.282336e-07	3.356226e-06	A0A3Q7HBW2	Pyruvate dehydrogenase E1 component subunit beta	XP_010321111.1	pyruvate dehydrogenase E1 component subunit beta-1, mitochondrial-like	PF02780;PF02779	Transketolase, C-terminal domain;Transketolase, pyrimidine binding domain	IPR005475;IPR009014;IPR027110;IPR029061;IPR033248	Transketolase-like, pyrimidine-binding domain;Transketolase C-terminal/Pyruvate-ferredoxin oxidoreductase domain II;Pyruvate dehydrogenase E1 component subunit beta;Thiamin diphosphate-binding fold;Transketolase, C-terminal domain	-	-	GO:0004739;GO:0016491;GO:0045254;GO:0006086	molecular_function;molecular_function;cellular_component;biological_process	Catalysis of the reaction: pyruvate + lipoamide = S-acetyldihydrolipoamide + CO2.;Catalysis of an oxidation-reduction (redox) reaction, a reversible chemical reaction in which the oxidation state of an atom or atoms within a molecule is altered. One substrate acts as a hydrogen or electron donor and becomes oxidized, while the other acts as hydrogen or electron acceptor and becomes reduced.;A mul…	K00162	ko00020;ko04922;ko04066;ko01100;ko01200;ko05230;ko01130;ko01110;ko01120;ko00620;ko00010	Citrate cycle (TCA cycle);Glucagon signaling pathway;HIF-1 signaling pathway;Metabolic pathways;Carbon metabolism;Central carbon metabolism in cancer;Biosynthesis of antibiotics;Biosynthesis of secondary metabolites;Microbial metabolism in diverse environments;Pyruvate metabolism;Glycolysis / Gluconeogenesis
Solyc10g080390.2	Solyc10g080390.2	40.5494300648459	38.73563069667448	40.681220310454464	13.968396982959728	15.07194789648072	15.165170673070904	6.01305383246998	1.18849066366741	1.297018e-07	3.389444e-06	A0A3Q7ILF8	Protein kinase domain-containing protein	XP_004249275.1	serine/threonine-protein kinase Nek6-like isoform X2	PF00069	Protein kinase domain	IPR000719;IPR008271;IPR011009	Protein kinase domain;Serine/threonine-protein kinase, active site;Protein kinase-like domain superfamily	-	-	GO:0004674;GO:0005524;GO:0004672	molecular_function;molecular_function;molecular_function	Catalysis of the reactions: ATP + protein serine = ADP + protein serine phosphate, and ATP + protein threonine = ADP + protein threonine phosphate.;Binding to ATP, adenosine 5'-triphosphate, a universally important coenzyme and enzyme regulator.;Catalysis of the phosphorylation of an amino acid residue in a protein, usually according to the reaction: a protein + ATP = a phosphoprotein + ADP.	-	-	-
Solyc10g076180.1	Solyc10g076180.1	10.928502371600471	11.24238888016418	10.27593965863164	2.0390114591266477	1.6132083909797312	1.6138426891112367	2.55721153428457	2.37773106641108	1.303678e-07	3.398324e-06	A0A3Q7IIM8	Transcription repressor	XP_004249045.1	transcription repressor OFP1	PF13724;PF04844	DNA-binding domain;Transcriptional repressor, ovate	IPR006458;IPR025830;IPR038933	Ovate protein family, C-terminal;DNA-binding domain, ovate family-like;Ovate protein family	-	-	GO:0003677;GO:0005634;GO:0045892	molecular_function;cellular_component;biological_process	Any molecular function by which a gene product interacts selectively and non-covalently with DNA (deoxyribonucleic acid).;A membrane-bounded organelle of eukaryotic cells in which chromosomes are housed and replicated. In most cells, the nucleus contains all of the cell's chromosomes except the organellar chromosomes, and is the site of RNA synthesis and processing. In some species, or in special…	-	-	-
Solyc05g008300.3	Solyc05g008300.3	9.682897841843362	7.83926948402904	10.312649694312496	0.3634105294310593	0.8023818616766946	0.5075880305018845	1.96703849650901	3.74792942232754	1.321651e-07	3.431339e-06	A0A3Q7H6C5	HMA domain-containing protein	-	-	PF00403	Heavy-metal-associated domain	IPR006121;IPR036163	Heavy metal-associated domain, HMA;Heavy metal-associated domain superfamily	-	-	GO:0046872	molecular_function	Binding to a metal ion.	-	-	-
Solyc03g095780.3	Solyc03g095780.3	32.36342216062343	31.71939189603148	31.716743896859747	9.913431455486537	10.405807014714757	9.8362630993297	3.62743111098929	1.41526970820555	1.332793e-07	3.446425e-06	A0A3Q7GBQ4	Abscisic acid receptor PYL4	-	-	PF10604	Polyketide cyclase / dehydrase and lipid transport	IPR019587;IPR023393	Polyketide cyclase/dehydrase;START-like domain superfamily	-	-	GO:0010427;GO:0004864;GO:0009738;GO:0005737;GO:0005634;GO:0005886;GO:0038023	molecular_function;molecular_function;biological_process;cellular_component;cellular_component;cellular_component;molecular_function	Binding to abscisic acid, a plant hormone that regulates aspects of plant growth.;Binds to and stops, prevents or reduces the activity of a protein phosphatase.;The series of molecular signals generated by the binding of the plant hormone abscisic acid (ABA) to a receptor, and ending with modulation of a cellular process, e.g. transcription.;The contents of a cell excluding the plasma membrane an…	-	-	-
Solyc08g082190.3	Solyc08g082190.3	217.09413878269555	203.01841311030023	198.9257877385486	74.91762536891652	81.9494759625945	73.63830635225412	6.99474752202727	1.17249378333335	1.340934e-07	3.457159e-06	A0A3Q7HUT9	Glycine-rich protein	-	-	-	-	-	-	-	-	-	-	-	-	-	-
Solyc02g083490.3	Solyc02g083490.3	15.945491682212442	14.73052069382918	13.563539829006972	2.8453046204569707	3.580183497751589	3.675006722235763	3.23074434775057	1.87218822077061	1.342292e-07	3.457159e-06	P15003	Suberization-associated anionic peroxidase 1	NP_001296245.1	suberization-associated anionic peroxidase 1 precursor	PF00141	Peroxidase	IPR000823;IPR002016;IPR010255;IPR019793;IPR019794;IPR033905	Plant peroxidase;Haem peroxidase;Haem peroxidase superfamily;Peroxidases heam-ligand binding site;Peroxidase, active site;Secretory peroxidase	ENOG502QU1K	-	GO:0042744;GO:0046872;GO:0004601;GO:0098869;GO:0006979;GO:0140825;GO:0005576;GO:0020037	biological_process;molecular_function;molecular_function;biological_process;biological_process;molecular_function;cellular_component;molecular_function	The chemical reactions and pathways resulting in the breakdown of hydrogen peroxide (H2O2).;Binding to a metal ion.;Catalysis of the reaction: a donor + a peroxide = an oxidized donor + 2 H2O.;Any process carried out at the cellular level that reduces or removes the toxicity superoxide radicals or hydrogen peroxide.;Any process that results in a change in state or activity of a cell or an organis…	K00430	ko01100;ko01110;ko00940	Metabolic pathways;Biosynthesis of secondary metabolites;Phenylpropanoid biosynthesis
Solyc06g083070.3	Solyc06g083070.3	37.76016880769643	32.08056723781783	30.54862160812072	9.783076701637569	11.34473579108354	9.127470946612732	5.73978423518924	1.4747567658289	1.348879e-07	3.464921e-06	A0A3Q7HY74	Calponin-homology (CH) domain-containing protein	XP_004242438.1	fimbrin-2	PF00307	Calponin homology (CH) domain	IPR001715;IPR036872;IPR039959	Calponin homology domain;CH domain superfamily;Fimbrin/Plastin	-	-	GO:0005884;GO:0005737;GO:0032432;GO:0051639;GO:0051015;GO:0051017	cellular_component;cellular_component;cellular_component;biological_process;molecular_function;biological_process	A filamentous structure formed of a two-stranded helical polymer of the protein actin and associated proteins. Actin filaments are a major component of the contractile apparatus of skeletal muscle and the microfilaments of the cytoskeleton of eukaryotic cells. The filaments, comprising polymerized globular actin molecules, appear as flexible structures with a diameter of 5-9 nm. They are organize…	K17275	-	-
Solyc11g150107.1	Solyc11g150107.1	55.38410115212077	48.18000640903543	48.25586371803341	10.842303134952338	14.407702847538202	12.19918755875936	3.31867921142684	1.75850083638946	1.356529e-07	3.471307e-06	-	-	-	-	-	-	-	-	-	-	-	-	-	-	-	-
Solyc01g005010.4	Solyc01g005010.4	20.84911590378876	23.91735463786221	25.45455580894104	4.207963557603093	4.184178262625273	4.71026310850279	3.87414573262115	2.17646303555528	1.367229e-07	3.488952e-06	A0A3Q7E6Y9	Protein XRI1	-	-	-	-	IPR039933	Protein XRI1	-	-	GO:0007143;GO:0007140	biological_process;biological_process	A cell cycle process by which the cell nucleus divides as part of a meiotic cell cycle in the female germline.;A cell cycle process by which the cell nucleus divides as part of a meiotic cell cycle in the male germline.	-	-	-
Solyc12g008800.3	Solyc12g008800.3	34.351076039739105	26.04315994634221	29.234530558235985	5.986297760294763	7.639016204345198	5.664085258012205	4.14606066543264	1.95586983424383	1.424487e-07	3.613161e-06	A0A3Q7JRY2	Uncharacterized protein	XP_004251664.1	transcription factor MYBS3	PF00249	Myb-like DNA-binding domain	IPR001005;IPR006447;IPR009057;IPR017884;IPR017930	SANT/Myb domain;Myb domain, plants;Homeobox-like domain superfamily;SANT domain;Myb domain	-	-	GO:0010597;GO:0009723;GO:0006355;GO:0009739;GO:0000976;GO:0003677	biological_process;biological_process;biological_process;biological_process;molecular_function;molecular_function	The chemical reactions and pathways resulting in the formation of volatile molecules emitted from green plants, such as hexenal, hexenol and hexenyl acetate, from linoleic acid or linolenic acid.;Any process that results in a change in state or activity of a cell or an organism (in terms of movement, secretion, enzyme production, gene expression, etc.) as a result of an ethylene (ethene) stimulus…	-	-	-
Solyc04g010155.2	Solyc04g010155.2	8.50888231329616	9.504472357981465	8.796108488279675	1.6585617600456997	1.2627496197118713	1.3047350865339769	3.09971141521717	2.42319961954489	1.435815e-07	3.629461e-06	A0A3Q7G0G2	Btz domain-containing protein	-	-	-	-	-	-	-	-	-	-	-	-	-	-
Solyc06g076210.3	Solyc06g076210.3	6.792629491313741	7.438626007094546	7.909607737241566	1.284577219249788	0.9979382139549036	1.01893597234082	3.08041564065145	2.50536068467143	1.457839e-07	3.667098e-06	K4C9Y0	Factor of DNA methylation 1-5/IDN2 domain-containing protein	-	-	PF03469;PF03468;PF03470	XH domain;XS domain;XS zinc finger domain	IPR005379;IPR005380;IPR005381;IPR038588;IPR045177	Factor of DNA methylation 1-5/IDN2 , domain XH;XS domain;Zinc finger-XS domain;XS domain superfamily;Factor of DNA methylation 1-5/IDN2	ENOG502QWMB	-	GO:0080188;GO:0060255;GO:0031047	biological_process;biological_process;biological_process	A small RNA-based gene silencing process in which small interfering RNAs (siRNAs) guide DNA methylation to the siRNA-generating genomic loci and other loci that are homologous to the siRNAs for de novo DNA methylation. This results in a heterochromatin assembly, a chromatin conformation that is refractory to transcription. In general this process consists of three phases: biogenesis of siRNAs, sc…	-	-	-
Solyc08g077210.4	Solyc08g077210.4	70.23404633508392	66.9049118332842	68.52735097404576	25.264268878807037	25.57816977014313	25.979594481075253	6.72993636123357	1.16775004345503	1.477309e-07	3.701671e-06	A8IDV8	Inositol-1,4,5-triphosphate-5-phosphatase	NP_001234789.1	inositol-1,4,5-triphosphate-5-phosphatase	-	-	IPR000300;IPR036691;IPR045849	Inositol polyphosphate-related phosphatase;Endonuclease/exonuclease/phosphatase superfamily;Inositol polyphosphate 5-phosphatase, plant	KOG0565	Inositol polyphosphate 5-phosphatase and related proteins	GO:0034485;GO:0004439;GO:0004445;GO:0046856	molecular_function;molecular_function;molecular_function;biological_process	1,2-diacyl-sn-glycero-3-phospho-(1D-myo-inositol-3,4,5-trisphosphate) + H2O = 1,2-diacyl-sn-glycero-3-phospho-(1D-myo-inositol-3,4-bisphosphate) + phosphate.;Catalysis of the reaction: 1-phosphatidyl-1D-myo-inositol 4,5-bisphosphate + H2O = 1-phosphatidyl-1D-myo-inositol 4-phosphate + phosphate.;Catalysis of the reactions: D-myo-inositol 1,4,5-trisphosphate + H2O = myo-inositol 1,4-bisphosphate +…	-	-	-
Solyc07g062543.1	Solyc07g062543.1	8.349361982731775	7.211408726271484	8.375234492415572	1.6188160930658004	1.8286699768029255	1.822867106481284	2.63541189440826	1.92907611973347	1.519887e-07	3.783914e-06	-	-	-	-	-	-	-	-	-	-	-	-	-	-	-	-
Solyc04g050920.3	Solyc04g050920.3	35.50842849942984	31.82300469838037	33.17408596702436	12.410119059647142	12.335892971309706	12.525874383069633	5.15826337121144	1.17731067454913	1.529333e-07	3.802549e-06	A0A3Q7G4I6	Uncharacterized protein	XP_004237499.1	uncharacterized protein LOC101268176	-	-	-	-	-	-	-	-	-	-	-	-
Solyc07g061730.3	Solyc07g061730.3	22.75201140294408	18.27289062660488	19.617579316655306	4.986544479788206	6.250410815418745	5.69523943400941	3.97773876395661	1.58285199321046	1.532492e-07	3.803243e-06	P24157	1-aminocyclopropane-1-carboxylate oxidase 4	NP_001233928.1	1-aminocyclopropane-1-carboxylate oxidase 4	PF03171;PF14226	2OG-Fe(II) oxygenase superfamily;non-haem dioxygenase in morphine synthesis N-terminal	IPR005123;IPR026992;IPR027443;IPR044861	Oxoglutarate/iron-dependent dioxygenase;Non-haem dioxygenase N-terminal domain;Isopenicillin N synthase-like superfamily;Isopenicillin N synthase-like, Fe(2+) 2OG dioxygenase domain	KOG0143	Iron/ascorbate family oxidoreductases	GO:0002238;GO:0009805;GO:0031418;GO:0046872;GO:0016491;GO:0009835;GO:0009815;GO:0016706;GO:0009693	biological_process;biological_process;molecular_function;molecular_function;molecular_function;biological_process;molecular_function;molecular_function;biological_process	Any process that results in a change in state or activity of an organism (in terms of movement, secretion, enzyme production, gene expression, etc.) as a result of a stimulus by molecules of fungal origin such as chito-octamer oligosaccharide.;The chemical reactions and pathways resulting in the formation of coumarins, a class of compounds derived from the phenylacrylic skeleton of cinnamic acids…	K05933	ko00270;ko01110;ko01100	Cysteine and methionine metabolism;Biosynthesis of secondary metabolites;Metabolic pathways
Solyc11g020670.1	Solyc11g020670.1	35.715601900088224	30.501322374520925	28.720664539228263	7.528574043484682	8.214607192765627	6.032100956257655	4.38663599436962	1.86640640547926	1.533534e-07	3.803243e-06	A0A3Q7JKS5	TCP domain-containing protein	-	-	PF03634	TCP family transcription factor	IPR005333;IPR017887	Transcription factor, TCP;Transcription factor TCP subgroup	-	-	GO:0003700;GO:0006355;GO:0043565;GO:0005634	molecular_function;biological_process;molecular_function;cellular_component	A transcription regulator activity that modulates transcription of gene sets via selective and non-covalent binding to a specific double-stranded genomic DNA sequence (sometimes referred to as a motif) within a cis-regulatory region. Regulatory regions include promoters (proximal and distal) and enhancers. Genes are transcriptional units, and include bacterial operons.;Any process that modulates …	-	-	-
Solyc02g081250.3	Solyc02g081250.3	9.949044751894345	9.347900636737837	10.302244764497	3.174251786369994	3.610438489913733	3.518719870996972	5.52399013138116	1.27120887929666	1.547179e-07	3.832182e-06	A0A3Q7F5D1	FYVE-type domain-containing protein	-	-	PF08381;PF13713;PF01363;PF01535;PF13041;PF00415	Transcription factor regulating root and shoot growth via Pin3;Transcription factor BRX N-terminal domain;FYVE zinc finger;PPR repeat;PPR repeat family;Regulator of chromosome condensation (RCC1) repeat	IPR000306;IPR000408;IPR002885;IPR009091;IPR011011;IPR011990;IPR011993;IPR013083;IPR013591;IPR017455;IPR027988	FYVE zinc finger;Regulator of chromosome condensation, RCC1;Pentatricopeptide repeat;Regulator of chromosome condensation 1/beta-lactamase-inhibitor protein II;Zinc finger, FYVE/PHD-type;Tetratricopeptide-like helical domain superfamily;PH-like domain superfamily;Zinc finger, RING/FYVE/PHD-type;Brevis radix (BRX) domain;Zinc finger, FYVE-related;Transcription factor BREVIS RADIX, N-terminal domain	-	-	GO:0046872	molecular_function	Binding to a metal ion.	-	-	-
Solyc01g080070.4	Solyc01g080070.4	608.0303401148907	556.9530958184191	498.9801967432568	125.33427887713243	138.8355101005386	108.97631554338136	9.27135864479242	1.90344172132168	1.557001e-07	3.84179e-06	A0A3Q7F1A4	HMA domain-containing protein	-	-	PF00403	Heavy-metal-associated domain	IPR006121;IPR036163	Heavy metal-associated domain, HMA;Heavy metal-associated domain superfamily	-	-	GO:0046872	molecular_function	Binding to a metal ion.	-	-	-
Solyc12g045020.2	Solyc12g045020.2	65.49700294907277	58.54349917942867	56.94732225582826	22.29886582800428	24.20307091841418	21.005481468467167	6.09211789935258	1.16857073420239	1.616167e-07	3.948817e-06	A0A3Q7JAA6	Cytochrome P450	XP_004252382.1	cytochrome P450 CYP736A12	PF00067	Cytochrome P450	IPR001128;IPR002401;IPR017972;IPR036396	Cytochrome P450;Cytochrome P450, E-class, group I;Cytochrome P450, conserved site;Cytochrome P450 superfamily	-	-	GO:0020037;GO:0005506;GO:0004497;GO:0046872;GO:0016705	molecular_function;molecular_function;molecular_function;molecular_function;molecular_function	Binding to a heme, a compound composed of iron complexed in a porphyrin (tetrapyrrole) ring.;Binding to an iron (Fe) ion.;Catalysis of the incorporation of one atom from molecular oxygen into a compound and the reduction of the other atom of oxygen to water.;Binding to a metal ion.;Catalysis of an oxidation-reduction (redox) reaction in which hydrogen or electrons are transferred from each of two…	K20562	-	-
Solyc05g012280.3	Solyc05g012280.3	5.7292202626978765	4.710719284294146	5.624132313165425	0.4014303810155587	0.6237113837218148	0.6645234602222739	1.68917898846535	2.97645902090508	1.674733e-07	4.054659e-06	A0A3Q7GEK4	Wall-associated receptor kinase galacturonan-binding domain-containing protein	XP_004239462.2	uncharacterized protein LOC101263209	PF13947;PF14380	Wall-associated receptor kinase galacturonan-binding;Wall-associated receptor kinase C-terminal	IPR025287;IPR032872	Wall-associated receptor kinase, galacturonan-binding domain;Wall-associated receptor kinase, C-terminal	-	-	GO:0030247	molecular_function	Binding to a polysaccharide, a polymer of many (typically more than 10) monosaccharide residues linked glycosidically.	-	-	-
Solyc11g020280.2	Solyc11g020280.2	153.15455380631667	145.47934262419068	157.5158156493876	46.139562496996206	49.34331476779057	48.13578263574072	8.31969534862685	1.41562273398819	1.682168e-07	4.057707e-06	Q8GUQ5	Brassinosteroid LRR receptor kinase	NP_001296180.1	brassinosteroid LRR receptor kinase precursor	PF20141;PF08263;PF00560;PF13855;PF00069	Brassinosteroid receptor island domain;Leucine rich repeat N-terminal domain;Leucine Rich Repeat;Leucine rich repeat;Protein kinase domain	IPR000719;IPR001611;IPR003591;IPR008271;IPR011009;IPR013210;IPR017441;IPR032675;IPR045381	Protein kinase domain;Leucine-rich repeat;Leucine-rich repeat, typical subtype;Serine/threonine-protein kinase, active site;Protein kinase-like domain superfamily;Leucine-rich repeat-containing N-terminal, plant-type;Protein kinase, ATP binding site;Leucine-rich repeat domain superfamily;Brassinosteroid receptor BRI1, island domain	ENOG502QRF2	-	GO:0005886;GO:0050832;GO:0004672;GO:0038023;GO:0009755;GO:0106310;GO:0009742;GO:0001578;GO:0005524;GO:0006952;GO:0009729;GO:0004674;GO:0005496;GO:0009647	cellular_component;biological_process;molecular_function;molecular_function;biological_process;molecular_function;biological_process;biological_process;molecular_function;biological_process;biological_process;molecular_function;molecular_function;biological_process	The membrane surrounding a cell that separates the cell from its external environment. It consists of a phospholipid bilayer and associated proteins.;Reactions triggered in response to the presence of a fungus that act to protect the cell or organism.;Catalysis of the phosphorylation of an amino acid residue in a protein, usually according to the reaction: a protein + ATP = a phosphoprotein + ADP…	K13415	ko04075	Plant hormone signal transduction
Solyc09g090900.4	Solyc09g090900.4	34.58995561422143	25.89357822589557	27.428823799151186	4.985532051970166	7.201091212486828	6.007695039952101	4.95491622369774	2.01302945629787	1.692926e-07	4.078323e-06	A0A3Q7I8Z3	3-isopropylmalate dehydratase	-	-	PF00330	Aconitase family (aconitate hydratase)	IPR001030;IPR006251;IPR015931;IPR033941;IPR036008	Aconitase/3-isopropylmalate dehydratase large subunit, alpha/beta/alpha domain;Homoaconitase/3-isopropylmalate dehydratase, large subunit;Aconitase/3-isopropylmalate dehydratase large subunit, alpha/beta/alpha, subdomain 1/3;3-Isopropylmalate dehydratase, catalytic domain;Aconitase, iron-sulfur domain	-	-	GO:0016829;GO:0003861;GO:0009098;GO:0046872;GO:0051539;GO:0043436;GO:0008652	molecular_function;molecular_function;biological_process;molecular_function;molecular_function;biological_process;biological_process	Catalysis of the cleavage of C-C, C-O, C-N and other bonds by other means than by hydrolysis or oxidation, or conversely adding a group to a double bond. They differ from other enzymes in that two substrates are involved in one reaction direction, but only one in the other direction. When acting on the single substrate, a molecule is eliminated and this generates either a new double bond or a new…	-	-	-
Solyc06g005560.4	Solyc06g005560.4	79.19602575449875	58.80337103723112	64.21388859851167	13.08262077967082	17.77320089744459	13.340250578643314	5.48338988511625	1.93620159434382	1.707081e-07	4.092353e-06	Q9XGI6	Expansin	NP_001234881.1	expansin9 precursor	PF03330;PF01357	Lytic transglycolase;Expansin C-terminal domain	IPR002963;IPR007112;IPR007117;IPR007118;IPR009009;IPR036749;IPR036908	Expansin;Expansin/pollen allergen, DPBB domain;Expansin, cellulose-binding-like domain;Expansin/Lol pI;RlpA-like protein, double-psi beta-barrel domain;Expansin, cellulose-binding-like domain superfamily;RlpA-like domain superfamily	ENOG502QR06	-	GO:0009653;GO:0009664;GO:0016020;GO:0071555;GO:0005576	biological_process;biological_process;cellular_component;biological_process;cellular_component	The process in which anatomical structures are generated and organized. Morphogenesis pertains to the creation of form.;A process that results in the assembly and arrangement of constituent parts of the cellulose and pectin-containing cell wall, or in the disassembly of the cellulose and pectin-containing cell wall. This process is carried out at the cellular level. An example of this process is …	-	-	-
Solyc05g007120.4	Solyc05g007120.4	64.08063646567463	59.60433770725624	56.53815374178586	22.676553595061275	22.89773129567724	22.95230057497215	6.71292060587469	1.14046489195796	1.734107e-07	4.136687e-06	A0A3Q7H5N7	Protein kinase domain-containing protein	-	-	PF00560;PF13855;PF07714	Leucine Rich Repeat;Leucine rich repeat;Protein tyrosine and serine/threonine kinase	IPR000719;IPR001245;IPR001611;IPR011009;IPR032675	Protein kinase domain;Serine-threonine/tyrosine-protein kinase, catalytic domain;Leucine-rich repeat;Protein kinase-like domain superfamily;Leucine-rich repeat domain superfamily	-	-	GO:0005524;GO:0016020;GO:0004672;GO:0098542;GO:0005886	molecular_function;cellular_component;molecular_function;biological_process;cellular_component	Binding to ATP, adenosine 5'-triphosphate, a universally important coenzyme and enzyme regulator.;A lipid bilayer along with all the proteins and protein complexes embedded in it and attached to it.;Catalysis of the phosphorylation of an amino acid residue in a protein, usually according to the reaction: a protein + ATP = a phosphoprotein + ADP.;Reactions triggered in response to the presence of …	-	-	-
Solyc07g042190.3	Solyc07g042190.3	66.00471074167436	57.90458187185096	72.90002033687036	11.037028406772604	13.230378680472906	15.158009273690835	5.64119393567366	2.06833313552894	1.740251e-07	4.146243e-06	A0A3Q7I5X4	FLZ-type domain-containing protein	XP_004243694.1	protein MARD1	PF04570	zinc-finger of the FCS-type, C2-C2	IPR007650;IPR044604	Zf-FLZ domain;FCS-Like Zinc finger 12/13/14	-	-	-	-	-	-	-	-
Solyc10g050460.1	Solyc10g050460.1	18.51389163180744	15.995798815411725	15.121308909432404	1.448297845232604	1.0659092378156092	0.8990611520654294	0.860276999892222	3.59645204809507	1.75925e-07	4.173067e-06	A0A3Q7IG82	Uncharacterized protein	-	-	-	-	-	-	-	-	GO:0016020	cellular_component	A lipid bilayer along with all the proteins and protein complexes embedded in it and attached to it.	-	-	-
Solyc05g005570.3	Solyc05g005570.3	54.246595135041936	42.74369400536992	43.16184728218278	12.506669490134222	15.420220238914473	14.288499987019229	5.95565199322346	1.47462761405237	1.760116e-07	4.173067e-06	Q40161	Polygalacturonase-1 non-catalytic subunit beta	NP_001234835.1	polygalacturonase-1 non-catalytic subunit beta precursor	PF03181	BURP domain	IPR004873	BURP domain	ENOG502QT2V	-	GO:0048046;GO:0009835;GO:0071555	cellular_component;biological_process;biological_process	The cell membranes and intracellular regions in a plant are connected through plasmodesmata, and plants may be described as having two major compartments: the living symplast and the non-living apoplast. The apoplast is external to the plasma membrane and includes cell walls, intercellular spaces and the lumen of dead structures such as xylem vessels. Water and solutes pass freely through it.;An …	-	-	-
Solyc11g008810.2	Solyc11g008810.2	3.243714466951583	2.990114566227748	2.71917758408709	0.3485287028972292	0.5130159729021536	0.4172589168837534	1.73190530187609	2.5285079003282	1.807692e-07	4.259828e-06	A0A3Q7IRM3	Beta-hexosaminidase	XP_010312625.1;XP_004250088.1;XP_010312626.1	-;-;-	PF14845;PF00728	beta-acetyl hexosaminidase like;Glycosyl hydrolase family 20, catalytic domain	IPR015883;IPR017853;IPR025705;IPR029018;IPR029019	Glycoside hydrolase family 20, catalytic domain;Glycoside hydrolase superfamily;Beta-hexosaminidase;Beta-hexosaminidase-like, domain 2;Beta-hexosaminidase, eukaryotic type, N-terminal	-	-	GO:0016798;GO:0004563;GO:0102148;GO:0016020;GO:0005975;GO:0030203	molecular_function;molecular_function;molecular_function;cellular_component;biological_process;biological_process	Catalysis of the hydrolysis of any glycosyl bond.;Catalysis of the hydrolysis of terminal non-reducing N-acetyl-D-hexosamine residues in N-acetyl-beta-D-hexosaminides.;Catalysis of the reaction: H2O + an N-acetyl-beta-D-galactosalaminyl-[glycan] = N-acetyl-beta-D-galactosamine + a glycan.;A lipid bilayer along with all the proteins and protein complexes embedded in it and attached to it.;The chem…	-	-	-
Solyc01g066740.3	Solyc01g066740.3	16.19704475270646	14.758674619375812	15.767343329666309	4.855171247790167	5.474656401914997	5.754845298329259	5.48062877354572	1.28580031879431	1.821753e-07	4.274766e-06	A0A3Q7EFX8	Uncharacterized protein	XP_004229247.1	putative E3 ubiquitin-protein ligase LIN	PF00400	WD domain, G-beta repeat	IPR001680;IPR015943;IPR016024;IPR019775;IPR036322	WD40 repeat;WD40/YVTN repeat-like-containing domain superfamily;Armadillo-type fold;WD40 repeat, conserved site;WD40-repeat-containing domain superfamily	-	-	-	-	-	-	-	-
Solyc11g069270.2	Solyc11g069270.2	9.751953829411036	7.707078913623176	8.143415423125763	2.183392922204879	2.556463539806332	2.556752339061446	3.97635653795613	1.55375808195797	1.845568e-07	4.307214e-06	P48980	Beta-galactosidase	NP_001234465.1	beta-galactosidase precursor	PF21467;PF02140;PF17834;PF01301	Beta-galactosidase, galactose-binding domain;Galactose binding lectin domain;Beta-sandwich domain in beta galactosidase;Glycosyl hydrolases family 35	IPR000922;IPR001944;IPR008979;IPR017853;IPR019801;IPR031330;IPR041392;IPR043159;IPR048913	D-galactoside/L-rhamnose binding SUEL lectin domain;Glycoside hydrolase, family 35;Galactose-binding-like domain superfamily;Glycoside hydrolase superfamily;Glycoside hydrolase, family 35, conserved site;Glycoside hydrolase 35, catalytic domain;Beta-galactosidase, beta-sandwich domain;D-galactoside/L-rhamnose binding SUEL lectin domain superfamily;Beta-galactosidase, galactose-binding domain	KOG0496	Beta-galactosidase	GO:0005975;GO:0005773;GO:0016798;GO:0030246;GO:0004553;GO:0004565	biological_process;cellular_component;molecular_function;molecular_function;molecular_function;molecular_function	The chemical reactions and pathways involving carbohydrates, any of a group of organic compounds based of the general formula Cx(H2O)y.;A closed structure, found only in eukaryotic cells, that is completely surrounded by unit membrane and contains liquid material. Cells contain one or several vacuoles, that may have different functions from each other. Vacuoles have a diverse array of functions. …	-	-	-
Solyc01g087500.3	Solyc01g087500.3	3.6818404508314937	4.026702259899683	3.736085427855656	1.0172679506862965	1.037237265634212	1.036038835659646	3.44802517521458	1.63798959019573	1.875119e-07	4.350007e-06	A0A3Q7EJJ5	DNA topoisomerase 2	XP_010324649.1	DNA topoisomerase 2 isoform X1	PF00204;PF00521;PF02518;PF01751;PF16898	DNA gyrase B;DNA gyrase/topoisomerase IV, subunit A;Histidine kinase-, DNA gyrase B-, and HSP90-like ATPase;Toprim domain;C-terminal associated domain of TOPRIM	IPR001154;IPR001241;IPR002205;IPR003594;IPR006171;IPR013506;IPR013757;IPR013758;IPR013759;IPR013760;IPR014721;IPR018522;IPR020568;IPR031660;IPR034157;IPR036890	DNA topoisomerase II, eukaryotic-type;DNA topoisomerase, type IIA;DNA topoisomerase, type IIA, domain A;Histidine kinase/HSP90-like ATPase;TOPRIM domain;DNA topoisomerase, type IIA, subunit B, domain 2;DNA topoisomerase, type IIA, alpha-helical domain superfamily;DNA topoisomerase, type IIA, domain A, alpha-beta;DNA topoisomerase, type IIA, subunit B, C-terminal;DNA topoisomerase, type IIA-like d…	-	-	GO:0006265;GO:0000819;GO:0005524;GO:0003916;GO:0005634;GO:0046872;GO:0003677;GO:0003918;GO:0000712	biological_process;biological_process;molecular_function;molecular_function;cellular_component;molecular_function;molecular_function;molecular_function;biological_process	The process in which a transformation is induced in the topological structure of a double-stranded DNA helix, resulting in a change in linking number.;The cell cycle process in which sister chromatids are organized and then physically separated and apportioned to two or more sets.;Binding to ATP, adenosine 5'-triphosphate, a universally important coenzyme and enzyme regulator.;Catalysis of the tr…	-	-	-
Solyc01g100530.3	Solyc01g100530.3	12.237056889918277	11.229463838913816	14.039612427635667	2.1193554102097765	2.592478567723687	2.8444917838721917	4.59539677191576	2.06077178065228	1.885919e-07	4.364619e-06	A0A3Q7ENZ5	Cyclin-like domain-containing protein	XP_004230310.1	-	PF21052	EFR3, armadillo repeat	IPR016024;IPR049152	Armadillo-type fold;EFR3-like, armadillo repeat	-	-	-	-	-	-	-	-
Solyc07g056670.3	Solyc07g056670.3	42.43879592882754	31.973959921624417	28.03565853938069	5.607363269272664	6.24843346305702	4.559472915526684	4.54465872327943	2.37863174784522	1.90526e-07	4.39241e-06	P05116	1-aminocyclopropane-1-carboxylate oxidase 1	NP_001234024.2	1-aminocyclopropane-1-carboxylate oxidase 1	PF03171;PF14226	2OG-Fe(II) oxygenase superfamily;non-haem dioxygenase in morphine synthesis N-terminal	IPR005123;IPR026992;IPR027443;IPR044861	Oxoglutarate/iron-dependent dioxygenase;Non-haem dioxygenase N-terminal domain;Isopenicillin N synthase-like superfamily;Isopenicillin N synthase-like, Fe(2+) 2OG dioxygenase domain	KOG0143	Iron/ascorbate family oxidoreductases	GO:0002238;GO:0009805;GO:0031418;GO:0046872;GO:0016491;GO:0009835;GO:0009815;GO:0016706;GO:0009693	biological_process;biological_process;molecular_function;molecular_function;molecular_function;biological_process;molecular_function;molecular_function;biological_process	Any process that results in a change in state or activity of an organism (in terms of movement, secretion, enzyme production, gene expression, etc.) as a result of a stimulus by molecules of fungal origin such as chito-octamer oligosaccharide.;The chemical reactions and pathways resulting in the formation of coumarins, a class of compounds derived from the phenylacrylic skeleton of cinnamic acids…	K05933	ko00270;ko01110;ko01100	Cysteine and methionine metabolism;Biosynthesis of secondary metabolites;Metabolic pathways
Solyc09g075460.3	Solyc09g075460.3	51.99028692626518	45.0657642327708	45.14178989278757	17.56130882012368	19.98535823549927	18.093543834659634	5.85599831733324	1.09929476596177	1.907652e-07	4.39241e-06	P05117	Polygalacturonase-2	NP_001234021.1	polygalacturonase-2 precursor	PF00295	Glycosyl hydrolases family 28	IPR000743;IPR006626;IPR011050;IPR012334	Glycoside hydrolase, family 28;Parallel beta-helix repeat;Pectin lyase fold/virulence factor;Pectin lyase fold	ENOG502QRJW	-	GO:0004650;GO:0005975;GO:0016798;GO:0009901;GO:0048046;GO:0010047;GO:0009835;GO:0071555;GO:0004553;GO:0045490	molecular_function;biological_process;molecular_function;biological_process;cellular_component;biological_process;biological_process;biological_process;molecular_function;biological_process	Catalysis of the random hydrolysis of (1->4)-alpha-D-galactosiduronic linkages in pectate and other galacturonans.;The chemical reactions and pathways involving carbohydrates, any of a group of organic compounds based of the general formula Cx(H2O)y.;Catalysis of the hydrolysis of any glycosyl bond.;The dehiscence of an anther to release the pollen grains contained within it.;The cell membranes a…	K01184	ko00040;ko01100	Pentose and glucuronate interconversions;Metabolic pathways
Solyc02g065570.1	Solyc02g065570.1	176.66267677580112	197.28151872341127	188.4347725636961	47.954750875479554	56.3748	51.54617271841796	4.14417526046021	1.60008314194719	1.914011e-07	4.392939e-06	A0A3Q7F0G0	Uncharacterized protein	XP_010317140.1	uncharacterized protein LOC104645948	PF08137	DVL family	IPR012552	DVL	-	-	GO:0005886;GO:0048367;GO:0008285	cellular_component;biological_process;biological_process	The membrane surrounding a cell that separates the cell from its external environment. It consists of a phospholipid bilayer and associated proteins.;The process whose specific outcome is the progression of the shoot system over time, from its formation to the mature structure.;Any process that stops, prevents or reduces the rate or extent of cell proliferation.	-	-	-
Solyc04g082050.3	Solyc04g082050.3	26.354573750404324	24.04702883940521	26.95696117053116	8.255665617363158	9.14461676337659	7.959089199698614	4.29118452117835	1.35679187860304	2.006469e-07	4.540661e-06	A0A3Q7GC89	CRAL-TRIO domain-containing protein	XP_010320447.1	-	PF13716	Divergent CRAL/TRIO domain	IPR001251;IPR036865	CRAL-TRIO lipid binding domain;CRAL-TRIO lipid binding domain superfamily	-	-	-	-	-	-	-	-
Solyc03g120840.3	Solyc03g120840.3	23.9654520111011	19.57885775006395	26.629012715379936	4.201994814968195	4.832121878097428	4.462939558852791	3.33550594297121	2.12537230341765	2.027271e-07	4.573039e-06	A0A3Q7GKP5	AP2/ERF domain-containing protein	-	-	PF00847	AP2 domain	IPR001471;IPR016177;IPR036955	AP2/ERF domain;DNA-binding domain superfamily;AP2/ERF domain superfamily	-	-	GO:0003700;GO:0006355;GO:0006952;GO:0005634;GO:0003677	molecular_function;biological_process;biological_process;cellular_component;molecular_function	A transcription regulator activity that modulates transcription of gene sets via selective and non-covalent binding to a specific double-stranded genomic DNA sequence (sometimes referred to as a motif) within a cis-regulatory region. Regulatory regions include promoters (proximal and distal) and enhancers. Genes are transcriptional units, and include bacterial operons.;Any process that modulates …	-	-	-
Solyc11g007690.3	Solyc11g007690.3	18.41672703045836	16.036309159734405	16.158798247572616	4.727054134512203	5.734211201215471	5.7287500036817445	4.47723632388456	1.38912993219535	2.059691e-07	4.628697e-06	A0A3Q7IT40	Pyruvate kinase	XP_004246578.1	pyruvate kinase 1, cytosolic	PF00224;PF02887	Pyruvate kinase, barrel domain;Pyruvate kinase, alpha/beta domain	IPR001697;IPR011037;IPR015793;IPR015795;IPR015806;IPR015813;IPR036918;IPR040442	Pyruvate kinase;Pyruvate kinase-like, insert domain superfamily;Pyruvate kinase, barrel;Pyruvate kinase, C-terminal;Pyruvate kinase, insert domain superfamily;Pyruvate/Phosphoenolpyruvate kinase-like domain superfamily;Pyruvate kinase, C-terminal domain superfamily;Pyruvate kinase-like domain superfamily	-	-	GO:0032787;GO:0016301;GO:0004743;GO:0030955;GO:0005524;GO:0005737;GO:0016740;GO:0000287;GO:0046872;GO:0006096	biological_process;molecular_function;molecular_function;molecular_function;molecular_function;cellular_component;molecular_function;molecular_function;molecular_function;biological_process	The chemical reactions and pathways involving monocarboxylic acids, any organic acid containing one carboxyl (COOH) group or anion (COO-).;Catalysis of the transfer of a phosphate group, usually from ATP, to a substrate molecule.;Catalysis of the reaction: = ADP + H+ + phosphoenolpyruvate => ATP + pyruvate.;Binding to a potassium ion (K+).;Binding to ATP, adenosine 5'-triphosphate, a universally …	K00873	ko00010;ko01100;ko00230;ko01230;ko01200;ko05203;ko01110;ko05165;ko05230;ko01120;ko04930;ko01130;ko04922;ko00620	Glycolysis / Gluconeogenesis;Metabolic pathways;Purine metabolism;Biosynthesis of amino acids;Carbon metabolism;Viral carcinogenesis;Biosynthesis of secondary metabolites;Human papillomavirus infection;Central carbon metabolism in cancer;Microbial metabolism in diverse environments;Type II diabetes mellitus;Biosynthesis of antibiotics;Glucagon signaling pathway;Pyruvate metabolism
Solyc01g005080.3	Solyc01g005080.3	55.586982311501465	52.76496807642303	53.698998774173866	21.216345127125138	21.19134286916957	21.185673253389147	6.47035563165433	1.0963259214089	2.098424e-07	4.695011e-06	A0A3Q7E728	65-kDa microtubule-associated protein 6	XP_010316535.1;XP_010316528.1;XP_010316533.1	65-kDa microtubule-associated protein 6 isoform X1;65-kDa microtubule-associated protein 6 isoform X1;65-kDa microtubule-associated protein 6 isoform X1	PF03999	Microtubule associated protein (MAP65/ASE1 family)	IPR007145	Microtubule-associated protein, MAP65/Ase1/PRC1	-	-	GO:0005819;GO:0008017;GO:0005737;GO:0000226	cellular_component;molecular_function;cellular_component;biological_process	The array of microtubules and associated molecules that forms between opposite poles of a eukaryotic cell during mitosis or meiosis and serves to move the duplicated chromosomes apart.;Binding to a microtubule, a filament composed of tubulin monomers.;The contents of a cell excluding the plasma membrane and nucleus, but including other subcellular structures.;A process that is carried out at the …	K16732	-	-
Solyc04g009510.4	Solyc04g009510.4	22.176777581711963	21.93136562884014	21.115968759601984	7.977683207372408	9.07831280989861	8.175893430758675	5.45590982069861	1.11838096398572	2.098883e-07	4.695011e-06	A0A3Q7G057	RING-type domain-containing protein	-	-	PF00808;PF14570	Histone-like transcription factor (CBF/NF-Y) and archaeal histone;RING/Ubox like zinc-binding domain	IPR001841;IPR003956;IPR003958;IPR009072;IPR013083;IPR035979;IPR039515;IPR039780	Zinc finger, RING-type;Transcription factor, NFYB/HAP3, conserved site;Transcription factor CBF/NF-Y/archaeal histone domain;Histone-fold;Zinc finger, RING/FYVE/PHD-type;RNA-binding domain superfamily;NOT4, modified RING finger, HC subclass (C4C4-type);CCR4-NOT transcription complex subunit 4	-	-	GO:0016567;GO:0046982;GO:0006355;GO:0004842;GO:0005634;GO:0043565;GO:0030014	biological_process;molecular_function;biological_process;molecular_function;cellular_component;molecular_function;cellular_component	The process in which one or more ubiquitin groups are added to a protein.;Binding to a nonidentical protein to form a heterodimer.;Any process that modulates the frequency, rate or extent of cellular DNA-templated transcription.;Catalysis of the transfer of ubiquitin from one protein to another via the reaction X-Ub + Y = Y-Ub + X, where both X-Ub and Y-Ub are covalent linkages.;A membrane-bounde…	-	-	-
Solyc03g114030.3	Solyc03g114030.3	10.2087285947123	9.443606659337911	8.098750530958212	1.6271311443830645	2.127184087640716	1.4154349702734434	3.59470750249386	2.15936695132691	2.128138e-07	4.749495e-06	A0A3Q7FR52	Nucleobase-ascorbate transporter 6	NP_001334915.1;NP_001334914.1;NP_001334913.1	permease I-like protein;permease I-like protein;permease I-like protein	PF00860	Permease family	IPR006043	Nucleobase cation symporter 2 family	-	-	GO:0022857;GO:0055085;GO:0016020	molecular_function;biological_process;cellular_component	Enables the transfer of a substance, usually a specific substance or a group of related substances, from one side of a membrane to the other.;The process in which a solute is transported across a lipid bilayer, from one side of a membrane to the other.;A lipid bilayer along with all the proteins and protein complexes embedded in it and attached to it.	K14611	-	-
Solyc12g036267.1	Solyc12g036267.1	3.812499208060901	3.62877665694222	3.313484322357953	0.2218113817022906	0.0652989442986139	0.1239246452846943	1.04036486715325	4.48958984199341	2.16191e-07	4.794941e-06	A0A3Q7J167	C3H1-type domain-containing protein	XP_004251186.1;XP_010313443.1	zinc finger CCCH domain-containing protein 39-like;zinc finger CCCH domain-containing protein 39-like	PF00642;PF18044	Zinc finger C-x8-C-x5-C-x3-H type (and similar);CCCH-type zinc finger	IPR000571;IPR036855;IPR041367;IPR045877	Zinc finger, CCCH-type;Zinc finger, CCCH-type superfamily;E3 ligase, CCCH-type zinc finger;RNA-binding protein ZFP36-like	-	-	GO:0006355;GO:0046872;GO:0003677;GO:0003729	biological_process;molecular_function;molecular_function;molecular_function	Any process that modulates the frequency, rate or extent of cellular DNA-templated transcription.;Binding to a metal ion.;Any molecular function by which a gene product interacts selectively and non-covalently with DNA (deoxyribonucleic acid).;Binding to messenger RNA (mRNA), an intermediate molecule between DNA and protein. mRNA includes UTR and coding sequences, but does not contain introns.	-	-	-
Solyc05g009470.4	Solyc05g009470.4	46.51616047719615	45.82021772581997	48.747814135918816	16.52052815488683	17.0512549127488	17.366295209775423	6.64358570446152	1.21835673234118	2.168799e-07	4.801563e-06	A0A3Q7GFG8	Alpha-glucosidase	XP_004238937.1	alpha-xylosidase 1	PF13802;PF01055;PF21365	Glycosyl hydrolase 31 N-terminal galactose mutarotase-like domain;Glycosyl hydrolases family 31 TIM-barrel domain;Glycosyl hydrolase family 31 C-terminal domain	IPR000322;IPR011013;IPR013780;IPR017853;IPR025887;IPR030458;IPR048395	Glycoside hydrolase family 31, TIM barrel domain;Galactose mutarotase-like domain superfamily;Glycosyl hydrolase, all-beta;Glycoside hydrolase superfamily;Glycoside hydrolase family 31, N-terminal domain;Glycosyl hydrolases family 31, active site;Glycosyl hydrolase family 31, C-terminal domain	-	-	GO:0030246;GO:0016798;GO:0004553;GO:0005975	molecular_function;molecular_function;molecular_function;biological_process	Binding to a carbohydrate, which includes monosaccharides, oligosaccharides and polysaccharides as well as substances derived from monosaccharides by reduction of the carbonyl group (alditols), by oxidation of one or more hydroxy groups to afford the corresponding aldehydes, ketones, or carboxylic acids, or by replacement of one or more hydroxy group(s) by a hydrogen atom. Cyclitols are generally…	K15925	-	-
Solyc08g005610.3	Solyc08g005610.3	7.606778587170496	7.068714022313609	7.482061373066346	1.82378247177439	2.122215689704952	2.203104805061232	3.19656998848663	1.59569255701734	2.18628e-07	4.818263e-06	K4CI52	Abscisic acid 8'-hydroxylase CYP707A2	XP_004244436.1	-	PF00067	Cytochrome P450	IPR001128;IPR002401;IPR017972;IPR036396	Cytochrome P450;Cytochrome P450, E-class, group I;Cytochrome P450, conserved site;Cytochrome P450 superfamily	KOG0157	Cytochrome P450 CYP4/CYP19/CYP26 subfamilies	GO:0046872;GO:0010295;GO:0009687;GO:0016709;GO:0046345;GO:0009835;GO:0016705;GO:0020037;GO:0016125;GO:0005506;GO:0016020;GO:0004497;GO:0009414;GO:0009737	molecular_function;molecular_function;biological_process;molecular_function;biological_process;biological_process;molecular_function;molecular_function;biological_process;molecular_function;cellular_component;molecular_function;biological_process;biological_process	Binding to a metal ion.;Catalysis of the reaction: (+)-abscisate + H+ + NADPH + O2 = (+)-8'-hydroxyabscisate + H2O + NADP+.;The chemical reactions and pathways involving abscisic acid, 5-(1-hydroxy-2,6,6,trimethyl-4-oxocyclohex-2-en-1-y1)-3-methylpenta-2,4-dienoic acid.;Catalysis of an oxidation-reduction (redox) reaction in which hydrogen or electrons are transferred from NADH or NADPH and one o…	K09843	ko00906	Carotenoid biosynthesis
Solyc11g005710.2	Solyc11g005710.2	23.82592632097547	22.704245450881803	21.763721252856413	6.756603558988548	8.526493873810773	6.76121619407273	5.30762256024829	1.37877136716753	2.203609e-07	4.848244e-06	A0A3Q7INN7	Uncharacterized protein	XP_010312469.1	uncharacterized WD repeat-containing protein C18H10.05	PF00400	WD domain, G-beta repeat	IPR001680;IPR015943;IPR020472;IPR036322;IPR040324	WD40 repeat;WD40/YVTN repeat-like-containing domain superfamily;G-protein beta WD-40 repeat;WD40-repeat-containing domain superfamily;WD repeat-containing protein WDR44/Dgr2	-	-	-	-	-	K20241	-	-
Solyc01g105360.3	Solyc01g105360.3	25.364182631755117	25.785994423624576	24.72319984459261	8.876020548624156	8.841784435382062	7.949104399604905	4.83282378785897	1.31188870664341	2.240114e-07	4.920133e-06	K4D3V7	UDP-glycosyltransferase 76E1	XP_019071658.1;XP_004249656.1	-;-	PF00201	UDP-glucoronosyl and UDP-glucosyl transferase	IPR002213;IPR035595	UDP-glucuronosyl/UDP-glucosyltransferase;UDP-glycosyltransferase family, conserved site	KOG1192	UDP-glucuronosyl and UDP-glucosyl transferase	GO:0047215;GO:0008194;GO:0080044;GO:0080043;GO:0005634;GO:0016757;GO:0010294;GO:0005737	molecular_function;molecular_function;molecular_function;molecular_function;cellular_component;molecular_function;molecular_function;cellular_component	Catalysis of the reaction: (indol-3-yl)acetate + UDP-D-glucose = 1-O-(indol-3-ylacetyl)-beta-D-glucose + UDP.;Catalysis of the transfer of a glycosyl group from a UDP-sugar to a small hydrophobic molecule.;Catalysis of the transfer of a glucosyl group from UDP-glucose to the 7-hydroxy group of a quercetin molecule.;Catalysis of the transfer of a glucosyl group from UDP-glucose to the 3-hydroxy gr…	-	-	-
Solyc01g006300.3	Solyc01g006300.3	18.880882657017803	15.508767822185655	13.394279555039889	3.003532610016893	3.1994386432025506	2.355165008299809	3.48389213368694	2.21847601419986	2.24978e-07	4.935772e-06	P15004	Suberization-associated anionic peroxidase 2	NP_001295320.1	suberization-associated anionic peroxidase 2 precursor	PF00141	Peroxidase	IPR000823;IPR002016;IPR010255;IPR019793;IPR019794;IPR033905	Plant peroxidase;Haem peroxidase;Haem peroxidase superfamily;Peroxidases heam-ligand binding site;Peroxidase, active site;Secretory peroxidase	ENOG502QU1K	-	GO:0042744;GO:0046872;GO:0004601;GO:0098869;GO:0006979;GO:0140825;GO:0005576;GO:0020037	biological_process;molecular_function;molecular_function;biological_process;biological_process;molecular_function;cellular_component;molecular_function	The chemical reactions and pathways resulting in the breakdown of hydrogen peroxide (H2O2).;Binding to a metal ion.;Catalysis of the reaction: a donor + a peroxide = an oxidized donor + 2 H2O.;Any process carried out at the cellular level that reduces or removes the toxicity superoxide radicals or hydrogen peroxide.;Any process that results in a change in state or activity of a cell or an organis…	K00430	ko01100;ko01110;ko00940	Metabolic pathways;Biosynthesis of secondary metabolites;Phenylpropanoid biosynthesis
Solyc10g075170.3	Solyc10g075170.3	5.175267968656193	4.810867882983981	5.430775320852464	0.4563297338812079	0.3358467185703772	0.6180572031047938	1.7116613262132	3.21898774283581	2.295729e-07	4.99701e-06	A0A3Q7IIM2	Aminotransferase class I/classII domain-containing protein	-	-	PF00155	Aminotransferase class I and II	IPR000796;IPR004839;IPR015421;IPR015422;IPR015424	Aspartate/other aminotransferase;Aminotransferase, class I/classII;Pyridoxal phosphate-dependent transferase, major domain;Pyridoxal phosphate-dependent transferase, small domain;Pyridoxal phosphate-dependent transferase	-	-	GO:0009058;GO:0004069;GO:0008483;GO:0006520;GO:0030170	biological_process;molecular_function;molecular_function;biological_process;molecular_function	The chemical reactions and pathways resulting in the formation of substances; typically the energy-requiring part of metabolism in which simpler substances are transformed into more complex ones.;Catalysis of the reaction: L-aspartate + 2-oxoglutarate = oxaloacetate + L-glutamate.;Catalysis of the transfer of an amino group to an acceptor, usually a 2-oxo acid.;The chemical reactions and pathways…	-	-	-
Solyc09g011720.3	Solyc09g011720.3	13.807603646827603	12.150000376812736	12.272190073494276	4.771086584098503	5.195915014582668	4.847867220286029	4.71152389822293	1.11315017098241	2.312023e-07	5.026836e-06	A0A3Q7IUN4	DUF3527 domain-containing protein	XP_004246372.1	uncharacterized protein LOC101262946	PF12043	Domain of unknown function (DUF3527)	IPR021916	Protein of unknown function DUF3527	-	-	-	-	-	-	-	-
Solyc04g014810.3	Solyc04g014810.3	100.9156739121856	98.78801818941604	98.58851903998617	36.50748394808653	37.47280551537889	33.4676236574324	7.14884463942512	1.22107211023622	2.329699e-07	5.049926e-06	A0A3Q7G091	Uncharacterized protein	XP_004236666.1	U-box domain-containing protein 4-like	PF00514	Armadillo/beta-catenin-like repeat	IPR000225;IPR011989;IPR016024	Armadillo;Armadillo-like helical;Armadillo-type fold	-	-	GO:0005634;GO:0005737	cellular_component;cellular_component	A membrane-bounded organelle of eukaryotic cells in which chromosomes are housed and replicated. In most cells, the nucleus contains all of the cell's chromosomes except the organellar chromosomes, and is the site of RNA synthesis and processing. In some species, or in specialized cell types, RNA metabolism or DNA replication may be absent.;The contents of a cell excluding the plasma membrane and…	-	-	-
Solyc01g094830.4	Solyc01g094830.4	12.40614924924996	11.660837777521358	12.346092623788092	4.002350061929105	4.697077222241398	4.532611202321562	5.03605643190415	1.2085376596216	2.330455e-07	5.049926e-06	Q8GUQ5	Brassinosteroid LRR receptor kinase	NP_001296180.1	brassinosteroid LRR receptor kinase precursor	PF20141;PF08263;PF00560;PF13855;PF00069	Brassinosteroid receptor island domain;Leucine rich repeat N-terminal domain;Leucine Rich Repeat;Leucine rich repeat;Protein kinase domain	IPR000719;IPR001611;IPR003591;IPR008271;IPR011009;IPR013210;IPR017441;IPR032675;IPR045381	Protein kinase domain;Leucine-rich repeat;Leucine-rich repeat, typical subtype;Serine/threonine-protein kinase, active site;Protein kinase-like domain superfamily;Leucine-rich repeat-containing N-terminal, plant-type;Protein kinase, ATP binding site;Leucine-rich repeat domain superfamily;Brassinosteroid receptor BRI1, island domain	ENOG502QRF2	-	GO:0005886;GO:0050832;GO:0004672;GO:0038023;GO:0009755;GO:0106310;GO:0009742;GO:0001578;GO:0005524;GO:0006952;GO:0009729;GO:0004674;GO:0005496;GO:0009647	cellular_component;biological_process;molecular_function;molecular_function;biological_process;molecular_function;biological_process;biological_process;molecular_function;biological_process;biological_process;molecular_function;molecular_function;biological_process	The membrane surrounding a cell that separates the cell from its external environment. It consists of a phospholipid bilayer and associated proteins.;Reactions triggered in response to the presence of a fungus that act to protect the cell or organism.;Catalysis of the phosphorylation of an amino acid residue in a protein, usually according to the reaction: a protein + ATP = a phosphoprotein + ADP…	K13415	ko04075	Plant hormone signal transduction
Solyc06g059850.2	Solyc06g059850.2	5.808318009504324	5.020563222288007	5.9134558210595225	0.8620065949743287	0.793017813692138	1.036772925904773	2.12202335619534	2.39263771207393	2.353085e-07	5.081929e-06	A0A3Q7GX16	Dehydrogenase E1 component domain-containing protein	XP_004242055.2	2-oxoisovalerate dehydrogenase subunit alpha 1, mitochondrial	PF00676	Dehydrogenase E1 component	IPR001017;IPR029061	Dehydrogenase, E1 component;Thiamin diphosphate-binding fold	-	-	GO:0045252;GO:0016624;GO:0016491;GO:0009083	cellular_component;molecular_function;molecular_function;biological_process	A multi-enzyme complex that catalyzes the oxidative decarboxylation of alpha-ketoglutarate (also known as 2-oxoglutarate) to form succinyl-CoA. The complex comprises multiple copies of three enzymes referred to as E1, E2 and E3: oxoglutarate dehydrogenase (lipoamide) (E1), dihydrolipoamide S-succinyltransferase (E2) and dihydrolipoamide dehydrogenase (E3). Additional proteins may also be present.…	K00166	ko01100;ko00640;ko00280;ko01130;ko01110	Metabolic pathways;Propanoate metabolism;Valine, leucine and isoleucine degradation;Biosynthesis of antibiotics;Biosynthesis of secondary metabolites
Solyc02g068170.1	Solyc02g068170.1	9.809250425221402	5.902641329339806	7.972758298017945	0.2948630343587337	0.2893486154549358	0.2745635853612988	1.03944892338625	4.49069379576971	2.356315e-07	5.083244e-06	A0A3Q7FM45	DUF4005 domain-containing protein	-	-	-	-	-	-	-	-	-	-	-	-	-	-
Solyc04g063370.3	Solyc04g063370.3	3.473398775408268	2.8839213061970685	3.8657610577402486	0.3244950691130711	0.2587215173610648	0.3776945531741095	1.74327375210725	3.17520814336157	2.407103e-07	5.156508e-06	Q41328	Pto-interacting protein 1	NP_001233803.1;XP_010314665.1	pto-interacting protein 1;pto-interacting protein 1 isoform X1	PF07714	Protein tyrosine and serine/threonine kinase	IPR000719;IPR001245;IPR008271;IPR011009;IPR017441	Protein kinase domain;Serine-threonine/tyrosine-protein kinase, catalytic domain;Serine/threonine-protein kinase, active site;Protein kinase-like domain superfamily;Protein kinase, ATP binding site	KOG1187	Serine/threonine protein kinase	GO:0004672;GO:0005515;GO:0106310;GO:0004674;GO:0009626;GO:0005524	molecular_function;molecular_function;molecular_function;molecular_function;biological_process;molecular_function	Catalysis of the phosphorylation of an amino acid residue in a protein, usually according to the reaction: a protein + ATP = a phosphoprotein + ADP.;Binding to a protein.;Catalysis of the reactions: ATP + protein serine = ADP + protein serine phosphate.;Catalysis of the reactions: ATP + protein serine = ADP + protein serine phosphate, and ATP + protein threonine = ADP + protein threonine phosphat…	K13436	ko04626	Plant-pathogen interaction
Solyc01g090240.3	Solyc01g090240.3	8.472506338334826	7.359991635909238	7.708282296230885	2.7471200411664456	2.805259040108862	2.7658356152975188	3.88757435613897	1.24709096182747	2.407129e-07	5.156508e-06	Q5I6E9	AvrPto-dependent Pto-interacting protein 3	NP_001234611.1	AvrPto-dependent Pto-interacting protein 3	PF00069	Protein kinase domain	IPR000719;IPR008271;IPR011009	Protein kinase domain;Serine/threonine-protein kinase, active site;Protein kinase-like domain superfamily	KOG0610	Putative serine/threonine protein kinase	GO:0005524;GO:0004672;GO:0016740;GO:0043069;GO:0005515	molecular_function;molecular_function;molecular_function;biological_process;molecular_function	Binding to ATP, adenosine 5'-triphosphate, a universally important coenzyme and enzyme regulator.;Catalysis of the phosphorylation of an amino acid residue in a protein, usually according to the reaction: a protein + ATP = a phosphoprotein + ADP.;Catalysis of the transfer of a group, e.g. a methyl group, glycosyl group, acyl group, phosphorus-containing, or other groups, from one compound (genera…	-	-	-
Solyc06g075340.4	Solyc06g075340.4	21.49359062163349	19.489038702132383	19.54295445854414	8.260299629366116	8.319129590180719	8.22742509995788	5.73058034762457	1.03254360117908	2.465522e-07	5.248774e-06	A0A3Q7H3D4	carbamoyl-phosphate synthase (glutamine-hydrolyzing)	-	-	PF02786;PF02787;PF02142	Carbamoyl-phosphate synthase L chain, ATP binding domain;Carbamoyl-phosphate synthetase large chain, oligomerisation domain;MGS-like domain	IPR005479;IPR005480;IPR005483;IPR006275;IPR011607;IPR011761;IPR013815;IPR016185;IPR033937;IPR036897;IPR036914	Carbamoyl-phosphate synthetase large subunit-like, ATP-binding domain;Carbamoyl-phosphate synthetase, large subunit oligomerisation domain;Carbamoyl-phosphate synthase large subunit, CPSase domain;Carbamoyl-phosphate synthase, large subunit;Methylglyoxal synthase-like domain;ATP-grasp fold;ATP-grasp fold, subdomain 1;Pre-ATP-grasp domain superfamily;Carbamoyl-phosphate synthase large chain, methy…	-	-	GO:0006541;GO:0004088;GO:0005524;GO:0016874;GO:0006526;GO:0005737;GO:0006221;GO:0044205;GO:0046872	biological_process;molecular_function;molecular_function;molecular_function;biological_process;cellular_component;biological_process;biological_process;molecular_function	The chemical reactions and pathways involving glutamine, 2-amino-4-carbamoylbutanoic acid.;Catalysis of the reaction: 2 ATP + L-glutamine + CO2 + H2O = 2 ADP + phosphate + glutamate + carbamoyl phosphate.;Binding to ATP, adenosine 5'-triphosphate, a universally important coenzyme and enzyme regulator.;Catalysis of the joining of two molecules, or two groups within a single molecule, using the ene…	-	-	-
Solyc08g076650.3	Solyc08g076650.3	17.931864830882166	17.84273710487226	19.54091369237685	5.854655014645238	5.395245545939027	5.683253520365099	5.10662655374485	1.45742830784632	2.499029e-07	5.304062e-06	A0A3Q7IMV6	Uncharacterized protein	XP_004245918.1;XP_010325563.1	alpha,alpha-trehalose-phosphate synthase;alpha,alpha-trehalose-phosphate synthase	PF00982;PF02358	Glycosyltransferase family 20;Trehalose-phosphatase	IPR001830;IPR003337;IPR006379;IPR023214;IPR036412	Glycosyl transferase, family 20;Trehalose-phosphatase;HAD-superfamily hydrolase, subfamily IIB;HAD superfamily;HAD-like superfamily	-	-	GO:0005991;GO:0003824;GO:0005992	biological_process;molecular_function;biological_process	The chemical reactions and pathways involving trehalose, a disaccharide that consists of two molecules of glucose and is isomeric with sucrose.;Catalysis of a biochemical reaction at physiological temperatures. In biologically catalyzed reactions, the reactants are known as substrates, and the catalysts are naturally occurring macromolecular substances known as enzymes. Enzymes possess specific b…	K16055	ko01100;ko00500	Metabolic pathways;Starch and sucrose metabolism
Solyc01g028803.1	Solyc01g028803.1	21.214328529653745	17.612395504203334	21.382669227086083	6.162969554181293	6.486171106707749	6.0256226149066014	4.34333616870124	1.43617190753926	2.502326e-07	5.304062e-06	K4CEE8	Beta-amyrin 28-monooxygenase	XP_004243906.1	beta-amyrin 28-monooxygenase-like	PF00067	Cytochrome P450	IPR001128;IPR002401;IPR017972;IPR036396	Cytochrome P450;Cytochrome P450, E-class, group I;Cytochrome P450, conserved site;Cytochrome P450 superfamily	KOG0157	Cytochrome P450 CYP4/CYP19/CYP26 subfamilies	GO:0046872;GO:0102373;GO:0016712;GO:0016705;GO:0020037;GO:0016125;GO:0005506;GO:0016020;GO:0004497;GO:0102374	molecular_function;molecular_function;molecular_function;molecular_function;molecular_function;biological_process;molecular_function;cellular_component;molecular_function;molecular_function	Binding to a metal ion.;Catalysis of the reaction: beta-amyrin + 3 O2 + 3 reduced [NADPH--hemoprotein reductase] = 4 H+ + 4 H2O + oleanolate + 3 oxidized [NADPH--hemoprotein reductase].;Catalysis of an oxidation-reduction (redox) reaction in which hydrogen or electrons are transferred from reduced flavin or flavoprotein and one other donor, and one atom of oxygen is incorporated into one donor.;C…	K20667	-	-
Solyc01g111740.3	Solyc01g111740.3	6.107285397452306	7.055865880459561	6.311734964175728	1.506713196431137	1.2727163847909604	1.30732744712713	3.44448232191401	2.00640633743633	2.502432e-07	5.304062e-06	A0A3Q7EW51	DUF632 domain-containing protein	XP_004231454.1	-	PF04783;PF04782	Protein of unknown function (DUF630);Protein of unknown function (DUF632)	IPR006867;IPR006868	Domain of unknown function DUF632;Domain of unknown function DUF630	-	-	-	-	-	-	-	-
Solyc10g079170.2	Solyc10g079170.2	1.7403113334085465	1.4338191429731402	1.5718380580195086	0.2215618750862026	0.2310069514276048	0.1719239548381586	1.25615299483184	2.65875356751147	2.554894e-07	5.389674e-06	Q8GUQ5	Brassinosteroid LRR receptor kinase	NP_001296180.1	brassinosteroid LRR receptor kinase precursor	PF20141;PF08263;PF00560;PF13855;PF00069	Brassinosteroid receptor island domain;Leucine rich repeat N-terminal domain;Leucine Rich Repeat;Leucine rich repeat;Protein kinase domain	IPR000719;IPR001611;IPR003591;IPR008271;IPR011009;IPR013210;IPR017441;IPR032675;IPR045381	Protein kinase domain;Leucine-rich repeat;Leucine-rich repeat, typical subtype;Serine/threonine-protein kinase, active site;Protein kinase-like domain superfamily;Leucine-rich repeat-containing N-terminal, plant-type;Protein kinase, ATP binding site;Leucine-rich repeat domain superfamily;Brassinosteroid receptor BRI1, island domain	ENOG502QRF2	-	GO:0005886;GO:0050832;GO:0004672;GO:0038023;GO:0009755;GO:0106310;GO:0009742;GO:0001578;GO:0005524;GO:0006952;GO:0009729;GO:0004674;GO:0005496;GO:0009647	cellular_component;biological_process;molecular_function;molecular_function;biological_process;molecular_function;biological_process;biological_process;molecular_function;biological_process;biological_process;molecular_function;molecular_function;biological_process	The membrane surrounding a cell that separates the cell from its external environment. It consists of a phospholipid bilayer and associated proteins.;Reactions triggered in response to the presence of a fungus that act to protect the cell or organism.;Catalysis of the phosphorylation of an amino acid residue in a protein, usually according to the reaction: a protein + ATP = a phosphoprotein + ADP…	K13415	ko04075	Plant hormone signal transduction
Solyc08g005150.3	Solyc08g005150.3	22.68238015151962	22.372471387364666	20.81794232296173	7.535137985907961	7.542103007894991	6.349834349438392	5.19580605892917	1.36729754057137	2.663559e-07	5.579294e-06	A0A3Q7HGP6	RBR-type E3 ubiquitin transferase	XP_004244398.1	E3 ubiquitin-protein ligase RNF14	PF01485;PF05773	IBR domain, a half RING-finger domain;RWD domain	IPR001841;IPR002867;IPR006575;IPR013083;IPR016135;IPR017907;IPR031127;IPR044066	Zinc finger, RING-type;IBR domain;RWD domain;Zinc finger, RING/FYVE/PHD-type;Ubiquitin-conjugating enzyme/RWD-like;Zinc finger, RING-type, conserved site;E3 ubiquitin ligase RBR family;TRIAD supradomain	-	-	GO:0016567;GO:0031624;GO:0000151;GO:0006511;GO:0000209;GO:0005737;GO:0004842;GO:0016740;GO:0046872;GO:0061630;GO:0008270	biological_process;molecular_function;cellular_component;biological_process;biological_process;cellular_component;molecular_function;molecular_function;molecular_function;molecular_function;molecular_function	The process in which one or more ubiquitin groups are added to a protein.;Binding to a ubiquitin conjugating enzyme, any of the E2 proteins.;A protein complex that includes a ubiquitin-protein ligase and enables ubiquitin protein ligase activity. The complex also contains other proteins that may confer substrate specificity on the complex.;The chemical reactions and pathways resulting in the brea…	K11971	-	-
Solyc01g005760.3	Solyc01g005760.3	12.035717488969004	9.789861576096111	10.040838676342725	3.099398359033847	3.229388383876994	2.561752037957295	4.20816	1.5848514673356	2.66393e-07	5.579294e-06	O49879	Receptor-like protein Cf-9 homolog	XP_019069253.1;XP_004228623.1	-;-	PF08263;PF00560;PF13516;PF13855	Leucine rich repeat N-terminal domain;Leucine Rich Repeat;Leucine Rich repeat;Leucine rich repeat	IPR001611;IPR003591;IPR013210;IPR032675;IPR046956	Leucine-rich repeat;Leucine-rich repeat, typical subtype;Leucine-rich repeat-containing N-terminal, plant-type;Leucine-rich repeat domain superfamily;Receptor-like protein 23-like	KOG0619	FOG: Leucine rich repeat	GO:0005886;GO:0050832	cellular_component;biological_process	The membrane surrounding a cell that separates the cell from its external environment. It consists of a phospholipid bilayer and associated proteins.;Reactions triggered in response to the presence of a fungus that act to protect the cell or organism.	-	-	-
Solyc03g005450.3	Solyc03g005450.3	90.59092540272236	85.08390330838337	81.05700095727346	29.504240937130195	30.89537925808543	25.48613600817476	7.04070347168711	1.32658859519186	2.674799e-07	5.583967e-06	A0A3Q7FEW0	Uncharacterized protein	XP_004234035.1	cellulose synthase-like protein G2	PF03552	Cellulose synthase	IPR005150;IPR029044	Cellulose synthase;Nucleotide-diphospho-sugar transferases	-	-	GO:0016757;GO:0009833;GO:0016760;GO:0016020;GO:0030244;GO:0005886;GO:0051753	molecular_function;biological_process;molecular_function;cellular_component;biological_process;cellular_component;molecular_function	Catalysis of the transfer of a glycosyl group from one compound (donor) to another (acceptor).;A cellular process that results in the biosynthesis of constituent macromolecules, assembly, and arrangement of constituent parts of cellulose and pectin-containing cell walls that form adjacent to the middle lamella following cell division and during cell expansion. An example of this is found in Arabi…	-	-	-
Solyc07g005010.4	Solyc07g005010.4	10.281761958862209	9.099243541208008	10.335603576794783	3.023639361099647	3.1680653874096114	3.4257330104562054	4.38982187327678	1.37552	2.723551e-07	5.673528e-06	Q8GUQ5	Brassinosteroid LRR receptor kinase	NP_001296180.1	brassinosteroid LRR receptor kinase precursor	PF20141;PF08263;PF00560;PF13855;PF00069	Brassinosteroid receptor island domain;Leucine rich repeat N-terminal domain;Leucine Rich Repeat;Leucine rich repeat;Protein kinase domain	IPR000719;IPR001611;IPR003591;IPR008271;IPR011009;IPR013210;IPR017441;IPR032675;IPR045381	Protein kinase domain;Leucine-rich repeat;Leucine-rich repeat, typical subtype;Serine/threonine-protein kinase, active site;Protein kinase-like domain superfamily;Leucine-rich repeat-containing N-terminal, plant-type;Protein kinase, ATP binding site;Leucine-rich repeat domain superfamily;Brassinosteroid receptor BRI1, island domain	ENOG502QRF2	-	GO:0005886;GO:0050832;GO:0004672;GO:0038023;GO:0009755;GO:0106310;GO:0009742;GO:0001578;GO:0005524;GO:0006952;GO:0009729;GO:0004674;GO:0005496;GO:0009647	cellular_component;biological_process;molecular_function;molecular_function;biological_process;molecular_function;biological_process;biological_process;molecular_function;biological_process;biological_process;molecular_function;molecular_function;biological_process	The membrane surrounding a cell that separates the cell from its external environment. It consists of a phospholipid bilayer and associated proteins.;Reactions triggered in response to the presence of a fungus that act to protect the cell or organism.;Catalysis of the phosphorylation of an amino acid residue in a protein, usually according to the reaction: a protein + ATP = a phosphoprotein + ADP…	K13415	ko04075	Plant hormone signal transduction
Solyc02g075620.4	Solyc02g075620.4	12.875613505948206	11.644296870664958	12.518564722670318	3.1422347876415184	3.590619531583731	2.6949188185336546	3.16292673469467	1.71718560668077	2.72965e-07	5.680132e-06	Q43143	Pectinesterase/pectinesterase inhibitor U1	NP_001233857.2	pectinesterase/pectinesterase inhibitor U1 precursor	PF01095;PF04043	Pectinesterase;Plant invertase/pectin methylesterase inhibitor	IPR000070;IPR006501;IPR011050;IPR012334;IPR018040;IPR033131;IPR035513	Pectinesterase, catalytic;Pectinesterase inhibitor domain;Pectin lyase fold/virulence factor;Pectin lyase fold;Pectinesterase, Tyr active site;Pectinesterase, Asp active site;Invertase/pectin methylesterase inhibitor domain superfamily	ENOG502QVK0	-	GO:0004857;GO:0016787;GO:0046910;GO:0005576;GO:0045490;GO:0042545;GO:0030599;GO:0071555	molecular_function;molecular_function;molecular_function;cellular_component;biological_process;biological_process;molecular_function;biological_process	Binds to and stops, prevents or reduces the activity of an enzyme.;Catalysis of the hydrolysis of various bonds, e.g. C-O, C-N, C-C, phosphoric anhydride bonds, etc.;Binds to and stops, prevents or reduces the activity of pectinesterase.;The space external to the outermost structure of a cell. For cells without external protective or external encapsulating structures this refers to space outside …	K01051	ko00040;ko02020;ko01100	Pentose and glucuronate interconversions;Two-component system;Metabolic pathways
Solyc12g044200.3	Solyc12g044200.3	8.176850027396057	7.276713538311691	7.440111072981038	2.268044760552388	2.8329744711842686	2.52833609743992	3.92716582808043	1.3295330076989	2.760773e-07	5.720345e-06	A0A3Q7JW57	AAA+ ATPase domain-containing protein	XP_004252495.2	disease resistance protein RPS2-like	PF00931	NB-ARC domain	IPR002182;IPR003593;IPR027417;IPR032675;IPR042197	NB-ARC;AAA+ ATPase domain;P-loop containing nucleoside triphosphate hydrolase;Leucine-rich repeat domain superfamily;Apoptotic protease-activating factors, helical domain	-	-	GO:0016887;GO:0098542;GO:0043531	molecular_function;biological_process;molecular_function	Catalysis of the reaction: ATP + H2O = ADP + H+ phosphate. ATP hydrolysis is used in some reactions as an energy source, for example to catalyze a reaction or drive transport against a concentration gradient.;Reactions triggered in response to the presence of another organism that act to protect the cell or organism from damage caused by that organism.;Binding to ADP, adenosine 5'-diphosphate.	-	-	-
Solyc05g013220.2	Solyc05g013220.2	8.5700460287173	8.456847888966672	8.337039723042206	2.661024505365844	2.6177225262566326	2.355165008299809	3.32198692876768	1.4803578200422	2.791239e-07	5.76228e-06	A0A3Q7GF03	3-ketoacyl-CoA synthase	XP_004239114.1	3-ketoacyl-CoA synthase 20	PF08541;PF08392	3-Oxoacyl-[acyl-carrier-protein (ACP)] synthase III C terminal;FAE1/Type III polyketide synthase-like protein	IPR012392;IPR013601;IPR013747;IPR016039	Very-long-chain 3-ketoacyl-CoA synthase;FAE1/Type III polyketide synthase-like protein;Beta-ketoacyl-[acyl-carrier-protein] synthase III, C-terminal;Thiolase-like	-	-	GO:0016746;GO:0009922;GO:0016020;GO:0016747;GO:0006633	molecular_function;molecular_function;cellular_component;molecular_function;biological_process	Catalysis of the transfer of an acyl group from one compound (donor) to another (acceptor).;Catalysis of the reaction: a very-long-chain acyl-CoA + H+ + malonyl-CoA = a very-long-chain 3-oxoacyl-CoA + CO2 + CoA. This reaction is the first (condensation) step of the four-step fatty acid elongation cycle in the endoplasmic reticulum that extends fatty acids of C-16 or longer with an additional 2-C …	K15397	ko01100;ko00062;ko01110	Metabolic pathways;Fatty acid elongation;Biosynthesis of secondary metabolites
Solyc08g007070.2	Solyc08g007070.2	9.654318841418988	11.394461355603578	10.516310145696	1.3233386252054629	1.640324258477203	1.7510710132872649	2.06588778678442	2.48443985921473	2.792896e-07	5.76228e-06	K4CIJ4	Uncharacterized protein	-	-	-	-	-	-	-	-	-	-	-	-	-	-
Solyc03g123580.4	Solyc03g123580.4	8.838414141356123	8.82014172162403	6.90140280563566	0.5977799907485103	0.7699131975724278	0.3478916445776699	1.50219088880679	3.53647675387645	2.81677e-07	5.790913e-06	A0A3Q7FXV7	Uncharacterized protein	XP_004235531.1	uncharacterized protein LOC101247199	-	-	-	-	-	-	-	-	-	-	-	-
Solyc06g035570.1	Solyc06g035570.1	60.67203040785088	64.58303771722484	68.0705635568668	8.953113952347007	8.126750431345673	11.671448410449392	2.56763491863631	2.50819107850392	2.838401e-07	5.819022e-06	Q40168	Floral homeotic protein AGAMOUS	NP_001266181.1	floral homeotic protein AGAMOUS isoform 2	PF01486;PF00319	K-box region;SRF-type transcription factor (DNA-binding and dimerisation domain)	IPR002100;IPR002487;IPR033896;IPR036879	Transcription factor, MADS-box;Transcription factor, K-box;MADS MEF2-like;Transcription factor, MADS-box superfamily	KOG0014	MADS box transcription factor	GO:0000978;GO:0045944;GO:0046983;GO:0003677;GO:0003700;GO:0000981;GO:0005634;GO:0006357;GO:0000977	molecular_function;biological_process;molecular_function;molecular_function;molecular_function;molecular_function;cellular_component;biological_process;molecular_function	Binding to a specific upstream regulatory DNA sequence (transcription factor recognition sequence or binding site) located in cis relative to the transcription start site (i.e., on the same strand of DNA) of a gene transcribed by RNA polymerase II.;Any process that activates or increases the frequency, rate or extent of transcription from an RNA polymerase II promoter.;The formation of a protein …	K09264	-	-
Solyc03g007180.1	Solyc03g007180.1	9.550227008643194	8.475287252643332	8.352517870676168	2.8659438842168985	3.2757439980488514	2.8303777009467224	3.69886161598359	1.29958998334221	2.847449e-07	5.831408e-06	A0A3Q7FFY1	DUF659 domain-containing protein	XP_004234166.1	uncharacterized protein LOC101248359	-	-	IPR012337	Ribonuclease H-like superfamily	-	-	-	-	-	-	-	-
Solyc03g062900.3	Solyc03g062900.3	12.84406607734324	11.324532117646244	12.728571834224216	3.5191031447657	4.061963635315832	3.1589634515244964	3.90093438214083	1.52602483513694	2.886853e-07	5.899645e-06	A0A3Q7FL27	Uncharacterized protein	XP_010317900.1;XP_019068418.1;XP_019068419.1	uncharacterized protein LOC101264799 isoform X1;uncharacterized protein LOC101264799 isoform X1;-	-	-	IPR038745	AT4G37440-like	-	-	-	-	-	-	-	-
Solyc03g114730.3	Solyc03g114730.3	33.92459471910782	27.82522284910116	28.953842628245	7.196665702754857	9.845365243372507	9.050590153219868	5.75876265126849	1.54281174452412	2.953927e-07	5.986256e-06	A0A3Q7FTB5	O-fucosyltransferase family protein	XP_004236078.1	O-fucosyltransferase 34-like	PF10250	GDP-fucose protein O-fucosyltransferase	IPR019378;IPR024709	GDP-fucose protein O-fucosyltransferase;Putative O-fucosyltransferase, plant	-	-	GO:0016740;GO:0005737;GO:0016020;GO:0006004	molecular_function;cellular_component;cellular_component;biological_process	Catalysis of the transfer of a group, e.g. a methyl group, glycosyl group, acyl group, phosphorus-containing, or other groups, from one compound (generally regarded as the donor) to another compound (generally regarded as the acceptor). Transferase is the systematic name for any enzyme of EC class 2.;The contents of a cell excluding the plasma membrane and nucleus, but including other subcellular…	K23280	-	-
Solyc10g078740.2	Solyc10g078740.2	27.129688989636207	23.29100319989474	23.60458853522352	8.507802001837598	9.676893289907152	8.042125540857517	4.62615031547169	1.24167823670967	3.053504e-07	6.143117e-06	A0A3Q7IJL4	Enoyl-[acyl-carrier-protein] reductase (NADH)	XP_004249169.1	enoyl-	PF13561	Enoyl-(Acyl carrier protein) reductase	IPR002347;IPR014358;IPR036291	Short-chain dehydrogenase/reductase SDR;Enoyl-[acyl-carrier-protein] reductase (NADH);NAD(P)-binding domain superfamily	-	-	GO:0006633;GO:0004318;GO:0016491	biological_process;molecular_function;molecular_function	The chemical reactions and pathways resulting in the formation of a fatty acid, any of the aliphatic monocarboxylic acids that can be liberated by hydrolysis from naturally occurring fats and oils. Fatty acids are predominantly straight-chain acids of 4 to 24 carbon atoms, which may be saturated or unsaturated; branched fatty acids and hydroxy fatty acids also occur, and very long chain acids of …	K00208	ko01100;ko00061;ko01130;ko01212;ko00333;ko00780	Metabolic pathways;Fatty acid biosynthesis;Biosynthesis of antibiotics;Fatty acid metabolism;Prodigiosin biosynthesis;Biotin metabolism
Solyc12g008470.2	Solyc12g008470.2	15.268791705630248	12.958390589353996	13.2045777008767	2.699319239785684	3.5518503838174618	3.046652408992485	2.31831160721579	1.89090098270374	3.05963e-07	6.14766e-06	A0A3Q7J3C9	Cytochrome b5 heme-binding domain-containing protein	XP_004251636.1;XP_004251635.1;XP_010313740.1	cytochrome B5-like protein;cytochrome B5-like protein;cytochrome B5-like protein	PF00173	Cytochrome b5-like Heme/Steroid binding domain	IPR001199;IPR018506;IPR036400	Cytochrome b5-like heme/steroid binding domain;Cytochrome b5, heme-binding site;Cytochrome b5-like heme/steroid binding domain superfamily	-	-	GO:0020037;GO:0016020;GO:0046872;GO:0043231	molecular_function;cellular_component;molecular_function;cellular_component	Binding to a heme, a compound composed of iron complexed in a porphyrin (tetrapyrrole) ring.;A lipid bilayer along with all the proteins and protein complexes embedded in it and attached to it.;Binding to a metal ion.;Organized structure of distinctive morphology and function, bounded by a single or double lipid bilayer membrane and occurring within the cell. Includes the nucleus, mitochondria, p…	K23490	-	-
Solyc12g049510.3	Solyc12g049510.3	5.855337065192019	5.731572853465364	6.271310607260413	1.6724185593836431	2.045648343514099	1.7656520257376802	3.97843048578519	1.45103504838431	3.067008e-07	6.14766e-06	A0A3Q7JBB5	COP1-interacting protein 7	-	-	-	-	-	-	-	-	-	-	-	-	-	-
Solyc08g078300.4	Solyc08g078300.4	4.192586692202563	4.859724421679893	3.863708306913076	0.5084572260467124	0.4317821376377765	0.5462921217871751	1.57222101172043	2.86987043750729	3.081077e-07	6.164959e-06	A0A3Q7HUM3	Homeobox domain-containing protein	-	-	PF02183;PF04618;PF00046	Homeobox associated leucine zipper;HD-ZIP protein N terminus;Homeodomain	IPR000047;IPR001356;IPR003106;IPR006712;IPR009057;IPR017970	Helix-turn-helix motif;Homeobox domain;Leucine zipper, homeobox-associated;HD-ZIP protein, N-terminal;Homeobox-like domain superfamily;Homeobox, conserved site	-	-	GO:0000981;GO:0006357;GO:0006355;GO:0005634;GO:0003677;GO:0043565	molecular_function;biological_process;biological_process;cellular_component;molecular_function;molecular_function	A DNA-binding transcription factor activity that modulates the transcription of specific gene sets transcribed by RNA polymerase II.;Any process that modulates the frequency, rate or extent of transcription mediated by RNA polymerase II.;Any process that modulates the frequency, rate or extent of cellular DNA-templated transcription.;A membrane-bounded organelle of eukaryotic cells in which chrom…	-	-	-
Solyc12g043020.2	Solyc12g043020.2	39.55736022286702	36.759881698232185	41.29408895932959	12.000730224867777	12.672319627328354	14.089657683759151	5.82927452913041	1.34938883398363	3.098191e-07	6.188087e-06	A0A3Q7J9S1	dihydroxy-acid dehydratase	NP_001311413.1	dihydroxy-acid dehydratase-like	PF00920	Dehydratase family	IPR000581;IPR004404;IPR020558;IPR037237;IPR042096	Dihydroxy-acid/6-phosphogluconate dehydratase;Dihydroxy-acid dehydratase;Dihydroxy-acid/6-phosphogluconate dehydratase, conserved site;IlvD/EDD, N-terminal domain;Dihydroxy-acid dehydratase, C-terminal	-	-	GO:0016829;GO:0016836;GO:0009097;GO:0009099;GO:0009082;GO:0046872;GO:0051537;GO:0004160;GO:0008652	molecular_function;molecular_function;biological_process;biological_process;biological_process;molecular_function;molecular_function;molecular_function;biological_process	Catalysis of the cleavage of C-C, C-O, C-N and other bonds by other means than by hydrolysis or oxidation, or conversely adding a group to a double bond. They differ from other enzymes in that two substrates are involved in one reaction direction, but only one in the other direction. When acting on the single substrate, a molecule is eliminated and this generates either a new double bond or a new…	K01687	ko01130;ko01230;ko01210;ko00290;ko00770;ko01110;ko01100	Biosynthesis of antibiotics;Biosynthesis of amino acids;"2-Oxocarboxylic acid metabolism";Valine, leucine and isoleucine biosynthesis;Pantothenate and CoA biosynthesis;Biosynthesis of secondary metabolites;Metabolic pathways
Solyc10g079470.3	Solyc10g079470.3	24.4768931338532	22.24912032320792	21.54083154072782	7.7107481850425375	8.929394896574443	8.938680190571093	5.06783289250655	1.16208360768198	3.115662e-07	6.21658e-06	A0A3Q7IKY7	FAD-binding PCMH-type domain-containing protein	NP_001234603.2	L-galactonolactone dehydrogenase	PF04030;PF01565	D-arabinono-1,4-lactone oxidase;FAD binding domain	IPR006094;IPR007173;IPR010029;IPR010031;IPR016166;IPR016167;IPR016169;IPR036318	FAD linked oxidase, N-terminal;D-arabinono-1,4-lactone oxidase, C-terminal domain;Galactonolactone dehydrogenase;L-gulonolactone/D-arabinono-1,4-lactone oxidase-like;FAD-binding domain, PCMH-type;FAD-binding, type PCMH, subdomain 1;FAD-binding, type PCMH, subdomain 2;FAD-binding, type PCMH-like superfamily	-	-	GO:0019853;GO:0071949;GO:0009820;GO:0016020;GO:0016633;GO:0016491;GO:0003885	biological_process;molecular_function;biological_process;cellular_component;molecular_function;molecular_function;molecular_function	The chemical reactions and pathways resulting in the formation of L-ascorbic acid; L-ascorbic acid ionizes to give L-ascorbate, (2R)-2-[(1S)-1,2-dihydroxyethyl]-4-hydroxy-5-oxo-2,5-dihydrofuran-3-olate, which is required as a cofactor in the oxidation of prolyl residues to hydroxyprolyl, and other reactions.;Binding to the oxidized form, FAD, of flavin-adenine dinucleotide, the coenzyme or the pr…	K00225	ko01110;ko00053;ko01100	Biosynthesis of secondary metabolites;Ascorbate and aldarate metabolism;Metabolic pathways
Solyc03g095370.3	Solyc03g095370.3	60.206973570998265	50.62585441711455	57.82967921096428	18.23352334398972	19.744460268405174	19.573663902632028	3.95614762542742	1.29790829031024	3.250409e-07	6.425936e-06	A0A3Q7FLR6	Uncharacterized protein	-	-	-	-	-	-	-	-	GO:0016020	cellular_component	A lipid bilayer along with all the proteins and protein complexes embedded in it and attached to it.	-	-	-
Solyc11g072480.2	Solyc11g072480.2	34.93673788888096	25.082511779924936	29.351767100758984	5.694350200971413	7.729104899800389	7.171184449886813	4.20982140190007	1.85775375139362	3.428323e-07	6.709273e-06	A0A3Q7J1F2	Tetraspanin-3	XP_004251266.1	tetraspanin-3	PF00335	Tetraspanin family	IPR018499;IPR044991	Tetraspanin/Peripherin;Tetraspani, plant	-	-	GO:0005886;GO:0009734;GO:0009506;GO:0016020	cellular_component;biological_process;cellular_component;cellular_component	The membrane surrounding a cell that separates the cell from its external environment. It consists of a phospholipid bilayer and associated proteins.;The series of molecular signals generated by the binding of the plant hormone auxin to a receptor, and ending with modulation of a downstream cellular process, e.g. transcription.;A fine cytoplasmic channel, found in all higher plants, that connects…	-	-	-
Solyc09g007710.3	Solyc09g007710.3	1.6857707930678776	1.386941429024122	1.6802793638699698	0.2678975806984661	0.2347209461511056	0.2850908938155662	1.81610271518419	2.34930370937224	3.442685e-07	6.730587e-06	A0A3Q7HY85	TIR domain-containing protein	-	-	PF00560;PF00931;PF01582	Leucine Rich Repeat;NB-ARC domain;TIR domain	IPR000157;IPR001611;IPR002182;IPR003591;IPR027417;IPR032675;IPR035897;IPR042197;IPR044974	Toll/interleukin-1 receptor homology (TIR) domain;Leucine-rich repeat;NB-ARC;Leucine-rich repeat, typical subtype;P-loop containing nucleoside triphosphate hydrolase;Leucine-rich repeat domain superfamily;Toll/interleukin-1 receptor homology (TIR) domain superfamily;Apoptotic protease-activating factors, helical domain;Disease resistance protein, plants	-	-	GO:0043531;GO:0005524;GO:0007165;GO:0006952;GO:0098542;GO:0005886	molecular_function;molecular_function;biological_process;biological_process;biological_process;cellular_component	Binding to ADP, adenosine 5'-diphosphate.;Binding to ATP, adenosine 5'-triphosphate, a universally important coenzyme and enzyme regulator.;The cellular process in which a signal is conveyed to trigger a change in the activity or state of a cell. Signal transduction begins with reception of a signal (e.g. a ligand binding to a receptor or receptor activation by a stimulus such as light), or for s…	-	-	-
Solyc04g007160.1	Solyc04g007160.1	33.98757258958314	31.158483109187426	34.03084316578624	10.577938336291464	12.438239649176714	11.887586343976231	4.13572398152735	1.2539312717474	3.497418e-07	6.816977e-06	A0A3Q7FVH3	Alpha-glucosidase	-	-	PF01055;PF21365	Glycosyl hydrolases family 31 TIM-barrel domain;Glycosyl hydrolase family 31 C-terminal domain	IPR000322;IPR011013;IPR013780;IPR017853;IPR030458;IPR030459;IPR048395	Glycoside hydrolase family 31, TIM barrel domain;Galactose mutarotase-like domain superfamily;Glycosyl hydrolase, all-beta;Glycoside hydrolase superfamily;Glycosyl hydrolases family 31, active site;Glycosyl hydrolases family 31, conserved site;Glycosyl hydrolase family 31, C-terminal domain	-	-	GO:0030246;GO:0016798;GO:0004553;GO:0005975	molecular_function;molecular_function;molecular_function;biological_process	Binding to a carbohydrate, which includes monosaccharides, oligosaccharides and polysaccharides as well as substances derived from monosaccharides by reduction of the carbonyl group (alditols), by oxidation of one or more hydroxy groups to afford the corresponding aldehydes, ketones, or carboxylic acids, or by replacement of one or more hydroxy group(s) by a hydrogen atom. Cyclitols are generally…	-	-	-
Solyc03g043770.4	Solyc03g043770.4	1.0487155340311496	1.0890900120948537	1.2004463682154145	0.0276796665193415	0.0407430175219007	0.0257740971081151	0.100937634300687	4.75098791053429	3.546056e-07	6.891004e-06	Q8GUQ5	Brassinosteroid LRR receptor kinase	NP_001296180.1	brassinosteroid LRR receptor kinase precursor	PF20141;PF08263;PF00560;PF13855;PF00069	Brassinosteroid receptor island domain;Leucine rich repeat N-terminal domain;Leucine Rich Repeat;Leucine rich repeat;Protein kinase domain	IPR000719;IPR001611;IPR003591;IPR008271;IPR011009;IPR013210;IPR017441;IPR032675;IPR045381	Protein kinase domain;Leucine-rich repeat;Leucine-rich repeat, typical subtype;Serine/threonine-protein kinase, active site;Protein kinase-like domain superfamily;Leucine-rich repeat-containing N-terminal, plant-type;Protein kinase, ATP binding site;Leucine-rich repeat domain superfamily;Brassinosteroid receptor BRI1, island domain	ENOG502QRF2	-	GO:0005886;GO:0050832;GO:0004672;GO:0038023;GO:0009755;GO:0106310;GO:0009742;GO:0001578;GO:0005524;GO:0006952;GO:0009729;GO:0004674;GO:0005496;GO:0009647	cellular_component;biological_process;molecular_function;molecular_function;biological_process;molecular_function;biological_process;biological_process;molecular_function;biological_process;biological_process;molecular_function;molecular_function;biological_process	The membrane surrounding a cell that separates the cell from its external environment. It consists of a phospholipid bilayer and associated proteins.;Reactions triggered in response to the presence of a fungus that act to protect the cell or organism.;Catalysis of the phosphorylation of an amino acid residue in a protein, usually according to the reaction: a protein + ATP = a phosphoprotein + ADP…	K13415	ko04075	Plant hormone signal transduction
Solyc02g092530.4	Solyc02g092530.4	9.072118021977705	7.191964508761507	8.180740862986253	2.037203824854372	2.5702775947326746	2.420876246341664	3.68740868694671	1.54112512298235	3.566182e-07	6.916253e-06	A0A3Q7FBF2	Formamidase	-	-	PF03069	Acetamidase/Formamidase family	IPR004304	Acetamidase/Formamidase	-	-	GO:0016811	molecular_function	Catalysis of the hydrolysis of any non-peptide carbon-nitrogen bond in a linear amide.	-	-	-
Solyc12g044954.1	Solyc12g044954.1	11.271893385717265	9.612484500155327	11.14776929409885	2.3434325110170016	2.1448252997656367	2.7975667330894995	3.37529904089038	1.88885818136921	3.664789e-07	7.067441e-06	A0A3Q7G3P6	Cytochrome P450	XP_004237505.1	cytochrome P450 CYP736A12	PF00067	Cytochrome P450	IPR001128;IPR002401;IPR017972;IPR036396	Cytochrome P450;Cytochrome P450, E-class, group I;Cytochrome P450, conserved site;Cytochrome P450 superfamily	-	-	GO:0020037;GO:0005506;GO:0004497;GO:0046872;GO:0016705	molecular_function;molecular_function;molecular_function;molecular_function;molecular_function	Binding to a heme, a compound composed of iron complexed in a porphyrin (tetrapyrrole) ring.;Binding to an iron (Fe) ion.;Catalysis of the incorporation of one atom from molecular oxygen into a compound and the reduction of the other atom of oxygen to water.;Binding to a metal ion.;Catalysis of an oxidation-reduction (redox) reaction in which hydrogen or electrons are transferred from each of two…	K20562	-	-
Solyc01g111040.4	Solyc01g111040.4	77.33580455299638	70.23424992198403	73.8555052198519	30.425412668569063	30.126306855549643	30.66227972236705	6.03501606917387	1.02564656042907	3.666002e-07	7.067441e-06	A0A3Q7EVQ8	EF-hand domain-containing protein	-	-	-	-	IPR002048;IPR011992;IPR018247	EF-hand domain;EF-hand domain pair;EF-Hand 1, calcium-binding site	-	-	GO:0005509	molecular_function	Binding to a calcium ion (Ca2+).	-	-	-
Solyc05g042120.4	Solyc05g042120.4	23.64830276124188	19.04272583408603	22.78506319762201	6.8267493886645925	7.783559957048982	7.64201979255615	5.21814553198453	1.30307918283222	3.67469e-07	7.077153e-06	A0A3Q7HDB7	Orc1-like AAA ATPase domain-containing protein	XP_010321564.1;XP_010321565.1;XP_004240158.1	uncharacterized protein LOC101251886;-;uncharacterized protein LOC101251886	-	-	IPR027417	P-loop containing nucleoside triphosphate hydrolase	-	-	-	-	-	-	-	-
Solyc01g087840.3	Solyc01g087840.3	14.003871578335785	12.775425662252506	13.465378107982724	3.890461480421668	4.06312731284716	4.743917478449077	4.5012846392844	1.41171554391496	3.699367e-07	7.103516e-06	O82777	Subtilisin-like protease SBT3	NP_001234774.1	subtilisin-like protease precursor	PF17766;PF05922;PF00082	Fibronectin type-III domain;Peptidase inhibitor I9;Subtilase family	IPR000209;IPR010259;IPR015500;IPR023828;IPR034197;IPR036852;IPR037045;IPR041469;IPR045051	Peptidase S8/S53 domain;Peptidase S8 propeptide/proteinase inhibitor I9;Peptidase S8, subtilisin-related;Peptidase S8, subtilisin, Ser-active site;Cucumisin-like catalytic domain;Peptidase S8/S53 domain superfamily;Peptidase S8 propeptide/proteinase inhibitor I9 superfamily;Subtilisin-like protease, fibronectin type-III domain;Subtilisin-like protease	ENOG502QT5U	-	GO:1900367;GO:0005615;GO:0043171;GO:0008236;GO:1902066;GO:0042802;GO:0042803;GO:0010628;GO:0097264;GO:0005576;GO:0009827;GO:0006508;GO:0006952;GO:0004252;GO:0009611	biological_process;cellular_component;biological_process;molecular_function;biological_process;molecular_function;molecular_function;biological_process;biological_process;cellular_component;biological_process;biological_process;biological_process;molecular_function;biological_process	Any process that activates or increases the frequency, rate or extent of defense response to insect.;That part of a multicellular organism outside the cells proper, usually taken to be outside the plasma membranes, and occupied by fluid.;The chemical reactions and pathways resulting in the breakdown of peptides, compounds of 2 or more (but usually less than 100) amino acids where the alpha carbox…	-	-	-
Solyc09g007680.4	Solyc09g007680.4	6.179266364379194	5.597385244948152	5.12354923666272	1.2810126622764968	1.602745940315874	1.2643924526705803	2.71531016324895	1.76294503003443	3.729489e-07	7.154274e-06	A0A3Q7HW09	RING-type domain-containing protein	-	-	PF12906;PF07727;PF13920	RING-variant domain;Reverse transcriptase (RNA-dependent DNA polymerase);Zinc finger, C3HC4 type (RING finger)	IPR001841;IPR011016;IPR013083;IPR013103;IPR043502;IPR045195	Zinc finger, RING-type;Zinc finger, RING-CH-type;Zinc finger, RING/FYVE/PHD-type;Reverse transcriptase, RNA-dependent DNA polymerase;DNA/RNA polymerase superfamily;LOG2-like, modified RING finger, C3HC5-type	-	-	GO:0016020;GO:0008270	cellular_component;molecular_function	A lipid bilayer along with all the proteins and protein complexes embedded in it and attached to it.;Binding to a zinc ion (Zn).	-	-	-
Solyc07g062790.1	Solyc07g062790.1	19.24170107220414	13.49931164314925	10.772132442148036	0.6565616898387805	0.8973940630752366	0.9607110596356304	1.95831104627013	3.82570062305105	3.874961e-07	7.367745e-06	A0A3Q7HHD8	Homeobox-leucine zipper protein	-	-	PF00046	Homeodomain	IPR001356;IPR009057;IPR017970;IPR045224	Homeobox domain;Homeobox-like domain superfamily;Homeobox, conserved site;Homeobox-leucine zipper protein, class I, plant	-	-	GO:0000981;GO:0006357;GO:0006355;GO:0045893;GO:0005634;GO:0003677;GO:0043565	molecular_function;biological_process;biological_process;biological_process;cellular_component;molecular_function;molecular_function	A DNA-binding transcription factor activity that modulates the transcription of specific gene sets transcribed by RNA polymerase II.;Any process that modulates the frequency, rate or extent of transcription mediated by RNA polymerase II.;Any process that modulates the frequency, rate or extent of cellular DNA-templated transcription.;Any process that activates or increases the frequency, rate or …	-	-	-
Solyc11g013450.2	Solyc11g013450.2	12.354033340965112	9.459054107190587	12.76512862571414	1.6339770561598608	1.475874329283151	1.867280854289738	2.09989195975074	2.55325084763177	3.879989e-07	7.37008e-06	A0A3Q7ISE1	Uncharacterized protein	XP_004250349.1	histone-lysine N-methyltransferase, H3 lysine-79 specific-like	PF05340	Protein of unknown function (DUF740)	IPR008004	Protein OCTOPUS-like	-	-	-	-	-	-	-	-
Solyc03g119060.3	Solyc03g119060.3	35.854933546613424	38.39657414817172	40.80203912017399	11.105338927415758	9.753301888311992	11.104100102858045	5.89053726796976	1.59771530333262	3.911867e-07	7.408862e-06	Q5WM33	Alpha-dioxygenase 2	NP_001234061.2	alpha-dioxygenase 2	PF03098	Animal haem peroxidase	IPR010255;IPR019791;IPR034815;IPR037120	Haem peroxidase superfamily;Haem peroxidase, animal-type;Alpha-dioxygenase;Haem peroxidase domain superfamily, animal type	KOG2408	Peroxidase/oxygenase	GO:0016702;GO:0020037;GO:0051213;GO:0046872;GO:0004601;GO:0031408;GO:0006633;GO:0006979;GO:0098869;GO:0006631	molecular_function;molecular_function;molecular_function;molecular_function;molecular_function;biological_process;biological_process;biological_process;biological_process;biological_process	Catalysis of an oxidation-reduction (redox) reaction in which hydrogen or electrons are transferred from one donor, and two oxygen atoms is incorporated into a donor.;Binding to a heme, a compound composed of iron complexed in a porphyrin (tetrapyrrole) ring.;Catalysis of an oxidation-reduction (redox) reaction in which both atoms of oxygen from one molecule of O2 are incorporated into the (reduc…	K10529	ko00592	alpha-Linolenic acid metabolism
Solyc01g108670.4	Solyc01g108670.4	2.490545255297948	2.474913890965371	2.619336043016197	0.843932954928773	0.845514470598096	0.8720217189206044	3.89410099848859	1.31612634351101	3.928337e-07	7.425553e-06	A0A3Q7ET02	Kinesin motor domain-containing protein	-	-	PF00225	Kinesin motor domain	IPR001752;IPR019821;IPR027417;IPR036961;IPR044986	Kinesin motor domain;Kinesin motor domain, conserved site;P-loop containing nucleoside triphosphate hydrolase;Kinesin motor domain superfamily;Kinesin-like protein KIF15/KIN-12	-	-	GO:0003777;GO:0005524;GO:0003774;GO:0008017;GO:0007018	molecular_function;molecular_function;molecular_function;molecular_function;biological_process	A motor activity that generates movement along a microtubule, driven by ATP hydrolysis.;Binding to ATP, adenosine 5'-triphosphate, a universally important coenzyme and enzyme regulator.;Generation of force resulting in movement, for example along a microfilament or microtubule, or in torque resulting in membrane scission or rotation of a flagellum. The energy required is obtained either from the …	-	-	-
Solyc08g008310.3	Solyc08g008310.3	1.7454160372294647	2.047747372042921	2.2129768939935786	0.1999905869319389	0.1471878279655128	0.1655311146402054	1.26544318433413	3.30938336474069	3.970431e-07	7.474186e-06	A0A3Q7HWQ1	Long-chain-fatty-acid--CoA ligase	-	-	PF02096;PF00501	60Kd inner membrane protein;AMP-binding enzyme	IPR000873;IPR020845;IPR028055;IPR042099;IPR045311	AMP-dependent synthetase/ligase domain;AMP-binding, conserved site;Membrane insertase YidC/Oxa/ALB, C-terminal;ANL, N-terminal domain;Long-chain fatty acid CoA synthetase, eukaryotic	-	-	GO:0016874;GO:0005524;GO:0016207;GO:0016020;GO:0005783;GO:0001676;GO:0004467;GO:0009698;GO:0006631	molecular_function;molecular_function;molecular_function;cellular_component;cellular_component;biological_process;molecular_function;biological_process;biological_process	Catalysis of the joining of two molecules, or two groups within a single molecule, using the energy from the hydrolysis of ATP, a similar triphosphate, or a pH gradient.;Binding to ATP, adenosine 5'-triphosphate, a universally important coenzyme and enzyme regulator.;Catalysis of the reaction: ATP + 4-coumarate + CoA = AMP + diphosphate + 4-coumaroyl-CoA.;A lipid bilayer along with all the protei…	-	-	-
Solyc04g009260.3	Solyc04g009260.3	9.546922431823596	8.577747114764536	9.817219015046884	3.10901270776599	3.425121684180824	3.1826764783116204	3.95977869476245	1.27184413273888	3.999015e-07	7.500667e-06	Q71BG9	ToMV resistance protein Tm-2(2)	-	-	PF00931;PF18052	NB-ARC domain;Rx N-terminal domain	IPR002182;IPR003593;IPR027417;IPR032675;IPR036388;IPR038005;IPR041118;IPR042197;IPR044974	NB-ARC;AAA+ ATPase domain;P-loop containing nucleoside triphosphate hydrolase;Leucine-rich repeat domain superfamily;Winged helix-like DNA-binding domain superfamily;Virus X resistance protein-like, coiled-coil domain;Disease resistance, N-terminal;Apoptotic protease-activating factors, helical domain;Disease resistance protein, plants	-	-	GO:0005886;GO:0005515;GO:0051607;GO:0043531;GO:0016887;GO:0006952;GO:0098542;GO:0009626;GO:0005524	cellular_component;molecular_function;biological_process;molecular_function;molecular_function;biological_process;biological_process;biological_process;molecular_function	The membrane surrounding a cell that separates the cell from its external environment. It consists of a phospholipid bilayer and associated proteins.;Binding to a protein.;Reactions triggered in response to the presence of a virus that act to protect the cell or organism.;Binding to ADP, adenosine 5'-diphosphate.;Catalysis of the reaction: ATP + H2O = ADP + H+ phosphate. ATP hydrolysis is used in…	-	-	-
Solyc02g077260.3	Solyc02g077260.3	8.850610621351443	8.515289292070339	10.111251128020143	1.5567957594115411	2.191890336456565	1.6702146350741278	2.95338200251286	2.08191489014771	4.004905e-07	7.502924e-06	A0A3Q7F5A0	Protein IQ-DOMAIN 1	XP_004232951.1	protein IQ-DOMAIN 1	PF00612	IQ calmodulin-binding motif	IPR000048	IQ motif, EF-hand binding site	-	-	GO:0005516	molecular_function	Binding to calmodulin, a calcium-binding protein with many roles, both in the calcium-bound and calcium-free states.	-	-	-
Solyc05g010400.3	Solyc05g010400.3	11.163700773917354	9.832565290499977	10.855721350102147	3.6950740514838056	3.381733818264141	3.565483573509868	4.14220841074851	1.32990501702254	4.007956e-07	7.502924e-06	Q8GUQ5	Brassinosteroid LRR receptor kinase	NP_001296180.1	brassinosteroid LRR receptor kinase precursor	PF20141;PF08263;PF00560;PF13855;PF00069	Brassinosteroid receptor island domain;Leucine rich repeat N-terminal domain;Leucine Rich Repeat;Leucine rich repeat;Protein kinase domain	IPR000719;IPR001611;IPR003591;IPR008271;IPR011009;IPR013210;IPR017441;IPR032675;IPR045381	Protein kinase domain;Leucine-rich repeat;Leucine-rich repeat, typical subtype;Serine/threonine-protein kinase, active site;Protein kinase-like domain superfamily;Leucine-rich repeat-containing N-terminal, plant-type;Protein kinase, ATP binding site;Leucine-rich repeat domain superfamily;Brassinosteroid receptor BRI1, island domain	ENOG502QRF2	-	GO:0005886;GO:0050832;GO:0004672;GO:0038023;GO:0009755;GO:0106310;GO:0009742;GO:0001578;GO:0005524;GO:0006952;GO:0009729;GO:0004674;GO:0005496;GO:0009647	cellular_component;biological_process;molecular_function;molecular_function;biological_process;molecular_function;biological_process;biological_process;molecular_function;biological_process;biological_process;molecular_function;molecular_function;biological_process	The membrane surrounding a cell that separates the cell from its external environment. It consists of a phospholipid bilayer and associated proteins.;Reactions triggered in response to the presence of a fungus that act to protect the cell or organism.;Catalysis of the phosphorylation of an amino acid residue in a protein, usually according to the reaction: a protein + ATP = a phosphoprotein + ADP…	K13415	ko04075	Plant hormone signal transduction
Solyc07g065410.1	Solyc07g065410.1	214.7314017375899	179.9527366733819	161.8109295265758	47.793828892675926	51.282077774906526	37.6107248614038	5.07524602555554	1.76763011434359	4.088321e-07	7.616609e-06	A0A3Q7HIQ9	Uncharacterized protein	-	-	-	-	-	-	-	-	-	-	-	-	-	-
Solyc11g069470.3	Solyc11g069470.3	8.20981670204136	5.68696789615239	5.7662699762757565	1.1363567708748123	1.4318962558348147	1.3467055858210837	3.42965	2.06372073015376	4.16237e-07	7.710124e-06	A0A3Q7J0V0	Uncharacterized protein	-	-	PF00046;PF08670;PF01852	Homeodomain;MEKHLA domain;START domain	IPR001356;IPR002913;IPR009057;IPR013978;IPR023393;IPR044830	Homeobox domain;START domain;Homeobox-like domain superfamily;MEKHLA;START-like domain superfamily;Class III homeodomain-leucine zipper family	-	-	GO:0003700;GO:0006355;GO:0008289;GO:0005634;GO:0003677;GO:0030154	molecular_function;biological_process;molecular_function;cellular_component;molecular_function;biological_process	A transcription regulator activity that modulates transcription of gene sets via selective and non-covalent binding to a specific double-stranded genomic DNA sequence (sometimes referred to as a motif) within a cis-regulatory region. Regulatory regions include promoters (proximal and distal) and enhancers. Genes are transcriptional units, and include bacterial operons.;Any process that modulates …	-	-	-
Solyc07g023990.3	Solyc07g023990.3	2.9099295159640715	3.1790211674514306	3.1929271840983144	0.3936221162103001	0.289695556240853	0.2565666117404943	1.09624185811245	3.05617793599815	4.183306e-07	7.741512e-06	A0A3Q7J2P8	AAA+ ATPase domain-containing protein	-	-	PF00004;PF12796	ATPase family associated with various cellular activities (AAA);Ankyrin repeats (3 copies)	IPR000641;IPR002110;IPR003593;IPR003959;IPR027417;IPR036770	CbxX/CfxQ;Ankyrin repeat;AAA+ ATPase domain;ATPase, AAA-type, core;P-loop containing nucleoside triphosphate hydrolase;Ankyrin repeat-containing domain superfamily	-	-	GO:0016887;GO:0005524	molecular_function;molecular_function	Catalysis of the reaction: ATP + H2O = ADP + H+ phosphate. ATP hydrolysis is used in some reactions as an energy source, for example to catalyze a reaction or drive transport against a concentration gradient.;Binding to ATP, adenosine 5'-triphosphate, a universally important coenzyme and enzyme regulator.	-	-	-
Solyc01g104030.3	Solyc01g104030.3	9.29363161162287	7.756906780537232	8.03598563092448	1.7445977517425044	2.0392594935353854	2.4526663036894347	3.85414374434487	1.75276875112033	4.223875e-07	7.809135e-06	A0A3Q7EQE3	Potassium channel	XP_004230485.1	potassium channel AKT2/3 isoform X2	PF12796;PF00027;PF00520;PF11834	Ankyrin repeats (3 copies);Cyclic nucleotide-binding domain;Ion transport protein;KHA, dimerisation domain of potassium ion channel	IPR000595;IPR002110;IPR003938;IPR005821;IPR014710;IPR018490;IPR021789;IPR036770;IPR045319	Cyclic nucleotide-binding domain;Ankyrin repeat;Potassium channel, voltage-dependent, EAG/ELK/ERG;Ion transport domain;RmlC-like jelly roll fold;Cyclic nucleotide-binding domain superfamily;KHA domain;Ankyrin repeat-containing domain superfamily;Potassium channel KAT/AKT	-	-	GO:0005267;GO:0016020;GO:0034702;GO:0071805;GO:0055085;GO:0005249;GO:0006813	molecular_function;cellular_component;cellular_component;biological_process;biological_process;molecular_function;biological_process	Enables the energy-independent facilitated diffusion of a potassium ion through a transmembrane aqueous pore or channel.;A lipid bilayer along with all the proteins and protein complexes embedded in it and attached to it.;A protein complex that spans a membrane and forms a water-filled channel across the phospholipid bilayer allowing selective monoatomic ion transport down its electrochemical gra…	K21867	-	-
Solyc02g063430.4	Solyc02g063430.4	20.573247359648025	19.65025501063211	22.226370250647413	1.9712311331501844	3.157567867752048	3.7430301024764816	3.85236881283969	2.55893782476453	4.23823e-07	7.81385e-06	A0A3Q7HRZ6	Transcription factor MYC2	NP_001311412.1	transcription factor MYC2	PF14215;PF00010	bHLH-MYC and R2R3-MYB transcription factors N-terminal;Helix-loop-helix DNA-binding domain	IPR011598;IPR025610;IPR036638;IPR045084	Myc-type, basic helix-loop-helix (bHLH) domain;Transcription factor MYC/MYB N-terminal;Helix-loop-helix DNA-binding domain superfamily;Transcription factor AIB/MYC-like	-	-	GO:0043565;GO:0045893;GO:0005515;GO:0046983;GO:0003677;GO:0003700;GO:0006355;GO:0005634;GO:0006952;GO:0000976	molecular_function;biological_process;molecular_function;molecular_function;molecular_function;molecular_function;biological_process;cellular_component;biological_process;molecular_function	Binding to DNA of a specific nucleotide composition, e.g. GC-rich DNA binding, or with a specific sequence motif or type of DNA e.g. promotor binding or rDNA binding.;Any process that activates or increases the frequency, rate or extent of cellular DNA-templated transcription.;Binding to a protein.;The formation of a protein dimer, a macromolecular structure consists of two noncovalently associat…	K13422	ko04016;ko04075	MAPK signaling pathway - plant;Plant hormone signal transduction
Solyc02g083540.3	Solyc02g083540.3	24.290794782853347	20.074437734377668	24.11092986569772	6.660770766480381	7.965998023675108	7.7527737025931955	4.91810160581239	1.36020814619403	4.282173e-07	7.886844e-06	A0A3Q7F6L0	MCAfunc domain-containing protein	XP_004232512.1;XP_010316435.1	protein MID1-COMPLEMENTING ACTIVITY 1;protein MID1-COMPLEMENTING ACTIVITY 1	PF19584;PF04749	MCAfunc domain;PLAC8 family	IPR006461;IPR036537;IPR045766	PLAC8 motif-containing protein;Adaptor protein Cbl, N-terminal domain superfamily;MCAfunc domain	-	-	GO:0007166	biological_process	The series of molecular signals initiated by an extracellular ligand binding to a receptor located on the cell surface. The pathway ends with regulation of a downstream cellular process, e.g. transcription.	-	-	-
Solyc01g109370.3	Solyc01g109370.3	7.686292869588046	6.713073081853306	7.315244150050002	1.5496879962476031	1.8388132387750329	1.2368586947489724	2.73374255856918	1.96941296118008	4.336979e-07	7.965092e-06	A0A3Q7ET89	1-acylglycerol-3-phosphate O-acyltransferase	XP_004230941.1;XP_010315294.1;XP_004230940.1	probable 1-acyl-sn-glycerol-3-phosphate acyltransferase 5;probable 1-acyl-sn-glycerol-3-phosphate acyltransferase 5;probable 1-acyl-sn-glycerol-3-phosphate acyltransferase 5	PF01553;PF16076	Acyltransferase;Acyltransferase C-terminus	IPR002123;IPR032098	Phospholipid/glycerol acyltransferase;Acyltransferase, C-terminal domain	-	-	GO:0016746;GO:0016024;GO:0016020;GO:0012505;GO:0003841	molecular_function;biological_process;cellular_component;cellular_component;molecular_function	Catalysis of the transfer of an acyl group from one compound (donor) to another (acceptor).;The chemical reactions and pathways resulting in the formation of CDP-diacylglycerol, CDP-1,2-diacylglycerol, a substance composed of diacylglycerol in glycosidic linkage with cytidine diphosphate.;A lipid bilayer along with all the proteins and protein complexes embedded in it and attached to it.;A collec…	K13513	ko00564;ko01110;ko00561;ko01100	Glycerophospholipid metabolism;Biosynthesis of secondary metabolites;Glycerolipid metabolism;Metabolic pathways
Solyc01g104710.3	Solyc01g104710.3	115.75584748866288	92.06488862736715	123.7677486009662	20.40125898588113	18.438359798003344	24.99899592058854	5.53474820160896	2.12409923334933	4.449001e-07	8.132321e-06	A0A3Q7EQV7	Uncharacterized protein	-	-	-	-	-	-	-	-	-	-	-	-	-	-
Solyc08g075120.3	Solyc08g075120.3	11.67304295524387	11.117556460230618	10.453146276656856	3.7895910636594743	3.5029009950019145	3.864768598709111	3.96966733413839	1.3226840032106	4.480301e-07	8.181823e-06	A0A3Q7IM01	PRONE domain-containing protein	XP_004246024.1;XP_010325627.1;XP_004246025.1	rop guanine nucleotide exchange factor 14 isoform X1;-;rop guanine nucleotide exchange factor 14 isoform X1	PF03759	PRONE (Plant-specific Rop nucleotide exchanger)	IPR005512;IPR038937	PRONE domain;Rop guanine nucleotide exchange factor	-	-	GO:0005886;GO:0005085	cellular_component;molecular_function	The membrane surrounding a cell that separates the cell from its external environment. It consists of a phospholipid bilayer and associated proteins.;Stimulates the exchange of GDP to GTP on a signaling GTPase, changing its conformation to its active form. Guanine nucleotide exchange factors (GEFs) act by stimulating the release of guanosine diphosphate (GDP) to allow binding of guanosine triphos…	-	-	-
Solyc09g092310.1	Solyc09g092310.1	8.894049110904112	8.407897482513347	7.683441906916992	2.796752204072361	3.236556369583471	2.9095351501623883	3.8112062653522	1.22639954843398	4.687343e-07	8.459288e-06	Q71BH1	ToMV susceptible protein tm-2	NP_001318061.1	Tm-2 ToMV resistant protein	PF00931;PF18052	NB-ARC domain;Rx N-terminal domain	IPR002182;IPR003593;IPR027417;IPR032675;IPR036388;IPR038005;IPR041118;IPR042197;IPR044974	NB-ARC;AAA+ ATPase domain;P-loop containing nucleoside triphosphate hydrolase;Leucine-rich repeat domain superfamily;Winged helix-like DNA-binding domain superfamily;Virus X resistance protein-like, coiled-coil domain;Disease resistance, N-terminal;Apoptotic protease-activating factors, helical domain;Disease resistance protein, plants	KOG4658	Apoptotic ATPase	GO:0005886;GO:0043531;GO:0016887;GO:0006952;GO:0098542;GO:0005524	cellular_component;molecular_function;molecular_function;biological_process;biological_process;molecular_function	The membrane surrounding a cell that separates the cell from its external environment. It consists of a phospholipid bilayer and associated proteins.;Binding to ADP, adenosine 5'-diphosphate.;Catalysis of the reaction: ATP + H2O = ADP + H+ phosphate. ATP hydrolysis is used in some reactions as an energy source, for example to catalyze a reaction or drive transport against a concentration gradient…	-	-	-
Solyc09g014160.3	Solyc09g014160.3	11.605823998471475	10.609334744615882	10.54614364965542	3.8299431907262194	3.3678425210982077	3.3578571815777023	3.7933942485545	1.38214926577554	4.697497e-07	8.459288e-06	A0A3Q7HYB0	Uncharacterized protein	-	-	PF05340	Protein of unknown function (DUF740)	IPR008004	Protein OCTOPUS-like	-	-	GO:0005886;GO:0016020	cellular_component;cellular_component	The membrane surrounding a cell that separates the cell from its external environment. It consists of a phospholipid bilayer and associated proteins.;A lipid bilayer along with all the proteins and protein complexes embedded in it and attached to it.	-	-	-
Solyc09g015010.2	Solyc09g015010.2	3.0140928289430744	3.0247682667527456	2.6895209588851943	0.9025084321738864	0.7865793250118402	0.766659220346469	3.48927759601527	1.57841110007794	4.761467e-07	8.550359e-06	P30221	17.8 kDa class I heat shock protein	-	-	PF00011	Hsp20/alpha crystallin family	IPR002068;IPR008978;IPR031107	Alpha crystallin/Hsp20 domain;HSP20-like chaperone;Small heat shock protein	KOG0710	Molecular chaperone (small heat-shock protein Hsp26/Hsp42)	GO:0009408;GO:0006457;GO:0051259;GO:0051082;GO:0042542;GO:0009651;GO:0005737	biological_process;biological_process;biological_process;molecular_function;biological_process;biological_process;cellular_component	Any process that results in a change in state or activity of a cell or an organism (in terms of movement, secretion, enzyme production, gene expression, etc.) as a result of a heat stimulus, a temperature stimulus above the optimal temperature for that organism.;The process of assisting in the covalent and noncovalent assembly of single chain polypeptides or multisubunit complexes into the correc…	-	-	-
Solyc02g067760.4	Solyc02g067760.4	155.55451274404163	143.8709089650306	160.34150467342954	50.63375205876247	53.92805585148407	59.0595225272546	6.52629518447706	1.23824638457234	4.792769e-07	8.57614e-06	A0A3Q7FLV3	MYB transcription factor 21	XP_004233330.1	-	PF00249	Myb-like DNA-binding domain	IPR001005;IPR009057;IPR017930;IPR044676	SANT/Myb domain;Homeobox-like domain superfamily;Myb domain;MYB-like transcription factor EOBI/EOBII-like, plant	-	-	GO:0003700;GO:0010597;GO:0006355;GO:0005634;GO:0000976;GO:0043565	molecular_function;biological_process;biological_process;cellular_component;molecular_function;molecular_function	A transcription regulator activity that modulates transcription of gene sets via selective and non-covalent binding to a specific double-stranded genomic DNA sequence (sometimes referred to as a motif) within a cis-regulatory region. Regulatory regions include promoters (proximal and distal) and enhancers. Genes are transcriptional units, and include bacterial operons.;The chemical reactions and …	-	-	-
Solyc02g077710.1	Solyc02g077710.1	1012.8514464004496	831.1956864404225	830.9315805595852	255.0636885452405	297.0416612235693	248.24310358210093	9.15178595939229	1.48619350318127	4.793511e-07	8.57614e-06	A0A3Q7F467	Protein E6	XP_004232917.1	homeobox protein 2	-	-	IPR040290	Protein E6-like	-	-	-	-	-	-	-	-
Solyc01g010440.4	Solyc01g010440.4	58.72333514697996	53.68700069116033	54.04414725551002	23.75603387460716	23.69817507336455	21.75992001760876	6.18199034362173	1.01197691475167	4.805651e-07	8.589936e-06	A0A3Q7EA25	Glycine-rich protein	-	-	-	-	-	-	-	-	-	-	-	-	-	-
Solyc01g103430.4	Solyc01g103430.4	175.9185900402418	176.49047497597613	174.25494532233395	62.64385411476754	62.54310058823356	63.673957672309285	8.10934472644456	1.22711862605447	4.824994e-07	8.60073e-06	A0A3Q7EPT4	non-specific serine/threonine protein kinase	-	-	PF00069	Protein kinase domain	IPR000719;IPR008271;IPR011009;IPR017441;IPR039192	Protein kinase domain;Serine/threonine-protein kinase, active site;Protein kinase-like domain superfamily;Protein kinase, ATP binding site;Glycogen synthase kinase 3, catalytic domain	-	-	GO:0004674;GO:0005524;GO:0007165;GO:0005737;GO:0004672;GO:0005634;GO:0030154	molecular_function;molecular_function;biological_process;cellular_component;molecular_function;cellular_component;biological_process	Catalysis of the reactions: ATP + protein serine = ADP + protein serine phosphate, and ATP + protein threonine = ADP + protein threonine phosphate.;Binding to ATP, adenosine 5'-triphosphate, a universally important coenzyme and enzyme regulator.;The cellular process in which a signal is conveyed to trigger a change in the activity or state of a cell. Signal transduction begins with reception of a…	-	-	-
Solyc04g007070.3	Solyc04g007070.3	7.225897541297248	7.354472021655787	6.638238058907458	2.325145699784814	2.660636318713089	2.2688790975312245	3.83348549391878	1.2937850401681	4.861243e-07	8.649445e-06	Q71BH1	ToMV susceptible protein tm-2	NP_001318061.1	Tm-2 ToMV resistant protein	PF00931;PF18052	NB-ARC domain;Rx N-terminal domain	IPR002182;IPR003593;IPR027417;IPR032675;IPR036388;IPR038005;IPR041118;IPR042197;IPR044974	NB-ARC;AAA+ ATPase domain;P-loop containing nucleoside triphosphate hydrolase;Leucine-rich repeat domain superfamily;Winged helix-like DNA-binding domain superfamily;Virus X resistance protein-like, coiled-coil domain;Disease resistance, N-terminal;Apoptotic protease-activating factors, helical domain;Disease resistance protein, plants	KOG4658	Apoptotic ATPase	GO:0005886;GO:0043531;GO:0016887;GO:0006952;GO:0098542;GO:0005524	cellular_component;molecular_function;molecular_function;biological_process;biological_process;molecular_function	The membrane surrounding a cell that separates the cell from its external environment. It consists of a phospholipid bilayer and associated proteins.;Binding to ADP, adenosine 5'-diphosphate.;Catalysis of the reaction: ATP + H2O = ADP + H+ phosphate. ATP hydrolysis is used in some reactions as an energy source, for example to catalyze a reaction or drive transport against a concentration gradient…	-	-	-
Solyc03g034000.3	Solyc03g034000.3	33.56214375048356	48.01311867846408	40.19247499413059	5.827970402942862	4.009500786500224	4.404320154886563	4.64598648624462	2.85701548016324	4.866031e-07	8.650027e-06	A0A3Q7FG06	BHLH domain-containing protein	XP_004234555.1	transcription factor BEE 2	PF00010	Helix-loop-helix DNA-binding domain	IPR011598;IPR024097;IPR036638	Myc-type, basic helix-loop-helix (bHLH) domain;Basic helix-loop-helix leucine zipper transcription factor;Helix-loop-helix DNA-binding domain superfamily	-	-	GO:0003700;GO:0006355;GO:0005634;GO:0046983	molecular_function;biological_process;cellular_component;molecular_function	A transcription regulator activity that modulates transcription of gene sets via selective and non-covalent binding to a specific double-stranded genomic DNA sequence (sometimes referred to as a motif) within a cis-regulatory region. Regulatory regions include promoters (proximal and distal) and enhancers. Genes are transcriptional units, and include bacterial operons.;Any process that modulates …	-	-	-
Solyc02g087880.3	Solyc02g087880.3	10.310579185624206	9.735207466358585	9.438957873747489	3.1538763952980697	2.7591269938381084	3.0475728477867428	3.36550522731485	1.4682006971362	4.93587e-07	8.750115e-06	A0A3Q7F8W6	Tubulin alpha chain	XP_004232226.1	tubulin alpha chain-like	PF00091;PF03953	Tubulin/FtsZ family, GTPase domain;Tubulin C-terminal domain	IPR000217;IPR002452;IPR003008;IPR008280;IPR017975;IPR018316;IPR023123;IPR036525;IPR037103	Tubulin;Alpha tubulin;Tubulin/FtsZ, GTPase domain;Tubulin/FtsZ, C-terminal;Tubulin, conserved site;Tubulin/FtsZ, 2-layer sandwich domain;Tubulin, C-terminal;Tubulin/FtsZ, GTPase domain superfamily;Tubulin/FtsZ-like, C-terminal domain	-	-	GO:0000226;GO:0005874;GO:0005525;GO:0016787;GO:0005737;GO:0005200;GO:0007017;GO:0000278	biological_process;cellular_component;molecular_function;molecular_function;cellular_component;molecular_function;biological_process;biological_process	A process that is carried out at the cellular level which results in the assembly, arrangement of constituent parts, or disassembly of cytoskeletal structures comprising microtubules and their associated proteins.;Any of the long, generally straight, hollow tubes of internal diameter 12-15 nm and external diameter 24 nm found in a wide variety of eukaryotic cells; each consists (usually) of 13 pr…	K07374	ko05130;ko04210;ko04145;ko04540;ko04530	Pathogenic Escherichia coli infection;Apoptosis;Phagosome;Gap junction;Tight junction
Solyc09g074230.4	Solyc09g074230.4	17.333628333253802	13.51101453340602	13.37089600356084	3.1778185730346453	4.387820551784643	3.325653387737171	3.94829217177874	1.75858461683566	4.993069e-07	8.835363e-06	Q9LEG2	Putative sugar transporter	-	-	PF00083	Sugar (and other) transporter	IPR003663;IPR005828;IPR005829;IPR020846;IPR036259;IPR044775	Sugar/inositol transporter;Major facilitator, sugar transporter-like;Sugar transporter, conserved site;Major facilitator superfamily domain;MFS transporter superfamily;Sugar transporter ERD6/Tret1-like	-	-	GO:0009705;GO:0008643;GO:0051119;GO:0016020;GO:0055085;GO:0034219;GO:0006829	cellular_component;biological_process;molecular_function;cellular_component;biological_process;biological_process;biological_process	The lipid bilayer surrounding a vacuole that retains the same shape regardless of cell cycle phase. The membrane separates its contents from the cytoplasm of the cell. An example of this component is found in Arabidopsis thaliana.;The directed movement of carbohydrate into, out of or within a cell, or between cells, by means of some agent such as a transporter or pore. Carbohydrates are a group o…	-	-	-
Solyc06g084480.3	Solyc06g084480.3	15.499627540028447	14.911482842955404	15.551050700121648	6.241080701889548	6.465029984241568	6.24727853764096	5.05304990408553	1.02617245147368	5.038108e-07	8.874652e-06	A0A3Q7H5W7	Protease Do-like PDZ domain-containing protein	XP_010323029.1	protease Do-like 2, chloroplastic	PF17815;PF13365	PDZ domain;Trypsin-like peptidase domain	IPR001940;IPR009003;IPR036034;IPR041517;IPR043504;IPR046449	Peptidase S1C;Peptidase S1, PA clan;PDZ superfamily;Protease Do-like, PDZ domain;Peptidase S1, PA clan, chymotrypsin-like fold;Protease Do-like, PDZ domain superfamily	-	-	GO:0006508;GO:0004252;GO:0043231	biological_process;molecular_function;cellular_component	The hydrolysis of proteins into smaller polypeptides and/or amino acids by cleavage of their peptide bonds.;Catalysis of the hydrolysis of internal, alpha-peptide bonds in a polypeptide chain by a catalytic mechanism that involves a catalytic triad consisting of a serine nucleophile that is activated by a proton relay involving an acidic residue (e.g. aspartate or glutamate) and a basic residue (…	-	-	-
Solyc03g078700.2	Solyc03g078700.2	41.9250547200318	47.262867637531485	40.80705864438298	12.633279706167546	11.740970293691785	10.561443084094456	3.82552337239284	1.64515751148654	5.038152e-07	8.874652e-06	K4D3V7	UDP-glycosyltransferase 76E1	XP_019071658.1;XP_004249656.1	-;-	PF00201	UDP-glucoronosyl and UDP-glucosyl transferase	IPR002213;IPR035595	UDP-glucuronosyl/UDP-glucosyltransferase;UDP-glycosyltransferase family, conserved site	KOG1192	UDP-glucuronosyl and UDP-glucosyl transferase	GO:0047215;GO:0008194;GO:0080044;GO:0080043;GO:0005634;GO:0016757;GO:0010294;GO:0005737	molecular_function;molecular_function;molecular_function;molecular_function;cellular_component;molecular_function;molecular_function;cellular_component	Catalysis of the reaction: (indol-3-yl)acetate + UDP-D-glucose = 1-O-(indol-3-ylacetyl)-beta-D-glucose + UDP.;Catalysis of the transfer of a glycosyl group from a UDP-sugar to a small hydrophobic molecule.;Catalysis of the transfer of a glucosyl group from UDP-glucose to the 7-hydroxy group of a quercetin molecule.;Catalysis of the transfer of a glucosyl group from UDP-glucose to the 3-hydroxy gr…	-	-	-
Solyc12g014610.2	Solyc12g014610.2	19.195146738204357	17.38888271333691	18.04703075418654	7.139033221391106	7.786257524095856	7.768830601340925	4.84293293233879	1.01413584587219	5.129087e-07	9.018451e-06	D8VNC6	WRKY transcription factor 72B	NP_001234773.1	-	PF03106	WRKY DNA -binding domain	IPR003657;IPR036576;IPR044810	WRKY domain;WRKY domain superfamily;WRKY transcription factor, plant	-	-	GO:0043565;GO:0003677;GO:0003700;GO:0006355;GO:0005634;GO:0006952	molecular_function;molecular_function;molecular_function;biological_process;cellular_component;biological_process	Binding to DNA of a specific nucleotide composition, e.g. GC-rich DNA binding, or with a specific sequence motif or type of DNA e.g. promotor binding or rDNA binding.;Any molecular function by which a gene product interacts selectively and non-covalently with DNA (deoxyribonucleic acid).;A transcription regulator activity that modulates transcription of gene sets via selective and non-covalent bi…	-	-	-
Solyc12g005400.3	Solyc12g005400.3	15.947474659285808	14.328181247936945	14.336164023750335	5.152185482762652	6.241490759209177	5.752742677174213	4.43233491230674	1.12504136462084	5.142368e-07	9.033614e-06	A0A3Q7J1R1	Cyclic nucleotide-binding domain-containing protein	-	-	PF00027	Cyclic nucleotide-binding domain	IPR000595;IPR014710;IPR018490	Cyclic nucleotide-binding domain;RmlC-like jelly roll fold;Cyclic nucleotide-binding domain superfamily	-	-	GO:0016020	cellular_component	A lipid bilayer along with all the proteins and protein complexes embedded in it and attached to it.	-	-	-
Solyc03g031840.3	Solyc03g031840.3	28.134207648801823	27.22940752650397	24.9478666981096	6.44207034384825	6.429839595855449	4.314043431281697	4.1176829694503	1.96919691624465	5.234605e-07	9.160415e-06	Q9ZP33	Expansin	NP_001234078.1	expansin A3 precursor	PF03330;PF01357	Lytic transglycolase;Expansin C-terminal domain	IPR002963;IPR007112;IPR007117;IPR007118;IPR009009;IPR036749;IPR036908	Expansin;Expansin/pollen allergen, DPBB domain;Expansin, cellulose-binding-like domain;Expansin/Lol pI;RlpA-like protein, double-psi beta-barrel domain;Expansin, cellulose-binding-like domain superfamily;RlpA-like domain superfamily	ENOG502QVFR	-	GO:0009653;GO:0009664;GO:0016020;GO:0071555;GO:0005576	biological_process;biological_process;cellular_component;biological_process;cellular_component	The process in which anatomical structures are generated and organized. Morphogenesis pertains to the creation of form.;A process that results in the assembly and arrangement of constituent parts of the cellulose and pectin-containing cell wall, or in the disassembly of the cellulose and pectin-containing cell wall. This process is carried out at the cellular level. An example of this process is …	-	-	-
Solyc02g063270.4	Solyc02g063270.4	61.41666023632653	57.98140911398463	62.500262886744046	24.90254156483337	24.932384068394427	25.13078465743078	5.94873865135447	1.02649493434451	5.346346e-07	9.255948e-06	A0A3Q7EYZ5	Protein DETOXIFICATION	-	-	PF01554	MatE	IPR002528;IPR045069	Multi antimicrobial extrusion protein;Multidrug and toxic compound extrusion family, eukaryotic	-	-	GO:0015297;GO:0042910;GO:0022857;GO:0016020;GO:1990961	molecular_function;molecular_function;molecular_function;cellular_component;biological_process	Enables the active transport of a solute across a membrane by a mechanism whereby two or more species are transported in opposite directions in a tightly coupled process not directly linked to a form of energy other than chemiosmotic energy. The reaction is: solute A(out) + solute B(in) = solute A(in) + solute B(out).;Enables the directed movement of a xenobiotic from one side of a membrane to th…	-	-	-
Solyc06g074390.3	Solyc06g074390.3	6.012688002892199	5.6052931366902605	5.810969743533708	1.1711922321384165	1.3983016534135	1.623727249792586	2.73300396504901	1.80126968094489	5.412768e-07	9.339433e-06	A0A3Q7HW29	Fatty acyl-CoA reductase	XP_004241314.1	fatty acyl-CoA reductase 3	PF07993;PF03015	Male sterility protein;Male sterility protein	IPR013120;IPR026055;IPR033640;IPR036291	Fatty acyl-coenzyme A reductase, NAD-binding domain;Fatty acyl-CoA reductase;Fatty acyl-CoA reductase, C-terminal;NAD(P)-binding domain superfamily	-	-	GO:0102965;GO:0010345;GO:0006629;GO:0080019;GO:0043231;GO:0016491;GO:0016620;GO:0035336	molecular_function;biological_process;biological_process;molecular_function;cellular_component;molecular_function;molecular_function;biological_process	Catalysis of the reaction: a long-chain fatty acyl-CoA + 2 H+ + 2 NADPH = a long-chain primary fatty alcohol + CoA + 2 NADP+. A long-chain fatty acid has an aliphatic tail containing 13 to 22 carbons.;The chemical reactions and pathways resulting in the formation of suberin monomers and suberin polyesters. Suberin monomers are derived from fatty acids and trans-cinnamic acids. The monomers are th…	K13356	ko04212;ko00073;ko04146	Longevity regulating pathway - worm;Cutin, suberine and wax biosynthesis;Peroxisome
Solyc08g081170.4	Solyc08g081170.4	11.037800126563411	9.611664752723538	10.234391092444325	3.393714140045048	4.113833490812676	3.934607487789045	4.3411229759832	1.17823720576671	5.424543e-07	9.343124e-06	A0A3Q7HW63	Uncharacterized protein	XP_010325295.1;XP_010325293.1;XP_010325294.1	hop-interacting protein THI138 isoform X1;hop-interacting protein THI138 isoform X1;hop-interacting protein THI138 isoform X1	PF01225;PF02875;PF08245	Mur ligase family, catalytic domain;Mur ligase family, glutamate ligase domain;Mur ligase middle domain	IPR000713;IPR004101;IPR005761;IPR013221;IPR035911;IPR036565;IPR036615	Mur ligase, N-terminal catalytic domain;Mur ligase, C-terminal;UDP-N-acetylmuramoylalanyl-D-glutamate-2,6-diaminopimelate ligase;Mur ligase, central;MurE/MurF, N-terminal;Mur-like, catalytic domain superfamily;Mur ligase, C-terminal domain superfamily	-	-	GO:0016881;GO:0009058;GO:0005524;GO:0005737;GO:0008360;GO:0051301	molecular_function;biological_process;molecular_function;cellular_component;biological_process;biological_process	Catalysis of the ligation of an acid to an amino acid via a carbon-nitrogen bond, with the concomitant hydrolysis of the diphosphate bond in ATP or a similar triphosphate.;The chemical reactions and pathways resulting in the formation of substances; typically the energy-requiring part of metabolism in which simpler substances are transformed into more complex ones.;Binding to ATP, adenosine 5'-tr…	-	-	-
Solyc07g041340.2	Solyc07g041340.2	21.875771919962173	18.011205737871467	19.222552668196634	6.277880699653678	7.074919482871732	6.454614326780494	3.27200880311477	1.32103498328078	5.43566e-07	9.353966e-06	A0A3Q7I5H2	Protein EARLY FLOWERING 4 domain-containing protein	XP_004243721.1	protein ELF4-LIKE 3	PF07011	Early Flowering 4 domain	IPR009741;IPR040462	Protein EARLY FLOWERING 4 domain;Protein EARLY FLOWERING 4	-	-	GO:0009649;GO:0042753;GO:0005634;GO:0048511	biological_process;biological_process;cellular_component;biological_process	The synchronization of a circadian rhythm to environmental time cues such as light.;Any process that activates or increases the frequency, rate or extent of a circadian rhythm behavior.;A membrane-bounded organelle of eukaryotic cells in which chromosomes are housed and replicated. In most cells, the nucleus contains all of the cell's chromosomes except the organellar chromosomes, and is the site…	-	-	-
Solyc07g041970.4	Solyc07g041970.4	58.490251196550965	53.834368813536585	52.801321734837536	22.2851705933228	24.83071045430134	21.066715617888143	6.62054198708372	1.02330030374711	5.47549e-07	9.389183e-06	O82777	Subtilisin-like protease SBT3	NP_001234774.1	subtilisin-like protease precursor	PF17766;PF05922;PF00082	Fibronectin type-III domain;Peptidase inhibitor I9;Subtilase family	IPR000209;IPR010259;IPR015500;IPR023828;IPR034197;IPR036852;IPR037045;IPR041469;IPR045051	Peptidase S8/S53 domain;Peptidase S8 propeptide/proteinase inhibitor I9;Peptidase S8, subtilisin-related;Peptidase S8, subtilisin, Ser-active site;Cucumisin-like catalytic domain;Peptidase S8/S53 domain superfamily;Peptidase S8 propeptide/proteinase inhibitor I9 superfamily;Subtilisin-like protease, fibronectin type-III domain;Subtilisin-like protease	ENOG502QT5U	-	GO:1900367;GO:0005615;GO:0043171;GO:0008236;GO:1902066;GO:0042802;GO:0042803;GO:0010628;GO:0097264;GO:0005576;GO:0009827;GO:0006508;GO:0006952;GO:0004252;GO:0009611	biological_process;cellular_component;biological_process;molecular_function;biological_process;molecular_function;molecular_function;biological_process;biological_process;cellular_component;biological_process;biological_process;biological_process;molecular_function;biological_process	Any process that activates or increases the frequency, rate or extent of defense response to insect.;That part of a multicellular organism outside the cells proper, usually taken to be outside the plasma membranes, and occupied by fluid.;The chemical reactions and pathways resulting in the breakdown of peptides, compounds of 2 or more (but usually less than 100) amino acids where the alpha carbox…	-	-	-
Solyc08g077430.3	Solyc08g077430.3	32.13995364813748	26.4039742718944	24.024904784776524	8.40539403996813	9.876133592560626	8.003278910022441	6.34381929581099	1.39489457324594	5.509083e-07	9.421796e-06	A0A3Q7HSA1	Tyrosine-protein kinase ephrin type A/B receptor-like domain-containing protein	XP_010325537.1	uncharacterized protein LOC101256905 isoform X1	-	-	-	-	-	-	GO:0016020	cellular_component	A lipid bilayer along with all the proteins and protein complexes embedded in it and attached to it.	-	-	-
Solyc06g064660.4	Solyc06g064660.4	3.497217300452536	3.760938011010978	3.755666217992351	0.8047520712467384	0.800373544296173	0.6075810789134748	2.28998566985849	2.0615148060129	5.57231e-07	9.484413e-06	A0A3Q7GYG6	Protein kinase domain-containing protein	XP_004242255.1	probable serine/threonine-protein kinase At1g54610 isoform X1	PF00069	Protein kinase domain	IPR000719;IPR008271;IPR011009;IPR017441	Protein kinase domain;Serine/threonine-protein kinase, active site;Protein kinase-like domain superfamily;Protein kinase, ATP binding site	-	-	GO:0004674;GO:0005524;GO:0008353;GO:0004672;GO:0005634;GO:0000307;GO:0032968	molecular_function;molecular_function;molecular_function;molecular_function;cellular_component;cellular_component;biological_process	Catalysis of the reactions: ATP + protein serine = ADP + protein serine phosphate, and ATP + protein threonine = ADP + protein threonine phosphate.;Binding to ATP, adenosine 5'-triphosphate, a universally important coenzyme and enzyme regulator.;Catalysis of the reaction: ATP + RNA polymerase II large subunit CTD heptapeptide repeat (consensus YSPTSPS) = ADP + H+ + phosphorylated RNA polymerase I…	-	-	-
Solyc08g082210.4	Solyc08g082210.4	36.61243214266864	38.30274793314799	37.14528428326909	14.10960774345655	14.520169190342026	12.91237827018108	4.91805823903158	1.18074466430417	5.657705e-07	9.599785e-06	O04681	Pathogenesis-related genes transcriptional activator PTI5	NP_001233987.1	pathogenesis-related genes transcriptional activator PTI5	PF00847	AP2 domain	IPR001471;IPR016177;IPR036955;IPR044808	AP2/ERF domain;DNA-binding domain superfamily;AP2/ERF domain superfamily;Ethylene-responsive transcription factor	ENOG502RZBM	-	GO:0003677;GO:0009873;GO:0003700;GO:0006355;GO:0005634;GO:0006952	molecular_function;biological_process;molecular_function;biological_process;cellular_component;biological_process	Any molecular function by which a gene product interacts selectively and non-covalently with DNA (deoxyribonucleic acid).;The series of molecular signals generated by the reception of ethylene (ethene, C2H4) by a receptor and ending with modulation of a cellular process, e.g. transcription.;A transcription regulator activity that modulates transcription of gene sets via selective and non-covalent…	K13433	ko04626	Plant-pathogen interaction
Solyc08g061980.4	Solyc08g061980.4	12.515886032280864	10.779733908607565	10.441791777370504	3.799242243305568	4.430252022504155	4.111988605814281	3.89715587980983	1.19410619711149	5.706961e-07	9.658779e-06	A0A3Q7HM93	Mechanosensitive ion channel protein	XP_004245056.1	mechanosensitive ion channel protein 10	-	-	IPR006685;IPR010920;IPR011992;IPR016688;IPR023408	Mechanosensitive ion channel MscS;LSM domain superfamily;EF-hand domain pair;Mechanosensitive ion channel MscS-like, plants/fungi;Mechanosensitive ion channel MscS, beta-domain superfamily	-	-	GO:0034220;GO:0008381;GO:0050982;GO:0016020;GO:0055085;GO:0005886;GO:0006820	biological_process;molecular_function;biological_process;cellular_component;biological_process;cellular_component;biological_process	A process in which a monoatomic ion is transported across a membrane. Monatomic ions (also called simple ions) are ions consisting of exactly one atom.;Enables the transmembrane transfer of an monoatomic ion by a channel that opens in response to a mechanical stress.;The series of events by which a mechanical stimulus is received and converted into a molecular signal.;A lipid bilayer along with a…	K22048	-	-
Solyc06g075960.1	Solyc06g075960.1	1228.9003082128645	1092.6168779791628	1109.1196746933283	448.54526983697457	464.0463197836352	441.1796811010301	7.90824870306298	1.08695180742645	5.717347e-07	9.658779e-06	P35057	Histone H4	NP_001234121.1;NP_001234118.1;XP_004251292.1;XP_004239779.1;XP_004241478.1	histone H4;histone H4;histone H4;histone H4;histone H4	PF15511	Centromere kinetochore component CENP-T histone fold	IPR001951;IPR009072;IPR019809;IPR035425	Histone H4;Histone-fold;Histone H4, conserved site;CENP-T/Histone H4, histone fold	KOG3467	Histone H4	GO:0030527;GO:0005694;GO:0003677;GO:0006334;GO:0046982;GO:0005634;GO:0000786	molecular_function;cellular_component;molecular_function;biological_process;molecular_function;cellular_component;cellular_component	The action of a molecule that contributes to the structural integrity of chromatin.;A structure composed of a very long molecule of DNA and associated proteins (e.g. histones) that carries hereditary information.;Any molecular function by which a gene product interacts selectively and non-covalently with DNA (deoxyribonucleic acid).;The aggregation, arrangement and bonding together of a nucleosom…	K11254	ko05322;ko05203;ko05034	Systemic lupus erythematosus;Viral carcinogenesis;Alcoholism
Solyc02g087200.2	Solyc02g087200.2	62.88687442446967	63.230451787980456	71.70647844834915	22.59344638562862	21.36834519103292	21.86305178022638	5.93632474653197	1.33713524011255	5.717375e-07	9.658779e-06	A0A3Q7FW62	RING-type E3 ubiquitin transferase	XP_004232272.1	U-box domain-containing protein 40	PF00514;PF04564	Armadillo/beta-catenin-like repeat;U-box domain	IPR000225;IPR003613;IPR011989;IPR013083;IPR016024	Armadillo;U-box domain;Armadillo-like helical;Zinc finger, RING/FYVE/PHD-type;Armadillo-type fold	-	-	GO:0004842;GO:0016567;GO:0005634;GO:0005737	molecular_function;biological_process;cellular_component;cellular_component	Catalysis of the transfer of ubiquitin from one protein to another via the reaction X-Ub + Y = Y-Ub + X, where both X-Ub and Y-Ub are covalent linkages.;The process in which one or more ubiquitin groups are added to a protein.;A membrane-bounded organelle of eukaryotic cells in which chromosomes are housed and replicated. In most cells, the nucleus contains all of the cell's chromosomes except th…	-	-	-
Solyc01g100030.5.1	Solyc01g100030.5.1	6.306697897658184	4.919760490924329	4.301716488675237	0.6911175682513478	0.7629666123311728	0.8446442928614691	1.73363366061058	2.4909871751174	5.921046e-07	9.925044e-06	P32518	Deoxyuridine 5'-triphosphate nucleotidohydrolase	NP_001233870.1	dUTP diphosphatase	PF00692	dUTPase	IPR008181;IPR029054;IPR033704;IPR036157	Deoxyuridine triphosphate nucleotidohydrolase;dUTPase-like;dUTPase, trimeric;dUTPase-like superfamily	KOG3370	dUTPase	GO:0046872;GO:0006226;GO:0016787;GO:0000287;GO:0046081;GO:0009117;GO:0004170	molecular_function;biological_process;molecular_function;molecular_function;biological_process;biological_process;molecular_function	Binding to a metal ion.;The chemical reactions and pathways resulting in the formation of dUMP, deoxyuridine monophosphate (2'-deoxyuridine 5'-phosphate).;Catalysis of the hydrolysis of various bonds, e.g. C-O, C-N, C-C, phosphoric anhydride bonds, etc.;Binding to a magnesium (Mg) ion.;The chemical reactions and pathways resulting in the breakdown of dUTP, deoxyuridine (5'-)triphosphate.;The chem…	K01520	ko01100;ko00983;ko00240	Metabolic pathways;Drug metabolism - other enzymes;Pyrimidine metabolism
Solyc05g013210.3	Solyc05g013210.3	11.16247549736674	10.791340487241962	10.622935957783978	3.792759276253149	3.471621543487472	3.264552144392918	3.43357082030988	1.37842573002292	5.972007e-07	9.975979e-06	P80022	Extracellular ribonuclease LE	NP_001234195.1	ribonuclease T2 precursor	PF00445	Ribonuclease T2 family	IPR001568;IPR018188;IPR033130;IPR033697;IPR036430	Ribonuclease T2-like;Ribonuclease T2, His active site 1;Ribonuclease T2, His active site 2;Ribonuclease T2, eukaryotic;Ribonuclease T2-like superfamily	KOG1642	Ribonuclease, T2 family	GO:0004519;GO:0004521;GO:0033897;GO:0005576;GO:0016829;GO:0006401;GO:0003723	molecular_function;molecular_function;molecular_function;cellular_component;molecular_function;biological_process;molecular_function	Catalysis of the hydrolysis of ester linkages within nucleic acids by creating internal breaks.;Catalysis of the hydrolysis of ester linkages within ribonucleic acid by creating internal breaks.;Catalysis of the two-stage endonucleolytic cleavage to nucleoside 3'-phosphates and 3'-phosphooligonucleotides with 2',3'-cyclic phosphate intermediates.;The space external to the outermost structure of a…	K01166	-	-
Solyc08g048290.4	Solyc08g048290.4	12.750288269435108	13.003296184676142	13.005730843115328	4.296292936864503	4.134869392331692	4.590340747877687	3.90617850783705	1.32376764553959	5.986017e-07	9.977605e-06	A0A3Q7II34	Major facilitator superfamily (MFS) profile domain-containing protein	XP_004245014.1	probable inositol transporter 2 isoform X1	PF00083	Sugar (and other) transporter	IPR003663;IPR005828;IPR005829;IPR020846;IPR036259	Sugar/inositol transporter;Major facilitator, sugar transporter-like;Sugar transporter, conserved site;Major facilitator superfamily domain;MFS transporter superfamily	-	-	GO:0005366;GO:0016020;GO:0022857;GO:0015798;GO:0055085	molecular_function;cellular_component;molecular_function;biological_process;biological_process	Enables the transfer of a solute or solutes from one side of a membrane to the other according to the reaction: myo-inositol(out) + H+(out) = myo-inositol(in) + H+(in).;A lipid bilayer along with all the proteins and protein complexes embedded in it and attached to it.;Enables the transfer of a substance, usually a specific substance or a group of related substances, from one side of a membrane t…	K08150	-	-
Solyc09g082210.4	Solyc09g082210.4	202.5833068295253	210.44638335967437	232.2792503962289	53.72609523225452	46.98118498199858	59.63052861310784	7.27450043884548	1.75670076116986	6.215506e-07	1.027652e-05	A0A3Q7I7I3	FLZ-type domain-containing protein	-	-	PF03092;PF04570	BT1 family;zinc-finger of the FCS-type, C2-C2	IPR004324;IPR007650;IPR036259;IPR039309	Folate-biopterin transporter;Zf-FLZ domain;MFS transporter superfamily;Biopterin transporter family	-	-	GO:0016020	cellular_component	A lipid bilayer along with all the proteins and protein complexes embedded in it and attached to it.	-	-	-
Solyc08g081140.4	Solyc08g081140.4	16.38511788937828	19.26389208649395	17.716883459829393	5.40074938415771	5.2169380357281705	5.5096497536654825	4.79271684308776	1.47764979738063	6.264246e-07	1.032566e-05	A0A3Q7HRZ6	Transcription factor MYC2	NP_001311412.1	transcription factor MYC2	PF14215;PF00010	bHLH-MYC and R2R3-MYB transcription factors N-terminal;Helix-loop-helix DNA-binding domain	IPR011598;IPR025610;IPR036638;IPR045084	Myc-type, basic helix-loop-helix (bHLH) domain;Transcription factor MYC/MYB N-terminal;Helix-loop-helix DNA-binding domain superfamily;Transcription factor AIB/MYC-like	-	-	GO:0043565;GO:0045893;GO:0005515;GO:0046983;GO:0003677;GO:0003700;GO:0006355;GO:0005634;GO:0006952;GO:0000976	molecular_function;biological_process;molecular_function;molecular_function;molecular_function;molecular_function;biological_process;cellular_component;biological_process;molecular_function	Binding to DNA of a specific nucleotide composition, e.g. GC-rich DNA binding, or with a specific sequence motif or type of DNA e.g. promotor binding or rDNA binding.;Any process that activates or increases the frequency, rate or extent of cellular DNA-templated transcription.;Binding to a protein.;The formation of a protein dimer, a macromolecular structure consists of two noncovalently associat…	K13422	ko04016;ko04075	MAPK signaling pathway - plant;Plant hormone signal transduction
Solyc07g041290.3	Solyc07g041290.3	24.70917367416508	27.85074971167251	24.111546166752515	7.200999178876947	6.273964696561984	5.571278945540935	3.83796410975944	1.75967496805587	6.275433e-07	1.033156e-05	A0A3Q7HBR3	Uncharacterized protein	-	-	-	-	IPR039621	Protein BIG GRAIN 1-like	-	-	GO:0009734;GO:0005886	biological_process;cellular_component	The series of molecular signals generated by the binding of the plant hormone auxin to a receptor, and ending with modulation of a downstream cellular process, e.g. transcription.;The membrane surrounding a cell that separates the cell from its external environment. It consists of a phospholipid bilayer and associated proteins.	-	-	-
Solyc12g014330.1	Solyc12g014330.1	22.67150180845384	18.944069058857437	20.487731293916585	8.050199063309888	8.07918466879347	7.43109355624356	4.29260986079424	1.14389273975219	6.287965e-07	1.034341e-05	A0A3Q7JTF8	Pentacotripeptide-repeat region of PRORP domain-containing protein	-	-	PF01535;PF13041	PPR repeat;PPR repeat family	IPR002885;IPR011990	Pentatricopeptide repeat;Tetratricopeptide-like helical domain superfamily	-	-	GO:0005739;GO:0003729	cellular_component;molecular_function	A semiautonomous, self replicating organelle that occurs in varying numbers, shapes, and sizes in the cytoplasm of virtually all eukaryotic cells. It is notably the site of tissue respiration.;Binding to messenger RNA (mRNA), an intermediate molecule between DNA and protein. mRNA includes UTR and coding sequences, but does not contain introns.	-	-	-
Solyc02g068820.3	Solyc02g068820.3	4.385322607712291	2.739241786895659	3.285630464099238	0.5863781361755932	0.6523565260516466	0.5968013241486664	2.8309285099551	2.24138625272592	6.351691e-07	1.043938e-05	Q8GUQ5	Brassinosteroid LRR receptor kinase	NP_001296180.1	brassinosteroid LRR receptor kinase precursor	PF20141;PF08263;PF00560;PF13855;PF00069	Brassinosteroid receptor island domain;Leucine rich repeat N-terminal domain;Leucine Rich Repeat;Leucine rich repeat;Protein kinase domain	IPR000719;IPR001611;IPR003591;IPR008271;IPR011009;IPR013210;IPR017441;IPR032675;IPR045381	Protein kinase domain;Leucine-rich repeat;Leucine-rich repeat, typical subtype;Serine/threonine-protein kinase, active site;Protein kinase-like domain superfamily;Leucine-rich repeat-containing N-terminal, plant-type;Protein kinase, ATP binding site;Leucine-rich repeat domain superfamily;Brassinosteroid receptor BRI1, island domain	ENOG502QRF2	-	GO:0005886;GO:0050832;GO:0004672;GO:0038023;GO:0009755;GO:0106310;GO:0009742;GO:0001578;GO:0005524;GO:0006952;GO:0009729;GO:0004674;GO:0005496;GO:0009647	cellular_component;biological_process;molecular_function;molecular_function;biological_process;molecular_function;biological_process;biological_process;molecular_function;biological_process;biological_process;molecular_function;molecular_function;biological_process	The membrane surrounding a cell that separates the cell from its external environment. It consists of a phospholipid bilayer and associated proteins.;Reactions triggered in response to the presence of a fungus that act to protect the cell or organism.;Catalysis of the phosphorylation of an amino acid residue in a protein, usually according to the reaction: a protein + ATP = a phosphoprotein + ADP…	K13415	ko04075	Plant hormone signal transduction
Solyc05g012510.3	Solyc05g012510.3	24.80611149198731	24.646191427147507	24.26191589620963	10.157153414904016	10.03157590523518	10.464057195575316	5.75159832609247	1.01348829432436	6.543952e-07	1.070999e-05	A0A3Q7GCI2	Alpha-1,4 glucan phosphorylase	XP_004239069.1	alpha-1,4 glucan phosphorylase L-2 isozyme, chloroplastic/amyloplastic	PF00343	Carbohydrate phosphorylase	IPR000811;IPR011833;IPR035090	Glycosyl transferase, family 35;Glycogen/starch/alpha-glucan phosphorylase;Phosphorylase pyridoxal-phosphate attachment site	-	-	GO:0016757;GO:0005980;GO:0004645;GO:0005737;GO:0005975;GO:0102250;GO:0008184;GO:0102499;GO:0030170	molecular_function;biological_process;molecular_function;cellular_component;biological_process;molecular_function;molecular_function;molecular_function;molecular_function	Catalysis of the transfer of a glycosyl group from one compound (donor) to another (acceptor).;The chemical reactions and pathways resulting in the breakdown of glycogen, a polydisperse, highly branched glucan composed of chains of D-glucose residues.;Catalysis of the reaction: 1,4-alpha-D-glucosyl(n) + phosphate = 1,4-alpha-D-glucosyl(n-1) + alpha-D-glucose 1-phosphate. The name should be qualif…	K00688	ko01100;ko00500;ko04217;ko02026;ko01110;ko04931;ko04922;ko04910	Metabolic pathways;Starch and sucrose metabolism;Necroptosis;Biofilm formation - Escherichia coli;Biosynthesis of secondary metabolites;Insulin resistance;Glucagon signaling pathway;Insulin signaling pathway
Solyc11g072710.3	Solyc11g072710.3	96.17392981364584	95.26637157661764	96.94188951048712	35.0059842923765	37.049261611806486	37.85389386521522	7.80855373702671	1.14002253116344	6.549666e-07	1.071031e-05	A3EX92	Phototropin-1	NP_001234214.2	phototropin-1	PF13426;PF00069	PAS domain;Protein kinase domain	IPR000014;IPR000700;IPR000719;IPR001610;IPR008271;IPR011009;IPR017441;IPR035965	PAS domain;PAS-associated, C-terminal;Protein kinase domain;PAC motif;Serine/threonine-protein kinase, active site;Protein kinase-like domain superfamily;Protein kinase, ATP binding site;PAS domain superfamily	-	-	GO:0009881;GO:0016301;GO:0004674;GO:0005524;GO:0009882;GO:0004672;GO:0005737;GO:0005634;GO:0005886;GO:0009785	molecular_function;molecular_function;molecular_function;molecular_function;molecular_function;molecular_function;cellular_component;cellular_component;cellular_component;biological_process	The function of absorbing and responding to incidental electromagnetic radiation, particularly visible light. The response may involve a change in conformation.;Catalysis of the transfer of a phosphate group, usually from ATP, to a substrate molecule.;Catalysis of the reactions: ATP + protein serine = ADP + protein serine phosphate, and ATP + protein threonine = ADP + protein threonine phosphate.…	K20715	-	-
Solyc08g066720.3	Solyc08g066720.3	2.700839820935511	2.3750336144971764	2.4364681985492425	0.3699633864606201	0.4628816975638032	0.4133925056829773	0.97659375016643	2.31973862809224	6.571516e-07	1.072794e-05	O24023	9-cis-epoxycarotenoid dioxygenase NCED1, chloroplastic	NP_001234455.1	9-cis-epoxycarotenoid dioxygenase	PF03055	Retinal pigment epithelial membrane protein	IPR004294	Carotenoid oxygenase	KOG1285	Beta, beta-carotene 15,15'-dioxygenase and related enzymes	GO:0016702;GO:0009688;GO:0009737;GO:0009739;GO:0009733;GO:0009835;GO:0009738;GO:0045549;GO:0016123;GO:0009555;GO:1901177;GO:0009751;GO:0009507;GO:0048653;GO:1901812;GO:0046872;GO:0051213;GO:0010436;GO:0009856;GO:0009651;GO:0009570;GO:0016121;GO:0009414	molecular_function;biological_process;biological_process;biological_process;biological_process;biological_process;biological_process;molecular_function;biological_process;biological_process;biological_process;biological_process;cellular_component;biological_process;biological_process;molecular_function;molecular_function;molecular_function;biological_process;biological_process;cellular_component;…	Catalysis of an oxidation-reduction (redox) reaction in which hydrogen or electrons are transferred from one donor, and two oxygen atoms is incorporated into a donor.;The chemical reactions and pathways resulting in the formation of abscisic acid, 5-(1-hydroxy-2,6,6,trimethyl-4-oxocyclohex-2-en-1-y1)-3-methylpenta-2,4-dienoic acid.;Any process that results in a change in state or activity of a ce…	K09840	ko01110;ko00906;ko01100	Biosynthesis of secondary metabolites;Carotenoid biosynthesis;Metabolic pathways
Solyc08g081150.4	Solyc08g081150.4	13.11173862880988	12.36038999372724	11.752979067299403	4.476556976173503	5.182778250431452	4.38776256031932	3.96751275258174	1.15097068847549	6.626723e-07	1.076338e-05	A0A3Q7HTS1	GMPS ATP-PPase domain-containing protein	-	-	PF00117;PF07722	Glutamine amidotransferase class-I;Peptidase C26	IPR004739;IPR014729;IPR017926;IPR025777;IPR029062	GMP synthase, glutamine amidotransferase;Rossmann-like alpha/beta/alpha sandwich fold;Glutamine amidotransferase;GMP synthetase ATP pyrophosphatase domain;Class I glutamine amidotransferase-like	-	-	GO:0006541;GO:0016874;GO:0003922;GO:0005524;GO:0006177;GO:0003921	biological_process;molecular_function;molecular_function;molecular_function;biological_process;molecular_function	The chemical reactions and pathways involving glutamine, 2-amino-4-carbamoylbutanoic acid.;Catalysis of the joining of two molecules, or two groups within a single molecule, using the energy from the hydrolysis of ATP, a similar triphosphate, or a pH gradient.;Catalysis of the reaction: ATP + XMP + L-glutamine + H2O = AMP + diphosphate + GMP + L-glutamate + 2H+.;Binding to ATP, adenosine 5'-triph…	-	-	-
Solyc09g082580.4	Solyc09g082580.4	19.36395393245548	17.858109469464818	15.814804092588409	6.618713075201315	6.649894441832349	6.367639470205738	4.39612572038915	1.17801260810839	6.634099e-07	1.076338e-05	A0A3Q7J293	PH domain-containing protein	XP_010326689.1	VAN3-binding protein isoform X2	PF05703;PF08458	Auxin canalisation;Plant pleckstrin homology-like region	IPR008546;IPR013666;IPR040269	VAN3-binding protein-like, auxin canalisation domain;Pleckstrin-like, plant;VAN3-binding protein	-	-	GO:0009734;GO:0010087;GO:0010305;GO:0016020	biological_process;biological_process;biological_process;cellular_component	The series of molecular signals generated by the binding of the plant hormone auxin to a receptor, and ending with modulation of a downstream cellular process, e.g. transcription.;The process whose specific outcome is the progression of phloem and/or xylem over time, from formation to the mature structure. An example of this process is found in Arabidopsis thaliana.;Vascular tissue pattern format…	-	-	-
Solyc12g099280.2	Solyc12g099280.2	5.25714050945411	5.890550980661838	5.581984751895273	1.730854046100872	1.5799853552362162	1.6116957273674275	3.6833991660672	1.51678422357603	6.638519e-07	1.076338e-05	A0A3Q7JYT7	Pre-mRNA polyadenylation factor Fip1 domain-containing protein	XP_004253153.1	FIP1	PF05182	Fip1 motif	IPR007854;IPR044976	Pre-mRNA polyadenylation factor Fip1 domain;FIPS5-like	-	-	GO:0006397;GO:0005634	biological_process;cellular_component	Any process involved in the conversion of a primary mRNA transcript into one or more mature mRNA(s) prior to translation into polypeptide.;A membrane-bounded organelle of eukaryotic cells in which chromosomes are housed and replicated. In most cells, the nucleus contains all of the cell's chromosomes except the organellar chromosomes, and is the site of RNA synthesis and processing. In some speci…	K14405	ko03015	mRNA surveillance pathway
Solyc05g024190.3	Solyc05g024190.3	22.23295410858034	27.238093253762525	25.71374378456859	2.3404052632085803	1.860275057632565	3.5740244657201763	2.80653846799999	3.04197914558037	6.638863e-07	1.076338e-05	A0A3Q7GKD6	Uncharacterized protein	-	-	-	-	-	-	-	-	-	-	-	-	-	-
Solyc04g078190.4	Solyc04g078190.4	30.630539623381036	30.32795690451182	25.136682194081608	9.944041127655316	10.719804360633614	9.496878965506673	4.85412207276612	1.25863306629006	6.732768e-07	1.089035e-05	A0A3Q7G8T0	Uncharacterized protein	XP_004238112.1	uncharacterized protein LOC101265729	PF04788	Protein of unknown function (DUF620)	IPR006873	Protein of unknown function DUF620	-	-	-	-	-	-	-	-
Solyc06g082810.3	Solyc06g082810.3	15.767478490643237	15.277237540500648	16.611630220217812	4.797486612333001	3.9971596418085342	4.5093535908281694	3.42392360123207	1.59473365101787	6.750518e-07	1.090996e-05	A0A3Q7H1D1	Exonuclease domain-containing protein	XP_004242463.1;XP_019069985.1	oligoribonuclease;oligoribonuclease	PF00929	Exonuclease	IPR012337;IPR013520;IPR022894;IPR036397	Ribonuclease H-like superfamily;Exonuclease, RNase T/DNA polymerase III;Oligoribonuclease;Ribonuclease H superfamily	-	-	GO:0003676;GO:0000175;GO:0005739	molecular_function;molecular_function;cellular_component	Binding to a nucleic acid.;Catalysis of the sequential cleavage of mononucleotides from a free 3' terminus of an RNA molecule.;A semiautonomous, self replicating organelle that occurs in varying numbers, shapes, and sizes in the cytoplasm of virtually all eukaryotic cells. It is notably the site of tissue respiration.	K13288	ko03008	Ribosome biogenesis in eukaryotes
Solyc06g060670.4	Solyc06g060670.4	4.491813410023296	4.285355168157849	3.748294081489654	1.0038630987341868	1.1406296278770751	1.2463379919190287	2.85249146337052	1.62837250146018	6.783623e-07	1.095434e-05	A0A3Q7GU24	Protein arginine N-methyltransferase	-	-	-	-	IPR025799;IPR029063	Protein arginine N-methyltransferase;S-adenosyl-L-methionine-dependent methyltransferase superfamily	-	-	GO:0042054;GO:0006338;GO:0008168;GO:0016274;GO:0032259	molecular_function;biological_process;molecular_function;molecular_function;biological_process	Catalysis of the reaction: S-adenosyl-L-methionine + histone = S-adenosyl-L-homocysteine + methyl-histone. Histone methylation generally occurs on either an arginine or a lysine residue.;A dynamic process of chromatin reorganization resulting in changes to chromatin structure. These changes allow DNA metabolic processes such as transcriptional regulation, DNA recombination, DNA repair, and DNA re…	-	-	-
Solyc02g085500.4	Solyc02g085500.4	12.89152754028535	11.607406707853048	11.137474638443011	1.494701992044441	2.7501536827283	1.8943961374464653	2.99328248917417	2.26135497794947	6.834199e-07	1.100181e-05	Q8GSM4	Transcription repressor	NP_001234221.1	OVATE family protein	PF04844	Transcriptional repressor, ovate	IPR006458;IPR038933	Ovate protein family, C-terminal;Ovate protein family	-	-	GO:0005634;GO:0045892	cellular_component;biological_process	A membrane-bounded organelle of eukaryotic cells in which chromosomes are housed and replicated. In most cells, the nucleus contains all of the cell's chromosomes except the organellar chromosomes, and is the site of RNA synthesis and processing. In some species, or in specialized cell types, RNA metabolism or DNA replication may be absent.;Any process that stops, prevents, or reduces the frequen…	-	-	-
Solyc05g006170.4	Solyc05g006170.4	12.22350182822927	11.486596306402056	11.246827620647927	3.8977471379218422	3.128245091210996	3.51445322838184	4.35258048234776	1.47798192115491	6.836686e-07	1.100181e-05	A0A3Q7H536	Chloroplast envelope protein 1	XP_004238713.1	NLR family CARD domain-containing protein 3	PF13516	Leucine Rich repeat	IPR001611;IPR027038;IPR032675	Leucine-rich repeat;Ran GTPase-activating protein;Leucine-rich repeat domain superfamily	-	-	GO:0035556;GO:0098542;GO:0005096	biological_process;biological_process;molecular_function	The process in which a signal is passed on to downstream components within the cell, which become activated themselves to further propagate the signal and finally trigger a change in the function or state of the cell.;Reactions triggered in response to the presence of another organism that act to protect the cell or organism from damage caused by that organism.;Binds to and increases the activity…	K22614	-	-
Solyc11g009050.3	Solyc11g009050.3	8.46263838768042	7.409639275965301	7.395161705551057	1.7514984103930882	1.4363776924222538	1.86390726647711	2.18668258302568	1.95841679773338	6.869704e-07	1.101207e-05	A0A3Q7IRQ8	Uncharacterized protein	-	-	PF00646	F-box domain	IPR001810;IPR032675	F-box domain;Leucine-rich repeat domain superfamily	-	-	GO:0019005;GO:0031146;GO:0098542	cellular_component;biological_process;biological_process	A ubiquitin ligase complex in which a cullin from the Cul1 subfamily and a RING domain protein form the catalytic core; substrate specificity is conferred by a Skp1 adaptor and an F-box protein. SCF complexes are involved in targeting proteins for degradation by the proteasome. The best characterized complexes are those from yeast and mammals (with core subunits named Cdc53/Cul1, Rbx1/Hrt1/Roc1).…	-	-	-
Solyc10g084640.1	Solyc10g084640.1	100.12186992196852	77.68345964405292	81.58551042276349	30.362455828381368	34.21888883631226	28.99375749622162	5.30943144390592	1.21407384515169	6.87339e-07	1.101207e-05	A0A3Q7IMH8	N-acetyltransferase domain-containing protein	XP_004249522.1	probable acetyltransferase NATA1-like	PF00583	Acetyltransferase (GNAT) family	IPR000182;IPR016181	GNAT domain;Acyl-CoA N-acyltransferase	-	-	GO:0016740;GO:0008080;GO:0016747	molecular_function;molecular_function;molecular_function	Catalysis of the transfer of a group, e.g. a methyl group, glycosyl group, acyl group, phosphorus-containing, or other groups, from one compound (generally regarded as the donor) to another compound (generally regarded as the acceptor). Transferase is the systematic name for any enzyme of EC class 2.;Catalysis of the transfer of an acetyl group to a nitrogen atom on the acceptor molecule.;Catalys…	K22883	-	-
Solyc03g112430.1	Solyc03g112430.1	21.250609635237115	16.47790569595237	21.54732395424521	3.66608050163786	4.599100772300851	3.1809422486781944	2.76023523095778	2.1106933981146	6.876158e-07	1.101207e-05	A0A3Q7GEP8	LOB domain-containing protein	XP_010319004.1	LOB domain-containing protein 25-like	PF03195	Lateral organ boundaries (LOB) domain	IPR004883	Lateral organ boundaries, LOB	-	-	-	-	-	-	-	-
Solyc01g100120.4	Solyc01g100120.4	0.7750396494074485	0.9125778697735976	0.7991809203332991	0.0710769727741174	0.0941594188139654	0.0661837741849551	0.676502616608722	3.12899689985678	6.944768e-07	1.107588e-05	A0A3Q7ENS5	Kinesin-like protein	-	-	PF00307;PF00225	Calponin homology (CH) domain;Kinesin motor domain	IPR001715;IPR001752;IPR019821;IPR027417;IPR027640;IPR036872;IPR036961	Calponin homology domain;Kinesin motor domain;Kinesin motor domain, conserved site;P-loop containing nucleoside triphosphate hydrolase;Kinesin-like protein;CH domain superfamily;Kinesin motor domain superfamily	-	-	GO:0003777;GO:0005524;GO:0003774;GO:0007017;GO:0008017;GO:0015630;GO:0007018	molecular_function;molecular_function;molecular_function;biological_process;molecular_function;cellular_component;biological_process	A motor activity that generates movement along a microtubule, driven by ATP hydrolysis.;Binding to ATP, adenosine 5'-triphosphate, a universally important coenzyme and enzyme regulator.;Generation of force resulting in movement, for example along a microfilament or microtubule, or in torque resulting in membrane scission or rotation of a flagellum. The energy required is obtained either from the …	-	-	-
Solyc11g044450.3	Solyc11g044450.3	13.29379976608802	13.43038065051182	11.93259787945926	3.773343045050463	3.12421673152851	3.3378937024957898	3.04678546026471	1.6683238196645	6.950269e-07	1.107588e-05	A0A3Q7JMA1	J domain-containing protein	-	-	PF00226;PF01556	DnaJ domain;DnaJ C terminal domain	IPR001623;IPR002939;IPR008971;IPR036869	DnaJ domain;Chaperone DnaJ, C-terminal;HSP40/DnaJ peptide-binding;Chaperone J-domain superfamily	-	-	GO:0006457;GO:0005829;GO:0051085;GO:0051082;GO:0051087	biological_process;cellular_component;biological_process;molecular_function;molecular_function	The process of assisting in the covalent and noncovalent assembly of single chain polypeptides or multisubunit complexes into the correct tertiary structure.;The part of the cytoplasm that does not contain organelles but which does contain other particulate matter, such as protein complexes.;The process of assisting in the correct posttranslational noncovalent assembly of proteins, which is depen…	-	-	-
Solyc04g074530.3	Solyc04g074530.3	33.227184137165715	32.3355857710813	31.37237546796585	13.423396847264485	13.91732369935559	12.274358349361384	4.97994447753205	1.03836286699149	7.031072e-07	1.116794e-05	P28032	Alcohol dehydrogenase 2	NP_001234099.1	alcohol dehydrogenase 2	PF08240;PF00107	Alcohol dehydrogenase GroES-like domain;Zinc-binding dehydrogenase	IPR002328;IPR011032;IPR013149;IPR013154;IPR036291	Alcohol dehydrogenase, zinc-type, conserved site;GroES-like superfamily;Alcohol dehydrogenase-like, C-terminal;Alcohol dehydrogenase-like, N-terminal;NAD(P)-binding domain superfamily	KOG0022	Alcohol dehydrogenase, class III	GO:0016491;GO:0046872;GO:0004022;GO:0004024;GO:0046294;GO:0051903;GO:0008270;GO:0005829;GO:0005737	molecular_function;molecular_function;molecular_function;molecular_function;biological_process;molecular_function;molecular_function;cellular_component;cellular_component	Catalysis of an oxidation-reduction (redox) reaction, a reversible chemical reaction in which the oxidation state of an atom or atoms within a molecule is altered. One substrate acts as a hydrogen or electron donor and becomes oxidized, while the other acts as hydrogen or electron acceptor and becomes reduced.;Binding to a metal ion.;Catalysis of the reaction: an alcohol + NAD+ = an aldehyde or k…	K18857	ko00010;ko01110;ko01100;ko00071;ko00592;ko01120;ko00350	Glycolysis / Gluconeogenesis;Biosynthesis of secondary metabolites;Metabolic pathways;Fatty acid degradation;alpha-Linolenic acid metabolism;Microbial metabolism in diverse environments;Tyrosine metabolism
Solyc02g065600.3	Solyc02g065600.3	33.95300163208579	31.518994484004462	37.0866572574858	9.125289220661372	8.008481714049582	10.22854956849823	4.8945310883962	1.65596208367476	7.102201e-07	1.127169e-05	A0A6G8RR85	Xyloglucan backbone O-acetyltransferase 2	XP_004233405.1	protein trichome birefringence-like 19	PF13839;PF14416	GDSL/SGNH-like Acyl-Esterase family found in Pmr5 and Cas1p;PMR5 N terminal Domain	IPR025846;IPR026057;IPR029962	Trichome birefringence-like, N-terminal domain;Trichome birefringence-like, C-terminal domain;Trichome birefringence-like family	-	-	GO:0016413;GO:0016740;GO:0005794;GO:0016020	molecular_function;molecular_function;cellular_component;cellular_component	Catalysis of the transfer of an acetyl group to an oxygen atom on the acceptor molecule.;Catalysis of the transfer of a group, e.g. a methyl group, glycosyl group, acyl group, phosphorus-containing, or other groups, from one compound (generally regarded as the donor) to another compound (generally regarded as the acceptor). Transferase is the systematic name for any enzyme of EC class 2.;A membra…	-	-	-
Solyc07g053290.3	Solyc07g053290.3	35.177845164612485	35.32808894954491	30.66319187092513	13.03687167796368	13.323059187341244	12.52088870701711	4.90292777457376	1.12602462682749	7.220634e-07	1.142227e-05	A0A3Q7HEZ9	BHLH domain-containing protein	XP_004243409.1	transcription factor bHLH30	PF00010	Helix-loop-helix DNA-binding domain	IPR011598;IPR036638;IPR045847	Myc-type, basic helix-loop-helix (bHLH) domain;Helix-loop-helix DNA-binding domain superfamily;Transcription factor AIG1-like	-	-	GO:0003700;GO:0006355;GO:0080090;GO:0005634;GO:0046983	molecular_function;biological_process;biological_process;cellular_component;molecular_function	A transcription regulator activity that modulates transcription of gene sets via selective and non-covalent binding to a specific double-stranded genomic DNA sequence (sometimes referred to as a motif) within a cis-regulatory region. Regulatory regions include promoters (proximal and distal) and enhancers. Genes are transcriptional units, and include bacterial operons.;Any process that modulates …	-	-	-
Solyc02g093980.3	Solyc02g093980.3	29.20559788762763	30.3225444705289	32.61826022249793	10.67812818095225	9.466719332464052	9.90872057848382	6.29859545656583	1.36521639319197	7.360202e-07	1.161463e-05	A0A3Q7FEA0	C2 NT-type domain-containing protein	XP_019068108.1;XP_004231790.1;XP_010315921.1	uncharacterized protein LOC101246002;uncharacterized protein LOC101246002;uncharacterized protein LOC101246002	PF10358	N-terminal C2 in EEIG1 and EHBP1 proteins	IPR019448;IPR021827	NT-type C2 domain;Nucleoporin Nup186/Nup192/Nup205	-	-	GO:0005643	cellular_component	A protein complex providing a discrete opening in the nuclear envelope of a eukaryotic cell, where the inner and outer nuclear membranes are joined.	-	-	-
Solyc04g077750.2	Solyc04g077750.2	12.124427129200466	10.39858467399915	7.545349486184388	0.485942040176729	0.4768541327069829	0.6033173520439066	0.689179707324336	3.96865040922191	7.414089e-07	1.165226e-05	-	-	-	-	-	-	-	-	-	-	-	-	-	-	-	-
Solyc02g030300.3	Solyc02g030300.3	37.36775917513094	34.07684663825793	39.24864834287316	14.094538078550602	14.854332846242183	15.05813993731504	6.11439772845368	1.07884091243324	7.491494e-07	1.173587e-05	Q8GUQ5	Brassinosteroid LRR receptor kinase	NP_001296180.1	brassinosteroid LRR receptor kinase precursor	PF20141;PF08263;PF00560;PF13855;PF00069	Brassinosteroid receptor island domain;Leucine rich repeat N-terminal domain;Leucine Rich Repeat;Leucine rich repeat;Protein kinase domain	IPR000719;IPR001611;IPR003591;IPR008271;IPR011009;IPR013210;IPR017441;IPR032675;IPR045381	Protein kinase domain;Leucine-rich repeat;Leucine-rich repeat, typical subtype;Serine/threonine-protein kinase, active site;Protein kinase-like domain superfamily;Leucine-rich repeat-containing N-terminal, plant-type;Protein kinase, ATP binding site;Leucine-rich repeat domain superfamily;Brassinosteroid receptor BRI1, island domain	ENOG502QRF2	-	GO:0005886;GO:0050832;GO:0004672;GO:0038023;GO:0009755;GO:0106310;GO:0009742;GO:0001578;GO:0005524;GO:0006952;GO:0009729;GO:0004674;GO:0005496;GO:0009647	cellular_component;biological_process;molecular_function;molecular_function;biological_process;molecular_function;biological_process;biological_process;molecular_function;biological_process;biological_process;molecular_function;molecular_function;biological_process	The membrane surrounding a cell that separates the cell from its external environment. It consists of a phospholipid bilayer and associated proteins.;Reactions triggered in response to the presence of a fungus that act to protect the cell or organism.;Catalysis of the phosphorylation of an amino acid residue in a protein, usually according to the reaction: a protein + ATP = a phosphoprotein + ADP…	K13415	ko04075	Plant hormone signal transduction
Solyc02g063420.3	Solyc02g063420.3	3.4760017421164573	2.714564816330722	3.158350311745764	0	0.0838910048280803	0	0.48128453350541	6.08124836278058	7.557828e-07	1.182069e-05	A0A3Q7F0Z9	Hydroxyproline-rich glycoprotein family protein	XP_004233471.1	uncharacterized protein At5g65660-like	-	-	IPR037699	Uncharacterized protein At5g65660-like	-	-	GO:0016020	cellular_component	A lipid bilayer along with all the proteins and protein complexes embedded in it and attached to it.	-	-	-
Solyc12g096870.1	Solyc12g096870.1	4.017808995181091	3.943522782906304	5.007794084153626	0.6740879772472078	0.7937777212480374	0.659065361986362	1.86430210383234	2.35126398529943	7.567828e-07	1.182679e-05	K4CWS6	UDP-glycosyltransferase 75C1	XP_004247894.1	-	PF00201	UDP-glucoronosyl and UDP-glucosyl transferase	IPR002213;IPR035595	UDP-glucuronosyl/UDP-glucosyltransferase;UDP-glycosyltransferase family, conserved site	KOG1192	UDP-glucuronosyl and UDP-glucosyl transferase	GO:0009845;GO:0080148;GO:0009835;GO:0047215;GO:0008194;GO:0009738;GO:0080044;GO:0080043;GO:0009787;GO:0005634;GO:0009737;GO:0010294;GO:0005737;GO:0016757	biological_process;biological_process;biological_process;molecular_function;molecular_function;biological_process;molecular_function;molecular_function;biological_process;cellular_component;biological_process;molecular_function;cellular_component;molecular_function	The physiological and developmental changes that occur in a seed commencing with water uptake (imbibition) and terminating with the elongation of the embryonic axis.;Any process that stops, prevents, or reduces the frequency, rate or extent of a response to water deprivation. Response to water deprivation is a change in state or activity of a cell or an organism (in terms of movement, secretion, …	-	-	-
Solyc02g081180.2	Solyc02g081180.2	37.92001900490681	31.57504037000544	37.35092542586295	9.73577995961917	11.96187033548628	11.98748202753906	3.79771747145843	1.41128285537923	7.688721e-07	1.19579e-05	A0A3Q7FSL2	RING-type domain-containing protein	XP_010316564.1	uncharacterized protein LOC104645789	PF13920	Zinc finger, C3HC4 type (RING finger)	IPR001841;IPR013083	Zinc finger, RING-type;Zinc finger, RING/FYVE/PHD-type	-	-	-	-	-	-	-	-
Solyc06g053840.3	Solyc06g053840.3	16.188156785811543	15.882554222028276	14.699271016112643	4.5320187440199	5.676674153251624	4.341749298071724	3.48815829813315	1.42662705499055	7.759385e-07	1.200907e-05	Q2LAJ3	Auxin response factor 2A	NP_001233765.1	auxin response factor 2A	PF06507;PF02309;PF02362	Auxin response factor;AUX/IAA family;B3 DNA binding domain	IPR000270;IPR003340;IPR010525;IPR015300;IPR033389;IPR044835	PB1 domain;B3 DNA binding domain;Auxin response factor domain;DNA-binding pseudobarrel domain superfamily;AUX/IAA domain;Auxin response factor	ENOG502QRXI	-	GO:0009911;GO:0009725;GO:0042803;GO:0009835;GO:0009836;GO:0003677;GO:0009734;GO:0006355;GO:0046982;GO:0005634	biological_process;biological_process;molecular_function;biological_process;biological_process;molecular_function;biological_process;biological_process;molecular_function;cellular_component	Any process that activates or increases the frequency, rate or extent of flower development.;Any process that results in a change in state or activity of a cell or an organism (in terms of movement, secretion, enzyme production, gene expression, etc.) as a result of a hormone stimulus.;Binding to an identical protein to form a homodimer.;An developmental maturation process that has as participant…	-	-	-
Solyc01g073750.4	Solyc01g073750.4	21.85906497424056	19.3018095879598	20.39544761210515	7.758933220976755	8.171919367340003	8.918087688402238	6.5882721397441	1.05435284852309	8.143614e-07	1.248516e-05	A0A3Q7E8V3	1,3-beta-glucan synthase	XP_004228593.1	callose synthase 3-like	PF14288;PF02364;PF04652	1,3-beta-glucan synthase subunit FKS1, domain-1;1,3-beta-glucan synthase component;Vta1 like	IPR003440;IPR023175;IPR026899;IPR039431	Glycosyl transferase, family 48;Vta1/Callose synthase, N-terminal domain superfamily;1,3-beta-glucan synthase component FKS1-like, domain-1;Vta1/callose synthase, N-terminal	-	-	GO:0006075;GO:0003843;GO:0000148;GO:0016757;GO:0016020;GO:0071555;GO:0008360;GO:0005886;GO:0046527	biological_process;molecular_function;cellular_component;molecular_function;cellular_component;biological_process;biological_process;cellular_component;molecular_function	The chemical reactions and pathways resulting in the formation of (1->3)-beta-D-glucans, compounds composed of glucose residues linked by (1->3)-beta-D-glucosidic bonds.;Catalysis of the reaction: UDP-glucose + [(1->3)-beta-D-glucosyl](n) = UDP + [(1->3)-beta-D-glucosyl](n+1).;A protein complex that catalyzes the transfer of a glucose group from UDP-glucose to a (1->3)-beta-D-glucan chain.;Cataly…	K11000	-	-
Solyc03g095940.1	Solyc03g095940.1	12.240848240180442	11.926692099210497	15.803797135814042	1.7277939206283697	1.554191247341278	2.0557480143718294	1.93373291412137	2.66688738755297	8.242942e-07	1.260754e-05	A0A3Q7FPI4	LOB domain-containing protein	XP_004235237.1	LOB domain-containing protein 21	PF03195	Lateral organ boundaries (LOB) domain	IPR004883	Lateral organ boundaries, LOB	-	-	-	-	-	-	-	-
Solyc05g006340.3	Solyc05g006340.3	89.23904950987279	72.94256463403511	86.0737516621473	27.18330321715884	33.72659229509389	30.275561666203316	6.5103065355646	1.19236838540747	8.372289e-07	1.277515e-05	A0A3Q7GDN5	Uncharacterized protein	XP_004238721.1	protein JINGUBANG	PF00400	WD domain, G-beta repeat	IPR001680;IPR015943;IPR020472;IPR036322;IPR045182	WD40 repeat;WD40/YVTN repeat-like-containing domain superfamily;G-protein beta WD-40 repeat;WD40-repeat-containing domain superfamily;Protein JINGUBANG-like	-	-	-	-	-	-	-	-
Solyc08g007000.3	Solyc08g007000.3	30.932808646776333	33.84541537433143	33.739853807088096	11.202727703521068	10.193198274210197	11.378184513887652	5.76034764630438	1.33749679913778	8.486259e-07	1.287813e-05	A0A3Q7HHL4	PPM-type phosphatase domain-containing protein	XP_004244702.1	protein phosphatase 2C 29	PF00481	Protein phosphatase 2C	IPR001932;IPR015655;IPR036457	PPM-type phosphatase-like domain;Protein phosphatase 2C;PPM-type phosphatase-like domain superfamily	-	-	GO:0004722	molecular_function	Catalysis of the reaction: protein serine phosphate + H2O = protein serine + phosphate, and protein threonine phosphate + H2O = protein threonine + phosphate.	-	-	-
Solyc12g056700.2	Solyc12g056700.2	48.68441149662228	39.03490904470635	45.03373437493988	16.519939292717705	18.27633194215882	17.157567018126066	4.79559376031559	1.09887620165506	8.562484e-07	1.296834e-05	A0A3Q7JC49	Uncharacterized protein	XP_004252564.1	secoisolariciresinol dehydrogenase-like	PF13561	Enoyl-(Acyl carrier protein) reductase	IPR002347;IPR020904;IPR036291	Short-chain dehydrogenase/reductase SDR;Short-chain dehydrogenase/reductase, conserved site;NAD(P)-binding domain superfamily	-	-	GO:0016491	molecular_function	Catalysis of an oxidation-reduction (redox) reaction, a reversible chemical reaction in which the oxidation state of an atom or atoms within a molecule is altered. One substrate acts as a hydrogen or electron donor and becomes oxidized, while the other acts as hydrogen or electron acceptor and becomes reduced.	-	-	-
Solyc06g053830.3	Solyc06g053830.3	5.703279492233074	4.929770583890319	6.054355071926175	0.9257696163796592	0.9733459467967066	1.2314803604835336	1.86805085457831	2.16663421878591	8.686367e-07	1.310416e-05	G9HPV6	Auxin-responsive protein	NP_001266039.1	IAA7 protein	PF02309	AUX/IAA family	IPR000270;IPR003311;IPR033389	PB1 domain;AUX/IAA protein;AUX/IAA domain	ENOG502QPNB	-	GO:0009734;GO:0006355;GO:0005634	biological_process;biological_process;cellular_component	The series of molecular signals generated by the binding of the plant hormone auxin to a receptor, and ending with modulation of a downstream cellular process, e.g. transcription.;Any process that modulates the frequency, rate or extent of cellular DNA-templated transcription.;A membrane-bounded organelle of eukaryotic cells in which chromosomes are housed and replicated. In most cells, the nucle…	K14484	ko04075	Plant hormone signal transduction
Solyc02g076680.3	Solyc02g076680.3	6.921091509131617	6.564385092913521	6.476942908848805	2.4084978366600893	2.047056996322435	2.1558743119423154	3.76885931618927	1.34371454563923	8.710641e-07	1.311601e-05	A0A3Q7F3L3	Uncharacterized protein	XP_004233042.1	uncharacterized protein LOC101247686	PF05097	Protein of unknown function (DUF688)	IPR007789	Protein of unknown function DUF688	-	-	-	-	-	-	-	-
Solyc09g150125.1	Solyc09g150125.1	40.01009879257884	41.61899032336702	44.841870636330135	13.05368714049544	14.077835392882273	13.599184827698345	3.37302662410241	1.38484154731755	8.742849e-07	1.315429e-05	A0A3Q7I0Z7	Uncharacterized protein	-	-	-	-	-	-	-	-	-	-	-	-	-	-
Solyc06g008220.4	Solyc06g008220.4	26.642017328695957	27.216509825899657	25.67084419691224	9.985480968721015	10.519231523890026	8.9334147873221	4.15103018023282	1.18135041531341	8.776433e-07	1.317416e-05	A0A3Q7HJD4	DAG protein, chloroplastic	XP_004240482.1	multiple organellar RNA editing factor 2, chloroplastic	-	-	IPR037045;IPR039206	Peptidase S8 propeptide/proteinase inhibitor I9 superfamily;MORF/ORRM1/DAG-like	-	-	GO:0016554;GO:0080156;GO:0005739	biological_process;biological_process;cellular_component	The conversion of a cytosine residue to uridine in an RNA molecule by deamination.;The covalent alteration within the mitochondrion of one or more nucleotides within an mRNA to produce an mRNA molecule with a sequence that differs from that coded genetically.;A semiautonomous, self replicating organelle that occurs in varying numbers, shapes, and sizes in the cytoplasm of virtually all eukaryotic…	-	-	-
Solyc03g123490.1	Solyc03g123490.1	13.986336511643788	13.891626046590003	13.940304824257163	5.597125516824852	6.094151155327216	5.836434017814275	4.50135449320662	1.00285237570356	8.956014e-07	1.3361e-05	O82777	Subtilisin-like protease SBT3	NP_001234774.1	subtilisin-like protease precursor	PF17766;PF05922;PF00082	Fibronectin type-III domain;Peptidase inhibitor I9;Subtilase family	IPR000209;IPR010259;IPR015500;IPR023828;IPR034197;IPR036852;IPR037045;IPR041469;IPR045051	Peptidase S8/S53 domain;Peptidase S8 propeptide/proteinase inhibitor I9;Peptidase S8, subtilisin-related;Peptidase S8, subtilisin, Ser-active site;Cucumisin-like catalytic domain;Peptidase S8/S53 domain superfamily;Peptidase S8 propeptide/proteinase inhibitor I9 superfamily;Subtilisin-like protease, fibronectin type-III domain;Subtilisin-like protease	ENOG502QT5U	-	GO:1900367;GO:0005615;GO:0043171;GO:0008236;GO:1902066;GO:0042802;GO:0042803;GO:0010628;GO:0097264;GO:0005576;GO:0009827;GO:0006508;GO:0006952;GO:0004252;GO:0009611	biological_process;cellular_component;biological_process;molecular_function;biological_process;molecular_function;molecular_function;biological_process;biological_process;cellular_component;biological_process;biological_process;biological_process;molecular_function;biological_process	Any process that activates or increases the frequency, rate or extent of defense response to insect.;That part of a multicellular organism outside the cells proper, usually taken to be outside the plasma membranes, and occupied by fluid.;The chemical reactions and pathways resulting in the breakdown of peptides, compounds of 2 or more (but usually less than 100) amino acids where the alpha carbox…	-	-	-
Solyc10g076710.3	Solyc10g076710.3	13.001149373110904	12.652057359650652	12.308318162544271	4.773471469491134	4.370425631859919	4.827658143535007	4.18087028825042	1.19032217628077	9.180322e-07	1.362228e-05	B6C9K5	Phosphoinositide phospholipase C	NP_001234203.1	PI-phospholipase C PLC1	PF00168;PF09279;PF00388;PF00387	C2 domain;Phosphoinositide-specific phospholipase C, efhand-like;Phosphatidylinositol-specific phospholipase C, X domain;Phosphatidylinositol-specific phospholipase C, Y domain	IPR000008;IPR000909;IPR001192;IPR001711;IPR011992;IPR015359;IPR017946;IPR035892	C2 domain;Phosphatidylinositol-specific phospholipase C, X domain;Phosphoinositide phospholipase C family;Phospholipase C, phosphatidylinositol-specific, Y domain;EF-hand domain pair;Phosphoinositide-specific phospholipase C, EF-hand-like domain;PLC-like phosphodiesterase, TIM beta/alpha-barrel domain superfamily;C2 domain superfamily	KOG0169	Phosphoinositide-specific phospholipase C	GO:0016787;GO:0035556;GO:0006629;GO:0007165;GO:0016042;GO:0005886;GO:0004435	molecular_function;biological_process;biological_process;biological_process;biological_process;cellular_component;molecular_function	Catalysis of the hydrolysis of various bonds, e.g. C-O, C-N, C-C, phosphoric anhydride bonds, etc.;The process in which a signal is passed on to downstream components within the cell, which become activated themselves to further propagate the signal and finally trigger a change in the function or state of the cell.;The chemical reactions and pathways involving lipids, compounds soluble in an orga…	K05857	ko04070;ko04919;ko00562;ko04933;ko04020;ko01100	Phosphatidylinositol signaling system;Thyroid hormone signaling pathway;Inositol phosphate metabolism;AGE-RAGE signaling pathway in diabetic complications;Calcium signaling pathway;Metabolic pathways
Solyc07g065260.4	Solyc07g065260.4	11.85609401547912	10.805418913094355	11.90069421016162	4.359509385512086	4.2558137641959	4.522112629540107	4.07709573243731	1.14424158556141	9.320401e-07	1.377125e-05	D8VNC6	WRKY transcription factor 72B	NP_001234773.1	-	PF03106	WRKY DNA -binding domain	IPR003657;IPR036576;IPR044810	WRKY domain;WRKY domain superfamily;WRKY transcription factor, plant	-	-	GO:0043565;GO:0003677;GO:0003700;GO:0006355;GO:0005634;GO:0006952	molecular_function;molecular_function;molecular_function;biological_process;cellular_component;biological_process	Binding to DNA of a specific nucleotide composition, e.g. GC-rich DNA binding, or with a specific sequence motif or type of DNA e.g. promotor binding or rDNA binding.;Any molecular function by which a gene product interacts selectively and non-covalently with DNA (deoxyribonucleic acid).;A transcription regulator activity that modulates transcription of gene sets via selective and non-covalent bi…	-	-	-
Solyc05g047460.3	Solyc05g047460.3	10.214717156019589	10.163658671518036	10.655274008650713	4.076417805118888	4.481799177184067	4.261522464310134	4.80831421144766	1.02470117911056	9.354219e-07	1.378539e-05	Q2LAJ3	Auxin response factor 2A	NP_001233765.1	auxin response factor 2A	PF06507;PF02309;PF02362	Auxin response factor;AUX/IAA family;B3 DNA binding domain	IPR000270;IPR003340;IPR010525;IPR015300;IPR033389;IPR044835	PB1 domain;B3 DNA binding domain;Auxin response factor domain;DNA-binding pseudobarrel domain superfamily;AUX/IAA domain;Auxin response factor	ENOG502QRXI	-	GO:0009911;GO:0009725;GO:0042803;GO:0009835;GO:0009836;GO:0003677;GO:0009734;GO:0006355;GO:0046982;GO:0005634	biological_process;biological_process;molecular_function;biological_process;biological_process;molecular_function;biological_process;biological_process;molecular_function;cellular_component	Any process that activates or increases the frequency, rate or extent of flower development.;Any process that results in a change in state or activity of a cell or an organism (in terms of movement, secretion, enzyme production, gene expression, etc.) as a result of a hormone stimulus.;Binding to an identical protein to form a homodimer.;An developmental maturation process that has as participant…	-	-	-
Solyc07g054800.1	Solyc07g054800.1	7.222860762839391	8.7000959330848	6.120529796675021	0.1954052648329703	0.143813151133852	0.1819528522037178	-0.013002	5.01411643552732	9.393968e-07	1.382296e-05	A0A3Q7HD22	Wound induced protein	XP_004243307.1	uncharacterized protein LOC101253915	PF12609	Wound-induced protein	IPR022251	Protein of unknown function wound-induced	-	-	-	-	-	-	-	-
Solyc09g066010.3	Solyc09g066010.3	32.31737827685146	28.28996996424176	27.987071131140095	12.333950577979628	12.75441174228316	11.048703314539011	4.99180883333145	1.03876428786738	9.449259e-07	1.387274e-05	A0A3Q7GFB5	WRKY transcription factor 72A	NP_001234802.2	WRKY transcription factor 72a	PF03106	WRKY DNA -binding domain	IPR003657;IPR036576;IPR044810	WRKY domain;WRKY domain superfamily;WRKY transcription factor, plant	-	-	GO:0043565;GO:0003677;GO:0003700;GO:0006355;GO:0005634;GO:0006952	molecular_function;molecular_function;molecular_function;biological_process;cellular_component;biological_process	Binding to DNA of a specific nucleotide composition, e.g. GC-rich DNA binding, or with a specific sequence motif or type of DNA e.g. promotor binding or rDNA binding.;Any molecular function by which a gene product interacts selectively and non-covalently with DNA (deoxyribonucleic acid).;A transcription regulator activity that modulates transcription of gene sets via selective and non-covalent bi…	-	-	-
Solyc05g052100.3	Solyc05g052100.3	5.665984775184785	5.756552597885066	4.873338960687545	0.6989205085380567	0.9352493957607924	1.183280484008694	2.26653974018558	2.27145153720355	9.459369e-07	1.387708e-05	P93541	Glutamate dehydrogenase	NP_001233850.2	glutamate dehydrogenase	PF00208;PF02812	Glutamate/Leucine/Phenylalanine/Valine dehydrogenase;Glu/Leu/Phe/Val dehydrogenase, dimerisation domain	IPR006095;IPR006096;IPR006097;IPR014362;IPR033524;IPR033922;IPR036291;IPR046346	Glutamate/phenylalanine/leucine/valine/L-tryptophan dehydrogenase;Glutamate/phenylalanine/leucine/valine/L-tryptophan dehydrogenase, C-terminal;Glutamate/phenylalanine/leucine/valine/L-tryptophan dehydrogenase, dimerisation domain;Glutamate dehydrogenase;Leu/Phe/Val dehydrogenases active site;NAD(P) binding domain of glutamate dehydrogenase;NAD(P)-binding domain superfamily;Aminoacid dehydrogenas…	KOG2250	Glutamate/leucine/phenylalanine/valine dehydrogenases	GO:0016491;GO:0005759;GO:0016639;GO:0004352;GO:0004354;GO:0006520;GO:0006538;GO:0005739;GO:0004353	molecular_function;cellular_component;molecular_function;molecular_function;molecular_function;biological_process;biological_process;cellular_component;molecular_function	Catalysis of an oxidation-reduction (redox) reaction, a reversible chemical reaction in which the oxidation state of an atom or atoms within a molecule is altered. One substrate acts as a hydrogen or electron donor and becomes oxidized, while the other acts as hydrogen or electron acceptor and becomes reduced.;The gel-like material, with considerable fine structure, that lies in the matrix space,…	K00261	ko01200;ko00220;ko01100;ko00471;ko04964;ko01120;ko04217;ko00910;ko00250	Carbon metabolism;Arginine biosynthesis;Metabolic pathways;D-Glutamine and D-glutamate metabolism;Proximal tubule bicarbonate reclamation;Microbial metabolism in diverse environments;Necroptosis;Nitrogen metabolism;Alanine, aspartate and glutamate metabolism
Solyc12g099430.2	Solyc12g099430.2	3.2860047866104485	2.5880172926426543	2.9386821001787085	0.4895868173837061	0.6447886336550728	0.6718259158291121	1.74643629752797	2.02385997532545	9.546375e-07	1.396247e-05	A0A3Q7JEP7	AB hydrolase-1 domain-containing protein	XP_004252913.1	uncharacterized protein LOC101263888	PF00561	alpha/beta hydrolase fold	IPR000073;IPR000639;IPR029058	Alpha/beta hydrolase fold-1;Epoxide hydrolase-like;Alpha/Beta hydrolase fold	-	-	GO:0004301;GO:0003824;GO:0016787	molecular_function;molecular_function;molecular_function	Catalysis of the reaction: an epoxide + H2O = an ethanediol.;Catalysis of a biochemical reaction at physiological temperatures. In biologically catalyzed reactions, the reactants are known as substrates, and the catalysts are naturally occurring macromolecular substances known as enzymes. Enzymes possess specific binding sites for substrates, and are usually composed wholly or largely of protein,…	-	-	-
Solyc02g069830.4	Solyc02g069830.4	6.76277	6.465961644156824	6.667983266860622	2.451370408100824	2.791814602534488	2.48254567388997	3.63036383475937	1.11155423210444	9.617177e-07	1.404484e-05	A0A3Q7F1K3	Uncharacterized protein	-	-	PF00046;PF08670;PF01852	Homeodomain;MEKHLA domain;START domain	IPR001356;IPR002913;IPR009057;IPR013978;IPR023393;IPR044830	Homeobox domain;START domain;Homeobox-like domain superfamily;MEKHLA;START-like domain superfamily;Class III homeodomain-leucine zipper family	-	-	GO:0003700;GO:0006355;GO:0008289;GO:0005634;GO:0003677;GO:0030154	molecular_function;biological_process;molecular_function;cellular_component;molecular_function;biological_process	A transcription regulator activity that modulates transcription of gene sets via selective and non-covalent binding to a specific double-stranded genomic DNA sequence (sometimes referred to as a motif) within a cis-regulatory region. Regulatory regions include promoters (proximal and distal) and enhancers. Genes are transcriptional units, and include bacterial operons.;Any process that modulates …	-	-	-
Solyc04g009130.4	Solyc04g009130.4	0.9943038402314897	0.7645806792392332	0.8811045465650416	0.0843909627042134	0.0621095357081931	0.0589358852896361	0.212678636117384	3.41389366212094	9.645318e-07	1.405419e-05	Q71BG9	ToMV resistance protein Tm-2(2)	-	-	PF00931;PF18052	NB-ARC domain;Rx N-terminal domain	IPR002182;IPR003593;IPR027417;IPR032675;IPR036388;IPR038005;IPR041118;IPR042197;IPR044974	NB-ARC;AAA+ ATPase domain;P-loop containing nucleoside triphosphate hydrolase;Leucine-rich repeat domain superfamily;Winged helix-like DNA-binding domain superfamily;Virus X resistance protein-like, coiled-coil domain;Disease resistance, N-terminal;Apoptotic protease-activating factors, helical domain;Disease resistance protein, plants	-	-	GO:0005886;GO:0005515;GO:0051607;GO:0043531;GO:0016887;GO:0006952;GO:0098542;GO:0009626;GO:0005524	cellular_component;molecular_function;biological_process;molecular_function;molecular_function;biological_process;biological_process;biological_process;molecular_function	The membrane surrounding a cell that separates the cell from its external environment. It consists of a phospholipid bilayer and associated proteins.;Binding to a protein.;Reactions triggered in response to the presence of a virus that act to protect the cell or organism.;Binding to ADP, adenosine 5'-diphosphate.;Catalysis of the reaction: ATP + H2O = ADP + H+ phosphate. ATP hydrolysis is used in…	-	-	-
Solyc05g046290.3	Solyc05g046290.3	7.820289346539575	6.046653094921342	7.512140011752039	1.2372393652740838	1.7483054031307277	1.3824759423719668	2.07412338196694	2.02396443815458	9.884201e-07	1.432137e-05	Q40144	Probable xyloglucan endotransglucosylase/hydrolase 1	NP_001233858.1	probable xyloglucan endotransglucosylase/hydrolase 1 precursor	PF00722;PF06955	Glycosyl hydrolases family 16;Xyloglucan endo-transglycosylase (XET) C-terminus	IPR000757;IPR008263;IPR008264;IPR010713;IPR013320;IPR016455;IPR044791	Glycoside hydrolase family 16;Glycoside hydrolase, family 16, active site;Beta-glucanase;Xyloglucan endo-transglycosylase, C-terminal;Concanavalin A-like lectin/glucanase domain superfamily;Xyloglucan endotransglucosylase/hydrolase;Beta-glucanase/XTH	ENOG502QQ71	-	GO:0042546;GO:0016740;GO:0016798;GO:0048046;GO:0030247;GO:0016762;GO:0004553;GO:0071555;GO:0010411	biological_process;molecular_function;molecular_function;cellular_component;molecular_function;molecular_function;molecular_function;biological_process;biological_process	A cellular process that results in the biosynthesis of constituent macromolecules, assembly, and arrangement of constituent parts of a cell wall. Includes biosynthesis of constituent macromolecules, such as proteins and polysaccharides, and those macromolecular modifications that are involved in synthesis or assembly of the cellular component. A cell wall is the rigid or semi-rigid envelope lying…	K08235	-	-
Solyc07g014590.4	Solyc07g014590.4	5.1449272016707726	5.087680267518562	5.337423742287919	1.7851596556097498	1.9512337088512584	1.843301256495956	3.26498926917627	1.22877374984363	9.887754e-07	1.432137e-05	A0A3Q7I1R5	Glycosyl hydrolase family 13 catalytic domain-containing protein	XP_004242868.1	isoamylase 1, chloroplastic isoform X2	PF00128;PF02922;PF21156	Alpha amylase, catalytic domain;Carbohydrate-binding module 48 (Isoamylase N-terminal domain);Isoamylase 1-3, C-terminal	IPR004193;IPR006047;IPR013780;IPR013783;IPR014756;IPR017853;IPR044505;IPR048650	Glycoside hydrolase, family 13, N-terminal;Glycosyl hydrolase, family 13, catalytic domain;Glycosyl hydrolase, all-beta;Immunoglobulin-like fold;Immunoglobulin E-set;Glycoside hydrolase superfamily;Glycogen debranching enzyme GlgX/isoamylase, N-terminal Early set domain;Isoamylase 1-3-like, C-terminal	-	-	GO:0019156;GO:0009507;GO:0004553;GO:0005975	molecular_function;cellular_component;molecular_function;biological_process	Catalysis of the hydrolysis of alpha-(1,6)-D-glucosidic branch linkages in glycogen, amylopectin and their beta-limits dextrins.;A chlorophyll-containing plastid with thylakoids organized into grana and frets, or stroma thylakoids, and embedded in a stroma.;Catalysis of the hydrolysis of any O-glycosyl bond.;The chemical reactions and pathways involving carbohydrates, any of a group of organic co…	K01214	ko01100;ko00500;ko01110	Metabolic pathways;Starch and sucrose metabolism;Biosynthesis of secondary metabolites
Solyc04g016480.3	Solyc04g016480.3	23.63015921147876	23.197416132964417	25.76404391604416	8.552579907110431	7.544892055274931	8.205115987797129	4.74010909494386	1.32864992351097	9.953234e-07	1.437527e-05	A0A3Q7G2A6	Calcineurin-like phosphoesterase domain-containing protein	-	-	PF13178;PF00612;PF00149	Protein of unknown function (DUF4005);IQ calmodulin-binding motif;Calcineurin-like phosphoesterase	IPR000048;IPR004843;IPR025064;IPR029052	IQ motif, EF-hand binding site;Calcineurin-like phosphoesterase domain, ApaH type;Domain of unknown function DUF4005;Metallo-dependent phosphatase-like	-	-	GO:0005516;GO:0016787	molecular_function;molecular_function	Binding to calmodulin, a calcium-binding protein with many roles, both in the calcium-bound and calcium-free states.;Catalysis of the hydrolysis of various bonds, e.g. C-O, C-N, C-C, phosphoric anhydride bonds, etc.	-	-	-
Solyc02g087980.3	Solyc02g087980.3	7.8852151839194	8.538612440012816	8.143714518232525	2.715604257238568	2.3194918451024207	2.145874518021079	4.33596990450814	1.52515169559523	9.977548e-07	1.439766e-05	A0A3Q7F8Y3	Structural maintenance of chromosomes protein	XP_004233681.1	structural maintenance of chromosomes protein 4	PF06470;PF02463	SMC proteins Flexible Hinge Domain;RecF/RecN/SMC N terminal domain	IPR003395;IPR010935;IPR024704;IPR027417;IPR036277	RecF/RecN/SMC, N-terminal;SMCs flexible hinge;Structural maintenance of chromosomes protein;P-loop containing nucleoside triphosphate hydrolase;SMCs flexible hinge superfamily	-	-	GO:0016887;GO:0005524;GO:0051321;GO:0005634;GO:0005694;GO:0051276	molecular_function;molecular_function;biological_process;cellular_component;cellular_component;biological_process	Catalysis of the reaction: ATP + H2O = ADP + H+ phosphate. ATP hydrolysis is used in some reactions as an energy source, for example to catalyze a reaction or drive transport against a concentration gradient.;Binding to ATP, adenosine 5'-triphosphate, a universally important coenzyme and enzyme regulator.;Progression through the phases of the meiotic cell cycle, in which canonically a cell replic…	K06675	ko04111	Cell cycle - yeast
Solyc02g083120.3	Solyc02g083120.3	10.732080850445325	9.032218945887948	8.083718599382104	2.425974797360273	2.621198188590586	2.3070248430358187	2.45281948001633	1.65984519569222	1.002595e-06	1.445192e-05	A0A3Q7F8K5	DUF241 domain-containing protein	-	-	PF03087	Protein BPS1	IPR004320	Protein BPS1, chloroplastic	-	-	GO:0048367;GO:0048364	biological_process;biological_process	The process whose specific outcome is the progression of the shoot system over time, from its formation to the mature structure.;The process whose specific outcome is the progression of the root over time, from its formation to the mature structure. The root is the water- and mineral-absorbing part of a plant which is usually underground, does not bear leaves, tends to grow downwards and is typic…	-	-	-
Solyc06g051260.4	Solyc06g051260.4	318.0335506976749	264.5392162787928	267.8090011033421	101.27939835103652	122.72889262848902	104.27480629987848	7.29244349935289	1.11924742488496	1.003005e-06	1.445192e-05	A0A3Q7GVN0	BHLH domain-containing protein	-	-	PF00010	Helix-loop-helix DNA-binding domain	IPR011598;IPR036638;IPR045847	Myc-type, basic helix-loop-helix (bHLH) domain;Helix-loop-helix DNA-binding domain superfamily;Transcription factor AIG1-like	-	-	GO:0003700;GO:0006355;GO:0080090;GO:0005634;GO:0046983	molecular_function;biological_process;biological_process;cellular_component;molecular_function	A transcription regulator activity that modulates transcription of gene sets via selective and non-covalent binding to a specific double-stranded genomic DNA sequence (sometimes referred to as a motif) within a cis-regulatory region. Regulatory regions include promoters (proximal and distal) and enhancers. Genes are transcriptional units, and include bacterial operons.;Any process that modulates …	-	-	-
Solyc11g067140.2	Solyc11g067140.2	3.702814507859513	3.1978624557980453	3.62443501341564	1.131543869349074	1.0483313888005368	1.152810771626475	3.06142878409155	1.40984492744253	1.019715e-06	1.461666e-05	A0A3Q7JP74	DNA polymerase epsilon catalytic subunit	XP_010313338.1	DNA polymerase epsilon catalytic subunit A-like isoform X1	PF00136;PF03104;PF08490	DNA polymerase family B;DNA polymerase family B, exonuclease domain;Domain of unknown function (DUF1744)	IPR006133;IPR006134;IPR006172;IPR012337;IPR013697;IPR023211;IPR029703;IPR036397;IPR042087;IPR043502	DNA-directed DNA polymerase, family B, exonuclease domain;DNA-directed DNA polymerase, family B, multifunctional domain;DNA-directed DNA polymerase, family B;Ribonuclease H-like superfamily;DNA polymerase epsilon, catalytic subunit A, C-terminal;DNA polymerase, palm domain superfamily;DNA polymerase epsilon catalytic subunit;Ribonuclease H superfamily;DNA polymerase family B, thumb domain;DNA/RNA…	-	-	GO:0071897;GO:0051539;GO:0000166;GO:0006272;GO:0003887;GO:0008270;GO:0006260;GO:0005634;GO:0006281;GO:0003677;GO:0045004;GO:0008622;GO:0046872;GO:0000278;GO:0006287;GO:0006297;GO:0008310	biological_process;molecular_function;molecular_function;biological_process;molecular_function;molecular_function;biological_process;cellular_component;biological_process;molecular_function;biological_process;cellular_component;molecular_function;biological_process;biological_process;biological_process;molecular_function	The biosynthetic process resulting in the formation of DNA.;Binding to a 4 iron, 4 sulfur (4Fe-4S) cluster; this cluster consists of four iron atoms, with the inorganic sulfur atoms found between the irons and acting as bridging ligands.;Binding to a nucleotide, any compound consisting of a nucleoside that is esterified with (ortho)phosphate or an oligophosphate at any hydroxyl group on the ribos…	K02324	ko03420;ko03410;ko03030	Nucleotide excision repair;Base excision repair;DNA replication
Solyc07g008010.4	Solyc07g008010.4	86.56346664003841	90.8865943884691	102.13510921170648	26.16703711537697	21.82882964698664	27.03142349878582	5.60802197411661	1.64819812474063	1.051612e-06	1.499629e-05	A0A3Q7H7Q8	Transcription factor MYB82-like	XP_004242766.1	transcription factor MYB82	PF00249	Myb-like DNA-binding domain	IPR001005;IPR009057;IPR017930	SANT/Myb domain;Homeobox-like domain superfamily;Myb domain	-	-	GO:0010597;GO:0006355;GO:0005634;GO:0000976;GO:0000987	biological_process;biological_process;cellular_component;molecular_function;molecular_function	The chemical reactions and pathways resulting in the formation of volatile molecules emitted from green plants, such as hexenal, hexenol and hexenyl acetate, from linoleic acid or linolenic acid.;Any process that modulates the frequency, rate or extent of cellular DNA-templated transcription.;A membrane-bounded organelle of eukaryotic cells in which chromosomes are housed and replicated. In most …	K09422	-	-
Solyc01g109010.3	Solyc01g109010.3	10.428005226349372	7.245864781479055	11.299439624630809	1.428900999091096	1.5370030527430436	1.739924149198052	2.86993343006651	2.37249152338221	1.055081e-06	1.503471e-05	A0A3Q7ESU6	Uncharacterized protein	-	-	-	-	-	-	-	-	-	-	-	-	-	-
Solyc01g109860.3	Solyc01g109860.3	1.956511618870192	1.8984375588769893	1.7004254222349997	0.371062125241332	0.4337343441111387	0.3455168523230174	1.33524936374385	2.00288205491895	1.055939e-06	1.503589e-05	A0A3Q7ETS3	CRAL-TRIO domain-containing protein	XP_004230875.1	phosphatidylinositol/phosphatidylcholine transfer protein SFH12-like	PF00650;PF03765	CRAL/TRIO domain;CRAL/TRIO, N-terminal domain	IPR001251;IPR011074;IPR036273;IPR036865	CRAL-TRIO lipid binding domain;CRAL/TRIO, N-terminal domain;CRAL/TRIO, N-terminal domain superfamily;CRAL-TRIO lipid binding domain superfamily	-	-	GO:0005886;GO:0000139	cellular_component;cellular_component	The membrane surrounding a cell that separates the cell from its external environment. It consists of a phospholipid bilayer and associated proteins.;The lipid bilayer surrounding any of the compartments of the Golgi apparatus.	-	-	-
Solyc06g069380.4	Solyc06g069380.4	5.574566896447838	4.482339228494494	4.957588895137164	1.6834915124071297	1.6962576800403055	1.6235792965870208	3.00337234434653	1.33149530900018	1.078301e-06	1.528697e-05	A0A3Q7GXH2	O-fucosyltransferase family protein	-	-	PF10250	GDP-fucose protein O-fucosyltransferase	IPR019378;IPR024709	GDP-fucose protein O-fucosyltransferase;Putative O-fucosyltransferase, plant	-	-	GO:0016740;GO:0005737;GO:0006004	molecular_function;cellular_component;biological_process	Catalysis of the transfer of a group, e.g. a methyl group, glycosyl group, acyl group, phosphorus-containing, or other groups, from one compound (generally regarded as the donor) to another compound (generally regarded as the acceptor). Transferase is the systematic name for any enzyme of EC class 2.;The contents of a cell excluding the plasma membrane and nucleus, but including other subcellular…	-	-	-
Solyc02g089700.4	Solyc02g089700.4	8.828214090999406	10.481930452474955	10.176418395770291	2.480542803679531	2.2696828426734004	2.59069152940297	3.13159786079838	1.76107511632696	1.084669e-06	1.535566e-05	A0A6G8RR30	Xyloglucan backbone O-acetyltransferase 7	XP_019068017.1	protein trichome birefringence-like 19 isoform X2	PF13839;PF14416	GDSL/SGNH-like Acyl-Esterase family found in Pmr5 and Cas1p;PMR5 N terminal Domain	IPR025846;IPR026057;IPR029962	Trichome birefringence-like, N-terminal domain;Trichome birefringence-like, C-terminal domain;Trichome birefringence-like family	-	-	GO:0016413;GO:0016740	molecular_function;molecular_function	Catalysis of the transfer of an acetyl group to an oxygen atom on the acceptor molecule.;Catalysis of the transfer of a group, e.g. a methyl group, glycosyl group, acyl group, phosphorus-containing, or other groups, from one compound (generally regarded as the donor) to another compound (generally regarded as the acceptor). Transferase is the systematic name for any enzyme of EC class 2.	-	-	-
Solyc08g079020.3	Solyc08g079020.3	19.892468986180617	16.884090102087253	16.251434476518188	5.489286259307836	6.020348569432861	4.560156072935145	3.35501610192988	1.46357745003113	1.087567e-06	1.538459e-05	A0A3Q7IP67	adenine phosphoribosyltransferase	XP_004245742.1	adenine phosphoribosyltransferase 4	PF00156	Phosphoribosyl transferase domain	IPR000836;IPR005764;IPR029057	Phosphoribosyltransferase domain;Adenine phosphoribosyl transferase;Phosphoribosyltransferase-like	-	-	GO:0006166;GO:0005829;GO:0006168;GO:0005737;GO:0003999;GO:0044209	biological_process;cellular_component;biological_process;cellular_component;molecular_function;biological_process	Any process which produces a purine nucleoside from derivatives of it, without de novo synthesis.;The part of the cytoplasm that does not contain organelles but which does contain other particulate matter, such as protein complexes.;Any process that generates adenine, 6-aminopurine, from derivatives of it without de novo synthesis.;The contents of a cell excluding the plasma membrane and nucleus,…	K00759	ko00230;ko01100	Purine metabolism;Metabolic pathways
Solyc05g006030.3	Solyc05g006030.3	10.740402190215336	10.290341783546296	10.55215627431315	3.144309118954251	3.2645749290452977	3.502955480738395	2.57592455049154	1.42049168007615	1.098857e-06	1.547792e-05	A0A3Q7GDI3	DUF4228 domain-containing protein	XP_004238705.1	uncharacterized protein LOC101263113	PF14009	PADRE domain	IPR025322	PADRE domain	-	-	-	-	-	-	-	-
Solyc01g095760.3	Solyc01g095760.3	3.0238157090364397	2.8289344195320894	2.3473674575039483	0.4129984823179425	0.5611496374564755	0.4437301815032604	1.30936935099231	2.25148941137449	1.099389e-06	1.547792e-05	A0A3Q7ELE8	Glycosyltransferase	-	-	PF00201	UDP-glucoronosyl and UDP-glucosyl transferase	IPR002213;IPR035595	UDP-glucuronosyl/UDP-glucosyltransferase;UDP-glycosyltransferase family, conserved site	-	-	GO:0008194;GO:0016757	molecular_function;molecular_function	Catalysis of the transfer of a glycosyl group from a UDP-sugar to a small hydrophobic molecule.;Catalysis of the transfer of a glycosyl group from one compound (donor) to another (acceptor).	-	-	-
Solyc07g008670.3	Solyc07g008670.3	5.917821147735456	6.936625113667241	6.466503800333225	2.005124478911048	2.093461893209823	1.8815579034702643	3.69817101075442	1.44202506013866	1.107446e-06	1.557031e-05	A0A3Q7H838	DUF4378 domain-containing protein	XP_004242812.1;XP_010323340.1	-;-	PF14309;PF14383	Domain of unknown function (DUF4378);DUF761-associated sequence motif	IPR025486;IPR032795;IPR033334	Domain of unknown function DUF4378;DUF3741-associated sequence motif;Protein LONGIFOLIA 1/2	-	-	GO:0051513	biological_process	Any process that modulates the frequency, rate or extent of monopolar cell growth, polarized growth from one end of a cell.	-	-	-
Solyc02g078950.4	Solyc02g078950.4	5.605233266106021	4.900235830000495	5.232921531745267	1.6997282325775536	2.0236043398123744	1.9861493064917504	3.36770888435129	1.20795381389142	1.110583e-06	1.558512e-05	P48980	Beta-galactosidase	NP_001234465.1	beta-galactosidase precursor	PF21467;PF02140;PF17834;PF01301	Beta-galactosidase, galactose-binding domain;Galactose binding lectin domain;Beta-sandwich domain in beta galactosidase;Glycosyl hydrolases family 35	IPR000922;IPR001944;IPR008979;IPR017853;IPR019801;IPR031330;IPR041392;IPR043159;IPR048913	D-galactoside/L-rhamnose binding SUEL lectin domain;Glycoside hydrolase, family 35;Galactose-binding-like domain superfamily;Glycoside hydrolase superfamily;Glycoside hydrolase, family 35, conserved site;Glycoside hydrolase 35, catalytic domain;Beta-galactosidase, beta-sandwich domain;D-galactoside/L-rhamnose binding SUEL lectin domain superfamily;Beta-galactosidase, galactose-binding domain	KOG0496	Beta-galactosidase	GO:0005975;GO:0005773;GO:0016798;GO:0030246;GO:0004553;GO:0004565	biological_process;cellular_component;molecular_function;molecular_function;molecular_function;molecular_function	The chemical reactions and pathways involving carbohydrates, any of a group of organic compounds based of the general formula Cx(H2O)y.;A closed structure, found only in eukaryotic cells, that is completely surrounded by unit membrane and contains liquid material. Cells contain one or several vacuoles, that may have different functions from each other. Vacuoles have a diverse array of functions. …	-	-	-
Solyc09g059475.1	Solyc09g059475.1	14.85718777405365	16.298997870826803	13.398789063086804	4.103510561492378	3.7627178558955374	3.9462889092707982	2.74499267124828	1.66417967441055	1.114134e-06	1.562365e-05	A0A3Q7I2J8	Ulp1 protease family, C-terminal catalytic domain containing protein	-	-	-	-	-	-	-	-	-	-	-	-	-	-
Solyc07g053570.4	Solyc07g053570.4	3.2832940025627484	2.6705973570092127	2.959233252842916	0.7632398051305972	0.7360527713830929	0.7597090761172869	1.7910466602637	1.72871930566014	1.126802e-06	1.57671e-05	A0A3Q7HF56	C2H2-type domain-containing protein	-	-	PF00096	Zinc finger, C2H2 type	IPR013087;IPR031140;IPR036236	Zinc finger C2H2-type;Protein indeterminate-domain 1-16;Zinc finger C2H2 superfamily	-	-	GO:0003700;GO:0006355;GO:0005634	molecular_function;biological_process;cellular_component	A transcription regulator activity that modulates transcription of gene sets via selective and non-covalent binding to a specific double-stranded genomic DNA sequence (sometimes referred to as a motif) within a cis-regulatory region. Regulatory regions include promoters (proximal and distal) and enhancers. Genes are transcriptional units, and include bacterial operons.;Any process that modulates …	-	-	-
Solyc04g077780.3	Solyc04g077780.3	28.22452163466544	22.326294745277583	22.47443608158947	8.286560534749366	9.323653667870808	7.594888392954483	4.16872227176966	1.27662771762532	1.129644e-06	1.578409e-05	A0A3Q7G668	LIM zinc-binding domain-containing protein	XP_004238086.1	LIM domain-containing protein WLIM1	PF00412	LIM domain	IPR001781	Zinc finger, LIM-type	-	-	GO:0015629;GO:0046872;GO:0005886;GO:0051015;GO:0051017	cellular_component;molecular_function;cellular_component;molecular_function;biological_process	The part of the cytoskeleton (the internal framework of a cell) composed of actin and associated proteins. Includes actin cytoskeleton-associated complexes.;Binding to a metal ion.;The membrane surrounding a cell that separates the cell from its external environment. It consists of a phospholipid bilayer and associated proteins.;Binding to an actin filament, also known as F-actin, a helical filam…	K09377	-	-
Solyc06g068570.4	Solyc06g068570.4	82.24121552990796	84.98967523386236	75.9981	33.18717786499834	30.716540449514877	30.80537547994405	6.2713714749059	1.10740207251743	1.148003e-06	1.598304e-05	A0A3Q7H019	AP2/ERF domain-containing protein	-	-	PF00847	AP2 domain	IPR001471;IPR016177;IPR036955	AP2/ERF domain;DNA-binding domain superfamily;AP2/ERF domain superfamily	-	-	GO:0003700;GO:0006355;GO:0006952;GO:0005634;GO:0003677	molecular_function;biological_process;biological_process;cellular_component;molecular_function	A transcription regulator activity that modulates transcription of gene sets via selective and non-covalent binding to a specific double-stranded genomic DNA sequence (sometimes referred to as a motif) within a cis-regulatory region. Regulatory regions include promoters (proximal and distal) and enhancers. Genes are transcriptional units, and include bacterial operons.;Any process that modulates …	-	-	-
Solyc12g007230.2	Solyc12g007230.2	49.91094393348545	42.71851001210462	49.850718434041255	12.458405938945326	17.467467599879214	15.593851198324035	5.32769725566194	1.39409943928199	1.152051e-06	1.60164e-05	G9HPV7	Auxin-responsive protein	NP_001266052.1	auxin-responsive protein IAA8	PF02309	AUX/IAA family	IPR000270;IPR003311;IPR033389	PB1 domain;AUX/IAA protein;AUX/IAA domain	ENOG502QTW8	-	GO:0009734;GO:0006355;GO:0005634	biological_process;biological_process;cellular_component	The series of molecular signals generated by the binding of the plant hormone auxin to a receptor, and ending with modulation of a downstream cellular process, e.g. transcription.;Any process that modulates the frequency, rate or extent of cellular DNA-templated transcription.;A membrane-bounded organelle of eukaryotic cells in which chromosomes are housed and replicated. In most cells, the nucle…	K14484	ko04075	Plant hormone signal transduction
Solyc03g098430.4	Solyc03g098430.4	11.05033525197284	10.72077755008746	10.345735687902344	3.7429849544116056	3.649134488395392	3.530567880470166	2.83326970032649	1.30382387794754	1.164524e-06	1.614352e-05	Q40144	Probable xyloglucan endotransglucosylase/hydrolase 1	NP_001233858.1	probable xyloglucan endotransglucosylase/hydrolase 1 precursor	PF00722;PF06955	Glycosyl hydrolases family 16;Xyloglucan endo-transglycosylase (XET) C-terminus	IPR000757;IPR008263;IPR008264;IPR010713;IPR013320;IPR016455;IPR044791	Glycoside hydrolase family 16;Glycoside hydrolase, family 16, active site;Beta-glucanase;Xyloglucan endo-transglycosylase, C-terminal;Concanavalin A-like lectin/glucanase domain superfamily;Xyloglucan endotransglucosylase/hydrolase;Beta-glucanase/XTH	ENOG502QQ71	-	GO:0042546;GO:0016740;GO:0016798;GO:0048046;GO:0030247;GO:0016762;GO:0004553;GO:0071555;GO:0010411	biological_process;molecular_function;molecular_function;cellular_component;molecular_function;molecular_function;molecular_function;biological_process;biological_process	A cellular process that results in the biosynthesis of constituent macromolecules, assembly, and arrangement of constituent parts of a cell wall. Includes biosynthesis of constituent macromolecules, such as proteins and polysaccharides, and those macromolecular modifications that are involved in synthesis or assembly of the cellular component. A cell wall is the rigid or semi-rigid envelope lying…	K08235	-	-
Solyc06g068440.4	Solyc06g068440.4	4.505689333009335	4.624635711938764	3.975728756814543	0.9305012611093828	1.177898190239169	1.0050728978872032	1.82370764756235	1.80703424327531	1.17273e-06	1.624566e-05	P51107	Dihydroflavonol 4-reductase	NP_001234408.1	-	PF01370	NAD dependent epimerase/dehydratase family	IPR001509;IPR036291	NAD-dependent epimerase/dehydratase;NAD(P)-binding domain superfamily	KOG1502	Flavonol reductase/cinnamoyl-CoA reductase	GO:0016491;GO:0009813;GO:0009718;GO:0047890;GO:0045552	molecular_function;biological_process;biological_process;molecular_function;molecular_function	Catalysis of an oxidation-reduction (redox) reaction, a reversible chemical reaction in which the oxidation state of an atom or atoms within a molecule is altered. One substrate acts as a hydrogen or electron donor and becomes oxidized, while the other acts as hydrogen or electron acceptor and becomes reduced.;The chemical reactions and pathways resulting in the formation of flavonoids, a group o…	K13082	ko00941;ko01110;ko01100	Flavonoid biosynthesis;Biosynthesis of secondary metabolites;Metabolic pathways
Solyc11g010270.2	Solyc11g010270.2	268.389837761156	265.6764905861993	291.4888364975546	91.78317389339756	88.70910313522143	101.12425137261307	7.6608874230784	1.29933788403171	1.184382e-06	1.638366e-05	A0A3Q7JIT6	Homeobox-leucine zipper protein	XP_004250119.1	homeobox-leucine zipper protein ATHB-6	PF02183;PF00046	Homeobox associated leucine zipper;Homeodomain	IPR000047;IPR001356;IPR003106;IPR009057;IPR017970;IPR045224	Helix-turn-helix motif;Homeobox domain;Leucine zipper, homeobox-associated;Homeobox-like domain superfamily;Homeobox, conserved site;Homeobox-leucine zipper protein, class I, plant	-	-	GO:0000981;GO:0006357;GO:0006355;GO:0045893;GO:0005634;GO:0003677;GO:0043565	molecular_function;biological_process;biological_process;biological_process;cellular_component;molecular_function;molecular_function	A DNA-binding transcription factor activity that modulates the transcription of specific gene sets transcribed by RNA polymerase II.;Any process that modulates the frequency, rate or extent of transcription mediated by RNA polymerase II.;Any process that modulates the frequency, rate or extent of cellular DNA-templated transcription.;Any process that activates or increases the frequency, rate or …	K09338	-	-
Solyc10g009320.3	Solyc10g009320.3	2.5596012828312094	2.150997555549018	2.348164796993589	0.2692928805979372	0.4246982119421567	0.3223977099984626	0.813795980989277	2.50679406528528	1.198215e-06	1.653144e-05	A0A3Q7IBR2	Protein TILLER ANGLE CONTROL 1	XP_004248091.1	uncharacterized protein LOC101266870	-	-	IPR044989	Protein TILLER ANGLE CONTROL 1	-	-	GO:0001763	biological_process	The process in which the anatomical structures of branches are generated and organized. A branch is a division or offshoot from a main stem. Examples in animals would include blood vessels, nerves, lymphatics and other endothelial or epithelial tubes.	-	-	-
Solyc11g071420.3	Solyc11g071420.3	3.801411334486935	3.0504808638365306	4.056209096021315	0.597367956015433	0.4196631904054838	0.6826618176973236	2.8813578307804	2.44784724919715	1.213952e-06	1.670928e-05	Q71BH1	ToMV susceptible protein tm-2	NP_001318061.1	Tm-2 ToMV resistant protein	PF00931;PF18052	NB-ARC domain;Rx N-terminal domain	IPR002182;IPR003593;IPR027417;IPR032675;IPR036388;IPR038005;IPR041118;IPR042197;IPR044974	NB-ARC;AAA+ ATPase domain;P-loop containing nucleoside triphosphate hydrolase;Leucine-rich repeat domain superfamily;Winged helix-like DNA-binding domain superfamily;Virus X resistance protein-like, coiled-coil domain;Disease resistance, N-terminal;Apoptotic protease-activating factors, helical domain;Disease resistance protein, plants	KOG4658	Apoptotic ATPase	GO:0005886;GO:0043531;GO:0016887;GO:0006952;GO:0098542;GO:0005524	cellular_component;molecular_function;molecular_function;biological_process;biological_process;molecular_function	The membrane surrounding a cell that separates the cell from its external environment. It consists of a phospholipid bilayer and associated proteins.;Binding to ADP, adenosine 5'-diphosphate.;Catalysis of the reaction: ATP + H2O = ADP + H+ phosphate. ATP hydrolysis is used in some reactions as an energy source, for example to catalyze a reaction or drive transport against a concentration gradient…	-	-	-
Solyc07g043570.3	Solyc07g043570.3	115.90457649894488	101.97321744824974	100.15147646676635	39.27041476962809	49.317532570272725	42.71202520287274	6.62004	1.02350012357259	1.236067e-06	1.698956e-05	A0A3Q7HCH3	NADP-dependent oxidoreductase domain-containing protein	NP_001317632.1	NAD(P)-linked oxidoreductase superfamily protein	PF00248	Aldo/keto reductase family	IPR018170;IPR020471;IPR023210;IPR036812	Aldo/keto reductase, conserved site;Aldo-keto reductase;NADP-dependent oxidoreductase domain;NADP-dependent oxidoreductase domain superfamily	-	-	GO:0004033;GO:0016491;GO:0005737	molecular_function;molecular_function;cellular_component	Catalysis of the reaction: an alcohol + NADP+ = an aldehyde or a ketone + NADPH + H+.;Catalysis of an oxidation-reduction (redox) reaction, a reversible chemical reaction in which the oxidation state of an atom or atoms within a molecule is altered. One substrate acts as a hydrogen or electron donor and becomes oxidized, while the other acts as hydrogen or electron acceptor and becomes reduced.;T…	-	-	-
Solyc03g033330.3	Solyc03g033330.3	15.182592224656917	17.35505720032712	20.610612469158312	3.69315950534314	3.833173605221517	4.144326118270835	3.44371357047775	1.94271748423816	1.23955e-06	1.702538e-05	A0A3Q7G4V8	RING-type domain-containing protein	XP_004234521.1	NEP1-interacting protein-like 1	PF13639	Ring finger domain	IPR001841;IPR013083;IPR044523	Zinc finger, RING-type;Zinc finger, RING/FYVE/PHD-type;RING domain-containing protein NIP1/2-like	-	-	GO:0016020	cellular_component	A lipid bilayer along with all the proteins and protein complexes embedded in it and attached to it.	-	-	-
Solyc09g092330.3	Solyc09g092330.3	676.8681538050253	563.7040442089597	676.5071783210253	187.90998474083415	225.47235363859687	213.03184534304427	9.10909920469172	1.36165501493729	1.299226e-06	1.766984e-05	A0A3Q7I8J3	NAD(P)-binding domain-containing protein	-	-	PF01370	NAD dependent epimerase/dehydratase family	IPR001509;IPR036291	NAD-dependent epimerase/dehydratase;NAD(P)-binding domain superfamily	-	-	GO:0016020	cellular_component	A lipid bilayer along with all the proteins and protein complexes embedded in it and attached to it.	-	-	-
Solyc01g105690.2	Solyc01g105690.2	31.933941450485538	29.70775662288961	33.747232363514456	11.532394349477768	13.597684944646124	12.633484908277593	4.73460268103008	1.08577732802396	1.30251e-06	1.768969e-05	A0A3Q7H0K9	BHLH domain-containing protein	XP_004237974.1	transcription factor bHLH143-like	-	-	IPR011598;IPR036638;IPR037546	Myc-type, basic helix-loop-helix (bHLH) domain;Helix-loop-helix DNA-binding domain superfamily;Transcription factor SAC51-like	-	-	GO:0005634;GO:0046983	cellular_component;molecular_function	A membrane-bounded organelle of eukaryotic cells in which chromosomes are housed and replicated. In most cells, the nucleus contains all of the cell's chromosomes except the organellar chromosomes, and is the site of RNA synthesis and processing. In some species, or in specialized cell types, RNA metabolism or DNA replication may be absent.;The formation of a protein dimer, a macromolecular struc…	-	-	-
Solyc07g064380.4	Solyc07g064380.4	0.6164537848926027	0.4362490586021379	0.6203613911562013	0.0175551253967588	0.0129201119735225	0.0163465664011896	-0.199296	4.79185255674165	1.321972e-06	1.787889e-05	A0A3Q7HI82	Aminotransferase-like plant mobile domain-containing protein	-	-	PF10536	Plant mobile domain	IPR019557;IPR044824	Aminotransferase-like, plant mobile domain;Protein MAINTENANCE OF MERISTEMS-like	-	-	GO:0048507;GO:0010073	biological_process;biological_process	The process whose specific outcome is the progression of the meristem over time, from its formation to the mature structure.;Any process involved in maintaining the identity, size and shape of a meristem.	-	-	-
Solyc04g072850.4	Solyc04g072850.4	3.1233326233848158	2.5135605362670583	2.7745116256914857	0.3361237319993757	0.6321888691481278	0.4173116610269569	2.07947509191457	2.31636095172902	1.339653e-06	1.809277e-05	H1AC33	Beta-D-xylosidase	NP_001266114.1	alpha-L-arabinofuranosidase/beta-xylosidase precursor	PF14310;PF00933;PF01915	Fibronectin type III-like domain;Glycosyl hydrolase family 3 N terminal domain;Glycosyl hydrolase family 3 C-terminal domain	IPR001764;IPR002772;IPR013783;IPR017853;IPR026891;IPR036881;IPR036962;IPR044993	Glycoside hydrolase, family 3, N-terminal;Glycoside hydrolase family 3 C-terminal domain;Immunoglobulin-like fold;Glycoside hydrolase superfamily;Fibronectin type III-like domain;Glycoside hydrolase family 3 C-terminal domain superfamily;Glycoside hydrolase, family 3, N-terminal domain superfamily;Beta-D-xylosidase	ENOG502QQ55	-	GO:0045493;GO:0009044;GO:0016798;GO:0005576	biological_process;molecular_function;molecular_function;cellular_component	The chemical reactions and pathways resulting in the breakdown of xylan, a polymer containing a beta-1,4-linked D-xylose backbone.;Catalysis of the hydrolysis of (1->4)-beta-D-xylans so as to remove successive D-xylose residues from the non-reducing termini.;Catalysis of the hydrolysis of any glycosyl bond.;The space external to the outermost structure of a cell. For cells without external protec…	-	-	-
Solyc02g083190.2	Solyc02g083190.2	14.91935173963546	13.214327944113547	14.016244780279743	4.997249395728423	5.686513451391002	5.762834597665294	3.61177118583728	1.10397384649955	1.34148e-06	1.810485e-05	A0A3Q7F7D2	F-box domain-containing protein	-	-	PF03478;PF00646	Domain of unknown function (DUF295);F-box domain	IPR001810;IPR005174	F-box domain;Domain unknown function DUF295	-	-	-	-	-	-	-	-
Solyc03g026210.4	Solyc03g026210.4	36.261600483316286	32.40426565923088	37.15118785674069	13.671646981286646	14.157998377472191	14.87095743416332	4.87676296124171	1.05718021417116	1.354048e-06	1.819794e-05	A0A3Q7FHQ1	Dihydrodipicolinate reductase N-terminal domain-containing protein	-	-	PF01113	Dihydrodipicolinate reductase, N-terminus	IPR000846;IPR023940;IPR036291	Dihydrodipicolinate reductase, N-terminal;Dihydrodipicolinate reductase;NAD(P)-binding domain superfamily	-	-	GO:0009089;GO:0008839	biological_process;molecular_function	The chemical reactions and pathways resulting in the formation of lysine, via the intermediate diaminopimelate.;Catalysis of the reaction: (S)-2,3,4,5-tetrahydropyridine-2,6-dicarboxylate + NAD(P)+ + H2O = (2S,4S)-4-hydroxy-2,3,4,5-tetrahydrodipicolinate + NAD(P)H + H+.	-	-	-
Solyc06g150130.1	Solyc06g150130.1	33.41540693594656	29.24514915496973	24.534707773632327	7.507101585703791	9.463665112198358	6.678836920588696	4.55206953395327	1.62317349083909	1.360291e-06	1.824344e-05	A0A3Q7HTR9	Dof zinc finger protein	-	-	PF02701	Dof domain, zinc finger	IPR003851;IPR045174	Zinc finger, Dof-type;Dof zinc finger protein	-	-	GO:0003700;GO:0006355;GO:0005634;GO:0046872;GO:0003677	molecular_function;biological_process;cellular_component;molecular_function;molecular_function	A transcription regulator activity that modulates transcription of gene sets via selective and non-covalent binding to a specific double-stranded genomic DNA sequence (sometimes referred to as a motif) within a cis-regulatory region. Regulatory regions include promoters (proximal and distal) and enhancers. Genes are transcriptional units, and include bacterial operons.;Any process that modulates …	-	-	-
Solyc06g074420.1	Solyc06g074420.1	10.6737831273071	8.357887163968343	7.92045767926796	2.533031210797764	2.137667085989603	1.9812643906627052	2.98380212577797	1.76411895642532	1.361156e-06	1.824344e-05	A0A3Q7H0F6	Cytochrome P450	-	-	PF00067	Cytochrome P450	IPR001128;IPR002401;IPR036396	Cytochrome P450;Cytochrome P450, E-class, group I;Cytochrome P450 superfamily	-	-	GO:0020037;GO:0016020;GO:0005506;GO:0004497;GO:0046872;GO:0016705	molecular_function;cellular_component;molecular_function;molecular_function;molecular_function;molecular_function	Binding to a heme, a compound composed of iron complexed in a porphyrin (tetrapyrrole) ring.;A lipid bilayer along with all the proteins and protein complexes embedded in it and attached to it.;Binding to an iron (Fe) ion.;Catalysis of the incorporation of one atom from molecular oxygen into a compound and the reduction of the other atom of oxygen to water.;Binding to a metal ion.;Catalysis of an…	-	-	-
Solyc11g069590.2	Solyc11g069590.2	3.421500440374768	2.707445238111983	3.4104723251062823	0.7739841500860729	0.7235866448722784	0.8180921783025275	2.19667770194643	1.79578487133623	1.375331e-06	1.838261e-05	Q41328	Pto-interacting protein 1	NP_001233803.1;XP_010314665.1	pto-interacting protein 1;pto-interacting protein 1 isoform X1	PF07714	Protein tyrosine and serine/threonine kinase	IPR000719;IPR001245;IPR008271;IPR011009;IPR017441	Protein kinase domain;Serine-threonine/tyrosine-protein kinase, catalytic domain;Serine/threonine-protein kinase, active site;Protein kinase-like domain superfamily;Protein kinase, ATP binding site	KOG1187	Serine/threonine protein kinase	GO:0004672;GO:0005515;GO:0106310;GO:0004674;GO:0009626;GO:0005524	molecular_function;molecular_function;molecular_function;molecular_function;biological_process;molecular_function	Catalysis of the phosphorylation of an amino acid residue in a protein, usually according to the reaction: a protein + ATP = a phosphoprotein + ADP.;Binding to a protein.;Catalysis of the reactions: ATP + protein serine = ADP + protein serine phosphate.;Catalysis of the reactions: ATP + protein serine = ADP + protein serine phosphate, and ATP + protein threonine = ADP + protein threonine phosphat…	K13436	ko04626	Plant-pathogen interaction
Solyc08g007250.3	Solyc08g007250.3	11.19593128224709	11.000895963532791	11.023369351627096	4.659870906030574	4.913599500955918	4.260176209201983	4.47318970770877	1.01189108032724	1.403379e-06	1.870863e-05	A0A3Q7HHQ6	NB-ARC domain-containing protein	XP_004244708.1	-	PF13855;PF00931	Leucine rich repeat;NB-ARC domain	IPR001611;IPR002182;IPR027417;IPR032675;IPR036388;IPR042197	Leucine-rich repeat;NB-ARC;P-loop containing nucleoside triphosphate hydrolase;Leucine-rich repeat domain superfamily;Winged helix-like DNA-binding domain superfamily;Apoptotic protease-activating factors, helical domain	-	-	GO:0005524;GO:0098542;GO:0006952;GO:0043531	molecular_function;biological_process;biological_process;molecular_function	Binding to ATP, adenosine 5'-triphosphate, a universally important coenzyme and enzyme regulator.;Reactions triggered in response to the presence of another organism that act to protect the cell or organism from damage caused by that organism.;Reactions, triggered in response to the presence of a foreign body or the occurrence of an injury, which result in restriction of damage to the organism at…	K13459	ko04626	Plant-pathogen interaction
Solyc10g084250.1	Solyc10g084250.1	7.478962197089652	6.873540972966048	8.106800173904098	2.3416154450621325	2.509758593194648	1.9687197803538008	3.36431	1.46749444619441	1.403581e-06	1.870863e-05	Q8GUQ5	Brassinosteroid LRR receptor kinase	NP_001296180.1	brassinosteroid LRR receptor kinase precursor	PF20141;PF08263;PF00560;PF13855;PF00069	Brassinosteroid receptor island domain;Leucine rich repeat N-terminal domain;Leucine Rich Repeat;Leucine rich repeat;Protein kinase domain	IPR000719;IPR001611;IPR003591;IPR008271;IPR011009;IPR013210;IPR017441;IPR032675;IPR045381	Protein kinase domain;Leucine-rich repeat;Leucine-rich repeat, typical subtype;Serine/threonine-protein kinase, active site;Protein kinase-like domain superfamily;Leucine-rich repeat-containing N-terminal, plant-type;Protein kinase, ATP binding site;Leucine-rich repeat domain superfamily;Brassinosteroid receptor BRI1, island domain	ENOG502QRF2	-	GO:0005886;GO:0050832;GO:0004672;GO:0038023;GO:0009755;GO:0106310;GO:0009742;GO:0001578;GO:0005524;GO:0006952;GO:0009729;GO:0004674;GO:0005496;GO:0009647	cellular_component;biological_process;molecular_function;molecular_function;biological_process;molecular_function;biological_process;biological_process;molecular_function;biological_process;biological_process;molecular_function;molecular_function;biological_process	The membrane surrounding a cell that separates the cell from its external environment. It consists of a phospholipid bilayer and associated proteins.;Reactions triggered in response to the presence of a fungus that act to protect the cell or organism.;Catalysis of the phosphorylation of an amino acid residue in a protein, usually according to the reaction: a protein + ATP = a phosphoprotein + ADP…	K13415	ko04075	Plant hormone signal transduction
Solyc02g061780.3	Solyc02g061780.3	29.142467064754605	22.902181623623303	27.013687627191132	7.103782217927789	7.723473493680315	9.170423751067382	3.92639679593833	1.46642731634458	1.416632e-06	1.880781e-05	K4BNG7	NAC domain-containing protein 2	XP_004237044.1	-	PF02365	No apical meristem (NAM) protein	IPR003441;IPR036093	NAC domain;NAC domain superfamily	ENOG502QSIY	-	GO:0043565;GO:0010150;GO:0031155;GO:0003677;GO:0009738;GO:1902265;GO:0006355;GO:0009646;GO:0009737;GO:0005634	molecular_function;biological_process;biological_process;molecular_function;biological_process;biological_process;biological_process;biological_process;biological_process;cellular_component	Binding to DNA of a specific nucleotide composition, e.g. GC-rich DNA binding, or with a specific sequence motif or type of DNA e.g. promotor binding or rDNA binding.;The last stage of leaf development during which programmed degradation of macromolecules and nutrient recycling take place.;Any process that modulates the frequency, rate or extent of reproductive fruiting body development.;Any mole…	-	-	-
[truncated: 3,318 more rows]

## Sheet: S2
Supplementary Data Set S2 . Differentially expressed genes from the transcriptome analysis.
[truncated: 206 more rows]

## Sheet: S3
Data S3. The possible interaction proteins of SlCYP76B23 by Y1H screening.
[truncated: 11 more rows]

[truncated: 2 more sheets: S4, S5]
